# Supplementary material for: DNA Barcode Detects High Genetic Structure within Neotropical Bird Species
Source: PubMed Central journal article supplement (PMC3233584; doi:10.1371/journal.pone.0028543), 2011-12-07
Supplement: pone.0028543.s001.pdf [file pone.0028543.s001.pdf]

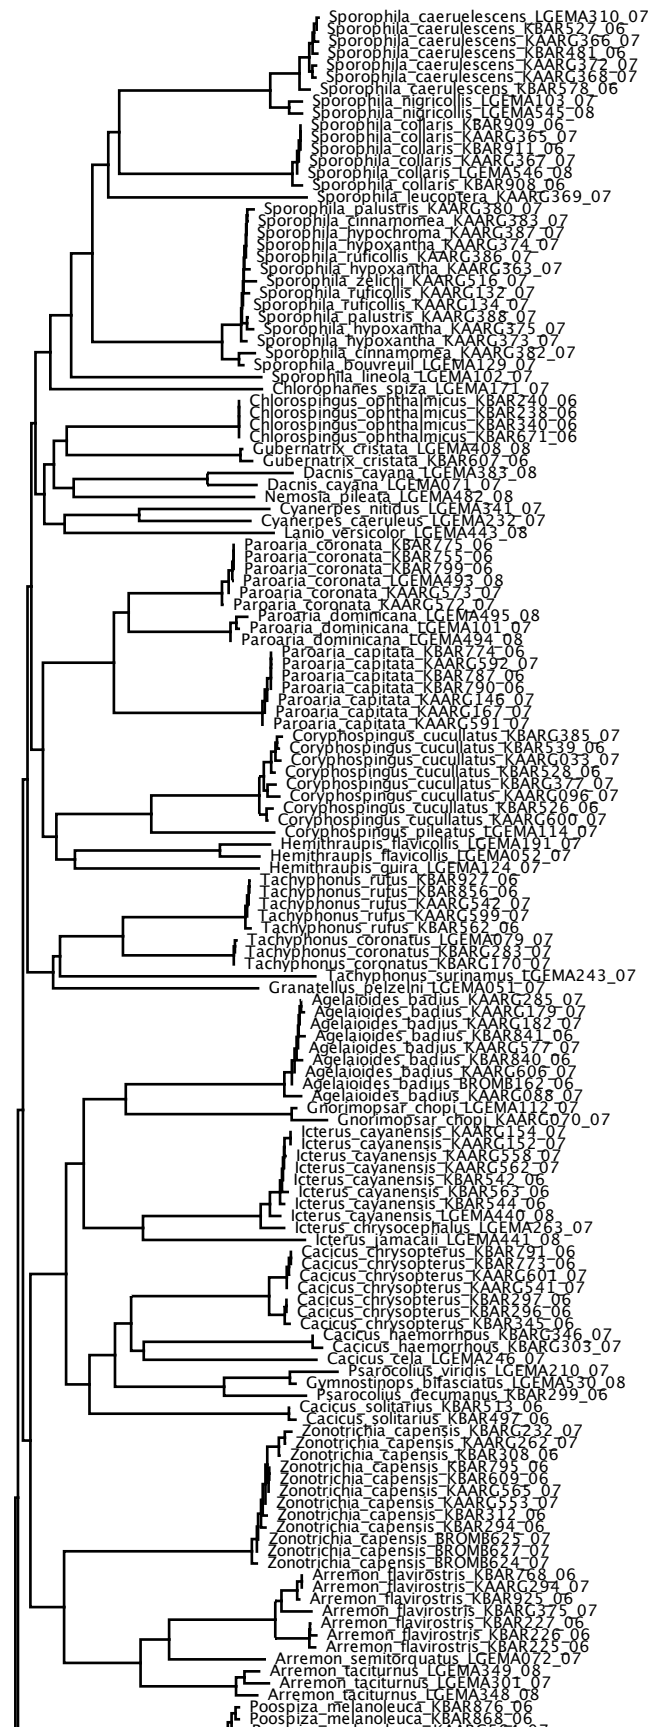

0.01

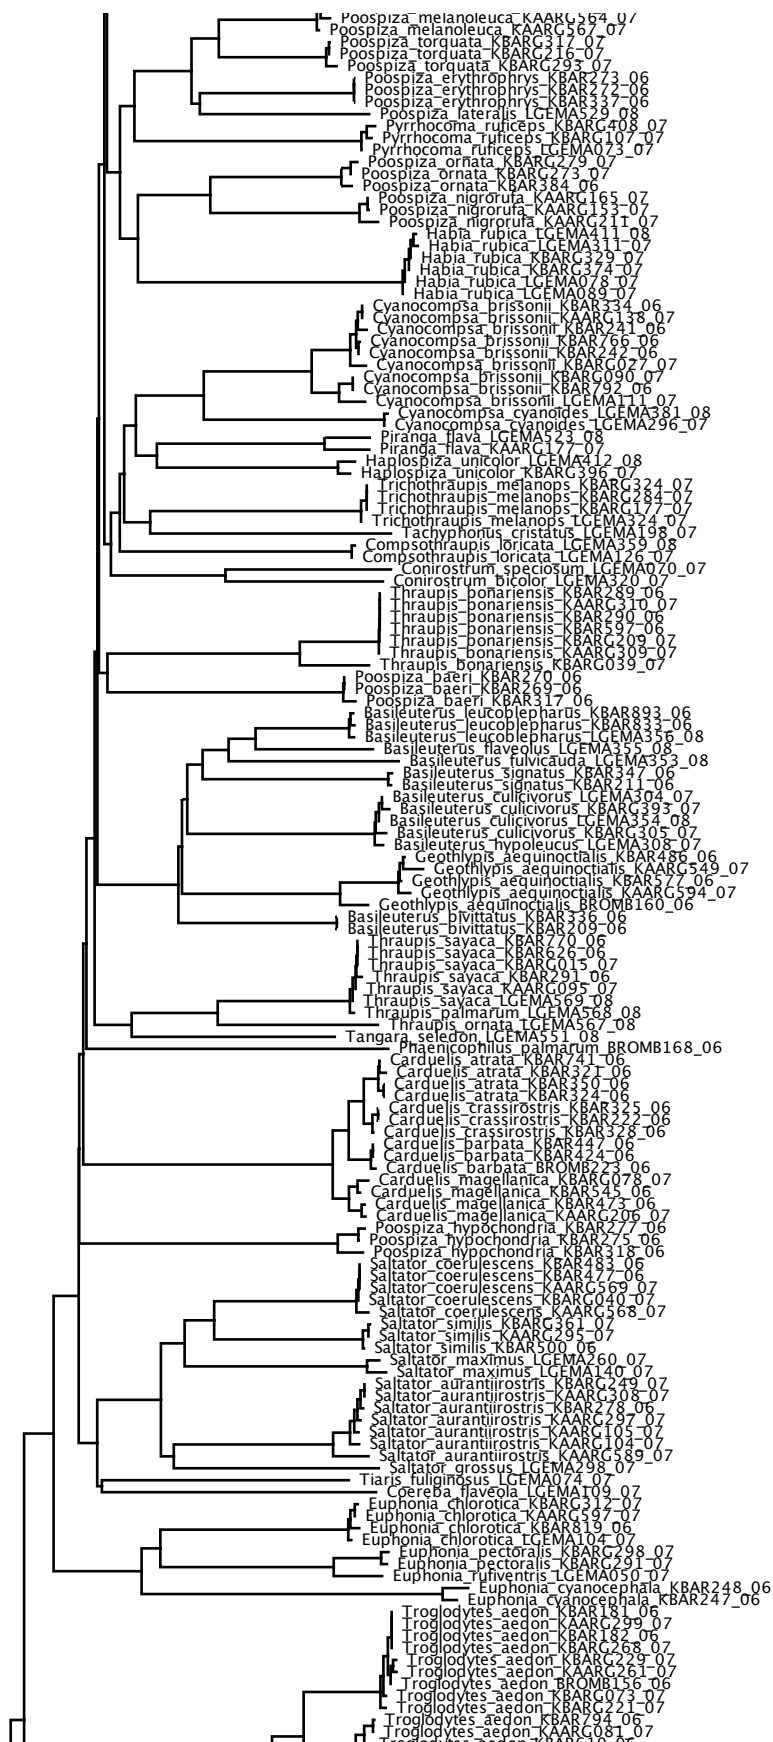

0.01

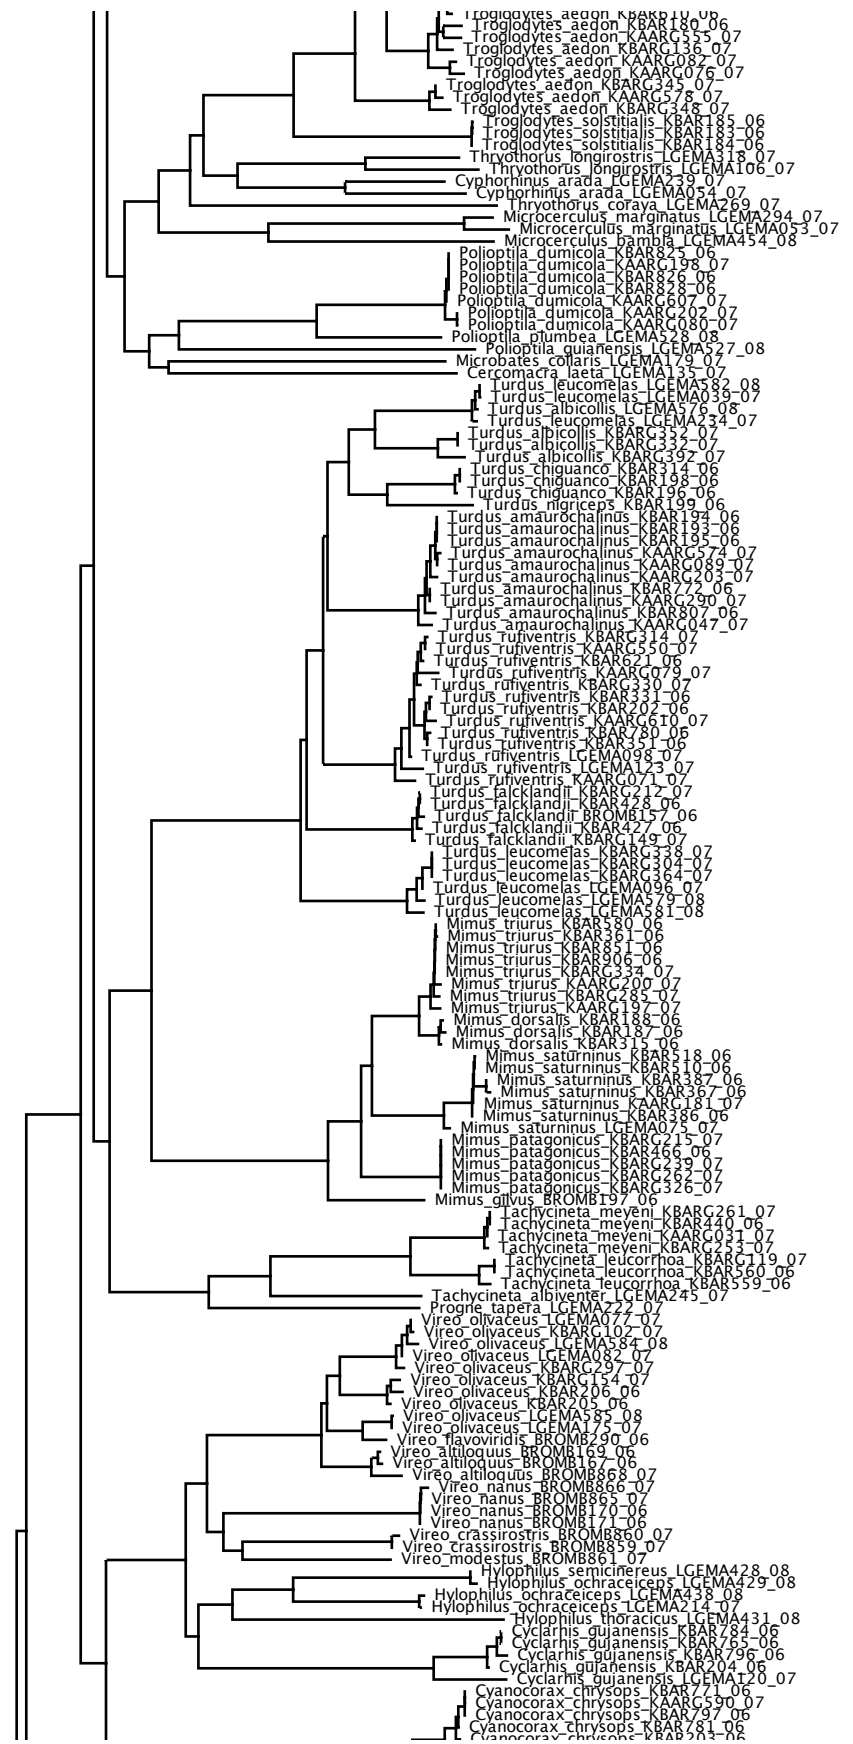

0.01

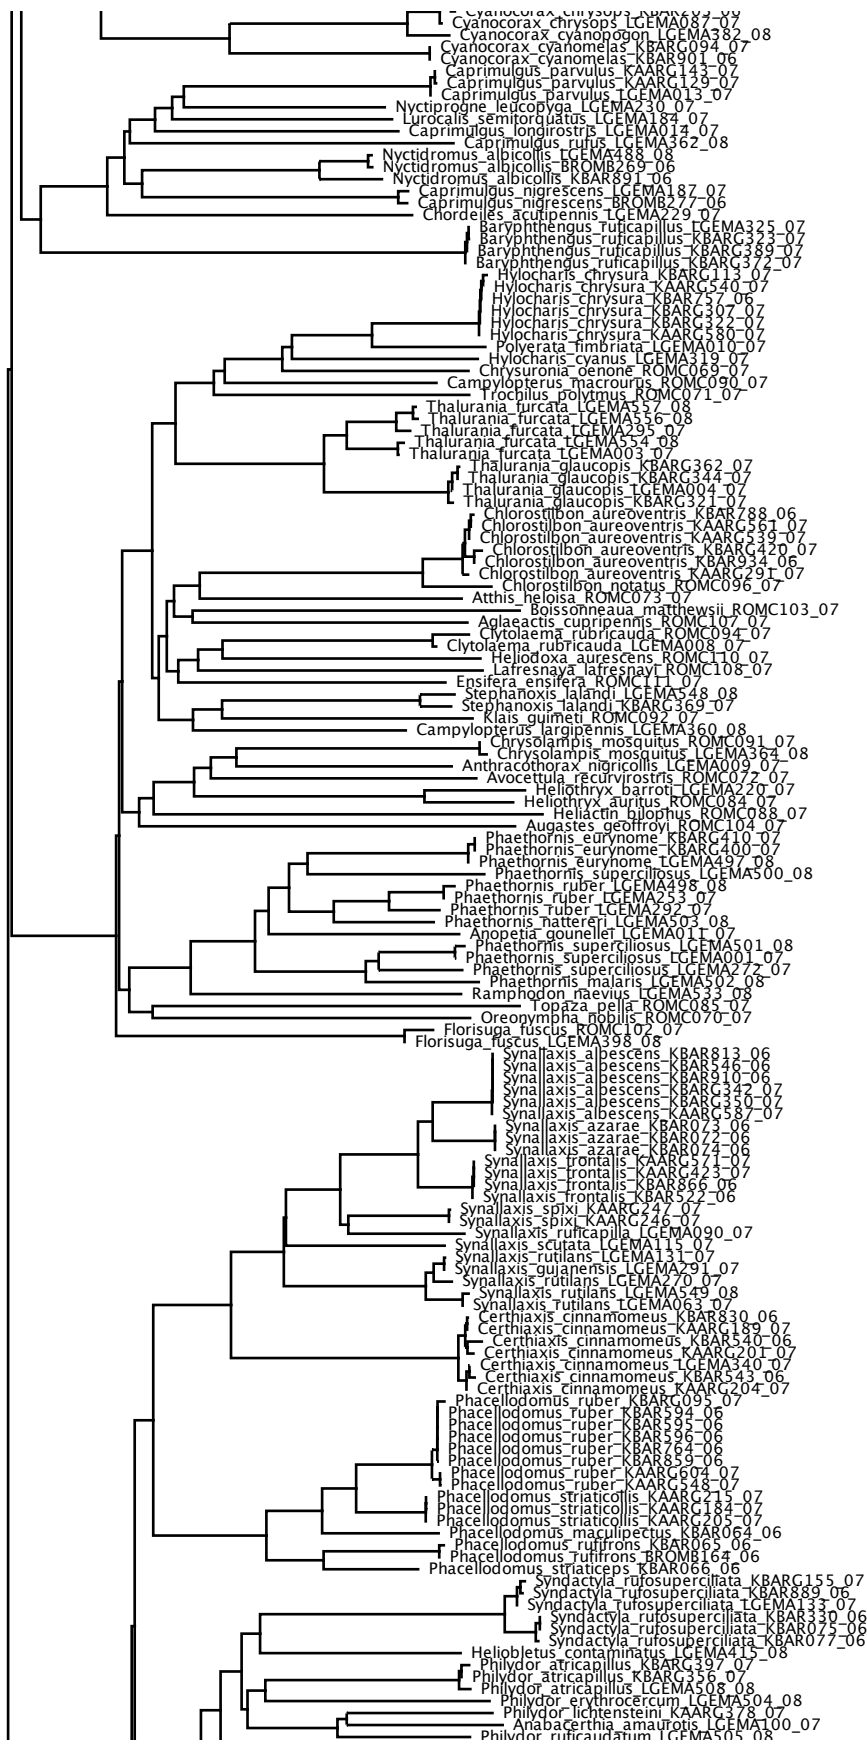

0.01

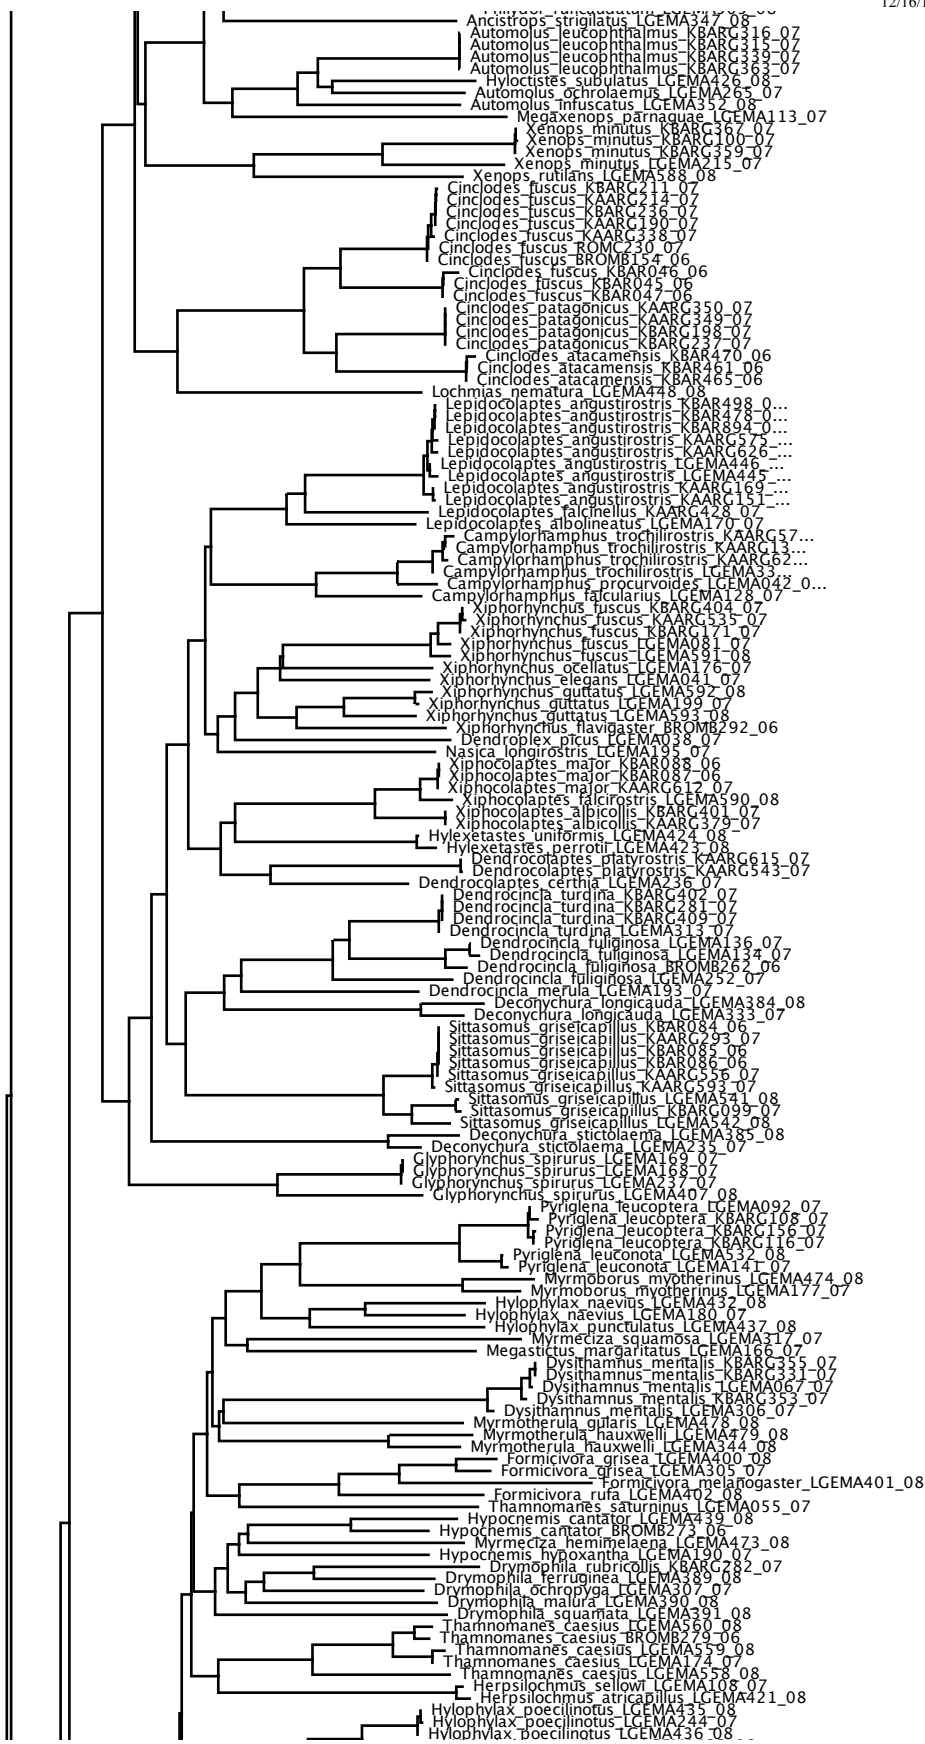

0.01



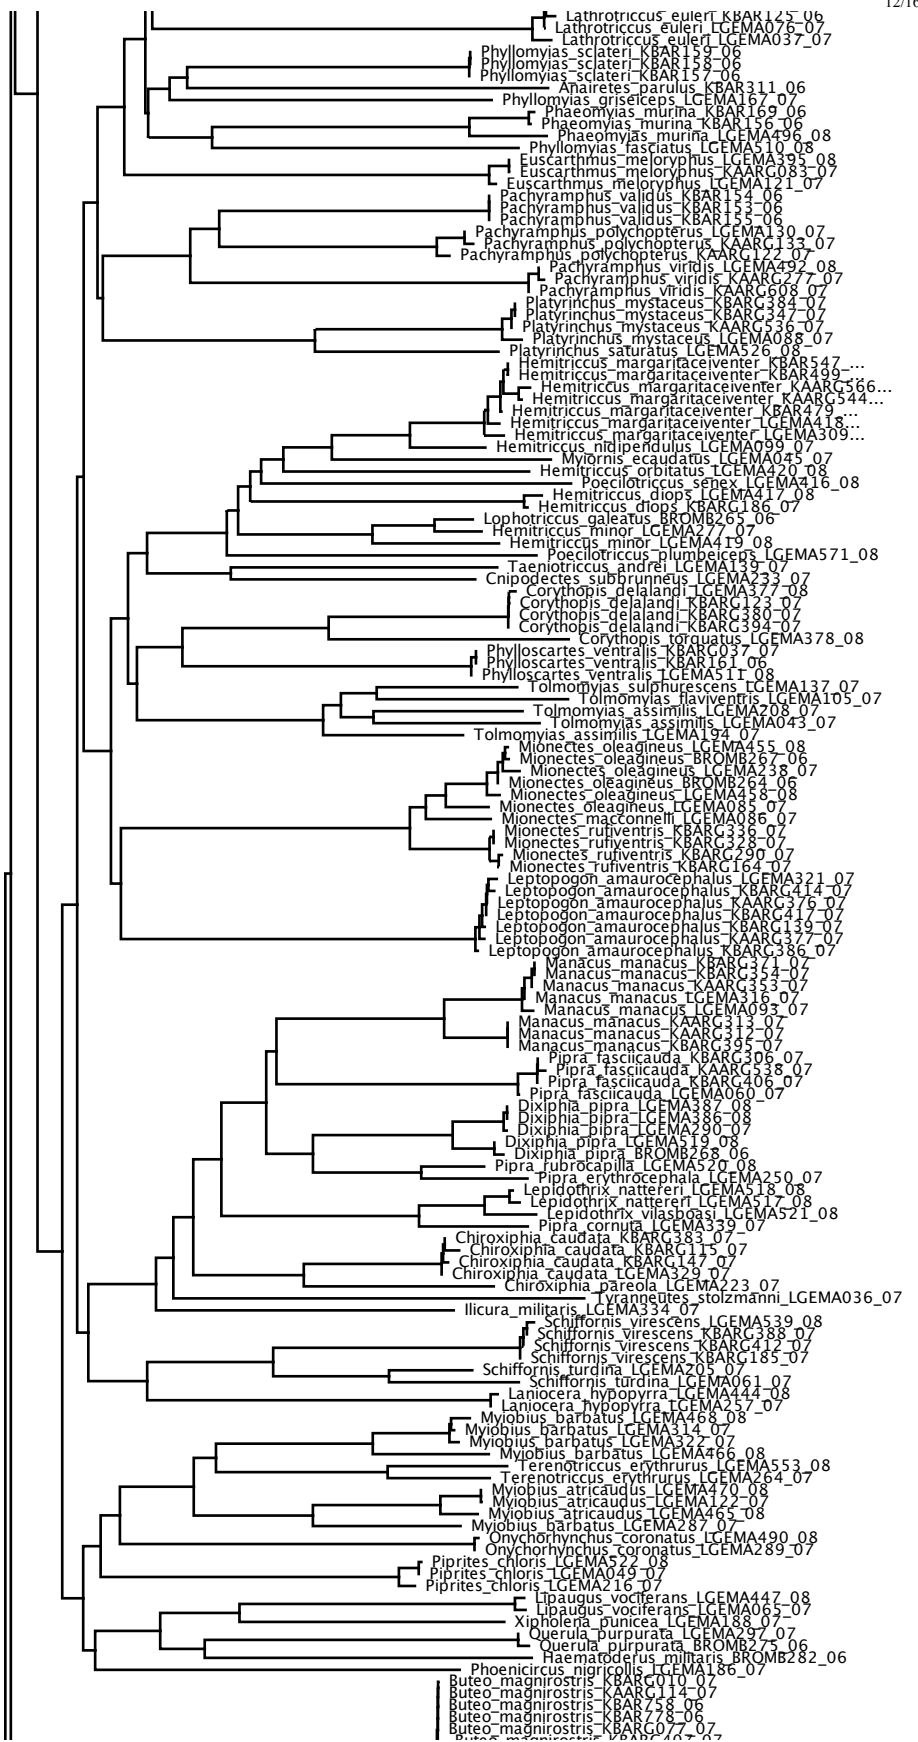

0.01

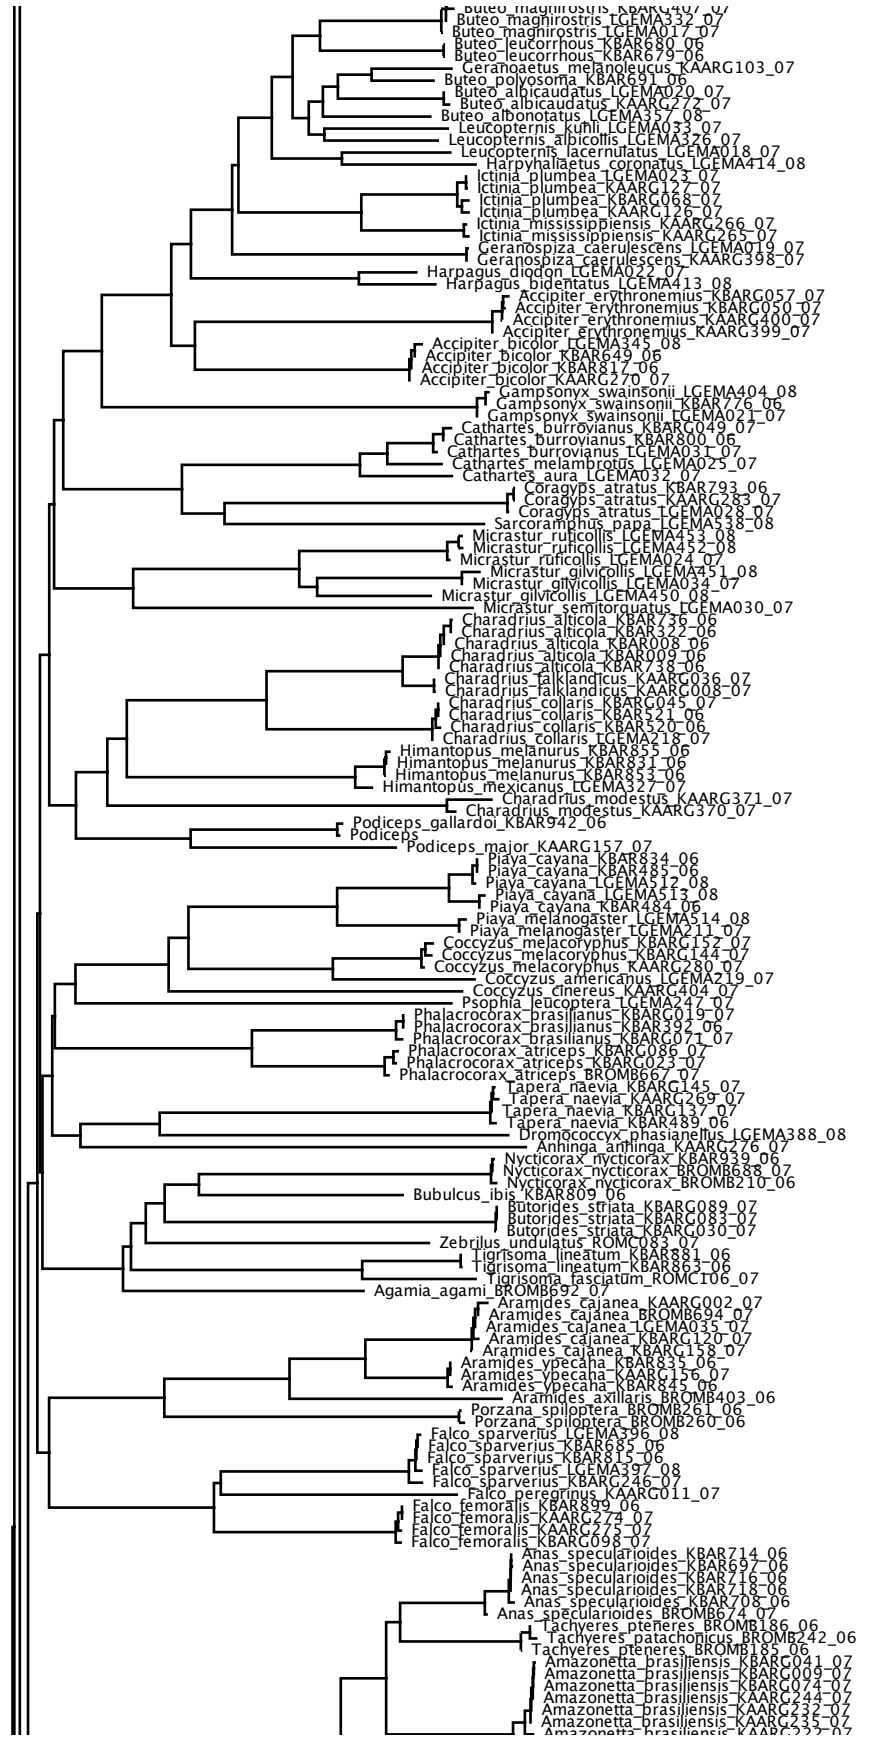



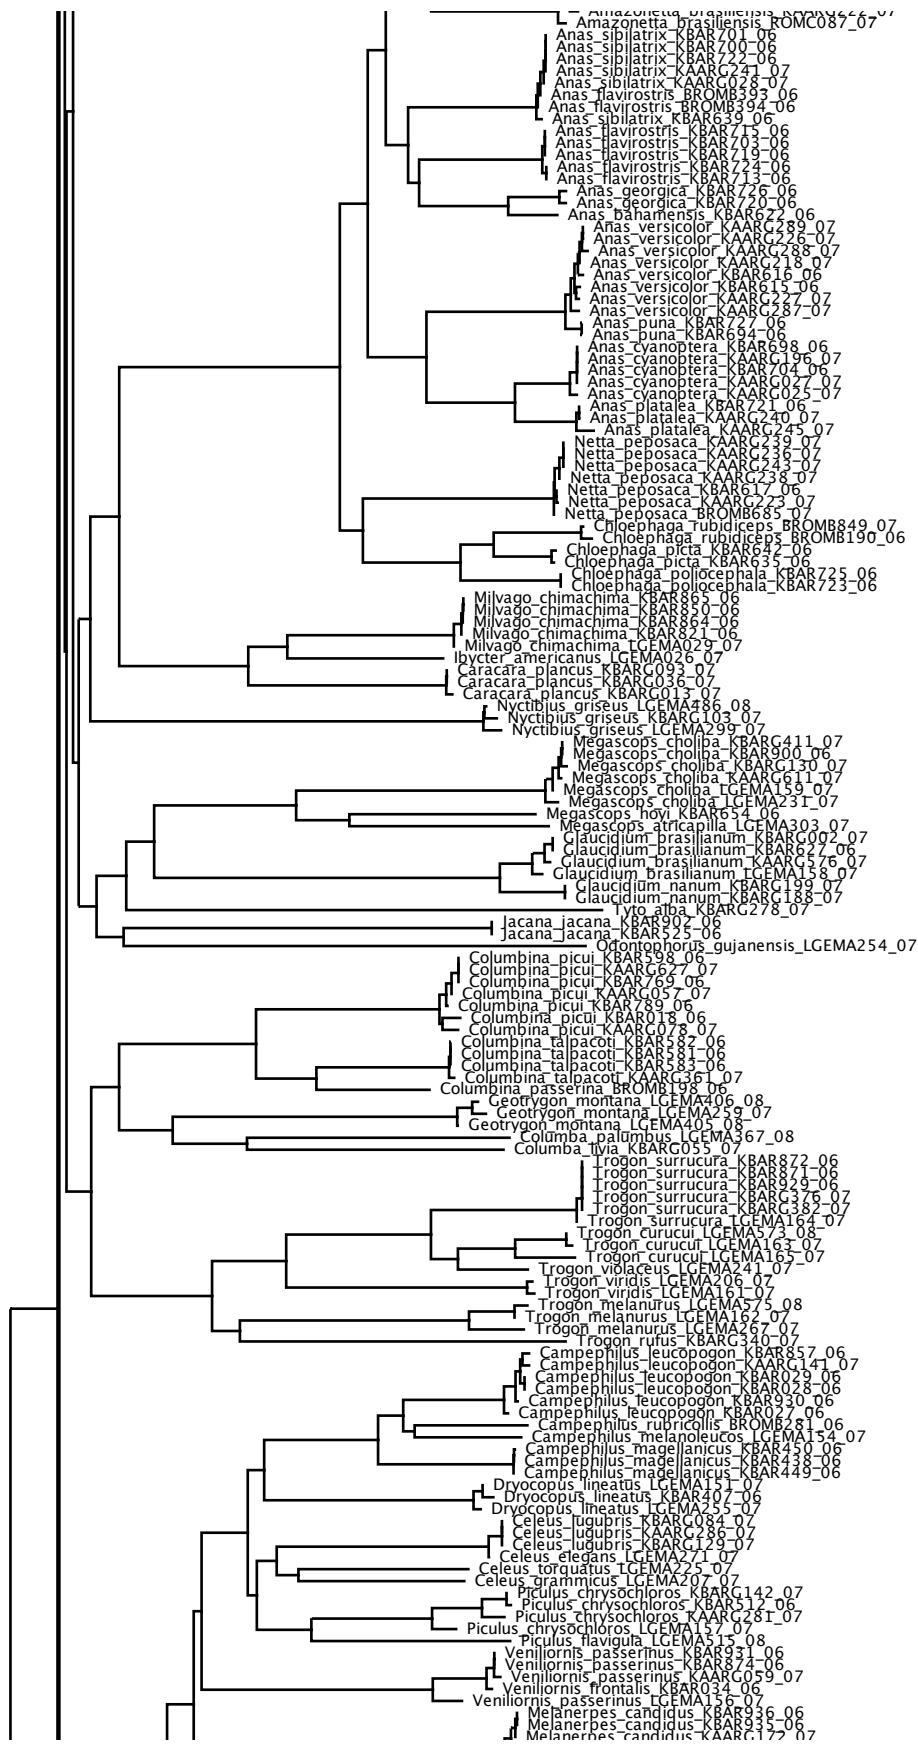

0.01

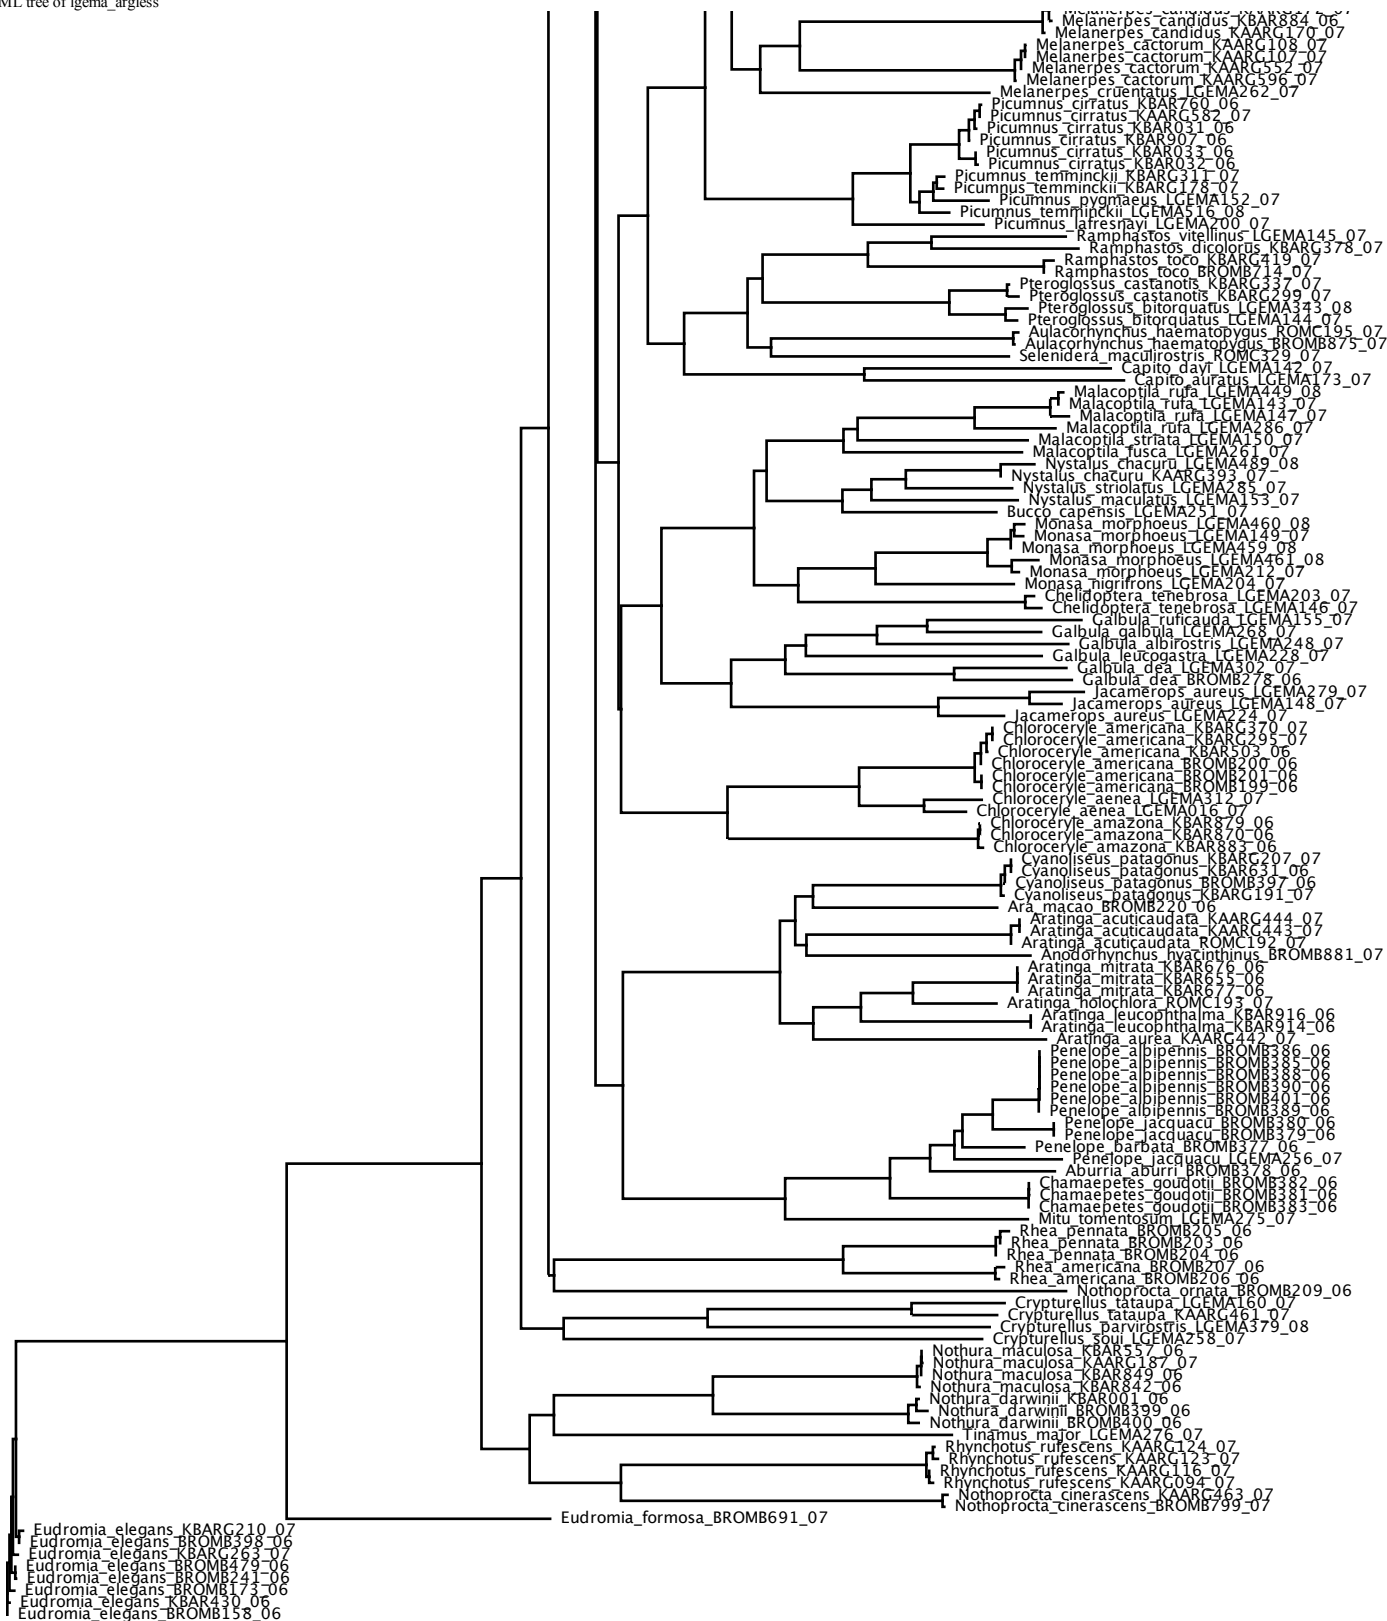

Eudromia elegans KBARG210\_07  
 Eudromia elegans BROMB298\_06  
 Eudromia elegans KBAR6263\_07  
 Eudromia elegans BROMB479\_06  
 Eudromia elegans BROMB241\_06  
 Eudromia elegans BROMB172\_06  
 Eudromia elegans KBAR430\_06  
 Eudromia elegans BROMB158\_06

Eudromia\_formosa\_BROMB691\_07
