# Supplementary material for: DNA Barcode Detects High Genetic Structure within Neotropical Bird Species
Source: PLoS One. 2011 Dec 7;6(12):e28543. doi: 10.1371/journal.pone.0028543 (PMC3233584; doi:10.1371/journal.pone.0028543)
Supplement: Table S2 — Specimen details. List of specimens used in the study, with detailed identification information, and sample locality coordinates (excel file). (XLS) [file pone.0028543.s004.xls]

## Sheet: Lab
Project:	Neotropical			User :	Erika S. Tavares
Created :	19-May-2011
Project Code	Process ID	Sample ID	Field Num	Catalog Num	COI-5P Seq. Length	COI-5P Trace Count	Image Count	Barcode Compliant	GenBank number	Stop Codon	Flagged Record	Collection Date	Identification	Life Stage	Extra Info	Voucher Type	Institution	Notes
BRAS	BROMB378-06	A.aburriB6	A.aburriB6		855[0n]	4	0	Yes	JN801479				Aburria aburri				Royal Ontario Museum
BRAS	LGEMA345-08	LGEMA-363	462		698[0n]	2	0	Yes	JN801480				Accipiter bicolor				Universidade de Sao Paulo, Departamento de Botanica
BRAS	BROMB692-07	DOT 12780	SC 887		746[0n]	2	0	No	JN801481				Agamia agami				American Museum of Natural History, Ornithology Department
BRAS	BROMB162-06	1B-125	SCL G	155923	773[0n]	2	2	Yes	JN801482			22-Feb-1989	Agelaioides badius	A	ssp:badius, Molothrus badius		Royal Ontario Museum	voucher type: skin
BRAS	ROMC107-07	433089	433089		803[0n]	2	0	Yes	JN801483			07-Nov-2001	Aglaeactis cupripennis		caumatonotus		Field Museum of Natural History	voucher: skin
BRAS	ROMC087-07	391043	391043		803[0n]	2	0	No	JN801484				Amazonetta brasiliensis				Field Museum of Natural History	skeleton
BRAS	LGEMA100-07	LGEMA-2429	A0075		729[0n]	2	0	Yes	JN801485				Anabacerthia amaurotis				Universidade de Sao Paulo, Departamento de Botanica
BRAS	BROMB394-06	A.flavirostris 1b	A.flavirostris1b		737[0n]	2	0	Yes	JN801486			29-Apr-2005	Anas flavirostris		ssp: flavirostris		Royal Ontario Museum
BRAS	BROMB393-06	A.flavirostris 1a	A.flavirostris1a		806[0n]	2	0	Yes	JN801487			29-Apr-2005	Anas flavirostris		ssp: flavirostris		Royal Ontario Museum
BRAS	BROMB674-07	DOT 6255	KGM 720		749[0n]	2	0	No	JN801488				Anas specularioides				American Museum of Natural History, Ornithology Department
BRAS	LGEMA347-08	LGEMA-493	970180		671[0n]	2	0	Yes	JN801489				Ancistrops strigilatus				Universidade de Sao Paulo, Departamento de Botanica
BRAS	BROMB881-07	1B-2338	1B-2338	159597	806[0n]	2	2	No	JN801490			03-Feb-1995	Anodorhynchus hyacinthinus	A	captive		Royal Ontario Museum	voucher kind: skin
BRAS	LGEMA011-07	LGEMA-69	254		735[0n]	2	0	Yes	JN801491			25-Jan-2005	Anopetia gounellei				Universidade de Sao Paulo, Departamento de Botanica
BRAS	LGEMA009-07	LGEMA-64	390		735[0n]	2	0	Yes	JN801492			25-Jan-2005	Anthracothorax nigricollis				Universidade de Sao Paulo, Departamento de Botanica
BRAS	BROMB220-06	1B-6	1B-6		875[0n]	2	0	No	JN801493			01-Jan-1989	Ara macao				Royal Ontario Museum
BRAS	BROMB403-06	113953	FS4-25.1.91		766[0n]	2	0	Yes	JN801494			25-Jan-1991	Aramides axillaris				Royal Ontario Museum
BRAS	LGEMA035-07	LGEMA-395	27		734[0n]	2	0	Yes	JN801495				Aramides cajanea				Universidade de Sao Paulo, Departamento de Botanica
BRAS	BROMB694-07	DOT 6197	JJW 336		747[0n]	2	0	No	JN801496				Aramides cajanea				American Museum of Natural History, Ornithology Department
BRAS	ROMC192-07	1B-4290	1B-4290	95568	738[0n]	0	6	No	JN801497			01-Jan-2003	Aratinga acuticaudata	A			Royal Ontario Museum	voucher: skeleton
BRAS	ROMC193-07	1B-4059	1B-4059	91463	684[0n]	1	2	No	JN801498			29-Apr-2003	Aratinga holochlora	A	rubritorquis		Royal Ontario Museum	voucher: skin; skeleton
BRAS	LGEMA072-07	LGEMA-1350	ITA265		725[0n]	2	0	Yes	JN801499				Arremon semitorquatus				Universidade de Sao Paulo, Departamento de Botanica
BRAS	LGEMA349-08	LGEMA-2647	GSC22		713[0n]	2	0	Yes	JN801500				Arremon taciturnus				Universidade de Sao Paulo, Departamento de Botanica
BRAS	LGEMA348-08	LGEMA-535	58		697[0n]	2	0	Yes	JN801501				Arremon taciturnus				Universidade de Sao Paulo, Departamento de Botanica
BRAS	LGEMA301-07	LGEMA-10245	255		734[0n]	2	0	Yes	JN801502				Arremon taciturnus				Universidade de Sao Paulo, Departamento de Botanica
BRAS	LGEMA350-08	LGEMA-3004	A0141		706[0n]	2	0	Yes	JN801503				Arundinicola leucocephala				Universidade de Sao Paulo, Departamento de Botanica
BRAS	ROMC073-07	343218	343218		725[0n]	2	0	Yes	JN801504			11-May-1989	Atthis heloisa		heloisa		Field Museum of Natural History
BRAS	LGEMA226-07	LGEMA-9729	AMZ168		736[0n]	2	0	Yes	JN801505				Attila cinnamomeus				Universidade de Sao Paulo, Departamento de Botanica
BRAS	LGEMA351-08	LGEMA-2436	A0082		738[0n]	2	0	Yes	JN801506				Attila rufus				Universidade de Sao Paulo, Departamento de Botanica
BRAS	ROMC104-07	429941	429941		803[0n]	2	0	Yes	JN801507			11-Apr-2001	Augastes geoffroyi		geoffroyi		Field Museum of Natural History	voucher: skin
BRAS	BROMB875-07	1B-2332	1B-2332	159593	822[0n]	3	0	No	JN801508			10-Aug-1995	Aulacorhynchus haematopygus	A	captive		Royal Ontario Museum	voucher kind: skeleton
BRAS	ROMC195-07	1B-274	1B-274		806[0n]	2	0	No	JN801509				Aulacorhynchus haematopygus	A			Royal Ontario Museum
BRAS	LGEMA352-08	LGEMA-9871		AMZ310	729[0n]	2	0	Yes	JN801510				Automolus infuscatus				Universidade de Sao Paulo, Departamento de Botanica
BRAS	LGEMA265-07	LGEMA-9970	AMZ409		729[0n]	2	0	Yes	JN801511				Automolus ochrolaemus				Universidade de Sao Paulo, Departamento de Botanica
BRAS	ROMC072-07	334368	334368		734[0n]	2	0	Yes	JN801512			30-Oct-2007	Avocettula recurvirostris				Field Museum of Natural History	voucher: skin
BRAS	LGEMA325-07	LGEMA-10429	m17483		666[0n]	2	0	Yes	JN801513			01-Jun-2005	Baryphthengus ruficapillus				Universidade de Sao Paulo, Departamento de Botanica
BRAS	LGEMA354-08	LGEMA-2173	21 ROP		732[0n]	2	0	Yes	JN801514				Basileuterus culicivorus				Universidade de Sao Paulo, Departamento de Botanica
BRAS	LGEMA304-07	LGEMA-10287	MMC195		695[0n]	1	0	No	JN801515				Basileuterus culicivorus				Universidade de Sao Paulo, Departamento de Botanica
BRAS	LGEMA355-08	LGEMA-2768	149		740[0n]	2	0	Yes	JN801516				Basileuterus flaveolus				Universidade de Sao Paulo, Departamento de Botanica
BRAS	LGEMA353-08	LGEMA-506	54		669[0n]	2	0	Yes	JN801517				Basileuterus fulvicauda				Universidade de Sao Paulo, Departamento de Botanica
BRAS	LGEMA308-07	LGEMA-10296	MMC180		693[0n]	1	0	No	JN801518			01-Jan-2005	Basileuterus hypoleucus				Universidade de Sao Paulo, Departamento de Botanica
BRAS	LGEMA356-08	LGEMA-2196	47 ROP		725[0n]	2	0	Yes	JN801519				Basileuterus leucoblepharus				Universidade de Sao Paulo, Departamento de Botanica
BRAS	ROMC103-07	429923	429923		803[0n]	2	0	Yes	JN801520			01-Apr-2001	Boissonneaua matthewsii				Field Museum of Natural History	voucher: skin
BRAS	LGEMA251-07	LGEMA-9877	AMZ316		744[0n]	2	0	Yes	JN801521				Bucco capensis				Universidade de Sao Paulo, Departamento de Botanica
BRAS	LGEMA020-07	LGEMA-304	UU197		733[0n]	2	0	Yes	JN801522				Buteo albicaudatus				Universidade de Sao Paulo, Departamento de Botanica
BRAS	LGEMA357-08	LGEMA-361	425		686[0n]	1	0	No	JN801523				Buteo albonotatus				Universidade de Sao Paulo, Departamento de Botanica
BRAS	LGEMA332-07	LGEMA-357	260		711[0n]	2	0	Yes	JN801524				Buteo magnirostris				Universidade de Sao Paulo, Departamento de Botanica
BRAS	LGEMA017-07	LGEMA-257	ITA263		734[0n]	2	0	Yes	JN801525				Buteo magnirostris				Universidade de Sao Paulo, Departamento de Botanica
BRAS	LGEMA246-07	LGEMA-9851	AMZ290		716[0n]	2	0	Yes	JN801526				Cacicus cela				Universidade de Sao Paulo, Departamento de Botanica
BRAS	LGEMA154-07	LGEMA-3604	129		708[0n]	2	0	Yes	JN801527				Campephilus melanoleucos				Universidade de Sao Paulo, Departamento de Botanica
BRAS	BROMB281-06	3557	3557		700[0n]	1	0	No	JN801528			27-Jul-1994	Campephilus rubricollis	A			Royal Ontario Museum
BRAS	LGEMA360-08	LGEMA-20	85		706[8n]	0	0	No	JN801529				Campylopterus largipennis				Universidade de Sao Paulo, Departamento de Botanica
BRAS	ROMC090-07	392351	392351		803[0n]	2	0	Yes	JN801530			01-Jan-1999	Campylopterus macrourus		simoni, Eupetomena macroura		Field Museum of Natural History	voucher deposited at Universidad Federal de Pernambuco
BRAS	LGEMA128-07	LGEMA-2992	A0123		733[0n]	2	0	Yes	JN801531				Campylorhamphus falcularius				Universidade de Sao Paulo, Departamento de Botanica
BRAS	LGEMA042-07	LGEMA-430	970264		723[0n]	2	0	Yes	JN801532				Campylorhamphus procurvoides				Universidade de Sao Paulo, Departamento de Botanica
BRAS	LGEMA337-07	LGEMA-2746	118		731[0n]	2	0	Yes	JN801533				Campylorhamphus trochilirostris				Universidade de Sao Paulo, Departamento de Botanica
BRAS	LGEMA173-07	LGEMA-9575	AMZ014		751[0n]	2	0	Yes	JN801534				Capito auratus				Universidade de Sao Paulo, Departamento de Botanica
BRAS	LGEMA142-07	LGEMA-3289	970268		731[0n]	2	0	Yes	JN801535				Capito dayi				Universidade de Sao Paulo, Departamento de Botanica
BRAS	LGEMA014-07	LGEMA-104	202		750[0n]	0	0	No	JN801536			25-Jan-2005	Caprimulgus longirostris				Universidade de Sao Paulo, Departamento de Botanica
BRAS	LGEMA187-07	LGEMA-9613	AMZ052		743[0n]	2	0	Yes	JN801537				Caprimulgus nigrescens				Universidade de Sao Paulo, Departamento de Botanica
BRAS	BROMB277-06	3515	3515		812[0n]	1	0	No	JN801538			21-Jul-1994	Caprimulgus nigrescens				Royal Ontario Museum
BRAS	LGEMA013-07	LGEMA-99	371		725[0n]	2	0	Yes	JN801539			25-Jan-2005	Caprimulgus parvulus				Universidade de Sao Paulo, Departamento de Botanica
BRAS	LGEMA362-08	LGEMA-101	188		680[0n]	2	0	Yes	JN801540				Caprimulgus rufus				Universidade de Sao Paulo, Departamento de Botanica
BRAS	BROMB223-06	1B-931	1B-931	157406	785[0n]	2	3	Yes	JN801541				Carduelis barbata	A			Royal Ontario Museum	voucher kind: Skeleton
BRAS	LGEMA119-07	LGEMA-2771	152		727[0n]	2	0	Yes	JN801542				Casiornis fuscus				Universidade de Sao Paulo, Departamento de Botanica
BRAS	LGEMA059-07	LGEMA-526	25		770[0n]	2	0	Yes	JN801543				Casiornis rufus				Universidade de Sao Paulo, Departamento de Botanica
BRAS	LGEMA032-07	LGEMA-362	438		735[0n]	2	0	Yes	JN801544				Cathartes aura				Universidade de Sao Paulo, Departamento de Botanica
BRAS	LGEMA031-07	LGEMA-359	392		736[0n]	2	0	Yes	JN801545				Cathartes burrovianus				Universidade de Sao Paulo, Departamento de Botanica
BRAS	LGEMA025-07	LGEMA-347	259		755[0n]	2	0	Yes	JN801546				Cathartes melambrotus				Universidade de Sao Paulo, Departamento de Botanica
BRAS	LGEMA271-07	LGEMA-10001	AMZ440		729[0n]	2	0	Yes	JN801547				Celeus elegans				Universidade de Sao Paulo, Departamento de Botanica
BRAS	LGEMA207-07	LGEMA-9650	AMZ089		711[0n]	2	0	Yes	JN801548				Celeus grammicus				Universidade de Sao Paulo, Departamento de Botanica
BRAS	LGEMA225-07	LGEMA-9727	AMZ166		730[0n]	2	0	Yes	JN801549				Celeus torquatus				Universidade de Sao Paulo, Departamento de Botanica
BRAS	LGEMA135-07	LGEMA-3253		MZUSP-76533	733[0n]	2	0	Yes	JN801550				Cercomacra laeta				Universidade de Sao Paulo, Departamento de Botanica	Skin
BRAS	LGEMA340-07	LGEMA-3003	A0140		744[0n]	2	0	Yes	JN801551				Certhiaxis cinnamomeus				Universidade de Sao Paulo, Departamento de Botanica
BRAS	BROMB383-06	C.guodottiB11	C.guodottiB11		857[0n]	2	0	Yes	JN801552				Chamaepetes goudotii				Royal Ontario Museum
BRAS	BROMB382-06	C.guodottiB10	C.guodottiB10		730[0n]	2	0	Yes	JN801553				Chamaepetes goudotii				Royal Ontario Museum
BRAS	BROMB381-06	C.guodottiB9	C.guodottiB9		741[0n]	2	0	Yes	JN801554				Chamaepetes goudotii				Royal Ontario Museum
BRAS	LGEMA336-07	LGEMA-1183	ITA212		731[0n]	2	0	Yes	JN801555				Chamaeza meruloides				Universidade de Sao Paulo, Departamento de Botanica
BRAS	LGEMA218-07	LGEMA-9691	AMZ130		746[0n]	3	0	Yes	JN801556				Charadrius collaris				Universidade de Sao Paulo, Departamento de Botanica
BRAS	LGEMA203-07	LGEMA-9641	AMZ080		752[0n]	2	0	Yes	JN801557				Chelidoptera tenebrosa				Universidade de Sao Paulo, Departamento de Botanica
BRAS	LGEMA146-07	LGEMA-3298	27		752[0n]	2	0	Yes	JN801558				Chelidoptera tenebrosa				Universidade de Sao Paulo, Departamento de Botanica
BRAS	LGEMA329-07	LGEMA-2085	50045		740[0n]	0	0	No	JN801559				Chiroxiphia caudata				Universidade de Sao Paulo, Departamento de Botanica
BRAS	LGEMA223-07	LGEMA-9718	AMZ157		702[0n]	2	0	Yes	JN801560				Chiroxiphia pareola				Universidade de Sao Paulo, Departamento de Botanica
BRAS	BROMB190-06	RHGE2	RHGE2		730[0n]	2	0	Yes	JN801561			01-Jan-2000	Chloephaga rubidiceps				Royal Ontario Museum
BRAS	BROMB849-07	RHGE1	RHGE1		759[0n]	2	0	Yes	JN801562			01-Jan-2001	Chloephaga rubidiceps				Royal Ontario Museum
BRAS	LGEMA312-07	LGEMA-10319	A0149		710[0n]	2	0	Yes	JN801563			06-Nov-2006	Chloroceryle aenea				Universidade de Sao Paulo, Departamento de Botanica
BRAS	LGEMA016-07	LGEMA-187		skin: 970302	735[0n]	2	0	Yes	JN801564				Chloroceryle aenea				Universidade de Sao Paulo, Departamento de Botanica
BRAS	BROMB201-06	G13855	G13855		877[0n]	2	0	Yes	JN801565			16-Apr-1997	Chloroceryle americana	A			Royal Ontario Museum	second year
BRAS	BROMB200-06	G13853	G13853		739[0n]	2	0	Yes	JN801566			16-Apr-1997	Chloroceryle americana	A			Royal Ontario Museum	after second year
BRAS	BROMB199-06	GRKING	GRKING		878[0n]	2	0	Yes	JN801567			14-Apr-1997	Chloroceryle americana				Royal Ontario Museum
BRAS	LGEMA171-07	LGEMA-9571	AMZ010		736[0n]	2	0	Yes	JN801568				Chlorophanes spiza				Universidade de Sao Paulo, Departamento de Botanica
BRAS	ROMC096-07	396025	396025		801[0n]	2	0	Yes	JN801569				Chlorostilbon notatus		cycnogenys		Field Museum of Natural History
BRAS	LGEMA229-07	LGEMA-9753	AMZ192		737[0n]	2	0	Yes	JN801570				Chordeiles acutipennis				Universidade de Sao Paulo, Departamento de Botanica
BRAS	ROMC091-07	392803	392803		789[0n]	2	0	Yes	JN801571			01-Jan-1999	Chrysolampis mosquitus				Field Museum of Natural History	voucher deposited at Universidad Federal de Pernambuco
BRAS	LGEMA364-08	LGEMA-60	506		706[0n]	3	0	Yes	JN801572				Chrysolampis mosquitus				Universidade de Sao Paulo, Departamento de Botanica
BRAS	ROMC069-07	320805	320805		711[0n]	1	0	No	JN801573			17-Nov-1985	Chrysuronia oenone		josephinae		Field Museum of Natural History	voucher: skin
BRAS	ROMC230-07	C.fusc11	C.fusc11		740[0n]	0	0	No	JN801574			31-Mar-2005	Cinclodes fuscus		patagonica		Royal Ontario Museum
BRAS	BROMB154-06	AJB 4395	AJB 4395	149779	734[0n]	1	2	No	JN801575			24-Nov-1984	Cinclodes fuscus	A	ssp:fuscus		Royal Ontario Museum	voucher type: skin, skeleton
BRAS	ROMC094-07	395405	395405		753[0n]	0	0	No	JN801576			29-Jun-1991	Clytolaema rubricauda				Field Museum of Natural History	skeleton
BRAS	LGEMA008-07	LGEMA-59	A0010		707[0n]	3	0	Yes	JN801577				Clytolaema rubricauda				Universidade de Sao Paulo, Departamento de Botanica
BRAS	LGEMA365-08	LGEMA-523	7		689[3n]	2	0	Yes	JN801578				Cnemotriccus fuscatus				Universidade de Sao Paulo, Departamento de Botanica
BRAS	LGEMA233-07	LGEMA-9769	AMZ208		743[0n]	2	0	Yes	JN801579				Cnipodectes subbrunneus				Universidade de Sao Paulo, Departamento de Botanica
BRAS	LGEMA219-07	LGEMA-9693	AMZ132		738[0n]	2	0	Yes	JN801580				Coccyzus americanus				Universidade de Sao Paulo, Departamento de Botanica
BRAS	LGEMA109-07	LGEMA-2724	49		731[0n]	2	0	Yes	JN801581				Coereba flaveola				Universidade de Sao Paulo, Departamento de Botanica
BRAS	LGEMA367-08	LGEMA-174	B35617		703[2n]	2	0	Yes	JN801582				Columba palumbus				Universidade de Sao Paulo, Departamento de Botanica
BRAS	BROMB198-06	DOVE1	DOVE1		838[0n]	2	0	Yes	JN801583			14-Apr-1997	Columbina passerina				Royal Ontario Museum
BRAS	LGEMA359-08	LGEMA-2830	261		716[0n]	2	0	Yes	JN801584				Compsothraupis loricata				Universidade de Sao Paulo, Departamento de Botanica
BRAS	LGEMA126-07	LGEMA-2847	287		752[0n]	2	0	Yes	JN801585				Compsothraupis loricata				Universidade de Sao Paulo, Departamento de Botanica
BRAS	LGEMA320-07	LGEMA-10337	A0171		721[0n]	2	0	Yes	JN801586			06-Nov-2006	Conirostrum bicolor				Universidade de Sao Paulo, Departamento de Botanica
BRAS	LGEMA070-07	LGEMA-1302	II A058		746[0n]	2	0	Yes	JN801587				Conirostrum speciosum				Universidade de Sao Paulo, Departamento de Botanica
BRAS	LGEMA369-08	LGEMA-2107	LGEMA-2107		689[0n]	2	0	Yes	JN801588				Conopophaga aurita				Universidade de Sao Paulo, Departamento de Botanica
BRAS	LGEMA178-07	LGEMA-9588	AMZ027		716[0n]	4	0	Yes	JN801589				Conopophaga aurita				Universidade de Sao Paulo, Departamento de Botanica
BRAS	LGEMA048-07	LGEMA-467	970018		733[0n]	2	0	Yes	JN801590				Conopophaga aurita				Universidade de Sao Paulo, Departamento de Botanica
BRAS	LGEMA371-08	LGEMA-2658	GSC38		719[0n]	2	0	Yes	JN801591				Conopophaga lineata				Universidade de Sao Paulo, Departamento de Botanica
BRAS	LGEMA370-08	LGEMA-2049	50008		702[0n]	2	0	Yes	JN801592				Conopophaga lineata				Universidade de Sao Paulo, Departamento de Botanica
BRAS	LGEMA323-07	LGEMA-10365	GSC99		739[0n]	2	0	Yes	JN801593				Conopophaga lineata				Universidade de Sao Paulo, Departamento de Botanica
BRAS	LGEMA376-08	LGEMA-10318	A0148		706[0n]	2	0	Yes	JN801594				Conopophaga melanops				Universidade de Sao Paulo, Departamento de Botanica
BRAS	LGEMA374-08	LGEMA-1756	7 ROP		700[0n]	2	0	Yes	JN801595				Conopophaga melanops				Universidade de Sao Paulo, Departamento de Botanica
BRAS	LGEMA373-08	LGEMA-1713	4 ROP		698[0n]	2	0	Yes	JN801596				Conopophaga melanops				Universidade de Sao Paulo, Departamento de Botanica
BRAS	LGEMA372-08	LGEMA-1613	23		642[0n]	2	0	Yes	JN801597				Conopophaga melanops				Universidade de Sao Paulo, Departamento de Botanica
BRAS	LGEMA095-07	LGEMA-2105	ML99		761[0n]	3	0	Yes	JN801598				Conopophaga melanops				Universidade de Sao Paulo, Departamento de Botanica
BRAS	LGEMA080-07	LGEMA-1528	LGEMA-1528		730[0n]	2	0	Yes	JN801599				Conopophaga melanops				Universidade de Sao Paulo, Departamento de Botanica
BRAS	LGEMA084-07	LGEMA-1641	131		753[0n]	2	0	Yes	JN801600				Conopophaga roberti				Universidade de Sao Paulo, Departamento de Botanica
BRAS	LGEMA083-07	LGEMA-1639	188		750[0n]	2	0	Yes	JN801601				Conopophaga roberti				Universidade de Sao Paulo, Departamento de Botanica
BRAS	LGEMA028-07	LGEMA-353	217		754[0n]	2	0	Yes	JN801602				Coragyps atratus				Universidade de Sao Paulo, Departamento de Botanica
BRAS	LGEMA114-07	LGEMA-2750	122		707[0n]	2	0	Yes	JN801603				Coryphospingus pileatus				Universidade de Sao Paulo, Departamento de Botanica
BRAS	LGEMA377-08	LGEMA-2368	16		717[0n]	2	0	Yes	JN801604				Corythopis delalandi				Universidade de Sao Paulo, Departamento de Botanica
BRAS	LGEMA378-08	LGEMA-410	19		709[0n]	2	0	Yes	JN801605				Corythopis torquatus				Universidade de Sao Paulo, Departamento de Botanica
BRAS	LGEMA379-08	LGEMA-9548	541		707[0n]	2	0	Yes	JN801606				Crypturellus parvirostris				Universidade de Sao Paulo, Departamento de Botanica
BRAS	LGEMA258-07	LGEMA-9907	AMZ346		727[0n]	2	0	Yes	JN801607				Crypturellus soui soui				Universidade de Sao Paulo, Departamento de Botanica
BRAS	LGEMA160-07	LGEMA-9549	400		721[0n]	2	0	Yes	JN801608				Crypturellus tataupa				Universidade de Sao Paulo, Departamento de Botanica
BRAS	LGEMA232-07	LGEMA-9766	AMZ205		718[0n]	2	0	Yes	JN801609				Cyanerpes caeruleus				Universidade de Sao Paulo, Departamento de Botanica
BRAS	LGEMA341-07	LGEMA-9767	AMZ206		730[0n]	2	0	Yes	JN801610				Cyanerpes nitidus				Universidade de Sao Paulo, Departamento de Botanica
BRAS	LGEMA111-07	LGEMA-2741	110		754[1n]	2	0	Yes	JN801611				Cyanocompsa brissonii				Universidade de Sao Paulo, Departamento de Botanica
BRAS	LGEMA296-07	LGEMA-10223	231		758[0n]	0	0	No	JN801612				Cyanocompsa cyanoides		Originally identified as Passerina cyanoides		Universidade de Sao Paulo, Departamento de Botanica
BRAS	LGEMA381-08	LGEMA-483	970182		642[0n]	2	0	Yes	JN801613				Cyanocompsa cyanoides				Universidade de Sao Paulo, Departamento de Botanica
BRAS	LGEMA087-07	LGEMA-1649	LGEMA-1649		735[0n]	2	0	Yes	JN801614				Cyanocorax chrysops				Universidade de Sao Paulo, Departamento de Botanica
BRAS	LGEMA382-08	LGEMA-2702	18		721[0n]	2	0	Yes	JN801615				Cyanocorax cyanopogon				Universidade de Sao Paulo, Departamento de Botanica
BRAS	BROMB397-06	C.patagonus 5	C.patagonus5		814[0n]	2	0	Yes	JN801616			29-Apr-2005	Cyanoliseus patagonus		ssp: maculosa		Royal Ontario Museum
BRAS	LGEMA120-07	LGEMA-2774	155		750[0n]	2	0	Yes	JN801617				Cyclarhis gujanensis				Universidade de Sao Paulo, Departamento de Botanica
BRAS	LGEMA213-07	LGEMA-9669	AMZ108		703[0n]	2	0	Yes	JN801618				Cymbilaimus lineatus				Universidade de Sao Paulo, Departamento de Botanica
BRAS	LGEMA054-07	LGEMA-487	970174		624[0n]	1	0	No	JN801619				Cyphorhinus arada				Universidade de Sao Paulo, Departamento de Botanica
BRAS	LGEMA239-07	LGEMA-9810	AMZ249		746[0n]	2	0	Yes	JN801620				Cyphorhinus arada				Universidade de Sao Paulo, Departamento de Botanica
BRAS	LGEMA383-08	LGEMA-9684		AMZ123	664[0n]	1	0	No	JN801621				Dacnis cayana				Universidade de Sao Paulo, Departamento de Botanica
BRAS	LGEMA071-07	LGEMA-1305	II A063		752[0n]	2	0	Yes	JN801622				Dacnis cayana				Universidade de Sao Paulo, Departamento de Botanica
BRAS	LGEMA384-08	LGEMA-9721		AMZ160	658[0n]	2	0	Yes	JN801623				Deconychura longicauda				Universidade de Sao Paulo, Departamento de Botanica
BRAS	LGEMA333-07	LGEMA-428	970092		771[0n]	2	0	Yes	JN801624				Deconychura longicauda				Universidade de Sao Paulo, Departamento de Botanica
BRAS	LGEMA385-08	LGEMA-595	53		672[0n]	2	0	Yes	JN801625				Deconychura stictolaema				Universidade de Sao Paulo, Departamento de Botanica
BRAS	LGEMA235-07	LGEMA-9789	AMZ228		739[0n]	2	0	Yes	JN801626				Deconychura stictolaema				Universidade de Sao Paulo, Departamento de Botanica
BRAS	LGEMA252-07	LGEMA-9881	AMZ320		729[0n]	2	0	Yes	JN801627				Dendrocincla fuliginosa				Universidade de Sao Paulo, Departamento de Botanica
BRAS	LGEMA136-07	LGEMA-3255		MZUSP-76552	730[0n]	2	0	Yes	JN801628				Dendrocincla fuliginosa				Universidade de Sao Paulo, Departamento de Botanica	Skin
BRAS	BROMB262-06	3485	3485		829[0n]	2	0	Yes	JN801629			17-Jul-1994	Dendrocincla fuliginosa	A			Royal Ontario Museum
BRAS	LGEMA134-07	LGEMA-3247		MZUSP-76543	606[0n]	2	0	Yes	JN801630				Dendrocincla fuliginosa				Universidade de Sao Paulo, Departamento de Botanica	Skin
BRAS	LGEMA193-07	LGEMA-9621	AMZ060		737[0n]	2	0	Yes	JN801631				Dendrocincla merula				Universidade de Sao Paulo, Departamento de Botanica
BRAS	LGEMA313-07	LGEMA-10321	A0151		731[0n]	2	0	Yes	JN801632			06-Nov-2006	Dendrocincla turdina				Universidade de Sao Paulo, Departamento de Botanica
BRAS	LGEMA236-07	LGEMA-9791	AMZ230		731[0n]	2	0	Yes	JN801633				Dendrocolaptes certhia				Universidade de Sao Paulo, Departamento de Botanica
BRAS	LGEMA038-07	LGEMA-407	15		734[0n]	2	0	Yes	JN801634				Dendroplex picus				Universidade de Sao Paulo, Departamento de Botanica
BRAS	LGEMA519-08	LGEMA-9567		AMZ006	611[0n]	2	0	Yes	JN801635				Dixiphia pipra				Universidade de Sao Paulo, Departamento de Botanica
BRAS	LGEMA387-08	LGEMA-10208	216		716[0n]	2	0	Yes	JN801636				Dixiphia pipra				Universidade de Sao Paulo, Departamento de Botanica
BRAS	LGEMA386-08	LGEMA-10199	207		716[0n]	2	0	Yes	JN801637				Dixiphia pipra				Universidade de Sao Paulo, Departamento de Botanica
BRAS	LGEMA290-07	LGEMA-10200	208		741[0n]	0	0	No	JN801638				Dixiphia pipra				Universidade de Sao Paulo, Departamento de Botanica
BRAS	BROMB268-06	3494	3494		893[0n]	2	0	Yes	JN801639			18-Jul-1994	Dixiphia pipra	A	ssp pipra, Pipra pipra		Royal Ontario Museum
BRAS	LGEMA388-08	LGEMA-218	422		705[0n]	1	0	No	JN801640				Dromococcyx phasianellus				Universidade de Sao Paulo, Departamento de Botanica
BRAS	LGEMA389-08	LGEMA-2411	A0054		719[0n]	2	0	Yes	JN801641				Drymophila ferruginea				Universidade de Sao Paulo, Departamento de Botanica
BRAS	LGEMA390-08	LGEMA-1162	ITA190		701[0n]	2	0	Yes	JN801642				Drymophila malura				Universidade de Sao Paulo, Departamento de Botanica
BRAS	LGEMA307-07	LGEMA-10294	MMC33		722[0n]	2	0	Yes	JN801643			16-Mar-2005	Drymophila ochropyga				Universidade de Sao Paulo, Departamento de Botanica
BRAS	LGEMA391-08	LGEMA-10330	A0161		696[0n]	2	0	Yes	JN801644				Drymophila squamata				Universidade de Sao Paulo, Departamento de Botanica
BRAS	LGEMA255-07	LGEMA-9899	AMZ338		738[0n]	2	0	Yes	JN801645				Dryocopus lineatus				Universidade de Sao Paulo, Departamento de Botanica
BRAS	LGEMA151-07	LGEMA-3547	LGEMA-3547		744[0n]	2	0	Yes	JN801646				Dryocopus lineatus				Universidade de Sao Paulo, Departamento de Botanica
BRAS	LGEMA306-07	LGEMA-10292	MMC38		733[0n]	2	0	Yes	JN801647			17-Mar-2005	Dysithamnus mentalis				Universidade de Sao Paulo, Departamento de Botanica
BRAS	LGEMA067-07	LGEMA-1067	IT89		701[0n]	2	0	Yes	JN801648				Dysithamnus mentalis				Universidade de Sao Paulo, Departamento de Botanica
BRAS	ROMC111-07	433223	433223		803[0n]	2	0	Yes	JN801649			07-Nov-2001	Ensifera ensifera				Field Museum of Natural History	voucher: skin
BRAS	BROMB398-06	E.elegans 6	E.elegans6		819[0n]	2	0	Yes	JN801650			01-May-2005	Eudromia elegans		ssp: elegans		Royal Ontario Museum
BRAS	BROMB241-06	1B-4454	1B-4454	101564	745[0n]	2	3	Yes	JN801651			05-Dec-1984	Eudromia elegans	A	ssp elegans		Royal Ontario Museum	voucher kind: Skeleton; wing
BRAS	BROMB173-06	AJB 4467	AJB 4467		822[0n]	2	0	Yes	JN801652			01-Dec-1984	Eudromia elegans	A	ssp:patagonica		Royal Ontario Museum
BRAS	BROMB158-06	AJB 4468	AJB 4468		807[0n]	1	0	No	JN801653			01-Dec-1984	Eudromia elegans	A	ssp:patagonica		Royal Ontario Museum
BRAS	BROMB479-06	AJB 4469	AJB 4469		804[0n]	3	0	Yes	JN801654			01-Dec-1984	Eudromia elegans		ssp: patagonica		Royal Ontario Museum
BRAS	BROMB691-07	DOT 12688	SBB 39		755[0n]	0	0	No	JN801655				Eudromia formosa				American Museum of Natural History, Ornithology Department
BRAS	LGEMA104-07	LGEMA-2689	428		749[0n]	2	0	Yes	JN801656				Euphonia chlorotica				Universidade de Sao Paulo, Departamento de Botanica
BRAS	LGEMA050-07	LGEMA-479	970066		730[0n]	2	0	Yes	JN801657				Euphonia rufiventris				Universidade de Sao Paulo, Departamento de Botanica
BRAS	LGEMA395-08	LGEMA-524	17		697[0n]	2	0	Yes	JN801658				Euscarthmus meloryphus				Universidade de Sao Paulo, Departamento de Botanica
BRAS	LGEMA121-07	LGEMA-2801	203		738[0n]	2	0	Yes	JN801659				Euscarthmus meloryphus				Universidade de Sao Paulo, Departamento de Botanica
BRAS	LGEMA397-08	LGEMA-369	A0145		704[0n]	2	0	Yes	JN801660				Falco sparverius				Universidade de Sao Paulo, Departamento de Botanica
BRAS	LGEMA396-08	LGEMA-355	330		710[0n]	2	0	Yes	JN801661				Falco sparverius				Universidade de Sao Paulo, Departamento de Botanica
BRAS	ROMC102-07	399146	399146		801[0n]	2	0	Yes	JN801662				Florisuga fuscus				Field Museum of Natural History	voucher at Universidade Pernambuco
BRAS	LGEMA398-08	LGEMA-54	A0043		702[19n]	0	0	No	JN801663				Florisuga fuscus				Universidade de Sao Paulo, Departamento de Botanica
BRAS	LGEMA280-07	LGEMA-10153	158		731[0n]	2	0	Yes	JN801664				Formicarius analis		Originally identified as Formicivora analis		Universidade de Sao Paulo, Departamento de Botanica
BRAS	LGEMA399-08	LGEMA-9700		AMZ139	706[0n]	2	0	Yes	JN801665				Formicarius colma				Universidade de Sao Paulo, Departamento de Botanica
BRAS	LGEMA283-07	LGEMA-10174	181	LGEMA-10174	734[0n]	6	0	Yes	JN801666				Formicarius colma				Universidade de Sao Paulo, Departamento de Botanica	Delete two traces files
BRAS	LGEMA400-08	LGEMA-513	20		697[0n]	2	0	Yes	JN801667				Formicivora grisea				Universidade de Sao Paulo, Departamento de Botanica
BRAS	LGEMA305-07	LGEMA-10290	MMC141		703[0n]	2	0	Yes	JN801668				Formicivora grisea				Universidade de Sao Paulo, Departamento de Botanica
BRAS	LGEMA401-08	LGEMA-2764	141		735[8n]	2	0	No	JN801669				Formicivora melanogaster				Universidade de Sao Paulo, Departamento de Botanica
BRAS	LGEMA402-08	LGEMA-511	14		651[0n]	1	0	No	JN801670				Formicivora rufa				Universidade de Sao Paulo, Departamento de Botanica
BRAS	LGEMA266-07	LGEMA-9972	AMZ411		734[0n]	2	0	Yes	JN801671				Frederickena viridis				Universidade de Sao Paulo, Departamento de Botanica
BRAS	BROMB270-06	3500	3500		851[0n]	1	0	No	JN801672			19-Jul-1994	Frederickena viridis	A			Royal Ontario Museum
BRAS	LGEMA248-07	LGEMA-9864	AMZ303		739[0n]	2	0	Yes	JN801673				Galbula albirostris				Universidade de Sao Paulo, Departamento de Botanica
BRAS	LGEMA302-07	LGEMA-10246	256		739[0n]	2	0	Yes	JN801674				Galbula dea				Universidade de Sao Paulo, Departamento de Botanica
BRAS	BROMB278-06	3523	3523		725[0n]	2	0	Yes	JN801675			23-Jul-1994	Galbula dea	A			Royal Ontario Museum
BRAS	LGEMA268-07	LGEMA-9980	AMZ419		763[0n]	0	0	No	JN801676				Galbula galbula				Universidade de Sao Paulo, Departamento de Botanica
BRAS	LGEMA228-07	LGEMA-9751	AMZ190		742[0n]	2	0	Yes	JN801677				Galbula leucogastra				Universidade de Sao Paulo, Departamento de Botanica
BRAS	LGEMA155-07	LGEMA-3607	145		737[0n]	2	0	Yes	JN801678				Galbula ruficauda				Universidade de Sao Paulo, Departamento de Botanica
BRAS	LGEMA404-08	LGEMA-366	111		702[0n]	2	0	Yes	JN801679				Gampsonyx swainsonii				Universidade de Sao Paulo, Departamento de Botanica
BRAS	LGEMA021-07	LGEMA-305	Conf. 211		735[0n]	1	0	No	JN801680				Gampsonyx swainsonii				Universidade de Sao Paulo, Departamento de Botanica
BRAS	BROMB160-06	1B-124	SCL F	155922	791[0n]	2	2	Yes	JN801681			10-Oct-1988	Geothlypis aequinoctialis	A	ssp:velata		Royal Ontario Museum	voucher type: skin
BRAS	LGEMA406-08	LGEMA-10283	MMC73		714[0n]	2	0	Yes	JN801682				Geotrygon montana				Universidade de Sao Paulo, Departamento de Botanica
BRAS	LGEMA405-08	LGEMA-173		MZUSP 970278	624[0n]	2	0	Yes	JN801683				Geotrygon montana				Universidade de Sao Paulo, Departamento de Botanica
BRAS	LGEMA259-07	LGEMA-9908	AMZ347		755[0n]	2	0	Yes	JN801684				Geotrygon montana				Universidade de Sao Paulo, Departamento de Botanica
BRAS	LGEMA019-07	LGEMA-303	UU390		699[0n]	2	0	Yes	JN801685				Geranospiza caerulescens				Universidade de Sao Paulo, Departamento de Botanica
BRAS	LGEMA158-07	LGEMA-9529	297		736[0n]	1	0	No	JN801686			25-Jan-2005	Glaucidium brasilianum				Universidade de Sao Paulo, Departamento de Botanica
BRAS	LGEMA407-08	LGEMA-592	33		672[0n]	2	0	Yes	JN801687				Glyphorynchus spirurus				Universidade de Sao Paulo, Departamento de Botanica
BRAS	LGEMA169-07	LGEMA-9566	AMZ005		733[0n]	0	0	No	JN801688				Glyphorynchus spirurus				Universidade de Sao Paulo, Departamento de Botanica
BRAS	LGEMA168-07	LGEMA-9565	AMZ004		733[0n]	2	0	Yes	JN801689				Glyphorynchus spirurus				Universidade de Sao Paulo, Departamento de Botanica
BRAS	LGEMA237-07	LGEMA-9796	AMZ235		761[1n]	2	0	Yes	JN801690				Glyphorynchus spirurus				Universidade de Sao Paulo, Departamento de Botanica
BRAS	LGEMA112-07	LGEMA-2744	115		750[0n]	2	0	Yes	JN801691				Gnorimopsar chopi				Universidade de Sao Paulo, Departamento de Botanica
BRAS	LGEMA051-07	LGEMA-484	970198		603[0n]	2	0	Yes	JN801692				Granatellus pelzelni				Universidade de Sao Paulo, Departamento de Botanica
BRAS	LGEMA408-08	LGEMA-2546	LGEMA-2546		741[0n]	2	0	No	JN801693				Gubernatrix cristata				Universidade de Sao Paulo, Departamento de Botanica
BRAS	LGEMA409-08	LGEMA-1620	LGEMA-1620		706[0n]	2	0	Yes	JN801694				Gubernetes yetapa				Universidade de Sao Paulo, Departamento de Botanica
BRAS	LGEMA181-07	LGEMA-9596	AMZ035		739[0n]	2	0	Yes	JN801695				Gymnopithys leucaspis				Universidade de Sao Paulo, Departamento de Botanica
BRAS	LGEMA273-07	LGEMA-10020	AMZ459		743[0n]	2	0	Yes	JN801696				Gymnopithys rufigula				Universidade de Sao Paulo, Departamento de Botanica
BRAS	BROMB280-06	3525	3525		622[0n]	2	0	Yes	JN801697			23-Jul-1994	Gymnopithys rufigula	A			Royal Ontario Museum
BRAS	BROMB263-06	3486	3486		887[0n]	2	0	Yes	JN801698			17-Jul-1994	Gymnopithys rufigula	A			Royal Ontario Museum
BRAS	LGEMA530-08	LGEMA-408	17		708[0n]	2	0	Yes	JN801699				Gymnostinops bifasciatus				Universidade de Sao Paulo, Departamento de Botanica
BRAS	LGEMA089-07	LGEMA-2047	050006		735[0n]	2	0	Yes	JN801700				Habia rubica				Universidade de Sao Paulo, Departamento de Botanica
BRAS	LGEMA078-07	LGEMA-1397	LGEMA-1397		735[0n]	2	0	Yes	JN801701				Habia rubica				Universidade de Sao Paulo, Departamento de Botanica
BRAS	LGEMA411-08	LGEMA-1758	970068		706[0n]	1	0	No	JN801702				Habia rubica				Universidade de Sao Paulo, Departamento de Botanica
BRAS	LGEMA311-07	LGEMA-10316	A0146		662[0n]	2	0	Yes	JN801703			06-Nov-2006	Habia rubica				Universidade de Sao Paulo, Departamento de Botanica
BRAS	BROMB282-06	3565	3565		755[0n]	2	0	Yes	JN801704			28-Jul-1994	Haematoderus militaris	A			Royal Ontario Museum
BRAS	LGEMA412-08	LGEMA-1611	21		679[0n]	2	0	Yes	JN801705				Haplospiza unicolor				Universidade de Sao Paulo, Departamento de Botanica
BRAS	LGEMA413-08	LGEMA-233	LGEMA-233		711[0n]	2	0	Yes	JN801706				Harpagus bidentatus				Universidade de Sao Paulo, Departamento de Botanica
BRAS	LGEMA022-07	LGEMA-307	121		735[0n]	2	0	Yes	JN801707				Harpagus diodon				Universidade de Sao Paulo, Departamento de Botanica
BRAS	LGEMA414-08	LGEMA-339	LGEMA-339	LGEMA-339	697[0n]	4	0	Yes	JN801708				Harpyhaliaetus coronatus				Universidade de Sao Paulo, Departamento de Botanica	Delete two traces files
BRAS	ROMC088-07	391270	391270		803[0n]	2	0	Yes	JN801709				Heliactin bilophus				Field Museum of Natural History	voucher at Museu Goeldi
BRAS	LGEMA415-08	LGEMA-2194	45 ROP		695[0n]	2	0	Yes	JN801710				Heliobletus contaminatus				Universidade de Sao Paulo, Departamento de Botanica
BRAS	ROMC110-07	433205	433205		734[0n]	1	0	No	JN801711			10-Oct-2001	Heliodoxa aurescens				Field Museum of Natural History	voucher: skin
BRAS	ROMC084-07	389718	389718		803[0n]	2	0	Yes	JN801712			05-Nov-1986	Heliothryx auritus		auriculata		Field Museum of Natural History	skin and skeleton at Museu Goeldi
BRAS	LGEMA220-07	LGEMA-9697	AMZ136		730[0n]	2	0	Yes	JN801713				Heliothryx barroti				Universidade de Sao Paulo, Departamento de Botanica
BRAS	LGEMA191-07	LGEMA-9617	AMZ056		747[0n]	2	0	Yes	JN801714				Hemithraupis flavicollis				Universidade de Sao Paulo, Departamento de Botanica
BRAS	LGEMA052-07	LGEMA-485	970332		735[0n]	2	0	Yes	JN801715				Hemithraupis flavicollis				Universidade de Sao Paulo, Departamento de Botanica
BRAS	LGEMA124-07	LGEMA-2832	264		709[0n]	2	0	Yes	JN801716				Hemithraupis guira				Universidade de Sao Paulo, Departamento de Botanica
BRAS	LGEMA417-08	LGEMA-1167	ITA196		702[0n]	2	0	Yes	JN801717				Hemitriccus diops				Universidade de Sao Paulo, Departamento de Botanica
BRAS	LGEMA309-07	LGEMA-10298	MMC171		740[0n]	2	0	Yes	JN801718				Hemitriccus margaritaceiventer				Universidade de Sao Paulo, Departamento de Botanica
BRAS	LGEMA418-08	LGEMA-2720	43		731[0n]	2	0	Yes	JN801719				Hemitriccus margaritaceiventer				Universidade de Sao Paulo, Departamento de Botanica
BRAS	LGEMA277-07	LGEMA-10149	154		717[0n]	2	0	Yes	JN801720				Hemitriccus minor				Universidade de Sao Paulo, Departamento de Botanica
BRAS	LGEMA419-08	LGEMA-559	93		687[0n]	2	0	Yes	JN801721				Hemitriccus minor				Universidade de Sao Paulo, Departamento de Botanica
BRAS	LGEMA099-07	LGEMA-2412	A0055		780[0n]	4	0	Yes	JN801722				Hemitriccus nidipendulus				Universidade de Sao Paulo, Departamento de Botanica
BRAS	LGEMA420-08	LGEMA-2078	50038		685[0n]	2	0	Yes	JN801723				Hemitriccus orbitatus				Universidade de Sao Paulo, Departamento de Botanica
BRAS	LGEMA421-08	LGEMA-10301	MMC23		718[0n]	2	0	Yes	JN801724				Herpsilochmus atricapillus				Universidade de Sao Paulo, Departamento de Botanica
BRAS	LGEMA108-07	LGEMA-2719	42		740[0n]	4	0	Yes	JN801725				Herpsilochmus sellowi		sellowi		Universidade de Sao Paulo, Departamento de Botanica
BRAS	LGEMA327-07	LGEMA-10541	389	LGEMA-10541	735[0n]	2	0	Yes	JN801726				Himantopus mexicanus				Universidade de Sao Paulo, Departamento de Botanica
BRAS	LGEMA423-08	LGEMA-594	51		680[0n]	2	0	Yes	JN801727				Hylexetastes perrotii				Universidade de Sao Paulo, Departamento de Botanica
BRAS	LGEMA424-08	LGEMA-2117	1		734[0n]	2	0	Yes	JN801728				Hylexetastes uniformis				Universidade de Sao Paulo, Departamento de Botanica
BRAS	LGEMA319-07	LGEMA-10335	A0169		729[0n]	2	0	Yes	JN801729			06-Nov-2006	Hylocharis cyanus				Universidade de Sao Paulo, Departamento de Botanica
BRAS	LGEMA426-08	LGEMA-567	100		689[0n]	2	0	Yes	JN801730				Hyloctistes subulatus				Universidade de Sao Paulo, Departamento de Botanica
BRAS	LGEMA427-08	LGEMA-2773	154		731[0n]	2	0	Yes	JN801731				Hylopezus ochroleucus				Universidade de Sao Paulo, Departamento de Botanica
BRAS	LGEMA438-08	LGEMA-10003		AMZ442	742[0n]	2	0	Yes	JN801732				Hylophilus ochraceiceps				Universidade de Sao Paulo, Departamento de Botanica
BRAS	LGEMA429-08	LGEMA-600	105		697[0n]	2	0	Yes	JN801733				Hylophilus ochraceiceps				Universidade de Sao Paulo, Departamento de Botanica
BRAS	LGEMA214-07	LGEMA-9675	AMZ114		752[0n]	2	0	Yes	JN801734				Hylophilus ochraceiceps				Universidade de Sao Paulo, Departamento de Botanica
BRAS	LGEMA428-08	LGEMA-2120	LGEMA-2120		743[0n]	2	0	Yes	JN801735				Hylophilus semicinereus				Universidade de Sao Paulo, Departamento de Botanica
BRAS	LGEMA431-08	LGEMA-9698		AMZ137	700[0n]	2	0	Yes	JN801736				Hylophilus thoracicus				Universidade de Sao Paulo, Departamento de Botanica
BRAS	LGEMA432-08	LGEMA-2118	1		746[0n]	2	0	Yes	JN801737				Hylophylax naevius				Universidade de Sao Paulo, Departamento de Botanica
BRAS	LGEMA180-07	LGEMA-9593	AMZ032		742[0n]	2	0	Yes	JN801738				Hylophylax naevius				Universidade de Sao Paulo, Departamento de Botanica
BRAS	LGEMA436-08	LGEMA-9947		AMZ386	734[0n]	2	0	Yes	JN801739				Hylophylax poecilinotus				Universidade de Sao Paulo, Departamento de Botanica
BRAS	LGEMA435-08	LGEMA-9894		AMZ333	712[0n]	2	0	Yes	JN801740				Hylophylax poecilinotus				Universidade de Sao Paulo, Departamento de Botanica
BRAS	LGEMA433-08	LGEMA-450	970054		702[0n]	2	0	Yes	JN801741				Hylophylax poecilinotus				Universidade de Sao Paulo, Departamento de Botanica
BRAS	LGEMA058-07	LGEMA-522	57		753[0n]	2	0	Yes	JN801742				Hylophylax poecilinotus				Universidade de Sao Paulo, Departamento de Botanica
BRAS	LGEMA244-07	LGEMA-9832	AMZ271		751[0n]	2	0	Yes	JN801743				Hylophylax poecilinotus				Universidade de Sao Paulo, Departamento de Botanica
BRAS	LGEMA293-07	LGEMA-10205	213		750[1n]	0	0	No	JN801744				Hylophylax poecilinotus				Universidade de Sao Paulo, Departamento de Botanica
BRAS	LGEMA437-08	LGEMA-466	970304		702[0n]	2	0	Yes	JN801745				Hylophylax punctulatus				Universidade de Sao Paulo, Departamento de Botanica
BRAS	BROMB273-06	3506	3506		687[0n]	2	0	Yes	JN801746			19-Jul-1994	Hypocnemis cantator	A			Royal Ontario Museum
BRAS	LGEMA439-08	LGEMA-446	970038		714[0n]	3	0	Yes	JN801747				Hypocnemis cantator				Universidade de Sao Paulo, Departamento de Botanica
BRAS	LGEMA190-07	LGEMA-9616	AMZ055		736[0n]	2	0	Yes	JN801748				Hypocnemis hypoxantha				Universidade de Sao Paulo, Departamento de Botanica
BRAS	LGEMA026-07	LGEMA-348	LGEMA-348		746[0n]	2	0	Yes	JN801749				Ibycter americanus				Universidade de Sao Paulo, Departamento de Botanica
BRAS	LGEMA440-08	LGEMA-2779	160		715[0n]	2	0	Yes	JN801750				Icterus cayanensis				Universidade de Sao Paulo, Departamento de Botanica
BRAS	LGEMA263-07	LGEMA-9935	AMZ374		737[0n]	2	0	Yes	JN801751				Icterus chrysocephalus				Universidade de Sao Paulo, Departamento de Botanica
BRAS	LGEMA441-08	LGEMA-2742	113		732[0n]	2	0	Yes	JN801752				Icterus jamacaii				Universidade de Sao Paulo, Departamento de Botanica
BRAS	LGEMA023-07	LGEMA-342	LGEMA-342		735[0n]	2	0	Yes	JN801753				Ictinia plumbea				Universidade de Sao Paulo, Departamento de Botanica
BRAS	LGEMA334-07	LGEMA-1147	ITA175		735[0n]	0	0	No	JN801754				Ilicura militaris				Universidade de Sao Paulo, Departamento de Botanica
BRAS	LGEMA148-07	LGEMA-3301	113		745[1n]	2	0	Yes	JN801755				Jacamerops aureus				Universidade de Sao Paulo, Departamento de Botanica
BRAS	LGEMA224-07	LGEMA-9720	AMZ159		734[0n]	2	0	Yes	JN801756				Jacamerops aureus				Universidade de Sao Paulo, Departamento de Botanica
BRAS	LGEMA279-07	LGEMA-10152	157		713[0n]	2	0	Yes	JN801757				Jacamerops aureus				Universidade de Sao Paulo, Departamento de Botanica
BRAS	ROMC092-07	393024	393024		803[0n]	2	0	Yes	JN801758			08-Jul-1995	Klais guimeti		guimeti		Field Museum of Natural History	voucher at Western Foundation of Vertebrate Zoology
BRAS	ROMC108-07	433151	433151		722[0n]	2	0	Yes	JN801759			28-Oct-2001	Lafresnaya lafresnayi		rectirostris		Field Museum of Natural History	voucher: skin
BRAS	LGEMA443-08	LGEMA-478	970030		684[0n]	2	0	Yes	JN801760				Lanio versicolor				Universidade de Sao Paulo, Departamento de Botanica
BRAS	LGEMA444-08	LGEMA-557	79		718[0n]	2	0	Yes	JN801761				Laniocera hypopyrra				Universidade de Sao Paulo, Departamento de Botanica
BRAS	LGEMA257-07	LGEMA-9906	AMZ345		752[0n]	2	0	Yes	JN801762				Laniocera hypopyrra				Universidade de Sao Paulo, Departamento de Botanica
BRAS	LGEMA076-07	LGEMA-1365	ITA286		735[0n]	2	0	Yes	JN801763				Lathrotriccus euleri				Universidade de Sao Paulo, Departamento de Botanica
BRAS	LGEMA037-07	LGEMA-404	12		735[0n]	4	0	Yes	JN801764				Lathrotriccus euleri				Universidade de Sao Paulo, Departamento de Botanica
BRAS	LGEMA185-07	LGEMA-9610	AMZ049		743[0n]	2	0	Yes	JN801765				Legatus leucophaius				Universidade de Sao Paulo, Departamento de Botanica
BRAS	LGEMA170-07	LGEMA-9568	AMZ007		750[0n]	4	0	Yes	JN801766				Lepidocolaptes albolineatus				Universidade de Sao Paulo, Departamento de Botanica
BRAS	LGEMA446-08	LGEMA-2231	331		716[0n]	2	0	Yes	JN801767				Lepidocolaptes angustirostris				Universidade de Sao Paulo, Departamento de Botanica
BRAS	LGEMA445-08	LGEMA-536	26		700[0n]	2	0	Yes	JN801768				Lepidocolaptes angustirostris				Universidade de Sao Paulo, Departamento de Botanica
BRAS	LGEMA518-08	LGEMA-2113	1		702[0n]	2	0	Yes	JN801769				Lepidothrix nattereri				Universidade de Sao Paulo, Departamento de Botanica
BRAS	LGEMA517-08	LGEMA-546	7		695[0n]	2	0	Yes	JN801770				Lepidothrix nattereri				Universidade de Sao Paulo, Departamento de Botanica
BRAS	LGEMA521-08	LGEMA-1063	LGEMA-1063		697[0n]	2	0	Yes	JN801771				Lepidothrix vilasboasi				Universidade de Sao Paulo, Departamento de Botanica
BRAS	LGEMA321-07	LGEMA-10338	A0172		700[0n]	1	0	No	JN801772			06-Nov-2006	Leptopogon amaurocephalus				Universidade de Sao Paulo, Departamento de Botanica
BRAS	LGEMA326-07	LGEMA-10540	T35		731[0n]	2	0	Yes	JN801773			15-Feb-2007	Leucopternis albicollis albicollis				Universidade de Sao Paulo, Departamento de Botanica
BRAS	LGEMA033-07	LGEMA-364	55		735[0n]	2	0	Yes	JN801774				Leucopternis kuhli				Universidade de Sao Paulo, Departamento de Botanica
BRAS	LGEMA018-07	LGEMA-258	LGEMA-258		735[0n]	2	0	Yes	JN801775				Leucopternis lacernulatus				Universidade de Sao Paulo, Departamento de Botanica
BRAS	LGEMA447-08	LGEMA-9671		AMZ110	712[0n]	2	0	Yes	JN801776				Lipaugus vociferans				Universidade de Sao Paulo, Departamento de Botanica
BRAS	LGEMA065-07	LGEMA-608	30		702[0n]	2	0	Yes	JN801777				Lipaugus vociferans				Universidade de Sao Paulo, Departamento de Botanica
BRAS	LGEMA448-08	LGEMA-2149	123 40 ROP		717[0n]	2	0	Yes	JN801778				Lochmias nematura				Universidade de Sao Paulo, Departamento de Botanica
BRAS	BROMB265-06	3489	3489		782[0n]	2	0	Yes	JN801779			17-Jul-1994	Lophotriccus galeatus	A			Royal Ontario Museum
BRAS	LGEMA184-07	LGEMA-9603	AMZ042		738[0n]	2	0	Yes	JN801780				Lurocalis semitorquatus				Universidade de Sao Paulo, Departamento de Botanica
BRAS	LGEMA335-07	LGEMA-1174	ITA203		735[0n]	2	0	Yes	JN801781				Mackenziaena severa				Universidade de Sao Paulo, Departamento de Botanica
BRAS	LGEMA261-07	LGEMA-9932	AMZ371		750[0n]	2	0	Yes	JN801782				Malacoptila fusca				Universidade de Sao Paulo, Departamento de Botanica
BRAS	LGEMA143-07	LGEMA-3290	970150		731[0n]	2	0	Yes	JN801783				Malacoptila rufa				Universidade de Sao Paulo, Departamento de Botanica
BRAS	LGEMA286-07	LGEMA-10189	197		730[0n]	2	0	Yes	JN801784				Malacoptila rufa				Universidade de Sao Paulo, Departamento de Botanica
BRAS	LGEMA449-08	LGEMA-3299	103		700[0n]	2	0	Yes	JN801785				Malacoptila rufa				Universidade de Sao Paulo, Departamento de Botanica
BRAS	LGEMA147-07	LGEMA-3300	106		698[0n]	2	0	Yes	JN801786				Malacoptila rufa				Universidade de Sao Paulo, Departamento de Botanica
BRAS	LGEMA150-07	LGEMA-3516	MZUSP ITA 213		737[0n]	2	0	Yes	JN801787				Malacoptila striata				Universidade de Sao Paulo, Departamento de Botanica
BRAS	LGEMA316-07	LGEMA-10327	A0158		740[0n]	2	0	Yes	JN801788			06-Nov-2006	Manacus manacus				Universidade de Sao Paulo, Departamento de Botanica
BRAS	LGEMA093-07	LGEMA-2077	050037		695[0n]	2	0	Yes	JN801789				Manacus manacus				Universidade de Sao Paulo, Departamento de Botanica
BRAS	LGEMA118-07	LGEMA-2767	148		752[0n]	2	0	Yes	JN801790				Megarynchus pitangua				Universidade de Sao Paulo, Departamento de Botanica
BRAS	LGEMA303-07	LGEMA-10247	258		734[0n]	2	0	Yes	JN801791				Megascops atricapilla				Universidade de Sao Paulo, Departamento de Botanica
BRAS	LGEMA159-07	LGEMA-9532	A0124		739[0n]	2	0	Yes	JN801792			11-Dec-2005	Megascops choliba				Universidade de Sao Paulo, Departamento de Botanica
BRAS	LGEMA231-07	LGEMA-9765	AMZ204		731[0n]	2	0	Yes	JN801793				Megascops choliba				Universidade de Sao Paulo, Departamento de Botanica
BRAS	LGEMA166-07	LGEMA-9562	AMZ001		743[0n]	2	0	Yes	JN801794				Megastictus margaritatus				Universidade de Sao Paulo, Departamento de Botanica
BRAS	LGEMA113-07	LGEMA-2745	117		732[0n]	2	0	Yes	JN801795				Megaxenops parnaguae				Universidade de Sao Paulo, Departamento de Botanica
BRAS	LGEMA262-07	LGEMA-9933	AMZ372		735[0n]	2	0	Yes	JN801796				Melanerpes cruentatus				Universidade de Sao Paulo, Departamento de Botanica
BRAS	LGEMA056-07	LGEMA-504	34		727[0n]	2	0	Yes	JN801797				Melanopareia torquata				Universidade de Sao Paulo, Departamento de Botanica
BRAS	LGEMA034-07	LGEMA-365	LGEMA-365		730[0n]	2	0	Yes	JN801798				Micrastur gilvicollis				Universidade de Sao Paulo, Departamento de Botanica
BRAS	LGEMA450-08	LGEMA-234	LGEMA-234		713[0n]	2	0	Yes	JN801799				Micrastur gilvicollis				Universidade de Sao Paulo, Departamento de Botanica
BRAS	LGEMA451-08	LGEMA-350	84		706[0n]	2	0	Yes	JN801800				Micrastur gilvicollis				Universidade de Sao Paulo, Departamento de Botanica
BRAS	LGEMA024-07	LGEMA-343	50		731[0n]	2	0	Yes	JN801801				Micrastur ruficollis				Universidade de Sao Paulo, Departamento de Botanica
BRAS	LGEMA453-08	LGEMA-356	7		711[0n]	3	0	Yes	JN801802				Micrastur ruficollis				Universidade de Sao Paulo, Departamento de Botanica
BRAS	LGEMA452-08	LGEMA-345	173		711[0n]	2	0	Yes	JN801803				Micrastur ruficollis				Universidade de Sao Paulo, Departamento de Botanica
BRAS	LGEMA030-07	LGEMA-358	272		733[0n]	2	0	Yes	JN801804				Micrastur semitorquatus				Universidade de Sao Paulo, Departamento de Botanica
BRAS	LGEMA179-07	LGEMA-9591	AMZ030		731[0n]	2	0	Yes	JN801805				Microbates collaris				Universidade de Sao Paulo, Departamento de Botanica
BRAS	LGEMA454-08	LGEMA-10015		AMZ454	715[0n]	2	0	Yes	JN801806				Microcerculus bambla				Universidade de Sao Paulo, Departamento de Botanica
BRAS	LGEMA294-07	LGEMA-10207	215		731[0n]	0	0	No	JN801807				Microcerculus marginatus				Universidade de Sao Paulo, Departamento de Botanica
BRAS	LGEMA053-07	LGEMA-486	970034		702[0n]	2	0	Yes	JN801808				Microcerculus marginatus				Universidade de Sao Paulo, Departamento de Botanica
BRAS	LGEMA029-07	LGEMA-352	64		753[0n]	2	0	Yes	JN801809				Milvago chimachima				Universidade de Sao Paulo, Departamento de Botanica
BRAS	BROMB197-06	MIMUS	MIMUS		729[0n]	2	0	Yes	JN801810			15-Apr-1997	Mimus gilvus				Royal Ontario Museum
BRAS	LGEMA075-07	LGEMA-1361	ITA279		727[0n]	2	0	Yes	JN801811				Mimus saturninus				Universidade de Sao Paulo, Departamento de Botanica
BRAS	LGEMA086-07	LGEMA-1647	15		751[0n]	2	0	Yes	JN801812				Mionectes macconnelli				Universidade de Sao Paulo, Departamento de Botanica
BRAS	LGEMA085-07	LGEMA-1646	13		740[0n]	2	0	Yes	JN801813				Mionectes oleagineus				Universidade de Sao Paulo, Departamento de Botanica
BRAS	LGEMA458-08	LGEMA-9965		AMZ404	730[0n]	2	0	Yes	JN801814				Mionectes oleagineus				Universidade de Sao Paulo, Departamento de Botanica
BRAS	LGEMA238-07	LGEMA-9800	AMZ239		721[0n]	2	0	Yes	JN801815				Mionectes oleagineus				Universidade de Sao Paulo, Departamento de Botanica
BRAS	LGEMA455-08	LGEMA-9885		AMZ324	716[0n]	2	0	Yes	JN801816				Mionectes oleagineus				Universidade de Sao Paulo, Departamento de Botanica
BRAS	BROMB267-06	3493	3493		788[0n]	2	0	Yes	JN801817			18-Jul-1994	Mionectes oleagineus	A			Royal Ontario Museum
BRAS	BROMB264-06	3487	3487		790[0n]	2	0	Yes	JN801818			17-Jul-1994	Mionectes oleagineus	A			Royal Ontario Museum
BRAS	LGEMA275-07	LGEMA-10062	AMZ501		744[0n]	2	0	Yes	JN801819				Mitu tomentosum				Universidade de Sao Paulo, Departamento de Botanica
BRAS	LGEMA212-07	LGEMA-9667	AMZ106		746[0n]	2	0	Yes	JN801820				Monasa morphoeus				Universidade de Sao Paulo, Departamento de Botanica
BRAS	LGEMA149-07	LGEMA-3306	90		742[0n]	2	0	Yes	JN801821				Monasa morphoeus				Universidade de Sao Paulo, Departamento de Botanica
BRAS	LGEMA460-08	LGEMA-3428	B-35587		730[0n]	2	0	No	JN801822				Monasa morphoeus				Universidade de Sao Paulo, Departamento de Botanica
BRAS	LGEMA461-08	LGEMA-9860		AMZ299	683[0n]	2	0	Yes	JN801823				Monasa morphoeus				Universidade de Sao Paulo, Departamento de Botanica
BRAS	LGEMA459-08	LGEMA-3297	3		607[0n]	3	0	Yes	JN801824				Monasa morphoeus				Universidade de Sao Paulo, Departamento de Botanica
BRAS	LGEMA204-07	LGEMA-9644	AMZ083		743[0n]	2	0	Yes	JN801825				Monasa nigrifrons				Universidade de Sao Paulo, Departamento de Botanica
BRAS	LGEMA227-07	LGEMA-9750	AMZ189		732[0n]	2	0	Yes	JN801826				Myiarchus ferox				Universidade de Sao Paulo, Departamento de Botanica
BRAS	LGEMA127-07	LGEMA-2986	A0112		731[0n]	2	0	Yes	JN801827				Myiarchus swainsoni				Universidade de Sao Paulo, Departamento de Botanica
BRAS	LGEMA116-07	LGEMA-2752	124		755[0n]	2	0	Yes	JN801828				Myiarchus tyrannulus				Universidade de Sao Paulo, Departamento de Botanica
BRAS	LGEMA122-07	LGEMA-2816	233		750[0n]	2	0	Yes	JN801829				Myiobius atricaudus				Universidade de Sao Paulo, Departamento de Botanica
BRAS	LGEMA465-08	LGEMA-2410	A0053		713[4n]	2	0	Yes	JN801830				Myiobius atricaudus				Universidade de Sao Paulo, Departamento de Botanica
BRAS	LGEMA470-08	LGEMA-2797	183		676[0n]	2	0	Yes	JN801831				Myiobius atricaudus				Universidade de Sao Paulo, Departamento de Botanica
BRAS	LGEMA314-07	LGEMA-10323	A0153		731[0n]	2	0	Yes	JN801832			06-Nov-2006	Myiobius barbatus				Universidade de Sao Paulo, Departamento de Botanica
BRAS	LGEMA322-07	LGEMA-10339	A0173		730[0n]	2	0	Yes	JN801833			06-Nov-2006	Myiobius barbatus				Universidade de Sao Paulo, Departamento de Botanica
BRAS	LGEMA287-07	LGEMA-10190	198		730[0n]	2	0	Yes	JN801834				Myiobius barbatus				Universidade de Sao Paulo, Departamento de Botanica
BRAS	LGEMA466-08	LGEMA-399	6		688[0n]	0	0	No	JN801835				Myiobius barbatus				Universidade de Sao Paulo, Departamento de Botanica
BRAS	LGEMA468-08	LGEMA-2628	GSC2		628[0n]	1	0	No	JN801836				Myiobius barbatus				Universidade de Sao Paulo, Departamento de Botanica
BRAS	LGEMA125-07	LGEMA-2841	281		723[0n]	2	0	Yes	JN801837				Myiodynastes maculatus				Universidade de Sao Paulo, Departamento de Botanica
BRAS	LGEMA045-07	LGEMA-436	970114		732[0n]	0	0	No	JN801838				Myiornis ecaudatus				Universidade de Sao Paulo, Departamento de Botanica
BRAS	LGEMA044-07	LGEMA-435	970112		730[0n]	2	0	Yes	JN801839				Myiozetetes luteiventris				Universidade de Sao Paulo, Departamento de Botanica
BRAS	LGEMA057-07	LGEMA-516	37		735[0n]	2	0	Yes	JN801840				Myrmeciza atrothorax				Universidade de Sao Paulo, Departamento de Botanica
BRAS	LGEMA472-08	LGEMA-10019		AMZ458	731[0n]	2	0	Yes	JN801841				Myrmeciza atrothorax				Universidade de Sao Paulo, Departamento de Botanica
BRAS	LGEMA473-08	LGEMA-515	36		674[0n]	1	0	No	JN801842				Myrmeciza hemimelaena				Universidade de Sao Paulo, Departamento de Botanica
BRAS	LGEMA317-07	LGEMA-10328	A0159		707[0n]	2	0	Yes	JN801843			06-Nov-2006	Myrmeciza squamosa				Universidade de Sao Paulo, Departamento de Botanica
BRAS	LGEMA474-08	LGEMA-589	98		702[0n]	2	0	Yes	JN801844				Myrmoborus myotherinus				Universidade de Sao Paulo, Departamento de Botanica
BRAS	LGEMA177-07	LGEMA-9587	AMZ026		751[0n]	2	0	Yes	JN801845				Myrmoborus myotherinus				Universidade de Sao Paulo, Departamento de Botanica
BRAS	LGEMA475-08	LGEMA-2782	163		738[0n]	2	0	Yes	JN801846				Myrmorchilus strigilatus				Universidade de Sao Paulo, Departamento de Botanica
BRAS	LGEMA047-07	LGEMA-463	970178		702[0n]	2	0	Yes	JN801847				Myrmornis torquata				Universidade de Sao Paulo, Departamento de Botanica
BRAS	LGEMA274-07	LGEMA-10024	AMZ463		742[0n]	2	0	Yes	JN801848				Myrmotherula axillaris				Universidade de Sao Paulo, Departamento de Botanica
BRAS	LGEMA281-07	LGEMA-10154	159		716[0n]	2	0	Yes	JN801849				Myrmotherula axillaris				Universidade de Sao Paulo, Departamento de Botanica
BRAS	LGEMA477-08	LGEMA-3234		MZUSP-76524	707[0n]	2	0	Yes	JN801850				Myrmotherula axillaris				Universidade de Sao Paulo, Departamento de Botanica
BRAS	LGEMA478-08	LGEMA-1146	ITA173		701[0n]	2	0	Yes	JN801851				Myrmotherula gularis				Universidade de Sao Paulo, Departamento de Botanica
BRAS	LGEMA249-07	LGEMA-9866	AMZ305		737[1n]	2	0	Yes	JN801852				Myrmotherula haematonota				Universidade de Sao Paulo, Departamento de Botanica
BRAS	LGEMA344-08	LGEMA-10169	176		739[0n]	3	0	Yes	JN801853				Myrmotherula hauxwelli				Universidade de Sao Paulo, Departamento de Botanica
BRAS	LGEMA479-08	LGEMA-451	970056		707[0n]	3	0	Yes	JN801854				Myrmotherula hauxwelli				Universidade de Sao Paulo, Departamento de Botanica
BRAS	LGEMA480-08	LGEMA-448	970048		702[0n]	2	0	Yes	JN801855				Myrmotherula leucophthalma				Universidade de Sao Paulo, Departamento de Botanica
BRAS	LGEMA481-08	LGEMA-9590		AMZ029	715[0n]	2	0	Yes	JN801856				Myrmotherula longipennis				Universidade de Sao Paulo, Departamento de Botanica
BRAS	LGEMA064-07	LGEMA-582	76		683[0n]	2	0	Yes	JN801857				Myrmotherula longipennis				Universidade de Sao Paulo, Departamento de Botanica
BRAS	LGEMA282-07	LGEMA-10167	174		740[0n]	2	0	Yes	JN801858				Myrmotherula menetriesii				Universidade de Sao Paulo, Departamento de Botanica
BRAS	LGEMA315-07	LGEMA-10324	A0154		719[0n]	2	0	Yes	JN801859			06-Nov-2006	Myrmotherula unicolor				Universidade de Sao Paulo, Departamento de Botanica
BRAS	LGEMA195-07	LGEMA-9626	AMZ065		733[0n]	2	0	Yes	JN801860				Nasica longirostris				Universidade de Sao Paulo, Departamento de Botanica
BRAS	LGEMA482-08	LGEMA-2786	170		717[0n]	2	0	Yes	JN801861				Nemosia pileata				Universidade de Sao Paulo, Departamento de Botanica
BRAS	BROMB685-07	DOT 6320	KGM 785		749[0n]	2	0	No	JN801862				Netta peposaca				American Museum of Natural History, Ornithology Department
BRAS	BROMB799-07	1B-1642	1B-1642	157861	744[0n]	2	2	No	JN801863			23-May-1991	Nothoprocta cinerascens	A	captive ssp: cinerascens		Royal Ontario Museum	voucher kind: skeleton
BRAS	BROMB209-06	JG 018	JG 018		676[0n]	2	0	Yes	JN801864			26-Jul-1995	Nothoprocta ornata				Royal Ontario Museum
BRAS	BROMB399-06	N.darwini 9	N.darwini9		692[0n]	2	0	Yes	JN801865			16-Apr-2005	Nothura darwinii	A			Royal Ontario Museum
BRAS	BROMB400-06	N.darwini 10	N.darwini10		697[1n]	2	0	Yes	JN801866			16-Apr-2005	Nothura darwinii	I			Royal Ontario Museum
BRAS	LGEMA299-07	LGEMA-10237	247		719[0n]	2	0	Yes	JN801867				Nyctibius griseus				Universidade de Sao Paulo, Departamento de Botanica
BRAS	LGEMA486-08	LGEMA-97	364		698[0n]	2	0	Yes	JN801868				Nyctibius griseus				Universidade de Sao Paulo, Departamento de Botanica
BRAS	BROMB688-07	DOT 7368	PAC 521		743[0n]	2	0	No	JN801869				Nycticorax nycticorax				American Museum of Natural History, Ornithology Department
BRAS	BROMB210-06	S20201	S20201		743[0n]	2	0	Yes	JN801870			06-Apr-1997	Nycticorax nycticorax	A	nycticorax		Royal Ontario Museum
BRAS	LGEMA488-08	LGEMA-9601		AMZ040	682[0n]	3	0	Yes	JN801871				Nyctidromus albicollis				Universidade de Sao Paulo, Departamento de Botanica
BRAS	BROMB269-06	3497	3497		836[0n]	2	0	Yes	JN801872			19-Jul-1994	Nyctidromus albicollis	A			Royal Ontario Museum
BRAS	LGEMA230-07	LGEMA-9754	AMZ193		726[0n]	2	0	Yes	JN801873				Nyctiprogne leucopyga				Universidade de Sao Paulo, Departamento de Botanica
BRAS	LGEMA489-08	LGEMA-3549	LGEMA-3549		730[0n]	2	0	No	JN801874				Nystalus chacuru				Universidade de Sao Paulo, Departamento de Botanica
BRAS	LGEMA153-07	LGEMA-3603	109		728[0n]	2	0	Yes	JN801875				Nystalus maculatus				Universidade de Sao Paulo, Departamento de Botanica
BRAS	LGEMA285-07	LGEMA-10187	195		730[0n]	2	0	Yes	JN801876				Nystalus striolatus				Universidade de Sao Paulo, Departamento de Botanica
BRAS	LGEMA254-07	LGEMA-9889	AMZ328		733[0n]	2	0	Yes	JN801877				Odontophorus gujanensis				Universidade de Sao Paulo, Departamento de Botanica
BRAS	LGEMA289-07	LGEMA-10198	206		736[1n]	0	0	No	JN801878				Onychorhynchus coronatus				Universidade de Sao Paulo, Departamento de Botanica
BRAS	LGEMA490-08	LGEMA-3244		MZUSP-76540	690[0n]	2	0	Yes	JN801879				Onychorhynchus coronatus				Universidade de Sao Paulo, Departamento de Botanica
BRAS	ROMC070-07	324113	324113		738[0n]	1	0	No	JN801880			08-Dec-1985	Oreonympha nobilis		nobilis		Field Museum of Natural History	skeleton
BRAS	LGEMA130-07	LGEMA-3000	A0137		734[0n]	2	0	Yes	JN801881				Pachyramphus polychopterus				Universidade de Sao Paulo, Departamento de Botanica
BRAS	LGEMA492-08	LGEMA-2833	265		686[0n]	2	0	Yes	JN801882				Pachyramphus viridis				Universidade de Sao Paulo, Departamento de Botanica
BRAS	LGEMA493-08	LGEMA-2183	32 ROP		684[0n]	2	0	Yes	JN801883				Paroaria coronata				Universidade de Sao Paulo, Departamento de Botanica
BRAS	LGEMA494-08	LGEMA-2586	GSC55		735[0n]	2	0	Yes	JN801884				Paroaria dominicana				Universidade de Sao Paulo, Departamento de Botanica
BRAS	LGEMA495-08	LGEMA-2614	GSC85		705[0n]	3	0	Yes	JN801885				Paroaria dominicana				Universidade de Sao Paulo, Departamento de Botanica
BRAS	LGEMA101-07	LGEMA-2600	GSC70	MZUSP	703[0n]	4	0	Yes	JN801886				Paroaria dominicana				Universidade de Sao Paulo, Departamento de Botanica
BRAS	BROMB390-06	P.albipennis41	P.albipennis41		812[0n]	2	0	Yes	JN801887				Penelope albipennis				Royal Ontario Museum
BRAS	BROMB389-06	P.albipennis26	P.albipennis26		812[1n]	2	0	Yes	JN801888				Penelope albipennis				Royal Ontario Museum
BRAS	BROMB388-06	P.albipennis24	P.albipennis24		812[0n]	2	0	Yes	JN801889				Penelope albipennis				Royal Ontario Museum
BRAS	BROMB386-06	P.albipennis14	P.albipennis14		825[0n]	2	0	Yes	JN801890				Penelope albipennis				Royal Ontario Museum
BRAS	BROMB385-06	P.albipennis12	P.albipennis12		824[0n]	3	0	Yes	JN801891				Penelope albipennis				Royal Ontario Museum
BRAS	BROMB401-06	P.albipenis 67	P.albipenis67		818[0n]	2	0	Yes	JN801892				Penelope albipennis				Royal Ontario Museum
BRAS	BROMB377-06	P.barbataB5	P.barbataB5		827[0n]	2	0	Yes	JN801893				Penelope barbata				Royal Ontario Museum
BRAS	LGEMA256-07	LGEMA-9904	AMZ343		735[0n]	2	0	Yes	JN801894				Penelope jacquacu				Universidade de Sao Paulo, Departamento de Botanica
BRAS	BROMB380-06	P.jaquacuB8	P.jaquacuB8		788[0n]	2	0	Yes	JN801895				Penelope jacquacu				Royal Ontario Museum
BRAS	BROMB379-06	P.jaquacuB7	P.jaquacuB7		782[0n]	2	0	Yes	JN801896				Penelope jacquacu				Royal Ontario Museum
BRAS	BROMB164-06	1B-127	SCL I	155925	800[0n]	2	2	Yes	JN801897			19-Oct-1988	Phacellodomus rufifrons	I	ssp:sincipitalis		Royal Ontario Museum	voucher type: skin
BRAS	BROMB168-06	MKP 2690	MKP 2690		809[0n]	5	0	Yes	JN801898			21-Apr-1996	Phaenicophilus palmarum				Royal Ontario Museum
BRAS	LGEMA496-08	LGEMA-2575	147		730[0n]	2	0	Yes	JN801899				Phaeomyias murina				Universidade de Sao Paulo, Departamento de Botanica
BRAS	LGEMA497-08	LGEMA-40	ITA215		686[0n]	2	0	Yes	JN801900				Phaethornis eurynome				Universidade de Sao Paulo, Departamento de Botanica
BRAS	LGEMA502-08	LGEMA-84		MZUSP-76537	699[0n]	2	0	Yes	JN801901				Phaethornis malaris				Universidade de Sao Paulo, Departamento de Botanica
BRAS	LGEMA503-08	LGEMA-82		MZUSP-76528	700[0n]	2	0	Yes	JN801902				Phaethornis nattereri				Universidade de Sao Paulo, Departamento de Botanica
BRAS	LGEMA292-07	LGEMA-10204	212		730[0n]	0	0	No	JN801903				Phaethornis ruber				Universidade de Sao Paulo, Departamento de Botanica
BRAS	LGEMA253-07	LGEMA-9884	AMZ323		751[0n]	2	0	Yes	JN801904				Phaethornis ruber				Universidade de Sao Paulo, Departamento de Botanica
BRAS	LGEMA498-08	LGEMA-9797		AMZ236	657[0n]	2	0	Yes	JN801905				Phaethornis ruber				Universidade de Sao Paulo, Departamento de Botanica
BRAS	LGEMA001-07	LGEMA-19	16		724[0n]	2	0	Yes	JN801906			16-Dec-1997	Phaethornis superciliosus				Universidade de Sao Paulo, Departamento de Botanica
BRAS	LGEMA272-07	LGEMA-10002	AMZ441		716[0n]	2	0	Yes	JN801907				Phaethornis superciliosus				Universidade de Sao Paulo, Departamento de Botanica
BRAS	LGEMA501-08	LGEMA-29		MZUSP-970308	686[0n]	3	0	Yes	JN801908				Phaethornis superciliosus				Universidade de Sao Paulo, Departamento de Botanica
BRAS	LGEMA500-08	LGEMA-22	110		686[0n]	2	0	Yes	JN801909				Phaethornis superciliosus				Universidade de Sao Paulo, Departamento de Botanica
BRAS	BROMB667-07	1B-2891	1B-2891	160041	746[0n]	2	2	Yes	JN801910			01-Mar-1998	Phalacrocorax atriceps	I	ssp:albiventer		Royal Ontario Museum	voucher kind: skin; skeleton
BRAS	LGEMA508-08	LGEMA-2418	A0064		729[0n]	2	0	Yes	JN801911				Philydor atricapillus				Universidade de Sao Paulo, Departamento de Botanica
BRAS	LGEMA504-08	LGEMA-568	115		698[0n]	2	0	Yes	JN801912				Philydor erythrocercum				Universidade de Sao Paulo, Departamento de Botanica
BRAS	LGEMA505-08	LGEMA-497	970266		701[0n]	2	0	Yes	JN801913				Philydor ruficaudatum				Universidade de Sao Paulo, Departamento de Botanica
BRAS	LGEMA182-07	LGEMA-9598	AMZ037		746[0n]	3	0	Yes	JN801914				Phlegopsis erythroptera				Universidade de Sao Paulo, Departamento de Botanica
BRAS	LGEMA507-08	LGEMA-2116	1		716[0n]	2	0	Yes	JN801915				Phlegopsis nigromaculata				Universidade de Sao Paulo, Departamento de Botanica
BRAS	LGEMA506-08	LGEMA-518	41		691[0n]	2	0	Yes	JN801916				Phlegopsis nigromaculata				Universidade de Sao Paulo, Departamento de Botanica
BRAS	LGEMA186-07	LGEMA-9612	AMZ051		725[0n]	2	0	Yes	JN801917				Phoenicircus nigricollis				Universidade de Sao Paulo, Departamento de Botanica
BRAS	LGEMA510-08	LGEMA-2446	A0009		709[0n]	0	0	No	JN801918				Phyllomyias fasciatus				Universidade de Sao Paulo, Departamento de Botanica
BRAS	LGEMA167-07	LGEMA-9564	AMZ003		750[0n]	2	0	Yes	JN801919				Phyllomyias griseiceps				Universidade de Sao Paulo, Departamento de Botanica
BRAS	LGEMA511-08	LGEMA-2176	24 ROP		733[0n]	2	0	Yes	JN801920				Phylloscartes ventralis				Universidade de Sao Paulo, Departamento de Botanica
BRAS	LGEMA512-08	LGEMA-212	970058		711[0n]	2	0	Yes	JN801921				Piaya cayana				Universidade de Sao Paulo, Departamento de Botanica
BRAS	LGEMA513-08	LGEMA-219	19		705[0n]	3	0	Yes	JN801922				Piaya cayana				Universidade de Sao Paulo, Departamento de Botanica
BRAS	LGEMA514-08	LGEMA-211	970002		711[0n]	2	0	Yes	JN801923				Piaya melanogaster				Universidade de Sao Paulo, Departamento de Botanica
BRAS	LGEMA211-07	LGEMA-9666	AMZ105		750[0n]	2	0	Yes	JN801924				Piaya melanogaster				Universidade de Sao Paulo, Departamento de Botanica
BRAS	LGEMA157-07	LGEMA-3614	270		753[0n]	2	0	Yes	JN801925				Piculus chrysochloros				Universidade de Sao Paulo, Departamento de Botanica
BRAS	LGEMA515-08	LGEMA-9856		AMZ295	705[0n]	2	0	Yes	JN801926				Piculus flavigula				Universidade de Sao Paulo, Departamento de Botanica
BRAS	LGEMA200-07	LGEMA-9638	AMZ077		774[0n]	2	0	Yes	JN801927				Picumnus lafresnayi				Universidade de Sao Paulo, Departamento de Botanica
BRAS	LGEMA152-07	LGEMA-3601	36		708[0n]	2	0	Yes	JN801928				Picumnus pygmaeus				Universidade de Sao Paulo, Departamento de Botanica
BRAS	LGEMA516-08	LGEMA-3531	ITA284		719[0n]	2	0	Yes	JN801929				Picumnus temminckii				Universidade de Sao Paulo, Departamento de Botanica
BRAS	LGEMA339-07	LGEMA-9604	AMZ043		738[0n]	4	0	Yes	JN801930				Pipra cornuta				Universidade de Sao Paulo, Departamento de Botanica
BRAS	LGEMA250-07	LGEMA-9874	AMZ313		743[0n]	2	0	Yes	JN801931				Pipra erythrocephala				Universidade de Sao Paulo, Departamento de Botanica
BRAS	LGEMA060-07	LGEMA-533	LGEMA-533		734[0n]	2	0	Yes	JN801932				Pipra fasciicauda				Universidade de Sao Paulo, Departamento de Botanica
BRAS	LGEMA520-08	LGEMA-473	970076		702[0n]	2	0	Yes	JN801933				Pipra rubrocapilla				Universidade de Sao Paulo, Departamento de Botanica
BRAS	LGEMA216-07	LGEMA-9683	AMZ122		742[0n]	2	0	Yes	JN801934				Piprites chloris				Universidade de Sao Paulo, Departamento de Botanica
BRAS	LGEMA049-07	LGEMA-475	970196		727[0n]	2	0	Yes	JN801935				Piprites chloris				Universidade de Sao Paulo, Departamento de Botanica
BRAS	LGEMA522-08	LGEMA-476	970236		702[0n]	2	0	Yes	JN801936				Piprites chloris				Universidade de Sao Paulo, Departamento de Botanica
BRAS	LGEMA523-08	LGEMA-2795	180		729[0n]	2	0	Yes	JN801937				Piranga flava				Universidade de Sao Paulo, Departamento de Botanica
BRAS	LGEMA097-07	LGEMA-2212	302	MZUSP	739[0n]	1	0	No	JN801938				Pitangus sulphuratus				Universidade de Sao Paulo, Departamento de Botanica
BRAS	LGEMA300-07	LGEMA-10240	250		726[0n]	2	0	Yes	JN801939				Pitangus sulphuratus				Universidade de Sao Paulo, Departamento de Botanica
BRAS	LGEMA172-07	LGEMA-9573	AMZ012		717[0n]	2	0	Yes	JN801940				Pithys albifrons				Universidade de Sao Paulo, Departamento de Botanica
BRAS	LGEMA183-07	LGEMA-9599	AMZ038		760[0n]	2	0	Yes	JN801941				Pithys albifrons				Universidade de Sao Paulo, Departamento de Botanica
BRAS	BROMB272-06	3503	3503		697[0n]	2	0	Yes	JN801942			19-Jul-1994	Pithys albifrons	A			Royal Ontario Museum
BRAS	BROMB271-06	3502	3502		685[0n]	2	0	Yes	JN801943			19-Jul-1994	Pithys albifrons	A			Royal Ontario Museum
BRAS	LGEMA088-07	LGEMA-1755	6 ROP		701[0n]	2	0	Yes	JN801944				Platyrinchus mystaceus				Universidade de Sao Paulo, Departamento de Botanica
BRAS	LGEMA526-08	LGEMA-558	88		680[0n]	2	0	Yes	JN801945				Platyrinchus saturatus				Universidade de Sao Paulo, Departamento de Botanica
BRAS	LGEMA571-08	LGEMA-1161	ITA189		701[0n]	2	0	Yes	JN801946				Poecilotriccus plumbeiceps				Universidade de Sao Paulo, Departamento de Botanica
BRAS	LGEMA416-08	LGEMA-2124	1		688[0n]	2	0	Yes	JN801947				Poecilotriccus senex				Universidade de Sao Paulo, Departamento de Botanica
BRAS	LGEMA527-08	LGEMA-2115	1		711[0n]	2	0	Yes	JN801948				Polioptila guianensis				Universidade de Sao Paulo, Departamento de Botanica
BRAS	LGEMA528-08	LGEMA-2721	44		706[0n]	2	0	Yes	JN801949				Polioptila plumbea				Universidade de Sao Paulo, Departamento de Botanica
BRAS	LGEMA010-07	LGEMA-68	255		735[0n]	2	0	Yes	JN801950			25-Jan-2005	Polyerata fimbriata				Universidade de Sao Paulo, Departamento de Botanica
BRAS	LGEMA529-08	LGEMA-2175	23 ROP		701[0n]	2	0	Yes	JN801951				Poospiza lateralis				Universidade de Sao Paulo, Departamento de Botanica
BRAS	BROMB261-06	G39079	G39079		810[0n]	2	0	Yes	JN801952			04-May-1999	Porzana spiloptera				Royal Ontario Museum
BRAS	BROMB260-06	G39077	G39077		788[0n]	2	0	Yes	JN801953			04-May-1999	Porzana spiloptera				Royal Ontario Museum
BRAS	LGEMA222-07	LGEMA-9707	AMZ146		725[0n]	2	0	Yes	JN801954				Progne tapera				Universidade de Sao Paulo, Departamento de Botanica
BRAS	LGEMA210-07	LGEMA-9665	AMZ104		705[0n]	2	0	Yes	JN801955				Psarocolius viridis				Universidade de Sao Paulo, Departamento de Botanica
BRAS	LGEMA531-08	LGEMA-2991	A0122		582[0n]	2	0	Yes	JN801956				Psilorhamphus guttatus				Universidade de Sao Paulo, Departamento de Botanica
BRAS	LGEMA247-07	LGEMA-9862	AMZ301		730[0n]	2	0	Yes	JN801957				Psophia leucoptera		ochroptera		Universidade de Sao Paulo, Departamento de Botanica
BRAS	LGEMA343-08	LGEMA-10186	194		716[0n]	2	0	Yes	JN801958				Pteroglossus bitorquatus				Universidade de Sao Paulo, Departamento de Botanica
BRAS	LGEMA144-07	LGEMA-3291	970246		697[0n]	0	0	No	JN801959				Pteroglossus bitorquatus				Universidade de Sao Paulo, Departamento de Botanica
BRAS	LGEMA532-08	LGEMA-3252		MZUSP-76549	731[0n]	2	0	Yes	JN801960				Pyriglena leuconota				Universidade de Sao Paulo, Departamento de Botanica
BRAS	LGEMA141-07	LGEMA-3270	104		750[0n]	2	0	Yes	JN801961				Pyriglena leuconota				Universidade de Sao Paulo, Departamento de Botanica
BRAS	LGEMA092-07	LGEMA-2071	050030		735[0n]	2	0	Yes	JN801962				Pyriglena leucoptera				Universidade de Sao Paulo, Departamento de Botanica
BRAS	LGEMA073-07	LGEMA-1354	ITA270		743[0n]	2	0	Yes	JN801963				Pyrrhocoma ruficeps				Universidade de Sao Paulo, Departamento de Botanica
BRAS	LGEMA297-07	LGEMA-10225	233		768[0n]	2	0	Yes	JN801964				Querula purpurata				Universidade de Sao Paulo, Departamento de Botanica
BRAS	BROMB275-06	3513	3513		703[0n]	1	0	No	JN801965			21-Jul-1994	Querula purpurata	A			Royal Ontario Museum
BRAS	BROMB714-07	1B-1004	1B-1004	157310	779[0n]	2	3	No	JN801966			27-Jan-1992	Ramphastos toco	A	captive		Royal Ontario Museum	voucher kind: skeleton
BRAS	LGEMA145-07	LGEMA-3292	970248		730[0n]	2	0	Yes	JN801967				Ramphastos vitellinus				Universidade de Sao Paulo, Departamento de Botanica
BRAS	LGEMA533-08	LGEMA-10320	A0150		719[0n]	2	0	Yes	JN801968				Ramphodon naevius				Universidade de Sao Paulo, Departamento de Botanica
BRAS	BROMB207-06	MKP 2757	MKP 2757		866[0n]	2	0	Yes	JN801969			20-Sep-1996	Rhea americana				Royal Ontario Museum
BRAS	BROMB206-06	MKP 2756	MKP 2756		910[0n]	2	0	Yes	JN801970			20-Sep-1996	Rhea americana				Royal Ontario Museum
BRAS	BROMB205-06	MKP 2749	MKP 2749		687[0n]	2	0	Yes	JN801971			04-Nov-1996	Rhea pennata				Royal Ontario Museum
BRAS	BROMB204-06	MKP 2747	MKP 2747		825[0n]	2	0	Yes	JN801972			04-Nov-1996	Rhea pennata				Royal Ontario Museum
BRAS	BROMB203-06	MKP 2745	MKP 2745		825[0n]	2	0	Yes	JN801973			04-Nov-1996	Rhea pennata				Royal Ontario Museum
BRAS	LGEMA534-08	LGEMA-2110	3		702[0n]	2	0	Yes	JN801974				Rhegmatorhina sp.				Universidade de Sao Paulo, Departamento de Botanica
BRAS	LGEMA046-07	LGEMA-437	970160		732[0n]	2	0	Yes	JN801975				Rhytipterna simplex				Universidade de Sao Paulo, Departamento de Botanica
BRAS	LGEMA535-08	LGEMA-562	111		703[0n]	2	0	Yes	JN801976				Rhytipterna simplex		Rhytipterna hispidus		Universidade de Sao Paulo, Departamento de Botanica
BRAS	LGEMA298-07	LGEMA-10234	244		757[0n]	2	0	Yes	JN801977				Saltator grossus				Universidade de Sao Paulo, Departamento de Botanica
BRAS	LGEMA260-07	LGEMA-9925	AMZ364		761[0n]	2	0	Yes	JN801978				Saltator maximus				Universidade de Sao Paulo, Departamento de Botanica
BRAS	LGEMA140-07	LGEMA-3265		MZUSP-76560	744[0n]	2	0	Yes	JN801979				Saltator maximus				Universidade de Sao Paulo, Departamento de Botanica	Skin
BRAS	LGEMA538-08	LGEMA-354	321		710[0n]	2	0	Yes	JN801980				Sarcoramphus papa				Universidade de Sao Paulo, Departamento de Botanica
BRAS	LGEMA205-07	LGEMA-9645	AMZ084		761[0n]	0	0	No	JN801981				Schiffornis turdina				Universidade de Sao Paulo, Departamento de Botanica
BRAS	LGEMA061-07	LGEMA-547	16		719[0n]	2	0	Yes	JN801982				Schiffornis turdina				Universidade de Sao Paulo, Departamento de Botanica
BRAS	LGEMA539-08	LGEMA-2084	50044		682[0n]	2	0	Yes	JN801983				Schiffornis virescens				Universidade de Sao Paulo, Departamento de Botanica
BRAS	LGEMA540-08	LGEMA-494	970186		702[0n]	2	0	Yes	JN801984				Sclerurus rufigularis				Universidade de Sao Paulo, Departamento de Botanica
BRAS	ROMC329-07	1B-2970	1B-2970	160171	779[0n]	1	3	No	JN801985			30-Oct-1997	Selenidera maculirostris	A			Royal Ontario Museum	voucher: skeleton
BRAS	LGEMA541-08	LGEMA-2064	50023		706[0n]	2	0	Yes	JN801986				Sittasomus griseicapillus				Universidade de Sao Paulo, Departamento de Botanica
BRAS	LGEMA542-08	LGEMA-2706	23		621[0n]	2	0	Yes	JN801987				Sittasomus griseicapillus				Universidade de Sao Paulo, Departamento de Botanica
BRAS	LGEMA543-08	LGEMA-500	970230		698[0n]	2	0	Yes	JN801988				Skutchia borbae				Universidade de Sao Paulo, Departamento de Botanica
BRAS	LGEMA544-08	LGEMA-442	970014		690[0n]	2	0	Yes	JN801989				Skutchia borbae				Universidade de Sao Paulo, Departamento de Botanica
BRAS	LGEMA129-07	LGEMA-2997	A0132		733[0n]	2	0	Yes	JN801990				Sporophila bouvreuil				Universidade de Sao Paulo, Departamento de Botanica
BRAS	LGEMA310-07	LGEMA-10302	MMC29		719[0n]	2	0	Yes	JN801991			28-Feb-2005	Sporophila caerulescens		originally identified as S. nigricollis		Universidade de Sao Paulo, Departamento de Botanica	::taxonomy:originally identified as S. nigricollis::endTaxonomy:
BRAS	LGEMA546-08	LGEMA-3001	A0138		715[0n]	2	0	Yes	JN801992				Sporophila collaris				Universidade de Sao Paulo, Departamento de Botanica
BRAS	LGEMA102-07	LGEMA-2687	403		731[0n]	2	0	Yes	JN801993				Sporophila lineola				Universidade de Sao Paulo, Departamento de Botanica
BRAS	LGEMA545-08	LGEMA-2408	A0051		736[0n]	2	0	Yes	JN801994				Sporophila nigricollis		originally identified as S. caerulescens		Universidade de Sao Paulo, Departamento de Botanica	::taxonomy:originally identified as S. caerulescens::endTaxonomy:
BRAS	LGEMA103-07	LGEMA-2688	528		729[0n]	2	0	Yes	JN801995				Sporophila nigricollis				Universidade de Sao Paulo, Departamento de Botanica
BRAS	LGEMA548-08	LGEMA-65	140		699[0n]	2	0	Yes	JN801996				Stephanoxis lalandi				Universidade de Sao Paulo, Departamento de Botanica
BRAS	LGEMA291-07	LGEMA-10202	210		729[0n]	0	0	No	JN801997				Synallaxis gujanensis				Universidade de Sao Paulo, Departamento de Botanica
BRAS	LGEMA090-07	LGEMA-2054	050013		733[0n]	2	0	Yes	JN801998				Synallaxis ruficapilla				Universidade de Sao Paulo, Departamento de Botanica
BRAS	LGEMA063-07	LGEMA-564	12		737[0n]	2	0	Yes	JN801999				Synallaxis rutilans				Universidade de Sao Paulo, Departamento de Botanica
BRAS	LGEMA270-07	LGEMA-9994	AMZ433		736[0n]	0	0	No	JN802000				Synallaxis rutilans				Universidade de Sao Paulo, Departamento de Botanica
BRAS	LGEMA549-08	LGEMA-495	970192		701[0n]	2	0	Yes	JN802001				Synallaxis rutilans				Universidade de Sao Paulo, Departamento de Botanica
BRAS	LGEMA131-07	LGEMA-3230		MZUSP-76518	754[0n]	2	0	Yes	JN802002				Synallaxis rutilans				Universidade de Sao Paulo, Departamento de Botanica	Carcass
BRAS	LGEMA115-07	LGEMA-2751	123		756[0n]	2	0	Yes	JN802003				Synallaxis scutata				Universidade de Sao Paulo, Departamento de Botanica
BRAS	LGEMA133-07	LGEMA-10581	LGEMA 10581	MZUSP-76542	737[0n]	2	0	Yes	JN802004				Syndactyla rufosuperciliata				Universidade de Sao Paulo, Departamento de Botanica
BRAS	LGEMA245-07	LGEMA-9837	AMZ276		734[0n]	2	0	Yes	JN802005				Tachycineta albiventer				Universidade de Sao Paulo, Departamento de Botanica
BRAS	BROMB242-06	1B-4439	1B-4439	101593	692[0n]	2	0	Yes	JN802006			01-Dec-1984	Tachyeres patachonicus	A			Royal Ontario Museum	voucher kind: Skeleton; wing
BRAS	BROMB186-06	AJB 4471	AJB 4471		881[0n]	2	0	Yes	JN802007			01-Dec-1984	Tachyeres pteneres				Royal Ontario Museum
BRAS	BROMB185-06	AJB 4470	AJB 4470		838[0n]	2	0	Yes	JN802008			01-Dec-1984	Tachyeres pteneres	A			Royal Ontario Museum
BRAS	LGEMA079-07	LGEMA-1400	10		721[0n]	2	0	Yes	JN802009				Tachyphonus coronatus				Universidade de Sao Paulo, Departamento de Botanica	Strange plumage, juvenile?
BRAS	LGEMA198-07	LGEMA-9633	AMZ072		738[0n]	2	0	Yes	JN802010				Tachyphonus cristatus				Universidade de Sao Paulo, Departamento de Botanica
BRAS	LGEMA243-07	LGEMA-9817	AMZ256		676[0n]	2	0	Yes	JN802011				Tachyphonus surinamus				Universidade de Sao Paulo, Departamento de Botanica
BRAS	LGEMA139-07	LGEMA-3258		MZUSP-76522	758[0n]	1	0	No	JN802012				Taeniotriccus andrei				Universidade de Sao Paulo, Departamento de Botanica	Skin
BRAS	LGEMA551-08	LGEMA-2406	A0049		685[0n]	2	0	Yes	JN802013				Tangara seledon				Universidade de Sao Paulo, Departamento de Botanica
BRAS	LGEMA552-08	LGEMA-2835	268		711[0n]	2	0	Yes	JN802014				Taraba major				Universidade de Sao Paulo, Departamento de Botanica
BRAS	LGEMA553-08	LGEMA-434	970098		712[0n]	3	0	Yes	JN802015				Terenotriccus erythrurus				Universidade de Sao Paulo, Departamento de Botanica
BRAS	LGEMA264-07	LGEMA-9967	AMZ406		750[0n]	2	0	Yes	JN802016				Terenotriccus erythrurus				Universidade de Sao Paulo, Departamento de Botanica
BRAS	LGEMA295-07	LGEMA-10216	224		740[0n]	0	0	No	JN802017				Thalurania furcata				Universidade de Sao Paulo, Departamento de Botanica
BRAS	LGEMA003-07	LGEMA-33	65		738[0n]	3	0	Yes	JN802018			01-Jul-1997	Thalurania furcata				Universidade de Sao Paulo, Departamento de Botanica
BRAS	LGEMA554-08	LGEMA-32	63		711[0n]	3	0	Yes	JN802019				Thalurania furcata				Universidade de Sao Paulo, Departamento de Botanica
BRAS	LGEMA556-08	LGEMA-10213	221		664[0n]	2	0	Yes	JN802020				Thalurania furcata				Universidade de Sao Paulo, Departamento de Botanica
BRAS	LGEMA557-08	LGEMA-10214	222		616[0n]	0	0	No	JN802021				Thalurania furcata				Universidade de Sao Paulo, Departamento de Botanica
BRAS	LGEMA004-07	LGEMA-38	ITA161		762[0n]	2	0	Yes	JN802022			22-May-2002	Thalurania glaucopis				Universidade de Sao Paulo, Departamento de Botanica
BRAS	LGEMA560-08	LGEMA-9959		AMZ398	740[0n]	2	0	Yes	JN802023				Thamnomanes caesius				Universidade de Sao Paulo, Departamento de Botanica
BRAS	LGEMA174-07	LGEMA-9576	AMZ015		716[0n]	2	0	Yes	JN802024				Thamnomanes caesius				Universidade de Sao Paulo, Departamento de Botanica
BRAS	LGEMA558-08	LGEMA-583	77		672[0n]	2	0	Yes	JN802025				Thamnomanes caesius				Universidade de Sao Paulo, Departamento de Botanica
BRAS	LGEMA559-08	LGEMA-9869		AMZ308	635[0n]	2	0	Yes	JN802026				Thamnomanes caesius				Universidade de Sao Paulo, Departamento de Botanica
BRAS	BROMB279-06	3524	3524		712[0n]	2	0	Yes	JN802027			23-Jul-1994	Thamnomanes caesius	A			Royal Ontario Museum
BRAS	LGEMA055-07	LGEMA-503	970044		735[0n]	2	0	Yes	JN802028				Thamnomanes saturninus				Universidade de Sao Paulo, Departamento de Botanica
BRAS	LGEMA342-08	LGEMA-9895	AMZ324		746[0n]	2	0	Yes	JN802029				Thamnophilus aethiops				Universidade de Sao Paulo, Departamento de Botanica
BRAS	LGEMA338-07	LGEMA-3249		MZUSP-76546	737[0n]	2	0	Yes	JN802030				Thamnophilus aethiops				Universidade de Sao Paulo, Departamento de Botanica
BRAS	LGEMA564-08	LGEMA-9998		AMZ437	728[0n]	2	0	Yes	JN802031				Thamnophilus aethiops				Universidade de Sao Paulo, Departamento de Botanica
BRAS	LGEMA563-08	LGEMA-9670		AMZ109	726[0n]	2	0	Yes	JN802032				Thamnophilus aethiops				Universidade de Sao Paulo, Departamento de Botanica
BRAS	LGEMA278-07	LGEMA-10151	156		710[0n]	2	0	Yes	JN802033				Thamnophilus aethiops				Universidade de Sao Paulo, Departamento de Botanica
BRAS	LGEMA562-08	LGEMA-588	97		702[0n]	2	0	Yes	JN802034				Thamnophilus aethiops				Universidade de Sao Paulo, Departamento de Botanica
BRAS	LGEMA561-08	LGEMA-459	970118		702[0n]	2	0	Yes	JN802035				Thamnophilus aethiops				Universidade de Sao Paulo, Departamento de Botanica
BRAS	LGEMA565-08	LGEMA-10150	155		698[1n]	2	0	Yes	JN802036				Thamnophilus aethiops				Universidade de Sao Paulo, Departamento de Botanica
BRAS	LGEMA217-07	LGEMA-9690	AMZ129		740[0n]	2	0	Yes	JN802037				Thamnophilus amazonicus				Universidade de Sao Paulo, Departamento de Botanica
BRAS	LGEMA110-07	LGEMA-2740	108		711[0n]	2	0	Yes	JN802038				Thamnophilus doliatus				Universidade de Sao Paulo, Departamento de Botanica
BRAS	LGEMA566-08	LGEMA-9883		AMZ322	719[0n]	2	0	Yes	JN802039				Thamnophilus murinus				Universidade de Sao Paulo, Departamento de Botanica
BRAS	LGEMA330-07	LGEMA-2700	13		735[0n]	2	0	Yes	JN802040				Thamnophilus pelzelni				Universidade de Sao Paulo, Departamento de Botanica
BRAS	LGEMA567-08	LGEMA-2405	A0048		655[0n]	2	0	Yes	JN802041				Thraupis ornata				Universidade de Sao Paulo, Departamento de Botanica
BRAS	LGEMA568-08	LGEMA-2852	294		700[0n]	2	0	Yes	JN802042				Thraupis palmarum				Universidade de Sao Paulo, Departamento de Botanica
BRAS	LGEMA569-08	LGEMA-2829	258		739[0n]	2	0	Yes	JN802043				Thraupis sayaca				Universidade de Sao Paulo, Departamento de Botanica
BRAS	LGEMA269-07	LGEMA-9982	AMZ421		733[0n]	0	0	No	JN802044				Thryothorus coraya				Universidade de Sao Paulo, Departamento de Botanica
BRAS	LGEMA318-07	LGEMA-10334	A0168		734[0n]	2	0	Yes	JN802045			06-Nov-2006	Thryothorus longirostris				Universidade de Sao Paulo, Departamento de Botanica
BRAS	LGEMA106-07	LGEMA-2709	26		640[0n]	2	0	Yes	JN802046				Thryothorus longirostris				Universidade de Sao Paulo, Departamento de Botanica
BRAS	LGEMA074-07	LGEMA-1358	ITA274		744[0n]	3	0	Yes	JN802047				Tiaris fuliginosus				Universidade de Sao Paulo, Departamento de Botanica
BRAS	ROMC106-07	433037	433037		803[0n]	2	0	Yes	JN802048			17-Oct-2001	Tigrisoma fasciatum		salmoni		Field Museum of Natural History	voucher: skin
BRAS	LGEMA276-07	LGEMA-10063	AMZ502		713[0n]	2	0	Yes	JN802049				Tinamus major serralus		serralus		Universidade de Sao Paulo, Departamento de Botanica
BRAS	LGEMA208-07	LGEMA-9657	AMZ096		743[0n]	2	0	Yes	JN802050				Tolmomyias assimilis				Universidade de Sao Paulo, Departamento de Botanica
BRAS	LGEMA043-07	LGEMA-432	970006		735[0n]	2	0	Yes	JN802051				Tolmomyias assimilis				Universidade de Sao Paulo, Departamento de Botanica
BRAS	LGEMA194-07	LGEMA-9623	AMZ062		728[0n]	2	0	Yes	JN802052				Tolmomyias assimilis				Universidade de Sao Paulo, Departamento de Botanica
BRAS	LGEMA105-07	LGEMA-2704	21		563[0n]	1	0	No	JN802053				Tolmomyias flaviventris				Universidade de Sao Paulo, Departamento de Botanica
BRAS	LGEMA137-07	LGEMA-3256		MZUSP-76553	736[0n]	1	0	No	JN802054				Tolmomyias sulphurescens				Universidade de Sao Paulo, Departamento de Botanica	Skin
BRAS	ROMC085-07	389726	389726		803[0n]	2	0	Yes	JN802055			17-Nov-1986	Topaza pella		microrhynchus		Field Museum of Natural History	skin and skeleton at Museu Goeldi
BRAS	LGEMA324-07	LGEMA-10367	GSC102		731[0n]	2	0	Yes	JN802056				Trichothraupis melanops				Universidade de Sao Paulo, Departamento de Botanica
BRAS	ROMC071-07	331060	331060		803[0n]	2	0	Yes	JN802057			09-May-1987	Trochilus polytmus		scitulus		Field Museum of Natural History
BRAS	BROMB156-06	AJB 4398	AJB 4398	149782	846[0n]	2	2	Yes	JN802058			25-Nov-1984	Troglodytes aedon	A	ssp:chilensis		Royal Ontario Museum	voucher type: skin, skeleton
BRAS	LGEMA163-07	LGEMA-9554	31		741[0n]	2	0	Yes	JN802059			01-Jul-1997	Trogon curucui				Universidade de Sao Paulo, Departamento de Botanica
BRAS	LGEMA165-07	LGEMA-9561	175		719[0n]	2	0	Yes	JN802060			25-Jan-2005	Trogon curucui				Universidade de Sao Paulo, Departamento de Botanica
BRAS	LGEMA573-08	LGEMA-9553	30		680[0n]	2	0	Yes	JN802061				Trogon curucui				Universidade de Sao Paulo, Departamento de Botanica
BRAS	LGEMA267-07	LGEMA-9976	AMZ415		736[0n]	2	0	Yes	JN802062				Trogon melanurus				Universidade de Sao Paulo, Departamento de Botanica
BRAS	LGEMA162-07	LGEMA-9551	LGEMA-9551		752[0n]	3	0	Yes	JN802063			16-Dec-1997	Trogon melanurus				Universidade de Sao Paulo, Departamento de Botanica
BRAS	LGEMA575-08	LGEMA-9555	5		620[0n]	2	0	Yes	JN802064				Trogon melanurus				Universidade de Sao Paulo, Departamento de Botanica
BRAS	LGEMA164-07	LGEMA-9558	16		730[0n]	2	0	Yes	JN802065			19-Sep-2000	Trogon surrucura				Universidade de Sao Paulo, Departamento de Botanica
BRAS	LGEMA241-07	LGEMA-9813	AMZ252		710[0n]	2	0	Yes	JN802066				Trogon violaceus				Universidade de Sao Paulo, Departamento de Botanica
BRAS	LGEMA161-07	LGEMA-9550	LGEMA-9550		742[0n]	2	0	Yes	JN802067			16-Dec-1997	Trogon viridis				Universidade de Sao Paulo, Departamento de Botanica
BRAS	LGEMA206-07	LGEMA-9649	AMZ088		737[0n]	2	0	Yes	JN802068				Trogon viridis				Universidade de Sao Paulo, Departamento de Botanica
BRAS	LGEMA576-08	LGEMA-605	67		701[0n]	2	0	Yes	JN802069				Turdus albicollis				Universidade de Sao Paulo, Departamento de Botanica
BRAS	BROMB157-06	AJB 4397	AJB 4397	149781	730[0n]	1	3	No	JN802070			25-Nov-1984	Turdus falcklandii	A	ssp:magellanicus		Royal Ontario Museum	voucher type: skin, skeleton
BRAS	LGEMA581-08	LGEMA-3264		MZUSP-76559	743[0n]	2	0	Yes	JN802071				Turdus leucomelas				Universidade de Sao Paulo, Departamento de Botanica
BRAS	LGEMA096-07	LGEMA-2210	300	MZUSP	735[0n]	2	0	Yes	JN802072				Turdus leucomelas				Universidade de Sao Paulo, Departamento de Botanica
BRAS	LGEMA234-07	LGEMA-9782	AMZ221		725[0n]	2	0	Yes	JN802073				Turdus leucomelas				Universidade de Sao Paulo, Departamento de Botanica
BRAS	LGEMA582-08	LGEMA-9783	AMZ222		718[0n]	2	0	Yes	JN802074				Turdus leucomelas				Universidade de Sao Paulo, Departamento de Botanica
BRAS	LGEMA579-08	LGEMA-2806	209		693[0n]	2	0	Yes	JN802075				Turdus leucomelas				Universidade de Sao Paulo, Departamento de Botanica
BRAS	LGEMA039-07	LGEMA-409	18		750[0n]	2	0	Yes	JN802076				Turdus leucomelas				Universidade de Sao Paulo, Departamento de Botanica
BRAS	LGEMA098-07	LGEMA-2402	A0040		737[0n]	2	0	Yes	JN802077				Turdus rufiventris				Universidade de Sao Paulo, Departamento de Botanica
BRAS	LGEMA123-07	LGEMA-2819	237		725[0n]	2	0	Yes	JN802078				Turdus rufiventris				Universidade de Sao Paulo, Departamento de Botanica
BRAS	LGEMA036-07	LGEMA-401	LGEMA-401		752[0n]	2	0	Yes	JN802079				Tyranneutes stolzmanni				Universidade de Sao Paulo, Departamento de Botanica
BRAS	LGEMA117-07	LGEMA-2753	125		760[0n]	2	0	Yes	JN802080				Tyrannus melancholicus				Universidade de Sao Paulo, Departamento de Botanica
BRAS	LGEMA583-08	LGEMA-10336	A0170		728[0n]	2	0	Yes	JN802081				Tyrannus melancholicus				Universidade de Sao Paulo, Departamento de Botanica
BRAS	LGEMA156-07	LGEMA-3608	182		740[0n]	2	0	Yes	JN802082				Veniliornis passerinus				Universidade de Sao Paulo, Departamento de Botanica
BRAS	BROMB868-07	MKP 2695	MKP 2695		760[0n]	2	0	Yes	JN802083			22-Apr-1996	Vireo altiloquus		ssp: altiloquus		Royal Ontario Museum
BRAS	BROMB169-06	MKP 2691	MKP 2691		829[0n]	2	0	Yes	JN802084			21-Apr-1996	Vireo altiloquus		ssp:altiloquus		Royal Ontario Museum
BRAS	BROMB167-06	MKP 2688	MKP 2688		827[0n]	2	0	Yes	JN802085			21-Apr-1996	Vireo altiloquus		ssp:altiloquus		Royal Ontario Museum
BRAS	BROMB860-07	MRW 15	MRW 15		775[0n]	2	0	Yes	JN802086			09-Jul-1996	Vireo crassirostris		ssp: crassirostris		Royal Ontario Museum
BRAS	BROMB859-07	MRW 12	MRW 12		775[0n]	2	0	Yes	JN802087			09-Jul-1996	Vireo crassirostris		ssp: crassirostris		Royal Ontario Museum
BRAS	BROMB290-06	JCB 5734	JCB 5734		716[0n]	2	0	Yes	JN802088			01-Jan-1993	Vireo flavoviridis				Royal Ontario Museum
BRAS	BROMB861-07	331130	2661		752[0n]	2	0	Yes	JN802089			01-Jan-1991	Vireo modestus				Royal Ontario Museum
BRAS	BROMB171-06	MKP 2694	MKP 2694		877[0n]	2	0	Yes	JN802090			22-Apr-1996	Vireo nanus				Royal Ontario Museum
BRAS	BROMB170-06	MKP 2693	MKP 2693		829[0n]	2	0	Yes	JN802091			22-Apr-1996	Vireo nanus				Royal Ontario Museum
BRAS	BROMB866-07	MKP 2692	MKP 2692		857[0n]	2	0	Yes	JN802092			22-Apr-1996	Vireo nanus				Royal Ontario Museum
BRAS	BROMB865-07	MKP 2689	MKP 2689		736[0n]	2	0	Yes	JN802093			21-Apr-1996	Vireo nanus				Royal Ontario Museum
BRAS	LGEMA175-07	LGEMA-9577	AMZ016		747[0n]	2	0	Yes	JN802094				Vireo olivaceus				Universidade de Sao Paulo, Departamento de Botanica
BRAS	LGEMA082-07	LGEMA-1587	16	MZUSP	745[0n]	2	0	Yes	JN802095				Vireo olivaceus				Universidade de Sao Paulo, Departamento de Botanica
BRAS	LGEMA077-07	LGEMA-1381	ITA304		717[0n]	2	0	Yes	JN802096				Vireo olivaceus				Universidade de Sao Paulo, Departamento de Botanica
BRAS	LGEMA585-08	LGEMA-9578		AMZ017	716[0n]	2	0	Yes	JN802097				Vireo olivaceus				Universidade de Sao Paulo, Departamento de Botanica
BRAS	LGEMA584-08	LGEMA-2978	A0104		638[0n]	2	0	Yes	JN802098				Vireo olivaceus				Universidade de Sao Paulo, Departamento de Botanica
BRAS	LGEMA587-08	LGEMA-9624		AMZ063	714[0n]	2	0	Yes	JN802099				Xenopipo atronitens				Universidade de Sao Paulo, Departamento de Botanica
BRAS	LGEMA215-07	LGEMA-9679	AMZ118		758[0n]	2	0	Yes	JN802100				Xenops minutus				Universidade de Sao Paulo, Departamento de Botanica
BRAS	LGEMA588-08	LGEMA-499	970300		696[0n]	1	0	No	JN802101				Xenops rutilans				Universidade de Sao Paulo, Departamento de Botanica
BRAS	LGEMA590-08	LGEMA-2710	30		695[0n]	2	0	Yes	JN802102				Xiphocolaptes falcirostris				Universidade de Sao Paulo, Departamento de Botanica
BRAS	LGEMA188-07	LGEMA-9614	AMZ053		736[0n]	2	0	Yes	JN802103				Xipholena punicea				Universidade de Sao Paulo, Departamento de Botanica
BRAS	LGEMA041-07	LGEMA-424	970032		735[0n]	2	0	Yes	JN802104				Xiphorhynchus elegans				Universidade de Sao Paulo, Departamento de Botanica
BRAS	BROMB292-06	JCB 5726	JCB 5726	157838	714[0n]	2	0	Yes	JN802105			25-May-1993	Xiphorhynchus flavigaster	A	ssp mentalis		Royal Ontario Museum	voucher kind: Skeleton,skin
BRAS	LGEMA081-07	LGEMA-1580		MZUZP	735[0n]	2	0	Yes	JN802106				Xiphorhynchus fuscus				Universidade de Sao Paulo, Departamento de Botanica
BRAS	LGEMA591-08	LGEMA-2654	GSC29		714[0n]	2	0	Yes	JN802107				Xiphorhynchus fuscus				Universidade de Sao Paulo, Departamento de Botanica
BRAS	LGEMA199-07	LGEMA-9637	AMZ076		749[0n]	2	0	Yes	JN802108				Xiphorhynchus guttatus				Universidade de Sao Paulo, Departamento de Botanica
BRAS	LGEMA593-08	LGEMA-3248		MZUSP-76545	738[0n]	2	0	Yes	JN802109				Xiphorhynchus guttatus				Universidade de Sao Paulo, Departamento de Botanica
BRAS	LGEMA592-08	LGEMA-431	970270		701[0n]	3	0	Yes	JN802110				Xiphorhynchus guttatus				Universidade de Sao Paulo, Departamento de Botanica
BRAS	LGEMA176-07	LGEMA-9582	AMZ021		738[0n]	2	0	Yes	JN802111				Xiphorhynchus ocellatus				Universidade de Sao Paulo, Departamento de Botanica
BRAS	ROMC083-07	389677	389677		803[0n]	2	0	Yes	JN802112			16-Nov-1986	Zebrilus undulatus				Field Museum of Natural History	skin and skeleton at Museu Goeldi
BRAS	BROMB625-07	SCL 539	SCL 539	155549	811[0n]	2	2	Yes	JN802113			24-Jan-1989	Zonotrichia capensis	A	ssp:hypoleuca		Royal Ontario Museum	voucher kind: skin; skeleton
BRAS	BROMB627-07	SCL 280	SCL 280	154091	812[0n]	2	2	Yes	JN802114			06-Jan-1988	Zonotrichia capensis	A	ssp:pulacayensis		Royal Ontario Museum	voucher kind: skin; skeleton
BRAS	BROMB624-07	SCL 142	SCL 142	153953	791[0n]	2	2	Yes	JN802115			27-Nov-1987	Zonotrichia capensis	A	ssp:hypoleuca		Royal Ontario Museum	voucher kind: skin; skeleton
BARG	KAARG270-07	MACN-Or-ct 2359		MACN-Or 70448	680[0n]	2	0	Yes	FJ027016			19-Feb-2007	Accipiter bicolor		Bicolored Hawk		Museo Argentino de Ciencias Naturales		Accipiter
BARG	KBAR817-06	MACN-Or-ct 1561	MB 09	MACN-Or 69793	694[0n]	2	0	Yes	FJ027015			02-May-2006	Accipiter bicolor		Bicolored Hawk		Museo Argentino de Ciencias Naturales	Originally entered as "Spiziapteryx circumcinctus (passerinus)"	Accipiter
BARG	KBAR649-06	MACN-Or-ct 708	MBR 6859	KUNHM 96826	694[0n]	2	0	Yes	FJ027014			23-Oct-2005	Accipiter bicolor		Bicolored Hawk		University of Kansas, Natural History Museum		Accipiter
BARG	KAARG400-07	MACN-Or-cp 16		MACN-Or 66949	687[1n]	2	0	Yes	FJ027019			09-Dec-1996	Accipiter erythronemius		Rufous-thighed Hawk		Museo Argentino de Ciencias Naturales		Accipiter
BARG	KAARG399-07	MACN-Or-cp 15		MACN-Or 67670	584[2n]	2	0	Yes	FJ027020			20-Mar-1998	Accipiter erythronemius		Rufous-thighed Hawk		Museo Argentino de Ciencias Naturales		Accipiter
BARG	KBARG057-07	MACN-Or-ct 1723		MACN-Or 69926	694[0n]	2	0	Yes	FJ027018			13-Sep-2006	Accipiter erythronemius		Rufous-thighed Hawk		Museo Argentino de Ciencias Naturales		Accipiter
BARG	KBARG050-07	MACN-Or-ct 1807		MACN-Or 70010	694[0n]	2	0	Yes	FJ027017			10-Oct-2006	Accipiter erythronemius	I	Rufous-thighed Hawk		Museo Argentino de Ciencias Naturales		Accipiter
BARG	KAARG285-07	MACN-Or-ct 2381		MACN-Or 70470	694[0n]	2	0	Yes	FJ027028			26-May-2007	Agelaioides badius		Bay-winged Cowbird		Museo Argentino de Ciencias Naturales		Agelaioides
BARG	KAARG088-07	MACN-Or-ct 1909		MACN-Or 70108	694[0n]	2	0	Yes	FJ027027			22-Nov-2006	Agelaioides badius		Bay-winged Cowbird		Museo Argentino de Ciencias Naturales		Agelaioides
BARG	KAARG606-07	MACN-Or-ct 3235		MACN-Or 70940	675[1n]	2	0	Yes	FJ027025			29-Jul-2007	Agelaioides badius		Bay-winged Cowbird		Museo Argentino de Ciencias Naturales	37.1 g	Agelaioides
BARG	KAARG182-07	MACN-Or-ct 2149		MACN-Or 70238	691[0n]	2	0	Yes	FJ027024			13-May-2007	Agelaioides badius		Bay-winged Cowbird		Museo Argentino de Ciencias Naturales		Agelaioides
BARG	KAARG179-07	MACN-Or-ct 2146		MACN-Or 70235	619[3n]	2	0	Yes	FJ027026			13-May-2007	Agelaioides badius		Bay-winged Cowbird		Museo Argentino de Ciencias Naturales		Agelaioides
BARG	KAARG577-07	MACN-Or-ct 3194		MACN-Or 70899	669[2n]	2	0	Yes	FJ027023			23-Jul-2007	Agelaioides badius	I	Bay-winged Cowbird		Museo Argentino de Ciencias Naturales	36.0 g	Agelaioides
BARG	KBAR841-06	MACN-Or-ct 1594	MB 42	MACN-Or 69339	694[0n]	2	0	Yes	FJ027022			04-May-2006	Agelaioides badius		Bay-winged Cowbird		Museo Argentino de Ciencias Naturales	Molothrus (Agelaioides) badius	Agelaioides
BARG	KBAR840-06	MACN-Or-ct 1593	MB 41	MACN-Or 69338	694[0n]	2	0	Yes	FJ027021			04-May-2006	Agelaioides badius		Bay-winged Cowbird		Museo Argentino de Ciencias Naturales	Molothrus (Agelaioides) badius	Agelaioides
BARG	KAARG244-07	MACN-Or-ct 2240		MACN-Or 70329	694[0n]	2	0	Yes	FJ027065			01-Jun-2007	Amazonetta brasiliensis		Brazilian Teal		Museo Argentino de Ciencias Naturales		Amazonetta
BARG	KAARG235-07	MACN-Or-ct 2226		MACN-Or 70315	678[0n]	2	0	Yes	FJ027064				Amazonetta brasiliensis		Brazilian Teal		Museo Argentino de Ciencias Naturales		Amazonetta
BARG	KAARG232-07	MACN-Or-ct 2219		MACN-Or 70308	678[0n]	2	0	Yes	FJ027063				Amazonetta brasiliensis		Brazilian Teal		Museo Argentino de Ciencias Naturales		Amazonetta
BARG	KAARG222-07	MACN-Or-ct 2198		MACN-Or 70287	666[1n]	2	0	Yes	FJ027060				Amazonetta brasiliensis		Brazilian Teal		Museo Argentino de Ciencias Naturales		Amazonetta
BARG	KBARG009-07	MACN-Or-ct 1759		MACN-Or 69962	694[0n]	2	0	Yes	FJ027059			20-Sep-2006	Amazonetta brasiliensis		Brazilian Teal		Museo Argentino de Ciencias Naturales		Amazonetta
BARG	KBARG074-07	MACN-Or-ct 1757		MACN-Or 69960	694[3n]	2	0	Yes	FJ027062			20-Sep-2006	Amazonetta brasiliensis		Brazilian Teal		Museo Argentino de Ciencias Naturales		Amazonetta
BARG	KBARG041-07	MACN-Or-ct 1758		MACN-Or 69961	694[1n]	2	0	Yes	FJ027061			20-Sep-2006	Amazonetta brasiliensis		Brazilian Teal		Museo Argentino de Ciencias Naturales		Amazonetta
BARG	KBARG067-07	MACN-Or-ct 1331		MACN-Or 69598	694[0n]	2	0	Yes	FJ027075			13-Jul-2006	Anairetes flavirostris		Yellow-billed Tit-Tyrant		Museo Argentino de Ciencias Naturales		Anairetes
BARG	KBARG004-07	MACN-Or-ct 1330		MACN-Or 69597	694[0n]	2	0	Yes	FJ027074			13-Jul-2006	Anairetes flavirostris		Yellow-billed Tit-Tyrant		Museo Argentino de Ciencias Naturales		Anairetes
BARG	KBAR101-06	MACN-Or-ct 1053	KSB 647		694[0n]	2	0	Yes	FJ027076			05-Nov-2005	Anairetes flavirostris		Yellow-billed Tit-Tyrant		Cornell University, Museum of Vertebrates		Anairetes
BARG	KBARG286-07	MACN-Or-ct 2820		MACN-Or 70714	694[0n]	2	0	Yes	FJ027080			18-Nov-2006	Anairetes parulus		Tufted Tit-Tyrant		Museo Argentino de Ciencias Naturales		Anairetes
BARG	KBAR311-06	MACN-Or-ct 680	GFB 3499	MACN-Or 68732	694[0n]	2	0	Yes	FJ027079			24-Jan-2005	Anairetes parulus		Tufted Tit-Tyrant		Museo Argentino de Ciencias Naturales		Anairetes
BARG	KBAR303-06	MACN-Or-ct 550	PRS 2849		694[0n]	2	0	Yes	FJ027078			20-Jan-2005	Anairetes parulus		Tufted Tit-Tyrant		American Museum of Natural History		Anairetes
BARG	KBAR104-06	MACN-Or-ct 850	MBR 6927	KUNHM 96911	694[0n]	2	0	Yes	FJ027077			07-Nov-2005	Anairetes parulus		Tufted Tit-Tyrant		University of Kansas, Natural History Museum		Anairetes
BARG	KBAR622-06	MACN-Or-ct 273		MACN-Or 68969	694[0n]	2	0	Yes	FJ027081			01-Aug-2005	Anas bahamensis		White-cheeked Pintail		Museo Argentino de Ciencias Naturales		Anas
BARG	KAARG027-07	MACN-Or-ct 250		MACN-Or 68973	694[1n]	2	0	Yes	FJ027085			01-Aug-2005	Anas cyanoptera		Cinnamon Teal		Museo Argentino de Ciencias Naturales		Anas
BARG	KAARG196-07	MACN-Or-ct 2164		MACN-Or 70253	694[0n]	2	0	Yes	FJ027086			12-May-2007	Anas cyanoptera		Cinnamon Teal		Museo Argentino de Ciencias Naturales		Anas
BARG	KAARG025-07	MACN-Or-ct 242		MACN-Or 69471	656[0n]	2	0	Yes	FJ027084			11-Jul-2005	Anas cyanoptera		Cinnamon Teal		Museo Argentino de Ciencias Naturales		Anas
BARG	KBAR704-06	MACN-Or-ct 1194	KGM 1142		694[0n]	2	0	Yes	FJ027083			14-Nov-2005	Anas cyanoptera		Cinnamon Teal		University of Alaska Fairbanks		Anas
BARG	KBAR698-06	MACN-Or-ct 1178	KGM 1110		694[0n]	2	0	Yes	FJ027082			08-Nov-2005	Anas cyanoptera		Cinnamon Teal		University of Alaska Fairbanks		Anas
BARG	KBAR715-06	MACN-Or-ct 1233	KGM 1217		694[0n]	2	0	Yes	FJ027091			01-Dec-2005	Anas flavirostris		Speckled Teal		University of Alaska Fairbanks		Anas
BARG	KBAR719-06	MACN-Or-ct 1245	KGM 1229		694[0n]	2	0	Yes	FJ027090			03-Dec-2005	Anas flavirostris		Speckled Teal		University of Alaska Fairbanks		Anas
BARG	KBAR713-06	MACN-Or-ct 1220	KGM 1204		694[0n]	2	0	Yes	FJ027089			26-Nov-2005	Anas flavirostris		Speckled Teal		University of Alaska Fairbanks		Anas
BARG	KBAR703-06	MACN-Or-ct 1189	KGM 1129	MACN-Or 69553	694[0n]	2	0	Yes	FJ027088			13-Nov-2005	Anas flavirostris		Speckled Teal		Museo Argentino de Ciencias Naturales		Anas
BARG	KBAR724-06	MACN-Or-ct 1262	KGM 1246		694[0n]	2	0	Yes	FJ027087			07-Dec-2005	Anas flavirostris		Speckled Teal		University of Alaska Fairbanks		Anas
BARG	KAARG242-07	MACN-Or-ct 2237		MACN-Or 70326	694[0n]	2	0	Yes	FJ027097			01-Jun-2007	Anas georgica		Yellow-billed Pintail		Museo Argentino de Ciencias Naturales		Anas
BARG	KAARG029-07	MACN-Or-ct 271		MACN-Or 68967	694[2n]	2	0	Yes	FJ027096			01-Aug-2005	Anas georgica		Yellow-billed Pintail		Museo Argentino de Ciencias Naturales		Anas
BARG	KBAR726-06	MACN-Or-ct 1265	KGM 1249		694[0n]	2	0	Yes	FJ027095			07-Dec-2005	Anas georgica		Yellow-billed Pintail		University of Alaska Fairbanks		Anas
BARG	KBAR720-06	MACN-Or-ct 1250	KGM 1234		694[0n]	2	0	Yes	FJ027094			04-Dec-2005	Anas georgica		Yellow-billed Pintail		University of Alaska Fairbanks		Anas
BARG	KBAR712-06	MACN-Or-ct 1219	KGM 1203		694[0n]	2	0	Yes	FJ027093			26-Nov-2005	Anas georgica		Yellow-billed Pintail		University of Alaska Fairbanks		Anas
BARG	KBAR693-06	MACN-Or-ct 1165	KGM 1076		694[0n]	2	0	Yes	FJ027092			05-Nov-2005	Anas georgica		Yellow-billed Pintail		University of Alaska Fairbanks		Anas
BARG	KAARG245-07	MACN-Or-ct 2241		MACN-Or 70330	691[4n]	2	0	Yes	FJ027100			01-Jun-2007	Anas platalea		Red Shoveler		Museo Argentino de Ciencias Naturales		Anas
BARG	KAARG240-07	MACN-Or-ct 2235		MACN-Or 70324	691[0n]	2	0	Yes	FJ027099			01-Jun-2007	Anas platalea		Red Shoveler		Museo Argentino de Ciencias Naturales		Anas
BARG	KBAR721-06	MACN-Or-ct 1255	KGM 1239		694[0n]	2	0	Yes	FJ027098			05-Dec-2005	Anas platalea		Red Shoveler		University of Alaska Fairbanks		Anas
BARG	KBAR727-06	MACN-Or-ct 1267	KGM 1079		694[0n]	2	0	Yes	FJ027102			05-Nov-2005	Anas puna		Puna Teal		University of Alaska Fairbanks		Anas
BARG	KBAR694-06	MACN-Or-ct 1167	KGM 1078		694[0n]	2	0	Yes	FJ027101			05-Nov-2005	Anas puna		Puna Teal		University of Alaska Fairbanks		Anas
BARG	KAARG241-07	MACN-Or-ct 2236		MACN-Or 70325	689[0n]	2	0	Yes	FJ027108			01-Jun-2007	Anas sibilatrix		Chiloe Wigeon		Museo Argentino de Ciencias Naturales		Anas
BARG	KAARG028-07	MACN-Or-ct 251		MACN-Or 68970	694[3n]	2	0	Yes	FJ027107			01-Aug-2005	Anas sibilatrix		Chiloe Wigeon		Museo Argentino de Ciencias Naturales		Anas
BARG	KBAR722-06	MACN-Or-ct 1258	KGM 1242		694[0n]	2	0	Yes	FJ027106			05-Dec-2005	Anas sibilatrix		Chiloe Wigeon		University of Alaska Fairbanks		Anas
BARG	KBAR701-06	MACN-Or-ct 1187	KGM 1127		694[0n]	2	0	Yes	FJ027105			13-Nov-2005	Anas sibilatrix		Chiloe Wigeon		University of Alaska Fairbanks		Anas
BARG	KBAR700-06	MACN-Or-ct 1186	KGM 1126		694[0n]	2	0	Yes	FJ027104			13-Nov-2005	Anas sibilatrix		Chiloe Wigeon		University of Alaska Fairbanks		Anas
BARG	KBAR639-06	MACN-Or-ct 577	PRS 2877		694[1n]	2	0	Yes	FJ027103			23-Jan-2005	Anas sibilatrix		Chiloe Wigeon		American Museum of Natural History		Anas
BARG	KBAR718-06	MACN-Or-ct 1244	KGM 1228		694[0n]	2	0	Yes	FJ027112			03-Dec-2005	Anas specularioides		Crested Duck		University of Alaska Fairbanks	Anas (Lophonetta) specularioides	Anas
BARG	KBAR716-06	MACN-Or-ct 1234	KGM 1218		694[0n]	2	0	Yes	FJ027111			02-Dec-2005	Anas specularioides		Crested Duck		University of Alaska Fairbanks	Anas (Lophonetta) specularioides	Anas
BARG	KBAR714-06	MACN-Or-ct 1228	KGM 1212		694[0n]	2	0	Yes	FJ027110			29-Nov-2005	Anas specularioides		Crested Duck		University of Alaska Fairbanks	Anas (Lophonetta) specularioides	Anas
BARG	KBAR708-06	MACN-Or-ct 1199	KGM 1159		694[0n]	2	0	Yes	FJ027113			15-Nov-2005	Anas specularioides		Crested Duck		University of Alaska Fairbanks	Anas (Lophonetta) specularioides	Anas
BARG	KBAR697-06	MACN-Or-ct 1175	KGM 1088		694[1n]	2	0	Yes	FJ027109			07-Nov-2005	Anas specularioides		Crested Duck		University of Alaska Fairbanks	Anas (Lophonetta) specularioides	Anas
BARG	KAARG289-07	MACN-Or-ct 2386		MACN-Or 70475	694[0n]	2	0	Yes	FJ027121			01-Jun-2007	Anas versicolor		Silver Teal		Museo Argentino de Ciencias Naturales		Anas
BARG	KAARG227-07	MACN-Or-ct 2208		MACN-Or 70297	694[0n]	2	0	Yes	FJ027120				Anas versicolor		Silver Teal		Museo Argentino de Ciencias Naturales		Anas
BARG	KAARG226-07	MACN-Or-ct 2207		MACN-Or 70296	694[1n]	2	0	Yes	FJ027119				Anas versicolor		Silver Teal		Museo Argentino de Ciencias Naturales		Anas
BARG	KAARG288-07	MACN-Or-ct 2385		MACN-Or 70474	694[0n]	2	0	Yes	FJ027118			01-Jun-2007	Anas versicolor		Silver Teal		Museo Argentino de Ciencias Naturales		Anas
BARG	KAARG287-07	MACN-Or-ct 2384		MACN-Or 70473	667[0n]	2	0	Yes	FJ027117			01-Jun-2007	Anas versicolor		Silver Teal		Museo Argentino de Ciencias Naturales		Anas
BARG	KAARG218-07	MACN-Or-ct 2192		MACN-Or 70281	677[6n]	2	0	Yes	FJ027116			13-Jun-2007	Anas versicolor		Silver Teal		Museo Argentino de Ciencias Naturales		Anas
BARG	KBAR616-06	MACN-Or-ct 249		MACN-Or 69474	694[0n]	2	0	Yes	FJ027115			01-Aug-2005	Anas versicolor		Silver Teal		Museo Argentino de Ciencias Naturales		Anas
BARG	KBAR615-06	MACN-Or-ct 246		MACN-Or 68975	694[0n]	2	0	Yes	FJ027114			11-Jul-2005	Anas versicolor		Silver Teal		Museo Argentino de Ciencias Naturales		Anas
BARG	KAARG276-07	MACN-Or-ct 2367		MACN-Or 70456	694[0n]	2	0	Yes	FJ027122			02-Apr-2007	Anhinga anhinga		Anhinga		Museo Argentino de Ciencias Naturales		Anhinga
BARG	KAARG002-07	MACN-Or-ct 60		MACN-Or 68512	694[0n]	2	0	Yes	FJ027145			01-Dec-2003	Aramides cajanea		Grey-necked Wood-Rail		Museo Argentino de Ciencias Naturales		Aramides
BARG	KBARG120-07	MACN-Or-ct 1857		MACN-Or 70057	694[0n]	2	0	Yes	FJ027143			25-Oct-2006	Aramides cajanea		Gray-necked Wood-Rail		Museo Argentino de Ciencias Naturales		Aramides
BARG	KBARG158-07	MACN-Or-ct 1828		MACN-Or 70030	694[2n]	2	0	Yes	FJ027144			15-Oct-2006	Aramides cajanea		Gray-necked Wood-Rail		Museo Argentino de Ciencias Naturales		Aramides
BARG	KAARG156-07	MACN-Or-ct 2122		MACN-Or 70211	694[0n]	2	0	Yes	FJ027148			09-May-2007	Aramides ypecaha		Giant Wood-Rail		Museo Argentino de Ciencias Naturales		Aramides
BARG	KBAR845-06	MACN-Or-ct 1599	MB 47	MACN-Or 69818	694[0n]	2	0	Yes	FJ027147			05-May-2006	Aramides ypecaha		Giant Wood-Rail		Museo Argentino de Ciencias Naturales		Aramides
BARG	KBAR835-06	MACN-Or-ct 1588	MB 36	MACN-Or 69812	694[0n]	2	0	Yes	FJ027146			04-May-2006	Aramides ypecaha		Giant Wood-Rail		Museo Argentino de Ciencias Naturales		Aramides
BARG	KAARG065-07	MACN-Or-ct 1778		MACN-Or 69981	694[2n]	2	0	Yes	FJ027151			28-Sep-2006	Aramus guarauna	I	Limpkin		Museo Argentino de Ciencias Naturales		Aramus
BARG	KBAR898-06	MACN-Or-ct 1669	MB 117	MACN-Or 69876	678[0n]	2	0	Yes	FJ027150			21-May-2006	Aramus guarauna		Limpkin		Museo Argentino de Ciencias Naturales		Aramus
BARG	KBAR565-06	MACN-Or-ct 1518		MACN-Or 69758	652[0n]	2	0	Yes	FJ027149			30-Apr-2006	Aramus guarauna		Limpkin		Museo Argentino de Ciencias Naturales		Aramus
BARG	KAARG443-07	MACN-Or-cp 59		MACN-Or 66934	694[0n]	2	0	Yes	FJ027152			25-Sep-1997	Aratinga acuticaudata		Blue-crowned Parakeet		Museo Argentino de Ciencias Naturales		Aratinga
BARG	KAARG444-07	MACN-Or-cp 60		MACN-Or 66958	694[0n]	2	0	Yes	FJ027153			12-Apr-1997	Aratinga acuticaudata		Blue-crowned Parakeet		Museo Argentino de Ciencias Naturales		Aratinga
BARG	KAARG442-07	MACN-Or-cp 58		MACN-Or 68279	694[0n]	2	0	Yes	FJ027154			30-Sep-1996	Aratinga aurea		Peach-fronted Parakeet		Museo Argentino de Ciencias Naturales		Aratinga
BARG	KBAR914-06	MACN-Or-ct 1689	MB 137	MACN-Or 69301	694[0n]	2	0	Yes	FJ027156			26-May-2006	Aratinga leucophthalma		White-eyed Parakeet		Museo Argentino de Ciencias Naturales		Aratinga
BARG	KBAR916-06	MACN-Or-ct 1691	MB 139	MACN-Or 69302	694[0n]	2	0	Yes	FJ027155			26-May-2006	Aratinga leucophthalma		White-eyed Parakeet		Museo Argentino de Ciencias Naturales		Aratinga
BARG	KBAR677-06	MACN-Or-ct 986	FBG 005	MACN-Or 69119	694[0n]	2	0	Yes	FJ027159			28-Oct-2005	Aratinga mitrata		Mitred Parakeet		Museo Argentino de Ciencias Naturales		Aratinga
BARG	KBAR676-06	MACN-Or-ct 984	MJA 153		694[0n]	2	0	Yes	FJ027158			28-Oct-2005	Aratinga mitrata		Mitred Parakeet		Cornell University, Museum of Vertebrates		Aratinga
BARG	KBAR655-06	MACN-Or-ct 773	MBR 6895	KUNHM 96822	694[0n]	2	0	Yes	FJ027157			28-Oct-2005	Aratinga mitrata		Mitred Parakeet		University of Kansas, Natural History Museum		Aratinga
BARG	KAARG294-07	MACN-Or-ct 2393		MACN-Or 70482	694[0n]	2	0	Yes	FJ027171			07-Jun-2007	Arremon flavirostris		Saffron-billed Sparrow		Museo Argentino de Ciencias Naturales		Arremon
BARG	KBARG375-07	MACN-Or-ct 2964		MACN-Or 69256	694[0n]	2	0	Yes	FJ027166			16-Dec-2006	Arremon flavirostris		Saffron-billed Sparrow		Museo Argentino de Ciencias Naturales		Arremon
BARG	KBAR768-06	MACN-Or-ct 1388		MACN-Or 69636	694[0n]	2	0	Yes	FJ027170			26-Apr-2006	Arremon flavirostris		Saffron-billed Sparrow		Museo Argentino de Ciencias Naturales		Arremon
BARG	KBAR925-06	MACN-Or-ct 1700	MB 148	MACN-Or 69904	694[0n]	2	0	Yes	FJ027169			29-May-2006	Arremon flavirostris		Saffron-billed Sparrow		Museo Argentino de Ciencias Naturales		Arremon
BARG	KBAR227-06	MACN-Or-ct 887	MDE 208	KUNHM 96927	694[0n]	2	0	Yes	FJ027168			11-Nov-2005	Arremon flavirostris		Saffron-billed Sparrow		University of Kansas, Natural History Museum		Arremon
BARG	KBAR225-06	MACN-Or-ct 1140	PB 032	MACN-Or 69204	694[0n]	2	0	Yes	FJ027167			12-Nov-2005	Arremon flavirostris		Saffron-billed Sparrow		Museo Argentino de Ciencias Naturales		Arremon
BARG	KBAR226-06	MACN-Or-ct 1143	MJA 206		694[1n]	2	0	Yes	FJ027165			12-Nov-2005	Arremon flavirostris		Saffron-billed Sparrow		Cornell University, Museum of Vertebrates		Arremon
BARG	KBARG363-07	MACN-Or-ct 2862		MACN-Or 70736	694[0n]	2	0	Yes	FJ027216			09-Dec-2006	Automolus leucophthalmus	I	White-eyed Foliage-gleaner		Museo Argentino de Ciencias Naturales		Automolus
BARG	KBARG339-07	MACN-Or-ct 2858		MACN-Or 69221	694[0n]	2	0	Yes	FJ027215			09-Dec-2006	Automolus leucophthalmus		White-eyed Foliage-gleaner		Museo Argentino de Ciencias Naturales		Automolus
BARG	KBARG316-07	MACN-Or-ct 2841		MACN-Or 69246	694[0n]	2	0	Yes	FJ027214			06-Dec-2006	Automolus leucophthalmus		White-eyed Foliage-gleaner		Museo Argentino de Ciencias Naturales		Automolus
BARG	KBARG315-07	MACN-Or-ct 2855		MACN-Or 69247	694[0n]	2	0	Yes	FJ027213			08-Dec-2006	Automolus leucophthalmus		White-eyed Foliage-gleaner		Museo Argentino de Ciencias Naturales		Automolus
BARG	KBARG323-07	MACN-Or-ct 2856		MACN-Or 70735	694[0n]	2	0	Yes	FJ027217			08-Dec-2006	Baryphthengus ruficapillus		Rufous-capped Motmot		Museo Argentino de Ciencias Naturales		Baryphthengus
BARG	KBARG389-07	MACN-Or-ct 2950		MACN-Or 70780	685[1n]	2	0	Yes	FJ027219			14-Dec-2006	Baryphthengus ruficapillus		Rufous-capped Motmot		Museo Argentino de Ciencias Naturales		Baryphthengus
BARG	KBARG372-07	MACN-Or-ct 2850		MACN-Or 69259	685[0n]	2	0	Yes	FJ027218			07-Dec-2006	Baryphthengus ruficapillus	I	Rufous-capped Motmot		Museo Argentino de Ciencias Naturales		Baryphthengus
BARG	KBAR336-06	MACN-Or-ct 912	MDE 222		694[0n]	2	0	Yes	FJ027221			13-Nov-2005	Basileuterus bivittatus		Two-banded Warbler		Cornell University, Museum of Vertebrates		Basileuterus
BARG	KBAR209-06	MACN-Or-ct 720	MBR 6865	KUNHM 96857	694[0n]	2	0	Yes	FJ027220			24-Oct-2005	Basileuterus bivittatus		Two-banded Warbler		University of Kansas, Natural History Museum		Basileuterus
BARG	KBARG393-07	MACN-Or-ct 2951		MACN-Or 69230	694[0n]	2	0	Yes	FJ027223			14-Dec-2006	Basileuterus culicivorus		Golden-crowned Warbler		Museo Argentino de Ciencias Naturales		Basileuterus
BARG	KBARG305-07	MACN-Or-ct 2887		MACN-Or 70747	694[0n]	2	0	Yes	FJ027222			10-Dec-2006	Basileuterus culicivorus		Golden-crowned Warbler		Museo Argentino de Ciencias Naturales		Basileuterus
BARG	KBAR833-06	MACN-Or-ct 1585	MB 33	MACN-Or 69811	694[2n]	4	0	Yes	FJ027225			04-May-2006	Basileuterus leucoblepharus		White-rimmed Warbler		Museo Argentino de Ciencias Naturales		Basileuterus
BARG	KBAR893-06	MACN-Or-ct 1663	MB 111	MACN-Or 69870	694[0n]	2	0	Yes	FJ027224			19-May-2006	Basileuterus leucoblepharus		White-rimmed Warbler		Museo Argentino de Ciencias Naturales		Basileuterus
BARG	KBAR347-06	MACN-Or-ct 994	KSB 626		694[4n]	4	0	Yes	FJ027227			28-Oct-2005	Basileuterus signatus		Pale-legged Warbler		Cornell University, Museum of Vertebrates		Basileuterus
BARG	KBAR211-06	MACN-Or-ct 790	MBR 6898	KUNHM 96858	694[1n]	4	0	Yes	FJ027226			29-Oct-2005	Basileuterus signatus		Pale-legged Warbler		University of Kansas, Natural History Museum		Basileuterus
BARG	KBAR837-06	MACN-Or-ct 1590	MB 38	MACN-Or 69814	694[0n]	2	0	Yes	FJ027234			04-May-2006	Bubulcus ibis		Cattle Egret		Museo Argentino de Ciencias Naturales		Bubulcus
BARG	KBAR809-06	MACN-Or-ct 1539		MACN-Or 69774	694[0n]	2	0	Yes	FJ027233			01-May-2006	Bubulcus ibis		Cattle Egret		Museo Argentino de Ciencias Naturales		Bubulcus
BARG	KBAR808-06	MACN-Or-ct 1538		MACN-Or 69773	694[0n]	2	0	Yes	FJ027232			01-May-2006	Bubulcus ibis		Cattle Egret		Museo Argentino de Ciencias Naturales		Bubulcus
BARG	KAARG272-07	MACN-Or-ct 2361		MACN-Or 70450	694[0n]	2	0	Yes	FJ027236			21-Feb-2007	Buteo albicaudatus		White-tailed Hawk		Museo Argentino de Ciencias Naturales		Buteo
BARG	KBAR680-06	MACN-Or-ct 993	MJA 155	MACN-Or 69116	694[0n]	2	0	Yes	FJ027239			29-Oct-2005	Buteo leucorrhous		White-rumped Hawk		Museo Argentino de Ciencias Naturales		Buteo
BARG	KBAR679-06	MACN-Or-ct 992	FBG 006		694[0n]	2	0	Yes	FJ027238			29-Oct-2005	Buteo leucorrhous		White-rumped Hawk		Cornell University, Museum of Vertebrates		Buteo
BARG	KAARG114-07	MACN-Or-ct 1947		MACN-Or 70146	694[0n]	2	0	Yes	FJ027237			06-Jun-2007	Buteo magnirostris		Roadside Hawk		Museo Argentino de Ciencias Naturales		Buteo
BARG	KBARG407-07	MACN-Or-ct 3045		MACN-Or 69240	694[0n]	2	0	Yes	FJ027242			07-Sep-2006	Buteo magnirostris		Roadside Hawk		Museo Argentino de Ciencias Naturales		Buteo
BARG	KBARG077-07	MACN-Or-ct 061		MACN-Or 68550	694[0n]	2	0	Yes	FJ027241			28-Apr-2004	Buteo magnirostris		Roadside Hawk		Museo Argentino de Ciencias Naturales		Buteo
BARG	KBARG010-07	MACN-Or-ct 265		MACN-Or 68921	694[3n]	2	0	Yes	FJ027240			05-Jun-2005	Buteo magnirostris		Roadside Hawk		Museo Argentino de Ciencias Naturales		Buteo
BARG	KBAR778-06	MACN-Or-ct 1424		MACN-Or 69668	694[0n]	2	0	Yes	FJ027244			27-Apr-2006	Buteo magnirostris		Roadside Hawk		Museo Argentino de Ciencias Naturales		Buteo
BARG	KBAR758-06	MACN-Or-ct 1367		MACN-Or 69631	694[0n]	2	0	Yes	FJ027243			26-Apr-2006	Buteo magnirostris		Roadside Hawk		Museo Argentino de Ciencias Naturales		Buteo
BARG	KBAR691-06	MACN-Or-ct 1113	KSB 666		694[0n]	2	0	Yes	FJ027250			09-Nov-2005	Buteo polyosoma		Red-backed Hawk		Cornell University, Museum of Vertebrates		Buteo
BARG	KAARG139-07	MACN-Or-ct 2095		MACN-Or 70185	694[0n]	2	0	Yes	FJ027248			29-Dec-2006	Buteogallus meridionalis		Savanna Hawk		Museo Argentino de Ciencias Naturales		Buteogallus
BARG	KAARG117-07	MACN-Or-ct 2063		MACN-Or 70153	694[0n]	2	0	Yes	FJ027247			20-Nov-2006	Buteogallus meridionalis		Savanna Hawk		Museo Argentino de Ciencias Naturales		Buteogallus
BARG	KAARG267-07	MACN-Or-ct 2352		MACN-Or 70441	694[0n]	2	0	Yes	FJ027249			08-Feb-2007	Buteogallus meridionalis		Savanna Hawk		Museo Argentino de Ciencias Naturales		Buteogallus
BARG	KAARG271-07	MACN-Or-ct 2360		MACN-Or 70449	689[0n]	2	0	Yes	FJ027246			19-Feb-2007	Buteogallus urubitinga		Great Black-Hawk		Museo Argentino de Ciencias Naturales		Buteogallus
BARG	KBARG016-07	MACN-Or-ct 1777		MACN-Or 69980	694[0n]	2	0	Yes	FJ027245			27-Sep-2006	Buteogallus urubitinga		Great Black-Hawk		Museo Argentino de Ciencias Naturales		Buteogallus
BARG	KBAR913-06	MACN-Or-ct 1687	MB 135	MACN-Or 69893	694[0n]	2	0	Yes	FJ027251			23-May-2006	Buteogallus urubitinga		Great Black-Hawk		Museo Argentino de Ciencias Naturales		Buteogallus
BARG	KBARG089-07	MACN-Or-ct 1793		MACN-Or 69996	694[0n]	2	0	Yes	FJ027253			03-Oct-2006	Butorides striata		Striated Heron		Museo Argentino de Ciencias Naturales		Butorides
BARG	KBARG083-07	MACN-Or-ct 1805		MACN-Or 70008	694[0n]	2	0	Yes	FJ027252			09-Oct-2006	Butorides striata		Striated Heron		Museo Argentino de Ciencias Naturales		Butorides
BARG	KBARG030-07	MACN-Or-ct 1783		MACN-Or 69986	694[5n]	2	0	Yes	FJ027254			29-Sep-2006	Butorides striata		Striated Heron		Museo Argentino de Ciencias Naturales		Butorides
BARG	KAARG601-07	MACN-Or-ct 3229		MACN-Or 70934	673[2n]	2	0	Yes	FJ027261			28-Jul-2007	Cacicus chrysopterus		Golden-winged Cacique		Museo Argentino de Ciencias Naturales		Cacicus
BARG	KAARG541-07	MACN-Or-ct 3146		MACN-Or 70851	670[0n]	2	0	Yes	FJ027260			18-Jul-2007	Cacicus chrysopterus	A	Golden-winged Cacique		Museo Argentino de Ciencias Naturales	38.7 g	Cacicus
BARG	KBAR791-06	MACN-Or-ct 1456		MACN-Or 69697	694[0n]	2	0	Yes	FJ027259			28-Apr-2006	Cacicus chrysopterus		Golden-winged Cacique		Museo Argentino de Ciencias Naturales		Cacicus
BARG	KBAR773-06	MACN-Or-ct 1402		MACN-Or 69646	694[0n]	2	0	Yes	FJ027258			27-Apr-2006	Cacicus chrysopterus		Golden-winged Cacique		Museo Argentino de Ciencias Naturales		Cacicus
BARG	KBAR345-06	MACN-Or-ct 989	MJA 154		694[0n]	2	0	Yes	FJ027257			28-Oct-2005	Cacicus chrysopterus		Golden-winged Cacique		Cornell University, Museum of Vertebrates		Cacicus
BARG	KBAR296-06	MACN-Or-ct 784	MDE 153	MACN-Or 69084	694[0n]	2	0	Yes	FJ027256			28-Oct-2005	Cacicus chrysopterus		Golden-winged Cacique		Museo Argentino de Ciencias Naturales		Cacicus
BARG	KBAR297-06	MACN-Or-ct 987	PB 010	MACN-Or 69140	694[0n]	2	0	Yes	FJ027255			28-Oct-2005	Cacicus chrysopterus		Golden-winged Cacique		Museo Argentino de Ciencias Naturales		Cacicus
BARG	KBARG346-07	MACN-Or-ct 2878		MACN-Or 70742	694[0n]	2	0	Yes	FJ027262			10-Dec-2006	Cacicus haemorrhous		Red-rumped Cacique		Museo Argentino de Ciencias Naturales		Cacicus
BARG	KBARG303-07	MACN-Or-ct 2918		MACN-Or-pict 2918 (picture)	672[0n]	2	0	Yes	FJ027263			12-Dec-2006	Cacicus haemorrhous		Red-rumped Cacique		Museo Argentino de Ciencias Naturales		Cacicus
BARG	KBAR513-06	MACN-Or-ct 1429		MACN-Or 69673	694[0n]	2	0	Yes	FJ027265			27-Apr-2006	Cacicus solitarius		Solitary Cacique		Museo Argentino de Ciencias Naturales		Cacicus
BARG	KBAR497-06	MACN-Or-ct 1403		MACN-Or 69647	694[0n]	2	0	Yes	FJ027264			27-Apr-2006	Cacicus solitarius		Solitary Cacique		Museo Argentino de Ciencias Naturales		Cacicus
BARG	KAARG141-07	MACN-Or-ct 2102		MACN-Or 69315	694[0n]	2	0	Yes	FJ027285			11-Jan-2007	Campephilus leucopogon		Cream-backed Woodpecker		Museo Argentino de Ciencias Naturales		Campephilus
BARG	KBAR857-06	MACN-Or-ct 1618	MB 66	MACN-Or 69365	694[0n]	2	0	Yes	FJ027284			08-May-2006	Campephilus leucopogon		Cream-backed Woodpecker		Museo Argentino de Ciencias Naturales		Campephilus
BARG	KBAR930-06	MACN-Or-ct 1708	MB 156	MACN-Or 69912	694[0n]	2	0	Yes	FJ027283			30-May-2006	Campephilus leucopogon		Cream-backed Woodpecker		Museo Argentino de Ciencias Naturales		Campephilus
BARG	KBAR029-06	MACN-Or-ct 974	KSB 616		694[0n]	2	0	Yes	FJ027282			27-Oct-2005	Campephilus leucopogon		Cream-backed Woodpecker		Cornell University, Museum of Vertebrates		Campephilus
BARG	KBAR027-06	MACN-Or-ct 721	MBR 6866	KUNHM 96827	694[0n]	2	0	Yes	FJ027281			24-Oct-2005	Campephilus leucopogon		Cream-backed Woodpecker		University of Kansas, Natural History Museum		Campephilus
BARG	KBAR028-06	MACN-Or-ct 788	MDE 156	MACN-Or 69073	694[0n]	2	0	Yes	FJ027280			29-Oct-2005	Campephilus leucopogon		Cream-backed Woodpecker		Museo Argentino de Ciencias Naturales		Campephilus
BARG	KBAR450-06	MACN-Or-ct 705	GFB 3524		694[1n]	2	0	Yes	FJ027288			28-Jan-2005	Campephilus magellanicus		Magellanic Woodpecker		American Museum of Natural History		Campephilus
BARG	KBAR449-06	MACN-Or-ct 696	GFB 3515	MACN-Or 68698	694[0n]	2	0	Yes	FJ027287			13-Mar-1998	Campephilus magellanicus		Magellanic Woodpecker		Museo Argentino de Ciencias Naturales		Campephilus
BARG	KBAR438-06	MACN-Or-ct 618	PRS 2918		694[0n]	2	0	Yes	FJ027286			28-Jan-2005	Campephilus magellanicus		Magellanic Woodpecker		American Museum of Natural History		Campephilus
BARG	KAARG624-07	MACN-Or-ct 3274		MACN-Or 70979	674[0n]	2	0	Yes	FJ027293			02-Aug-2007	Campylorhamphus trochilirostris		Red-billed Scythebill		Museo Argentino de Ciencias Naturales	43.0 g	Campylorhamphus
BARG	KAARG136-07	MACN-Or-ct 2092		MACN-Or 70182	689[3n]	2	0	Yes	FJ027292			26-Dec-2006	Campylorhamphus trochilirostris		Red-billed Scythebill		Museo Argentino de Ciencias Naturales		Campylorhamphus
BARG	KAARG570-07	MACN-Or-ct 3186		MACN-Or 70891	664[0n]	2	0	Yes	FJ027291			22-Jul-2007	Campylorhamphus trochilirostris	A	Red-billed Scythebill		Museo Argentino de Ciencias Naturales	40.2 g	Campylorhamphus
BARG	KAARG143-07	MACN-Or-ct 2105		MACN-Or 70194	694[0n]	2	0	Yes	FJ027295			20-Jan-2007	Caprimulgus parvulus		Little Nightjar		Museo Argentino de Ciencias Naturales		Caprimulgus
BARG	KAARG129-07	MACN-Or-ct 2082		MACN-Or 70172	694[4n]	2	0	Yes	FJ027294			07-Dec-2006	Caprimulgus parvulus		Little Nightjar		Museo Argentino de Ciencias Naturales		Caprimulgus
BARG	KBARG093-07	MACN-Or-ct 1784		MACN-Or 69987	694[0n]	2	0	Yes	FJ027298			29-Sep-2006	Caracara plancus		Southern Caracara		Museo Argentino de Ciencias Naturales	Originally placed in the genus Polyborus	Caracara
BARG	KBARG036-07	MACN-Or-ct 1767		MACN-Or 69970	694[0n]	2	0	Yes	FJ027297			22-Sep-2006	Caracara plancus		Southern Caracara		Museo Argentino de Ciencias Naturales	Originally placed in the genus Polyborus	Caracara
BARG	KBARG013-07	MACN-Or-ct 1753		MACN-Or 69956	694[0n]	2	0	Yes	FJ027296			19-Sep-2006	Caracara plancus		Southern Caracara		Museo Argentino de Ciencias Naturales	Originally placed in the genus Polyborus	Caracara
BARG	KBAR741-06	MACN-Or-ct 1298	KGM 1108	MACN-Or 69567	694[0n]	2	0	Yes	FJ027302			08-Nov-2005	Carduelis atrata		Black Siskin		Museo Argentino de Ciencias Naturales		Carduelis
BARG	KBAR350-06	MACN-Or-ct 1086	MJA 187		694[0n]	2	0	Yes	FJ027301			08-Nov-2005	Carduelis atrata		Black Siskin		Cornell University, Museum of Vertebrates		Carduelis
BARG	KBAR324-06	MACN-Or-ct 870	MDE 199	KUNHM 96924	694[0n]	2	0	Yes	FJ027300			08-Nov-2005	Carduelis atrata		Black Siskin		University of Kansas, Natural History Museum		Carduelis
BARG	KBAR321-06	MACN-Or-ct 858	MBR 6931	KUNHM 96923	694[0n]	2	0	Yes	FJ027299			07-Nov-2005	Carduelis atrata		Black Siskin		University of Kansas, Natural History Museum		Carduelis
BARG	KBAR447-06	MACN-Or-ct 691	GFB 3510		694[0n]	2	0	Yes	FJ027304			25-Jan-2005	Carduelis barbata		Black-chinned Siskin		American Museum of Natural History		Carduelis
BARG	KBAR424-06	MACN-Or-ct 537	PRS 2836		694[0n]	2	0	Yes	FJ027303			19-Jan-2005	Carduelis barbata		Black-chinned Siskin		American Museum of Natural History		Carduelis
BARG	KBAR328-06	MACN-Or-ct 879	MBR 6943	KUNHM 96921	694[0n]	2	0	Yes	FJ027307			09-Nov-2005	Carduelis crassirostris		Thick-billed Siskin		University of Kansas, Natural History Museum		Carduelis
BARG	KBAR325-06	MACN-Or-ct 872	MDE 201	KUNHM 97385	694[0n]	2	0	Yes	FJ027306			09-Nov-2005	Carduelis crassirostris		Thick-billed Siskin		University of Kansas, Natural History Museum		Carduelis
BARG	KBAR222-06	MACN-Or-ct 1071	MJA 181		694[0n]	2	0	Yes	FJ027305			07-Nov-2005	Carduelis crassirostris		Thick-billed Siskin		Cornell University, Museum of Vertebrates		Carduelis
BARG	KAARG206-07	MACN-Or-ct 2177		MACN-Or 70266	678[3n]	2	0	Yes	FJ027311			13-Jun-2007	Carduelis magellanica		Hooded Siskin		Museo Argentino de Ciencias Naturales		Carduelis
BARG	KBARG078-07	MACN-Or-ct 1729		MACN-Or 69932	694[0n]	2	0	Yes	FJ027310			13-Sep-2006	Carduelis magellanica		Hooded Siskin		Museo Argentino de Ciencias Naturales		Carduelis
BARG	KBAR545-06	MACN-Or-ct 1491		MACN-Or 69733	694[0n]	2	0	Yes	FJ027309			29-Apr-2006	Carduelis magellanica		Hooded Siskin		Museo Argentino de Ciencias Naturales		Carduelis
BARG	KBAR473-06	MACN-Or-ct 1314	KGM 1185	MACN-Or 69581	694[0n]	2	0	Yes	FJ027308			18-Nov-2005	Carduelis magellanica		Hooded Siskin		Museo Argentino de Ciencias Naturales		Carduelis
BARG	KBAR885-06	MACN-Or-ct 1653	MB 101	MACN-Or 69862	694[0n]	2	0	Yes	FJ027314			17-May-2006	Casiornis rufus		Rufous Casiornis		Museo Argentino de Ciencias Naturales		Casiornis
BARG	KBAR880-06	MACN-Or-ct 1648	MB 96	MACN-Or 69858	694[0n]	2	0	Yes	FJ027313			15-May-2006	Casiornis rufus		Rufous Casiornis		Museo Argentino de Ciencias Naturales		Casiornis
BARG	KBAR926-06	MACN-Or-ct 1701	MB 149	MACN-Or 69905	694[0n]	2	0	Yes	FJ027312			29-May-2006	Casiornis rufus		Rufous Casiornis		Museo Argentino de Ciencias Naturales		Casiornis
BARG	KBARG049-07	MACN-Or-ct 1742		MACN-Or 69945	694[0n]	2	0	Yes	FJ027322			15-Sep-2006	Cathartes burrovianus		Lesser Yellow-headed Vulture		Museo Argentino de Ciencias Naturales		Cathartes
BARG	KBAR800-06	MACN-Or-ct 1494		MACN-Or 69736	694[0n]	2	0	Yes	FJ027321			29-Apr-2006	Cathartes burrovianus		Lesser Yellow-headed Vulture		Museo Argentino de Ciencias Naturales		Cathartes
BARG	KAARG286-07	MACN-Or-ct 2382		MACN-Or 70471	694[0n]	2	0	Yes	FJ027329			28-May-2007	Celeus lugubris		Pale-crested Woodpecker		Museo Argentino de Ciencias Naturales		Celeus
BARG	KBARG129-07	MACN-Or-ct 1876		MACN-Or 70075	694[0n]	2	0	Yes	FJ027328			01-Nov-2006	Celeus lugubris		Pale-crested Woodpecker		Museo Argentino de Ciencias Naturales		Celeus
BARG	KBARG084-07	MACN-Or-ct 1736		MACN-Or 69939	694[0n]	2	0	Yes	FJ027327			14-Sep-2006	Celeus lugubris		Pale-crested Woodpecker		Museo Argentino de Ciencias Naturales		Celeus
BARG	KAARG204-07	MACN-Or-ct 2175		MACN-Or 70264	679[5n]	2	0	Yes	FJ027335			13-Jun-2007	Certhiaxis cinnamomeus		Yellow-chinned Spinetail		Museo Argentino de Ciencias Naturales		Certhiaxis
BARG	KAARG201-07	MACN-Or-ct 2170		MACN-Or 70259	682[0n]	1	0	No	FJ027334			13-Jun-2007	Certhiaxis cinnamomeus		Yellow-chinned Spinetail		Museo Argentino de Ciencias Naturales		Certhiaxis
BARG	KAARG189-07	MACN-Or-ct 2157		MACN-Or 70246	694[1n]	2	0	Yes	FJ027333			15-May-2007	Certhiaxis cinnamomeus		Yellow-chinned Spinetail		Museo Argentino de Ciencias Naturales		Certhiaxis
BARG	KBAR540-06	MACN-Or-ct 1479		MACN-Or 69721	693[0n]	2	0	Yes	FJ027332			29-Apr-2006	Certhiaxis cinnamomeus		Yellow-chinned Spinetail		Museo Argentino de Ciencias Naturales		Certhiaxis
BARG	KBAR830-06	MACN-Or-ct 1579	MB 27	MACN-Or 69807	694[0n]	2	0	Yes	FJ027331			03-May-2006	Certhiaxis cinnamomeus		Yellow-chinned Spinetail		Museo Argentino de Ciencias Naturales		Certhiaxis
BARG	KBAR543-06	MACN-Or-ct 1485		MACN-Or 69727	694[0n]	2	0	Yes	FJ027330			29-Apr-2006	Certhiaxis cinnamomeus		Yellow-chinned Spinetail		Museo Argentino de Ciencias Naturales		Certhiaxis
BARG	KBAR008-06	MACN-Or-ct 1088	MJA 190		694[0n]	2	0	Yes	FJ027341			08-Nov-2005	Charadrius alticola		Puna Plover		Cornell University, Museum of Vertebrates		Charadrius
BARG	KBAR009-06	MACN-Or-ct 1101	KSB 664	MACN-Or 69026	694[0n]	2	0	Yes	FJ027340			09-Nov-2005	Charadrius alticola		Puna Plover		Museo Argentino de Ciencias Naturales		Charadrius
BARG	KBAR738-06	MACN-Or-ct 1294	KGM 1133	MACN-Or 69564	694[0n]	2	0	Yes	FJ027339			13-Nov-2005	Charadrius alticola		Puna Plover		Museo Argentino de Ciencias Naturales		Charadrius
BARG	KBAR736-06	MACN-Or-ct 1288	KGM 1124	MACN-Or 69560	645[1n]	2	0	Yes	FJ027338			12-Nov-2005	Charadrius alticola		Puna Plover		Museo Argentino de Ciencias Naturales		Charadrius
BARG	KBAR322-06	MACN-Or-ct 860	MDE 194	KUNHM 97231	657[0n]	2	0	Yes	FJ027337			08-Nov-2005	Charadrius alticola		Puna Plover		University of Kansas, Natural History Museum		Charadrius
BARG	KBARG045-07	MACN-Or-ct 1751		MACN-Or 69954	694[0n]	2	0	Yes	FJ027344			19-Sep-2006	Charadrius collaris		Collared Plover		Museo Argentino de Ciencias Naturales		Charadrius
BARG	KBAR521-06	MACN-Or-ct 1446		MACN-Or 69690	694[0n]	2	0	Yes	FJ027343			28-Apr-2006	Charadrius collaris		Collared Plover		Museo Argentino de Ciencias Naturales		Charadrius
BARG	KBAR520-06	MACN-Or-ct 1445		MACN-Or 69689	694[0n]	2	0	Yes	FJ027342			28-Apr-2006	Charadrius collaris		Collared Plover		Museo Argentino de Ciencias Naturales		Charadrius
BARG	KAARG036-07	MACN-Or-ct 306		MACN-Or 69490	688[0n]	2	0	Yes	FJ027346			01-Dec-2004	Charadrius falklandicus		Two-banded Plover		Museo Argentino de Ciencias Naturales		Charadrius
BARG	KAARG008-07	MACN-Or-ct 144		MACN-Or 69390	694[1n]	2	0	Yes	FJ027345			01-Dec-2004	Charadrius falklandicus		Two-banded Plover		Museo Argentino de Ciencias Naturales		Charadrius
BARG	KAARG371-07	MACN-Or-ct 3346		MACN-Or 71026	694[0n]	2	0	Yes	FJ027348			18-Jul-2007	Charadrius modestus		Rufous-chested Dotterel		Museo Argentino de Ciencias Naturales		Charadrius
BARG	KAARG370-07	MACN-Or-ct 3345		MACN-Or 71025	694[0n]	2	0	Yes	FJ027347			18-Jul-2007	Charadrius modestus		Rufous-chested Dotterel		Museo Argentino de Ciencias Naturales		Charadrius
BARG	KBARG383-07	MACN-Or-ct 2979		MACN-Or 69223	694[0n]	2	0	Yes	FJ027351			19-Dec-2006	Chiroxiphia caudata		Blue Manakin		Museo Argentino de Ciencias Naturales		Chiroxiphia
BARG	KBARG147-07	MACN-Or-ct 1989	GSC 138	MACN-Or 69286	694[0n]	2	0	Yes	FJ027350			20-Oct-2006	Chiroxiphia caudata		Blue Manakin		Museo Argentino de Ciencias Naturales		Chiroxiphia
BARG	KBARG115-07	MACN-Or-ct 1980	GSC 129	MACN-Or 69287	694[0n]	2	0	Yes	FJ027349			20-Oct-2006	Chiroxiphia caudata		Blue Manakin		Museo Argentino de Ciencias Naturales		Chiroxiphia
BARG	KBAR642-06	MACN-Or-ct 652	GFB 3471		694[0n]	2	0	Yes	FJ027353			21-Jan-2005	Chloephaga picta		Upland Goose		American Museum of Natural History		Chloephaga
BARG	KBAR635-06	MACN-Or-ct 564	PRS 2864		694[0n]	2	0	Yes	FJ027352			21-Jan-2005	Chloephaga picta		Upland Goose		American Museum of Natural History		Chloephaga
BARG	KBAR725-06	MACN-Or-ct 1264	KGM 1248		694[0n]	2	0	Yes	FJ027355			07-Dec-2005	Chloephaga poliocephala		Ashy-headed Goose		University of Alaska Fairbanks		Chloephaga
BARG	KBAR723-06	MACN-Or-ct 1261	KGM 1245		694[0n]	2	0	Yes	FJ027354			07-Dec-2005	Chloephaga poliocephala		Ashy-headed Goose		University of Alaska Fairbanks		Chloephaga
BARG	KBAR883-06	MACN-Or-ct 1651	MB 99	MACN-Or 69318	694[0n]	2	0	Yes	FJ027358			16-May-2006	Chloroceryle amazona		Amazon Kingfisher		Museo Argentino de Ciencias Naturales		Chloroceryle
BARG	KBAR879-06	MACN-Or-ct 1647	MB 95	MACN-Or 69857	694[0n]	2	0	Yes	FJ027357			15-May-2006	Chloroceryle amazona		Amazon Kingfisher		Museo Argentino de Ciencias Naturales		Chloroceryle
BARG	KBAR870-06	MACN-Or-ct 1635	MB 83	MACN-Or 69845	694[0n]	2	0	Yes	FJ027356			10-May-2006	Chloroceryle amazona		Amazon Kingfisher		Museo Argentino de Ciencias Naturales		Chloroceryle
BARG	KBARG370-07	MACN-Or-ct 2882		MACN-Or 70744	694[0n]	2	0	Yes	FJ027361			10-Dec-2006	Chloroceryle americana	I	Green Kingfisher		Museo Argentino de Ciencias Naturales		Chloroceryle
BARG	KBARG295-07	MACN-Or-ct 2916		MACN-Or 69238	694[0n]	2	0	Yes	FJ027360			12-Dec-2006	Chloroceryle americana		Green Kingfisher		Museo Argentino de Ciencias Naturales		Chloroceryle
BARG	KBAR503-06	MACN-Or-ct 1410		MACN-Or 69654	694[1n]	2	0	Yes	FJ027359			27-Apr-2006	Chloroceryle americana		Green Kingfisher		Museo Argentino de Ciencias Naturales		Chloroceryle
BARG	KBAR671-06	MACN-Or-ct 956	ASB 006	MACN-Or 69115	694[0n]	2	0	Yes	FJ027365			25-Oct-2005	Chlorospingus ophthalmicus		Common Bush-Tanager		Museo Argentino de Ciencias Naturales		Chlorospingus
BARG	KBAR340-06	MACN-Or-ct 944	MJA 124		694[0n]	2	0	Yes	FJ027364			25-Oct-2005	Chlorospingus ophthalmicus		Common Bush-Tanager		Cornell University, Museum of Vertebrates		Chlorospingus
BARG	KBAR240-06	MACN-Or-ct 775	MDE 144	KUNHM 97381	694[0n]	2	0	Yes	FJ027363			28-Oct-2005	Chlorospingus ophthalmicus		Common Bush-Tanager		University of Kansas, Natural History Museum		Chlorospingus
BARG	KBAR238-06	MACN-Or-ct 713	MDE 112	KUNHM 96862	694[0n]	2	0	Yes	FJ027362			23-Oct-2005	Chlorospingus ophthalmicus		Common Bush-Tanager		Museo Argentino de Ciencias Naturales		Chlorospingus
BARG	KAARG291-07	MACN-Or-ct 2388		MACN-Or 70477	694[0n]	2	0	Yes	FJ027371			02-Jun-2007	Chlorostilbon aureoventris		Glittering-bellied Emerald		Museo Argentino de Ciencias Naturales		Chlorostilbon
BARG	KAARG561-07	MACN-Or-ct 3174		MACN-Or 70879	678[0n]	2	0	Yes	FJ027370			21-Jul-2007	Chlorostilbon aureoventris		Glittering-bellied Emerald		Museo Argentino de Ciencias Naturales	3.0 g	Chlorostilbon
BARG	KAARG539-07	MACN-Or-ct 3144		MACN-Or 70849	685[0n]	2	0	Yes	FJ027369			18-Jul-2007	Chlorostilbon aureoventris		Glittering-bellied Emerald		Museo Argentino de Ciencias Naturales	3.3 g	Chlorostilbon
BARG	KBARG420-07	MACN-Or-ct 2976		MACN-Or 70787	694[0n]	2	0	Yes	FJ027368			19-Dec-2006	Chlorostilbon aureoventris		Glittering-bellied Emerald		Museo Argentino de Ciencias Naturales		Chlorostilbon
BARG	KBAR934-06	MACN-Or-ct 1714	MB 162	MACN-Or 69918	694[0n]	2	0	Yes	FJ027367			31-May-2006	Chlorostilbon aureoventris		Glittering-bellied Emerald		Museo Argentino de Ciencias Naturales		Chlorostilbon
BARG	KBAR788-06	MACN-Or-ct 1449		MACN-Or 69322	694[0n]	2	0	Yes	FJ027366			28-Apr-2006	Chlorostilbon aureoventris		Glittering-bellied Emerald		Museo Argentino de Ciencias Naturales		Chlorostilbon
BARG	KBAR465-06	MACN-Or-ct 1287	KGM 1119	MACN-Or 69063	694[0n]	2	0	Yes	FJ027380			12-Nov-2005	Cinclodes atacamensis		White-winged Cinclodes		Museo Argentino de Ciencias Naturales		Cinclodes
BARG	KBAR461-06	MACN-Or-ct 1271	KGM 1152	MACN-Or 69032	694[0n]	2	0	Yes	FJ027379			15-Nov-2005	Cinclodes atacamensis		White-winged Cinclodes		Museo Argentino de Ciencias Naturales		Cinclodes
BARG	KBAR470-06	MACN-Or-ct 1304	KGM 1100	MACN-Or 69573	676[0n]	2	0	Yes	FJ027378			07-Nov-2005	Cinclodes atacamensis		White-winged Cinclodes		Museo Argentino de Ciencias Naturales		Cinclodes
BARG	KAARG190-07	MACN-Or-ct 2158		MACN-Or 70247	694[1n]	2	0	Yes	FJ027388			15-May-2007	Cinclodes fuscus		Bar-winged Cinclodes		Museo Argentino de Ciencias Naturales		Cinclodes
BARG	KAARG338-07	MACN-Or-ct 3020		MACN-Or 70806	694[0n]	2	0	Yes	FJ027387			24-Jan-2007	Cinclodes fuscus		Bar-winged Cinclodes		Museo Argentino de Ciencias Naturales		Cinclodes
BARG	KAARG214-07	MACN-Or-ct 2186		MACN-Or 70275	694[0n]	2	0	Yes	FJ027386			15-Jun-2007	Cinclodes fuscus		Bar-winged Cinclodes		Museo Argentino de Ciencias Naturales		Cinclodes
BARG	KBARG236-07	MACN-Or-ct 2649	MDE 284		694[0n]	2	0	Yes	FJ027385			04-Nov-2006	Cinclodes fuscus		Bar-winged Cinclodes		University of Kansas, Natural History Museum		Cinclodes
BARG	KBARG211-07	MACN-Or-ct 2594		MACN-Or 70602	694[1n]	2	0	Yes	FJ027384			31-Oct-2006	Cinclodes fuscus		Bar-winged Cinclodes		Museo Argentino de Ciencias Naturales		Cinclodes
BARG	KBAR045-06	MACN-Or-ct 1076	KSB 654	MACN-Or 69150	694[0n]	2	0	Yes	FJ027383			07-Nov-2005	Cinclodes fuscus		Bar-winged Cinclodes		Museo Argentino de Ciencias Naturales		Cinclodes
BARG	KBAR047-06	MACN-Or-ct 843	MBR 6922	KUNHM 96887	694[0n]	2	0	Yes	FJ027382			05-Nov-2005	Cinclodes fuscus		Bar-winged Cinclodes		University of Kansas, Natural History Museum		Cinclodes
BARG	KBAR046-06	MACN-Or-ct 836	MDE 184	MACN-Or 69091	694[0n]	2	0	Yes	FJ027381			05-Nov-2005	Cinclodes fuscus		Bar-winged Cinclodes		Museo Argentino de Ciencias Naturales		Cinclodes
BARG	KAARG350-07	MACN-Or-ct 3036	SCT 1321		694[0n]	2	0	Yes	FJ027392			27-Jan-2007	Cinclodes patagonicus		Dark-bellied Cinclodes		Louisiana Museum of Natural History		Cinclodes
BARG	KAARG349-07	MACN-Or-ct 3035		MACN-Or 70814	694[0n]	2	0	Yes	FJ027391			27-Jan-2007	Cinclodes patagonicus		Dark-bellied Cinclodes		Museo Argentino de Ciencias Naturales		Cinclodes
BARG	KBARG237-07	MACN-Or-ct 2681		MACN-Or 70646	694[0n]	2	0	Yes	FJ027390			08-Nov-2006	Cinclodes patagonicus		Dark-bellied Cinclodes		Museo Argentino de Ciencias Naturales		Cinclodes
BARG	KBARG198-07	MACN-Or-ct 2675	MDE 292		694[0n]	2	0	Yes	FJ027389			08-Nov-2006	Cinclodes patagonicus		Dark-bellied Cinclodes		University of Kansas, Natural History Museum		Cinclodes
BARG	KBARG343-07	MACN-Or-ct 2928		MACN-Or 70771	694[0n]	2	0	Yes	FJ027398			13-Dec-2006	Cnemotriccus fuscatus		Fuscous Flycatcher		Museo Argentino de Ciencias Naturales		Cnemotriccus
BARG	KAARG404-07	MACN-Or-cp 20		MACN-Or 67990	694[0n]	2	0	Yes	FJ027399			29-Oct-1998	Coccyzus cinereus		Ash-colored Cuckoo		Museo Argentino de Ciencias Naturales		Coccyzus
BARG	KAARG280-07	MACN-Or-ct 2371		MACN-Or 70460	694[4n]	2	0	Yes	FJ027401			24-Apr-2007	Coccyzus melacoryphus		Dark-billed Cuckoo		Museo Argentino de Ciencias Naturales	Suspected female	Coccyzus
BARG	KBARG144-07	MACN-Or-ct 1861		MACN-Or 70061	694[0n]	2	0	Yes	FJ027400			26-Oct-2006	Coccyzus melacoryphus		Dark-billed Cuckoo		Museo Argentino de Ciencias Naturales		Coccyzus
BARG	KBARG152-07	MACN-Or-ct 1863		MACN-Or 70063	683[1n]	2	0	Yes	FJ027402			26-Oct-2006	Coccyzus melacoryphus		Dark-billed Cuckoo		Museo Argentino de Ciencias Naturales		Coccyzus
BARG	KBARG055-07	MACN-Or-ct 379		MACN-Or 69043	694[2n]	2	0	Yes	FJ027421			07-Feb-2006	Columba livia		Rock Pigeon		Museo Argentino de Ciencias Naturales		Columba
BARG	KAARG057-07	MACN-Or-ct 1484		MACN-Or 69726	694[1n]	2	0	Yes	FJ027428			29-Apr-2006	Columbina picui		Picui Ground-Dove		Museo Argentino de Ciencias Naturales		Columbina
BARG	KAARG627-07	MACN-Or-ct 3277		MACN-Or 70982	694[0n]	2	0	Yes	FJ027427			02-Aug-2007	Columbina picui		Picui Ground-Dove		Museo Argentino de Ciencias Naturales	45.5 g	Columbina
BARG	KAARG078-07	MACN-Or-ct 1897		MACN-Or 70096	688[2n]	2	0	Yes	FJ027426			01-Feb-2007	Columbina picui		Picui Ground-Dove		Museo Argentino de Ciencias Naturales		Columbina
BARG	KBAR789-06	MACN-Or-ct 1451		MACN-Or 71865	694[0n]	2	0	Yes	FJ027425			28-Apr-2006	Columbina picui		Picui Ground-Dove		Museo Argentino de Ciencias Naturales		Columbina
BARG	KBAR769-06	MACN-Or-ct 1392		MACN-Or 69638	694[0n]	2	0	Yes	FJ027424			26-Apr-2006	Columbina picui		Picui Ground-Dove		Museo Argentino de Ciencias Naturales		Columbina
BARG	KBAR598-06	MACN-Or-ct 008		MACN-Or 68461	694[0n]	2	0	Yes	FJ027423			07-Nov-2003	Columbina picui		Picui Ground-Dove		Museo Argentino de Ciencias Naturales		Columbina
BARG	KBAR018-06	MACN-Or-ct 810	MDE 168	KUNHM 97229	694[0n]	2	0	Yes	FJ027422			03-Nov-2005	Columbina picui		Picui Ground-Dove		University of Kansas, Natural History Museum		Columbina
BARG	KAARG361-07	MACN-Or-ct 3071		MACN-Or 70844	694[0n]	2	0	Yes	FJ027432			15-Feb-2007	Columbina talpacoti		Ruddy Ground-Dove		Museo Argentino de Ciencias Naturales		Columbina
BARG	KBAR583-06	MACN-Or-ct 1543		MACN-Or 69778	694[0n]	2	0	Yes	FJ027431			01-May-2006	Columbina talpacoti		Ruddy Ground-Dove		Museo Argentino de Ciencias Naturales		Columbina
BARG	KBAR582-06	MACN-Or-ct 1542		MACN-Or 69777	694[0n]	2	0	Yes	FJ027430			01-May-2006	Columbina talpacoti		Ruddy Ground-Dove		Museo Argentino de Ciencias Naturales		Columbina
BARG	KBAR581-06	MACN-Or-ct 1541		MACN-Or 69776	694[0n]	2	0	Yes	FJ027429			01-May-2006	Columbina talpacoti		Ruddy Ground-Dove		Museo Argentino de Ciencias Naturales		Columbina
BARG	KBARG162-07	MACN-Or-ct 1950	GSC 99	MACN-Or 69291	694[1n]	2	0	Yes	FJ027433			20-Oct-2006	Conopophaga lineata		Rufous Gnateater		Museo Argentino de Ciencias Naturales		Conopophaga
BARG	KAARG283-07	MACN-Or-ct 2374		MACN-Or 70463	694[0n]	2	0	Yes	FJ027436			10-May-2007	Coragyps atratus		Black Vulture		Museo Argentino de Ciencias Naturales		Coragyps
BARG	KBAR793-06	MACN-Or-ct 1463		MACN-Or 69705	694[0n]	2	0	Yes	FJ027435			28-Apr-2006	Coragyps atratus		Black Vulture		Museo Argentino de Ciencias Naturales		Coragyps
BARG	KAARG096-07	MACN-Or-ct 1919		MACN-Or 70118	694[1n]	2	0	Yes	FJ027446			01-Jan-2006	Coryphospingus cucullatus		Red-crested Finch		Museo Argentino de Ciencias Naturales		Coryphospingus
BARG	KAARG600-07	MACN-Or-ct 3228		MACN-Or 70933	678[0n]	2	0	Yes	FJ027445			28-Jul-2007	Coryphospingus cucullatus		Red-crested Finch		Museo Argentino de Ciencias Naturales	13.8 g	Coryphospingus
BARG	KBARG385-07	MACN-Or-ct 2949		MACN-Or 69234	694[0n]	2	0	Yes	FJ027444			14-Dec-2006	Coryphospingus cucullatus		Red-crested Finch		Museo Argentino de Ciencias Naturales		Coryphospingus
BARG	KBARG377-07	MACN-Or-ct 2933		MACN-Or 70775	694[0n]	2	0	Yes	FJ027443			13-Dec-2006	Coryphospingus cucullatus		Red-crested Finch		Museo Argentino de Ciencias Naturales		Coryphospingus
BARG	KAARG033-07	MACN-Or-ct 294		MACN-Or 68929	647[0n]	2	0	Yes	FJ027447			23-Jun-2005	Coryphospingus cucullatus		Red-crested Finch		Museo Argentino de Ciencias Naturales		Coryphospingus
BARG	KBAR539-06	MACN-Or-ct 1478		MACN-Or 69720	694[0n]	2	0	Yes	FJ027442			29-Apr-2006	Coryphospingus cucullatus		Red-crested Finch		Museo Argentino de Ciencias Naturales		Coryphospingus
BARG	KBAR528-06	MACN-Or-ct 1464		MACN-Or 69706	694[0n]	2	0	Yes	FJ027441			28-Apr-2006	Coryphospingus cucullatus		Red-crested Finch		Museo Argentino de Ciencias Naturales		Coryphospingus
BARG	KBAR526-06	MACN-Or-ct 1457		MACN-Or 69698	694[0n]	2	0	Yes	FJ027440			28-Apr-2006	Coryphospingus cucullatus		Red-crested Finch		Museo Argentino de Ciencias Naturales		Coryphospingus
BARG	KBARG394-07	MACN-Or-ct 2937		MACN-Or 69276	694[0n]	2	0	Yes	FJ027450			13-Dec-2006	Corythopis delalandi		Southern Antpipit		Museo Argentino de Ciencias Naturales		Corythopis
BARG	KBARG380-07	MACN-Or-ct 2965		MACN-Or 69225	694[0n]	2	0	Yes	FJ027449			16-Dec-2006	Corythopis delalandi		Southern Antpipit		Museo Argentino de Ciencias Naturales		Corythopis
BARG	KBARG123-07	MACN-Or-ct 1981	GSC 130	MACN-Or 69292	694[1n]	2	0	Yes	FJ027448			20-Oct-2006	Corythopis delalandi		Southern Antpipit		Museo Argentino de Ciencias Naturales		Corythopis
BARG	KAARG461-07	MACN-Or-cp 77		MACN-Or 65258	656[0n]	2	0	Yes	FJ027462			05-Oct-1995	Crypturellus tataupa		Tataupa Tinamou		Museo Argentino de Ciencias Naturales		Crypturellus
BARG	KAARG138-07	MACN-Or-ct 2094		MACN-Or 70184	694[0n]	2	0	Yes	FJ027473			28-Dec-2006	Cyanocompsa brissonii		Ultramarine Grosbeak		Museo Argentino de Ciencias Naturales		Cyanocompsa
BARG	KBARG090-07	MACN-Or-ct 1706	MB 154	MACN-Or 69910	694[0n]	2	0	Yes	FJ027472			30-May-2006	Cyanocompsa brissonii		Ultramarine Grosbeak		Museo Argentino de Ciencias Naturales		Cyanocompsa
BARG	KBARG027-07	MACN-Or-ct 1384		MACN-Or 69359	694[0n]	2	0	Yes	FJ027471			26-Apr-2006	Cyanocompsa brissonii		Ultramarine Grosbeak		Museo Argentino de Ciencias Naturales		Cyanocompsa
BARG	KBAR792-06	MACN-Or-ct 1461		MACN-Or 69703	694[0n]	2	0	Yes	FJ027470			28-Apr-2006	Cyanocompsa brissonii		Ultramarine Grosbeak		Museo Argentino de Ciencias Naturales		Cyanocompsa
BARG	KBAR766-06	MACN-Or-ct 1386		MACN-Or 69635	694[0n]	2	0	Yes	FJ027469			26-Apr-2006	Cyanocompsa brissonii		Ultramarine Grosbeak		Museo Argentino de Ciencias Naturales		Cyanocompsa
BARG	KBAR334-06	MACN-Or-ct 902	MDE 217	KUNHM 96928	694[0n]	2	0	Yes	FJ027468			12-Nov-2005	Cyanocompsa brissonii		Ultramarine Grosbeak		University of Kansas, Natural History Museum		Cyanocompsa
BARG	KBAR241-06	MACN-Or-ct 1142	ASB 035	MACN-Or 69202	694[0n]	2	0	Yes	FJ027467			12-Nov-2005	Cyanocompsa brissonii		Ultramarine Grosbeak		Museo Argentino de Ciencias Naturales		Cyanocompsa
BARG	KBAR242-06	MACN-Or-ct 1150	ASB 036	MACN-Or 69203	694[2n]	2	0	Yes	FJ027466			13-Nov-2005	Cyanocompsa brissonii		Ultramarine Grosbeak		Museo Argentino de Ciencias Naturales		Cyanocompsa
BARG	KAARG590-07	MACN-Or-ct 3215		MACN-Or 70920	673[0n]	2	0	Yes	FJ027478			27-Jul-2007	Cyanocorax chrysops		Plush-crested Jay		Museo Argentino de Ciencias Naturales	143.0 g	Cyanocorax
BARG	KBAR797-06	MACN-Or-ct 1486		MACN-Or 69728	694[0n]	2	0	Yes	FJ027477			29-Apr-2006	Cyanocorax chrysops		Plush-crested Jay		Museo Argentino de Ciencias Naturales		Cyanocorax
BARG	KBAR781-06	MACN-Or-ct 1430		MACN-Or 69674	694[0n]	2	0	Yes	FJ027476			27-Apr-2006	Cyanocorax chrysops		Plush-crested Jay		Museo Argentino de Ciencias Naturales		Cyanocorax
BARG	KBAR771-06	MACN-Or-ct 1395		MACN-Or 69641	694[0n]	2	0	Yes	FJ027475			26-Apr-2006	Cyanocorax chrysops		Plush-crested Jay		Museo Argentino de Ciencias Naturales		Cyanocorax
BARG	KBAR203-06	MACN-Or-ct 1137	KSB 681		694[0n]	2	0	Yes	FJ027474			12-Nov-2005	Cyanocorax chrysops		Plush-crested Jay		Cornell University, Museum of Vertebrates		Cyanocorax
BARG	KBARG094-07	MACN-Or-ct 1814		MACN-Or 70016	694[0n]	2	0	Yes	FJ027480			11-Oct-2006	Cyanocorax cyanomelas		Purplish Jay		Museo Argentino de Ciencias Naturales		Cyanocorax
BARG	KBAR901-06	MACN-Or-ct 1674	MB 122	MACN-Or 69880	694[0n]	2	0	Yes	FJ027479			22-May-2006	Cyanocorax cyanomelas		Purplish Jay		Museo Argentino de Ciencias Naturales		Cyanocorax
BARG	KBARG207-07	MACN-Or-ct 2707		MACN-Or 70657	694[0n]	2	0	Yes	FJ027483			11-Nov-2006	Cyanoliseus patagonus		Burrowing Parrot		Museo Argentino de Ciencias Naturales		Cyanoliseus
BARG	KBARG191-07	MACN-Or-ct 2700		MACN-Or 70655	694[0n]	2	0	Yes	FJ027482			10-Nov-2006	Cyanoliseus patagonus		Burrowing Parrot		Museo Argentino de Ciencias Naturales		Cyanoliseus
BARG	KBAR631-06	MACN-Or-ct 551	PRS 2850		694[0n]	2	0	Yes	FJ027481			20-Jan-2005	Cyanoliseus patagonus		Burrowing Parrot		American Museum of Natural History		Cyanoliseus
BARG	KBAR204-06	MACN-Or-ct 1118	KSB 675	MACN-Or 69196	694[0n]	2	0	Yes	FJ027487			11-Nov-2005	Cyclarhis gujanensis		Rufous-browed Peppershrike		Museo Argentino de Ciencias Naturales		Cyclarhis
BARG	KBAR796-06	MACN-Or-ct 1482		MACN-Or 69724	645[0n]	2	0	Yes	FJ027486			29-Apr-2006	Cyclarhis gujanensis		Rufous-browed Peppershrike		Museo Argentino de Ciencias Naturales		Cyclarhis
BARG	KBAR784-06	MACN-Or-ct 1441		MACN-Or 69685	645[0n]	2	0	Yes	FJ027485			28-Apr-2006	Cyclarhis gujanensis		Rufous-browed Peppershrike		Museo Argentino de Ciencias Naturales		Cyclarhis
BARG	KBAR765-06	MACN-Or-ct 1383		MACN-Or 69355	645[0n]	2	0	Yes	FJ027484			26-Apr-2006	Cyclarhis gujanensis		Rufous-browed Peppershrike		Museo Argentino de Ciencias Naturales		Cyclarhis
BARG	KBARG409-07	MACN-Or-ct 2958		MACN-Or 69255	694[0n]	2	0	Yes	FJ027492			15-Dec-2006	Dendrocincla turdina	I	Thrush-like Woodcreeper		Museo Argentino de Ciencias Naturales		Dendrocincla
BARG	KBARG402-07	MACN-Or-ct 2939		MACN-Or 70777	694[0n]	2	0	Yes	FJ027491			14-Dec-2006	Dendrocincla turdina		Thrush-like Woodcreeper		Museo Argentino de Ciencias Naturales		Dendrocincla
BARG	KBARG281-07	MACN-Or-ct 2897		MACN-Or 70753	694[0n]	2	0	Yes	FJ027490			11-Dec-2006	Dendrocincla turdina		Thrush-like Woodcreeper		Museo Argentino de Ciencias Naturales		Dendrocincla
BARG	KAARG615-07	MACN-Or-ct 3249		MACN-Or 70954	674[0n]	2	0	Yes	FJ027494			01-Aug-2007	Dendrocolaptes platyrostris		Planalto Woodcreeper		Museo Argentino de Ciencias Naturales	49.1 g	Dendrocolaptes
BARG	KAARG543-07	MACN-Or-ct 3149		MACN-Or 70854	676[0n]	2	0	Yes	FJ027493			18-Jul-2007	Dendrocolaptes platyrostris		Planalto Woodcreeper		Museo Argentino de Ciencias Naturales	53.3 g	Dendrocolaptes
BARG	KBARG282-07	MACN-Or-ct 2883		MACN-Or 70745	691[0n]	2	0	Yes	FJ027518			10-Dec-2006	Drymophila rubricollis		Bertoni's Antbird		Museo Argentino de Ciencias Naturales		Drymophila
BARG	KBAR407-06	MACN-Or-ct 481		MACN-Or 62214	694[0n]	2	0	Yes	FJ027519			25-Oct-1991	Dryocopus lineatus		Lineated Woodpecker		Museo Argentino de Ciencias Naturales		Dryocopus
BARG	KBARG355-07	MACN-Or-ct 2861		MACN-Or 69264	694[0n]	2	0	Yes	FJ027522			09-Dec-2006	Dysithamnus mentalis		Plain Antvireo		Museo Argentino de Ciencias Naturales		Dysithamnus
BARG	KBARG353-07	MACN-Or-ct 2894		MACN-Or 69265	694[0n]	2	0	Yes	FJ027521			11-Dec-2006	Dysithamnus mentalis		Plain Antvireo		Museo Argentino de Ciencias Naturales		Dysithamnus
BARG	KBARG331-07	MACN-Or-ct 2857		MACN-Or 69248	694[0n]	2	0	Yes	FJ027520			09-Dec-2006	Dysithamnus mentalis		Plain Antvireo		Museo Argentino de Ciencias Naturales		Dysithamnus
BARG	KBARG210-07	MACN-Or-ct 2771		MACN-Or 70691	694[0n]	2	0	Yes	FJ027566			16-Nov-2006	Eudromia elegans		Elegant Crested Tinamou		Museo Argentino de Ciencias Naturales		Eudromia
BARG	KBARG263-07	MACN-Or-ct 2745		MACN-Or 70677	694[1n]	2	0	Yes	FJ027567			15-Nov-2006	Eudromia elegans		Elegant Crested Tinamou		Museo Argentino de Ciencias Naturales		Eudromia
BARG	KBAR430-06	MACN-Or-ct 571	PRS 2871	MACN-Or 68729	694[3n]	2	0	Yes	FJ027565			22-Jan-2004	Eudromia elegans		Elegant Crested Tinamou		Museo Argentino de Ciencias Naturales		Eudromia
BARG	KAARG597-07	MACN-Or-ct 3225		MACN-Or 70930	681[0n]	2	0	Yes	FJ027570			28-Jul-2007	Euphonia chlorotica		Purple-throated Euphonia		Museo Argentino de Ciencias Naturales	15.1 g	Euphonia
BARG	KBARG312-07	MACN-Or-ct 2903		MACN-Or 69279	694[0n]	2	0	Yes	FJ027569			11-Dec-2006	Euphonia chlorotica		Purple-throated Euphonia		Museo Argentino de Ciencias Naturales		Euphonia
BARG	KBAR819-06	MACN-Or-ct 1564	MB 12	MACN-Or 69795	694[0n]	2	0	Yes	FJ027568			02-May-2006	Euphonia chlorotica		Purple-throated Euphonia		Museo Argentino de Ciencias Naturales		Euphonia
BARG	KBAR247-06	MACN-Or-ct 1149	MJA 208	MACN-Or 69197	694[0n]	2	0	Yes	FJ027572			13-Nov-2005	Euphonia cyanocephala		Golden-rumped Euphonia		Museo Argentino de Ciencias Naturales		Euphonia
BARG	KBAR248-06	MACN-Or-ct 913	MDE 223		694[0n]	2	0	Yes	FJ027571			13-Nov-2005	Euphonia cyanocephala		Golden-rumped Euphonia		Cornell University, Museum of Vertebrates		Euphonia
BARG	KBARG298-07	MACN-Or-ct 2867		MACN-Or 69277	694[0n]	2	0	Yes	FJ027574			09-Dec-2006	Euphonia pectoralis		Chestnut-bellied Euphonia		Museo Argentino de Ciencias Naturales		Euphonia
BARG	KBARG291-07	MACN-Or-ct 2866		MACN-Or 69278	694[0n]	2	0	Yes	FJ027573			09-Dec-2006	Euphonia pectoralis		Chestnut-bellied Euphonia		Museo Argentino de Ciencias Naturales		Euphonia
BARG	KAARG083-07	MACN-Or-ct 1904		MACN-Or 70103	694[0n]	2	0	Yes	FJ027575			22-Nov-2006	Euscarthmus meloryphus		Tawny-crowned Pygmy-Tyrant		Museo Argentino de Ciencias Naturales		Euscarthmus
BARG	KAARG274-07	MACN-Or-ct 2363		MACN-Or 70452	694[0n]	2	0	Yes	FJ027578			28-Feb-2007	Falco femoralis	I	Aplomado Falcon		Museo Argentino de Ciencias Naturales		Falco
BARG	KAARG275-07	MACN-Or-ct 2364		MACN-Or 70453	694[0n]	2	0	Yes	FJ027579			01-Mar-2007	Falco femoralis		Aplomado Falcon		Museo Argentino de Ciencias Naturales		Falco
BARG	KBARG098-07	MACN-Or-ct 1886		MACN-Or 70085	694[0n]	2	0	Yes	FJ027577			12-Jun-2006	Falco femoralis		Aplomado Falcon		Museo Argentino de Ciencias Naturales		Falco
BARG	KBAR899-06	MACN-Or-ct 1670	MB 118	MACN-Or 69877	694[0n]	2	0	Yes	FJ027576			21-May-2006	Falco femoralis		Aplomado Falcon		Museo Argentino de Ciencias Naturales		Falco
BARG	KAARG011-07	MACN-Or-ct 156		MACN-Or 69395	694[0n]	2	0	Yes	FJ027580			01-Dec-2004	Falco peregrinus		Peregrine Falcon		Museo Argentino de Ciencias Naturales		Falco
BARG	KBARG246-07	MACN-Or-ct 2722	MDE 309		694[0n]	2	0	Yes	FJ027583			12-Nov-2006	Falco sparverius		American Kestrel		University of Kansas, Natural History Museum		Falco
BARG	KBAR815-06	MACN-Or-ct 1559	MB 07	MACN-Or 69791	694[0n]	2	0	Yes	FJ027582			02-May-2006	Falco sparverius		American Kestrel		Museo Argentino de Ciencias Naturales		Falco
BARG	KBAR685-06	MACN-Or-ct 1040	FBG 011	MACN-Or 69117	694[0n]	2	0	Yes	FJ027581			05-Nov-2005	Falco sparverius		American Kestrel		Museo Argentino de Ciencias Naturales		Falco
BARG	KBAR776-06	MACN-Or-ct 1421		MACN-Or 69665	694[0n]	2	0	Yes	FJ027613			27-Apr-2006	Gampsonyx swainsonii		Pearl Kite		Museo Argentino de Ciencias Naturales		Gampsonyx
BARG	KAARG549-07	MACN-Or-ct 3159		MACN-Or 70864	641[0n]	2	0	Yes	FJ027625			19-Jul-2007	Geothlypis aequinoctialis	A	Masked Yellowthroat		Museo Argentino de Ciencias Naturales	12.1 g	Geothlypis
BARG	KAARG594-07	MACN-Or-ct 3220		MACN-Or 70925	655[1n]	2	0	Yes	FJ027624			27-Jul-2007	Geothlypis aequinoctialis		Masked Yellowthroat		Museo Argentino de Ciencias Naturales	11.8 g	Geothlypis
BARG	KBAR577-06	MACN-Or-ct 1533		MACN-Or 69769	694[0n]	2	0	Yes	FJ027623			01-May-2006	Geothlypis aequinoctialis		Masked Yellowthroat		Museo Argentino de Ciencias Naturales		Geothlypis
BARG	KBAR486-06	MACN-Or-ct 1374		MACN-Or 69356	694[0n]	2	0	Yes	FJ027622			26-Apr-2006	Geothlypis aequinoctialis		Masked Yellowthroat		Museo Argentino de Ciencias Naturales		Geothlypis
BARG	KAARG103-07	MACN-Or-ct 1927		MACN-Or 70126	694[0n]	2	0	Yes	FJ027626			01-May-2006	Geranoaetus melanoleucus		Black-chested Buzzard-Eagle		Museo Argentino de Ciencias Naturales		Geranoaetus
BARG	KAARG398-07	MACN-Or-cp 14		MACN-Or 66604	694[0n]	2	0	Yes	FJ027627			20-Jul-1996	Geranospiza caerulescens		Crane Hawk		Museo Argentino de Ciencias Naturales		Geranospiza
BARG	KAARG576-07	MACN-Or-ct 3193		MACN-Or 70898	671[1n]	2	0	Yes	FJ027630			23-Jul-2007	Glaucidium brasilianum		Ferruginous Pygmy-Owl		Museo Argentino de Ciencias Naturales	60.0 g	Glaucidium
BARG	KBARG002-07	MACN-Or-ct 1335		MACN-Or 69602	694[0n]	2	0	Yes	FJ027628			14-Sep-2006	Glaucidium brasilianum		Ferruginous Pygmy-Owl		Museo Argentino de Ciencias Naturales		Glaucidium
BARG	KBAR627-06	MACN-Or-ct 382		MACN-Or 69056	694[0n]	2	0	Yes	FJ027629			11-Feb-2006	Glaucidium brasilianum		Ferruginous Pygmy-Owl		Museo Argentino de Ciencias Naturales		Glaucidium
BARG	KBARG199-07	MACN-Or-ct 2701	MBR 7077		694[0n]	2	0	Yes	FJ027632			11-Nov-2006	Glaucidium nanum		Austral Pygmy-Owl		University of Kansas, Natural History Museum		Glaucidium
BARG	KBARG188-07	MACN-Or-ct 2620		MACN-Or 70615	694[0n]	2	0	Yes	FJ027631			02-Nov-2006	Glaucidium nanum		Austral Pygmy-Owl		Museo Argentino de Ciencias Naturales		Glaucidium
BARG	KAARG070-07	MACN-Or-ct 1887		MACN-Or 70086	694[0n]	2	0	Yes	FJ027633			04-Jun-2006	Gnorimopsar chopi		Chopi Blackbird		Museo Argentino de Ciencias Naturales		Gnorimopsar
BARG	KBAR607-06	MACN-Or-ct 040		MACN-Or 68379	694[0n]	2	0	Yes	FJ027636			12-Nov-2003	Gubernatrix cristata		Yellow Cardinal		Museo Argentino de Ciencias Naturales		Gubernatrix
BARG	KBARG374-07	MACN-Or-ct 2977		MACN-Or 70788	694[0n]	2	0	Yes	FJ027639			19-Dec-2006	Habia rubica		Red-crowned Ant-Tanager		Museo Argentino de Ciencias Naturales		Habia
BARG	KBARG329-07	MACN-Or-ct 2890		MACN-Or 70749	694[0n]	2	0	Yes	FJ027638			11-Dec-2006	Habia rubica		Red-crowned Ant-Tanager		Museo Argentino de Ciencias Naturales		Habia
BARG	KBARG396-07	MACN-Or-ct 2969		MACN-Or 69236	694[0n]	2	0	Yes	FJ027642			17-Dec-2006	Haplospiza unicolor		Uniform Finch		Museo Argentino de Ciencias Naturales		Haplospiza
BARG	KBARG186-07	MACN-Or-ct 2039	GSC 188	MACN-Or 69284	694[1n]	2	0	Yes	FJ027643			20-Oct-2006	Hemitriccus diops		Drab-breasted Bamboo-Tyrant		Museo Argentino de Ciencias Naturales		Hemitriccus
BARG	KAARG544-07	MACN-Or-ct 3150		MACN-Or 70855	681[0n]	2	0	Yes	FJ027647			19-Jul-2007	Hemitriccus margaritaceiventer		Pearly-vented Tody-Tyrant		Museo Argentino de Ciencias Naturales	8.3 g	Hemitriccus
BARG	KAARG566-07	MACN-Or-ct 3181		MACN-Or 70886	646[4n]	2	0	Yes	FJ027648			21-Jul-2007	Hemitriccus margaritaceiventer		Pearly-vented Tody-Tyrant		Museo Argentino de Ciencias Naturales	7.7 g	Hemitriccus
BARG	KBAR547-06	MACN-Or-ct 1493		MACN-Or 69735	694[0n]	2	0	Yes	FJ027646			29-Apr-2006	Hemitriccus margaritaceiventer		Pearly-vented Tody-Tyrant		Museo Argentino de Ciencias Naturales	Hemitriccus (Todirostrum) margaritaceiventer	Hemitriccus
BARG	KBAR499-06	MACN-Or-ct 1405		MACN-Or 69649	694[0n]	2	0	Yes	FJ027645			27-Apr-2006	Hemitriccus margaritaceiventer		Pearly-vented Tody-Tyrant		Museo Argentino de Ciencias Naturales	Hemitriccus (Todirostrum) margaritaceiventer	Hemitriccus
BARG	KBAR479-06	MACN-Or-ct 1355		MACN-Or 69622	694[0n]	2	0	Yes	FJ027644			25-Apr-2006	Hemitriccus margaritaceiventer		Pearly-vented Tody-Tyrant		Museo Argentino de Ciencias Naturales	Hemitriccus (Todirostrum) margaritaceiventer	Hemitriccus
BARG	KBAR853-06	MACN-Or-ct 1612	MB 60	MACN-Or 69825	694[0n]	2	0	Yes	FJ027652			08-May-2006	Himantopus melanurus		White-backed Stilt		Museo Argentino de Ciencias Naturales		Himantopus
BARG	KBAR831-06	MACN-Or-ct 1580	MB 28	MACN-Or 69808	694[0n]	2	0	Yes	FJ027651			03-May-2006	Himantopus melanurus		White-backed Stilt		Museo Argentino de Ciencias Naturales		Himantopus
BARG	KBAR855-06	MACN-Or-ct 1616	MB 64	MACN-Or 69829	681[4n]	2	0	Yes	FJ027650			08-May-2006	Himantopus melanurus		White-backed Stilt		Museo Argentino de Ciencias Naturales		Himantopus
BARG	KAARG540-07	MACN-Or-ct 3145		MACN-Or 70850	694[0n]	2	0	Yes	FJ027666			18-Jul-2007	Hylocharis chrysura		Gilded Sapphire		Museo Argentino de Ciencias Naturales		Hylocharis
BARG	KAARG580-07	MACN-Or-ct 3198		MACN-Or 70903	689[0n]	2	0	Yes	FJ027664			23-Jul-2007	Hylocharis chrysura		Gilded Sapphire		Museo Argentino de Ciencias Naturales		Hylocharis
BARG	KBARG322-07	MACN-Or-ct 2870		MACN-Or 70739	694[0n]	2	0	Yes	FJ027662			09-Dec-2006	Hylocharis chrysura		Gilded Sapphire		Museo Argentino de Ciencias Naturales		Hylocharis
BARG	KBARG307-07	MACN-Or-ct 2854		MACN-Or 70734	694[0n]	2	0	Yes	FJ027661			08-Dec-2006	Hylocharis chrysura		Gilded Sapphire		Museo Argentino de Ciencias Naturales		Hylocharis
BARG	KBARG113-07	MACN-Or-ct 1874		MACN-Or 70073	644[1n]	2	0	Yes	FJ027665			01-Nov-2006	Hylocharis chrysura		Gilded Sapphire		Museo Argentino de Ciencias Naturales		Hylocharis
BARG	KBAR757-06	MACN-Or-ct 1361		MACN-Or 69343	694[0n]	2	0	Yes	FJ027663			26-Apr-2006	Hylocharis chrysura		Gilded Sapphire		Museo Argentino de Ciencias Naturales		Hylocharis
BARG	KAARG154-07	MACN-Or-ct 2120		MACN-Or 70209	694[0n]	2	0	Yes	FJ027680			09-May-2007	Icterus cayanensis		Epaulet Oriole		Museo Argentino de Ciencias Naturales		Icterus
BARG	KAARG152-07	MACN-Or-ct 2118		MACN-Or 70207	694[0n]	2	0	Yes	FJ027679			09-May-2007	Icterus cayanensis		Epaulet Oriole		Museo Argentino de Ciencias Naturales		Icterus
BARG	KAARG562-07	MACN-Or-ct 3175		MACN-Or 70880	694[3n]	2	0	Yes	FJ027677			21-Jul-2007	Icterus cayanensis	A	Epaulet Oriole		Museo Argentino de Ciencias Naturales	27.6 g	Icterus
BARG	KAARG558-07	MACN-Or-ct 3171		MACN-Or 70876	644[0n]	2	0	Yes	FJ027678			20-Jul-2007	Icterus cayanensis		Epaulet Oriole		Museo Argentino de Ciencias Naturales	25.4 g	Icterus
BARG	KBAR544-06	MACN-Or-ct 1489		MACN-Or 69731	694[0n]	2	0	Yes	FJ027676			29-Apr-2006	Icterus cayanensis		Epaulet Oriole		Museo Argentino de Ciencias Naturales		Icterus
BARG	KBAR542-06	MACN-Or-ct 1483		MACN-Or 69725	694[0n]	2	0	Yes	FJ027675			29-Apr-2006	Icterus cayanensis		Epaulet Oriole		Museo Argentino de Ciencias Naturales		Icterus
BARG	KBAR563-06	MACN-Or-ct 1516		MACN-Or 69756	694[1n]	2	0	Yes	FJ027674			30-Apr-2006	Icterus cayanensis		Epaulet Oriole		Museo Argentino de Ciencias Naturales		Icterus
BARG	KAARG265-07	MACN-Or-ct 2350		MACN-Or 70439	694[0n]	2	0	Yes	FJ027682			02-Feb-2007	Ictinia mississippiensis	I	Mississippi Kite		Museo Argentino de Ciencias Naturales		Ictinia
BARG	KAARG266-07	MACN-Or-ct 2351		MACN-Or 70440	680[0n]	2	0	Yes	FJ027681			03-Feb-2007	Ictinia mississippiensis		Mississippi Kite		Museo Argentino de Ciencias Naturales		Ictinia
BARG	KAARG126-07	MACN-Or-ct 2076		MACN-Or 70166	694[1n]	2	0	Yes	FJ027685			28-Nov-2006	Ictinia plumbea		Plumbeous Kite		Museo Argentino de Ciencias Naturales		Ictinia
BARG	KAARG127-07	MACN-Or-ct 2077		MACN-Or 70167	694[2n]	2	0	Yes	FJ027684			28-Nov-2006	Ictinia plumbea		Plumbeous Kite		Museo Argentino de Ciencias Naturales		Ictinia
BARG	KBARG068-07	MACN-Or-ct 1766		MACN-Or 69969	694[0n]	2	0	Yes	FJ027683			21-Sep-2006	Ictinia plumbea		Plumbeous Kite		Museo Argentino de Ciencias Naturales		Ictinia
BARG	KBAR902-06	MACN-Or-ct 1675	MB 123	MACN-Or 69881	694[0n]	2	0	Yes	FJ027688			22-May-2006	Jacana jacana		Wattled Jacana		Museo Argentino de Ciencias Naturales		Jacana
BARG	KBAR525-06	MACN-Or-ct 1455		MACN-Or 69696	694[0n]	2	0	Yes	FJ027687			28-Apr-2006	Jacana jacana		Wattled Jacana		Museo Argentino de Ciencias Naturales		Jacana
BARG	KBAR125-06	MACN-Or-ct 1126	KSB 677		694[0n]	2	0	Yes	FJ027712			11-Nov-2005	Lathrotriccus euleri		Euler's Flycatcher		Cornell University, Museum of Vertebrates		Lathrotriccus
BARG	KBAR127-06	MACN-Or-ct 905	MDE 219	KUNHM 96942	694[0n]	2	0	Yes	FJ027711			12-Nov-2005	Lathrotriccus euleri		Euler's Flycatcher		University of Kansas, Natural History Museum		Lathrotriccus
BARG	KBAR126-06	MACN-Or-ct 1138	PB 031	MACN-Or 69159	694[1n]	2	0	Yes	FJ027710			12-Nov-2005	Lathrotriccus euleri		Euler's Flycatcher		Museo Argentino de Ciencias Naturales		Lathrotriccus
BARG	KAARG626-07	MACN-Or-ct 3276		MACN-Or 70981	694[1n]	2	0	Yes	FJ027718			02-Aug-2007	Lepidocolaptes angustirostris		Narrow-billed Woodcreeper		Museo Argentino de Ciencias Naturales	27.0 g	Lepidocolaptes
BARG	KAARG151-07	MACN-Or-ct 2117		MACN-Or 70206	694[1n]	2	0	Yes	FJ027717			09-May-2007	Lepidocolaptes angustirostris		Narrow-billed Woodcreeper		Museo Argentino de Ciencias Naturales		Lepidocolaptes
BARG	KAARG169-07	MACN-Or-ct 2136		MACN-Or 70225	678[2n]	2	0	Yes	FJ027716			10-May-2007	Lepidocolaptes angustirostris		Narrow-billed Woodcreeper		Museo Argentino de Ciencias Naturales		Lepidocolaptes
BARG	KAARG575-07	MACN-Or-ct 3191		MACN-Or 70896	684[0n]	2	0	Yes	FJ027715			22-Jul-2007	Lepidocolaptes angustirostris		Narrow-billed Woodcreeper		Museo Argentino de Ciencias Naturales	27.8 g	Lepidocolaptes
BARG	KBAR894-06	MACN-Or-ct 1665	MB 113	MACN-Or 69872	694[0n]	2	0	Yes	FJ027719			19-May-2006	Lepidocolaptes angustirostris		Narrow-billed Woodcreeper		Museo Argentino de Ciencias Naturales		Lepidocolaptes
BARG	KBAR498-06	MACN-Or-ct 1404		MACN-Or 69648	694[1n]	2	0	Yes	FJ027714			27-Apr-2006	Lepidocolaptes angustirostris		Narrow-billed Woodcreeper		Museo Argentino de Ciencias Naturales		Lepidocolaptes
BARG	KBAR478-06	MACN-Or-ct 1351		MACN-Or 69618	694[1n]	2	0	Yes	FJ027713			25-Apr-2006	Lepidocolaptes angustirostris		Narrow-billed Woodcreeper		Museo Argentino de Ciencias Naturales		Lepidocolaptes
BARG	KAARG428-07	MACN-Or-cp 44		MACN-Or 67530	694[4n]	2	0	Yes	FJ027720			08-Feb-1997	Lepidocolaptes falcinellus		Scalloped Woodcreeper		Museo Argentino de Ciencias Naturales		Lepidocolaptes
BARG	KAARG377-07	MACN-Or-ct 2025	GSC 174	MACN-Or-pict 2025 (picture)	694[0n]	2	0	Yes	FJ027740			21-Oct-2006	Leptopogon amaurocephalus		Sepia-capped Flycatcher		Museo Argentino de Ciencias Naturales		Leptopogon
BARG	KAARG376-07	MACN-Or-ct 1979	GSC 128	MACN-Or-pict 1979 (picture)	694[0n]	2	0	Yes	FJ027739			20-Oct-2006	Leptopogon amaurocephalus		Sepia-capped Flycatcher		Museo Argentino de Ciencias Naturales		Leptopogon
BARG	KBARG417-07	MACN-Or-ct 2963		MACN-Or 69227	694[0n]	2	0	Yes	FJ027737			16-Dec-2006	Leptopogon amaurocephalus		Sepia-capped Flycatcher		Museo Argentino de Ciencias Naturales		Leptopogon
BARG	KBARG414-07	MACN-Or-ct 2943		MACN-Or 69226	694[0n]	2	0	Yes	FJ027736			14-Dec-2006	Leptopogon amaurocephalus		Sepia-capped Flycatcher		Museo Argentino de Ciencias Naturales		Leptopogon
BARG	KBARG386-07	MACN-Or-ct 2935		MACN-Or 69274	694[0n]	2	0	Yes	FJ027735			13-Dec-2006	Leptopogon amaurocephalus		Sepia-capped Flycatcher		Museo Argentino de Ciencias Naturales		Leptopogon
BARG	KBARG139-07	MACN-Or-ct 1983	GSC 132	MACN-Or 69282	694[2n]	2	0	Yes	FJ027738			20-Oct-2006	Leptopogon amaurocephalus		Sepia-capped Flycatcher		Museo Argentino de Ciencias Naturales		Leptopogon
BARG	KAARG353-07	MACN-Or-ct 3046		MACN-Or 70819	694[1n]	2	0	Yes	FJ027772				Manacus manacus		White-bearded Manakin		Museo Argentino de Ciencias Naturales		Manacus
BARG	KAARG313-07	MACN-Or-ct 2877		MACN-Or-pict 2877 (picture)	694[0n]	2	0	Yes	FJ027774			10-Dec-2006	Manacus manacus		White-bearded Manakin		Museo Argentino de Ciencias Naturales		Manacus
BARG	KAARG312-07	MACN-Or-ct 2876		MACN-Or-pict 2876 (picture)	694[0n]	2	0	Yes	FJ027773			10-Dec-2006	Manacus manacus		White-bearded Manakin		Museo Argentino de Ciencias Naturales		Manacus
BARG	KBARG395-07	MACN-Or-ct 3042		MACN-Or 69268	694[0n]	2	0	Yes	FJ027771			12-Jun-2006	Manacus manacus		White-bearded Manakin		Museo Argentino de Ciencias Naturales		Manacus
BARG	KBARG371-07	MACN-Or-ct 2863		MACN-Or 69267	694[0n]	2	0	Yes	FJ027770			09-Dec-2006	Manacus manacus		White-bearded Manakin		Museo Argentino de Ciencias Naturales		Manacus
BARG	KBARG354-07	MACN-Or-ct 2880		MACN-Or 69266	694[0n]	2	0	Yes	FJ027769			10-Dec-2006	Manacus manacus		White-bearded Manakin		Museo Argentino de Ciencias Naturales		Manacus
BARG	KAARG611-07	MACN-Or-ct 3244		MACN-Or 70949	669[0n]	2	0	Yes	FJ027784			31-Jul-2007	Megascops choliba		Tropical Screech-Owl		Museo Argentino de Ciencias Naturales	110.0 g	Megascops
BARG	KBARG411-07	MACN-Or-ct 3047		MACN-Or 70820	694[0n]	2	0	Yes	FJ027783			25-Jun-2006	Megascops choliba		Tropical Screech-Owl		Museo Argentino de Ciencias Naturales	Originally placed in the genus Otus	Megascops
BARG	KBARG130-07	MACN-Or-ct 3057		MACN-Or 70830	694[0n]	2	0	Yes	FJ027782			01-Jun-2006	Megascops choliba		Tropical Screech-Owl		Museo Argentino de Ciencias Naturales	Originally placed in the genus Otus	Megascops
BARG	KBAR900-06	MACN-Or-ct 1672	MB 120	MACN-Or 69304	694[0n]	2	0	Yes	FJ027785			22-May-2006	Megascops choliba		Tropical Screech-Owl		Museo Argentino de Ciencias Naturales	Megascops (Otus) choliba	Megascops
BARG	KBAR654-06	MACN-Or-ct 767	MBR 6890	KUNHM 96825	694[0n]	2	0	Yes	FJ027786			27-Oct-2005	Megascops hoyi		Hoy's Screech-Owl		University of Kansas, Natural History Museum	Megascops (Otus) hoyi	Megascops
BARG	KAARG107-07	MACN-Or-ct 1934		MACN-Or 70133	694[0n]	2	0	Yes	FJ027790			01-Mar-2006	Melanerpes cactorum		White-fronted Woodpecker		Museo Argentino de Ciencias Naturales		Melanerpes
BARG	KAARG596-07	MACN-Or-ct 3224		MACN-Or 70929	681[0n]	2	0	Yes	FJ027789			28-Jul-2007	Melanerpes cactorum		White-fronted Woodpecker		Museo Argentino de Ciencias Naturales	37.0 g	Melanerpes
BARG	KAARG108-07	MACN-Or-ct 1935		MACN-Or 70134	691[0n]	2	0	Yes	FJ027788			01-Mar-2006	Melanerpes cactorum		White-fronted Woodpecker		Museo Argentino de Ciencias Naturales		Melanerpes
BARG	KAARG552-07	MACN-Or-ct 3164		MACN-Or 70869	667[0n]	2	0	Yes	FJ027787			20-Jul-2007	Melanerpes cactorum		White-fronted Woodpecker		Museo Argentino de Ciencias Naturales	32.2 g	Melanerpes
BARG	KAARG170-07	MACN-Or-ct 2137		MACN-Or 70226	694[2n]	2	0	Yes	FJ027795			10-May-2007	Melanerpes candidus		White Woodpecker		Museo Argentino de Ciencias Naturales		Melanerpes
BARG	KAARG172-07	MACN-Or-ct 2139		MACN-Or 70228	666[0n]	2	0	Yes	FJ027794			10-May-2007	Melanerpes candidus		White Woodpecker		Museo Argentino de Ciencias Naturales		Melanerpes
BARG	KBAR936-06	MACN-Or-ct 1716	MB 164	MACN-Or 69920	694[0n]	2	0	Yes	FJ027793			01-Jun-2006	Melanerpes candidus		White Woodpecker		Museo Argentino de Ciencias Naturales		Melanerpes
BARG	KBAR935-06	MACN-Or-ct 1715	MB 163	MACN-Or 69919	694[0n]	2	0	Yes	FJ027792			01-Jun-2006	Melanerpes candidus		White Woodpecker		Museo Argentino de Ciencias Naturales		Melanerpes
BARG	KBAR884-06	MACN-Or-ct 1652	MB 100	MACN-Or 69861	694[0n]	2	0	Yes	FJ027791			16-May-2006	Melanerpes candidus		White Woodpecker		Museo Argentino de Ciencias Naturales		Melanerpes
BARG	KBAR864-06	MACN-Or-ct 1627	MB 75	MACN-Or 69838	674[0n]	4	0	Yes	FJ027808			10-May-2006	Milvago chimachima		Yellow-headed Caracara		Museo Argentino de Ciencias Naturales		Milvago
BARG	KBAR865-06	MACN-Or-ct 1628	MB 76	MACN-Or 69839	676[5n]	4	0	Yes	FJ027807			10-May-2006	Milvago chimachima		Yellow-headed Caracara		Museo Argentino de Ciencias Naturales		Milvago
BARG	KBAR821-06	MACN-Or-ct 1566	MB 14	MACN-Or 69797	674[2n]	3	0	Yes	FJ027806			03-May-2006	Milvago chimachima		Yellow-headed Caracara		Museo Argentino de Ciencias Naturales	Originally entered as "Milvago chimango"	Milvago
BARG	KBAR850-06	MACN-Or-ct 1607	MB 55	MACN-Or 69823	673[0n]	4	0	Yes	FJ027805			07-May-2006	Milvago chimachima		Yellow-headed Caracara		Museo Argentino de Ciencias Naturales		Milvago
BARG	KBAR315-06	MACN-Or-ct 817	MBR 6909	KUNHM 96876	694[0n]	2	0	Yes	FJ027811			04-Nov-2005	Mimus dorsalis		Brown-backed Mockingbird		University of Kansas, Natural History Museum		Mimus
BARG	KBAR187-06	MACN-Or-ct 1028	KSB 636		694[0n]	2	0	Yes	FJ027810			04-Nov-2005	Mimus dorsalis		Brown-backed Mockingbird		Cornell University, Museum of Vertebrates		Mimus
BARG	KBAR188-06	MACN-Or-ct 1082	ASB 025	MACN-Or 69190	694[2n]	2	0	Yes	FJ027809			08-Nov-2005	Mimus dorsalis		Brown-backed Mockingbird		Museo Argentino de Ciencias Naturales		Mimus
BARG	KBARG326-07	MACN-Or-ct 2807		MACN-Or 70708	694[0n]	2	0	Yes	FJ027816			18-Nov-2006	Mimus patagonicus		Patagonian Mockingbird		Museo Argentino de Ciencias Naturales		Mimus
BARG	KBARG262-07	MACN-Or-ct 2726	MDE 311		694[0n]	2	0	Yes	FJ027815			12-Nov-2006	Mimus patagonicus		Patagonian Mockingbird		University of Kansas, Natural History Museum		Mimus
BARG	KBARG239-07	MACN-Or-ct 2739		MACN-Or 70674	694[0n]	2	0	Yes	FJ027814			14-Nov-2006	Mimus patagonicus		Patagonian Mockingbird		Museo Argentino de Ciencias Naturales		Mimus
BARG	KBARG215-07	MACN-Or-ct 2709		MACN-Or 70659	694[0n]	2	0	Yes	FJ027813			11-Nov-2006	Mimus patagonicus		Patagonian Mockingbird		Museo Argentino de Ciencias Naturales		Mimus
BARG	KBAR466-06	MACN-Or-ct 1289	KGM 1125	MACN-Or 69561	694[0n]	2	0	Yes	FJ027812			12-Nov-2005	Mimus patagonicus		Patagonian Mockingbird		Museo Argentino de Ciencias Naturales		Mimus
BARG	KAARG181-07	MACN-Or-ct 2148		MACN-Or 70237	694[2n]	2	0	Yes	FJ027822			13-May-2007	Mimus saturninus		Chalk-browed Mockingbird		Museo Argentino de Ciencias Naturales		Mimus
BARG	KBAR510-06	MACN-Or-ct 1422		MACN-Or 69666	694[0n]	2	0	Yes	FJ027821			27-Apr-2006	Mimus saturninus		Chalk-browed Mockingbird		Museo Argentino de Ciencias Naturales		Mimus
BARG	KBAR367-06	MACN-Or-ct 036		MACN-Or 68348	694[4n]	2	0	Yes	FJ027820			12-Nov-2003	Mimus saturninus		Chalk-browed Mockingbird		Museo Argentino de Ciencias Naturales	Originally entered as "Mimus triurus"	Mimus
BARG	KBAR387-06	MACN-Or-ct 268		MACN-Or 68961	694[2n]	2	0	Yes	FJ027819			26-Sep-2005	Mimus saturninus		Chalk-browed Mockingbird		Museo Argentino de Ciencias Naturales		Mimus
BARG	KBAR386-06	MACN-Or-ct 256		MACN-Or 68838	694[2n]	2	0	Yes	FJ027818			25-Aug-2005	Mimus saturninus		Chalk-browed Mockingbird		Museo Argentino de Ciencias Naturales		Mimus
BARG	KBAR518-06	MACN-Or-ct 1439		MACN-Or 69683	694[1n]	2	0	Yes	FJ027817			28-Apr-2006	Mimus saturninus		Chalk-browed Mockingbird		Museo Argentino de Ciencias Naturales		Mimus
BARG	KAARG200-07	MACN-Or-ct 2169		MACN-Or 70258	694[0n]	2	0	Yes	FJ027830			13-Jun-2007	Mimus triurus		White-banded Mockingbird		Museo Argentino de Ciencias Naturales		Mimus
BARG	KAARG197-07	MACN-Or-ct 2166		MACN-Or 70255	682[0n]	2	0	Yes	FJ027829			12-Jun-2007	Mimus triurus		White-banded Mockingbird		Museo Argentino de Ciencias Naturales		Mimus
BARG	KBARG334-07	MACN-Or-ct 2808		MACN-Or 70709	694[0n]	2	0	Yes	FJ027828			18-Nov-2006	Mimus triurus		White-banded Mockingbird		Museo Argentino de Ciencias Naturales		Mimus
BARG	KBARG285-07	MACN-Or-ct 2836		MACN-Or 70724	694[0n]	2	0	Yes	FJ027827			19-Nov-2006	Mimus triurus		White-banded Mockingbird		Museo Argentino de Ciencias Naturales		Mimus
BARG	KBAR906-06	MACN-Or-ct 1680	MB 128	MACN-Or 69886	694[0n]	2	0	Yes	FJ027826			24-May-2006	Mimus triurus		White-banded Mockingbird		Museo Argentino de Ciencias Naturales		Mimus
BARG	KBAR851-06	MACN-Or-ct 1608	MB 56	MACN-Or 69313	694[0n]	2	0	Yes	FJ027825			07-May-2006	Mimus triurus		White-banded Mockingbird		Museo Argentino de Ciencias Naturales		Mimus
BARG	KBAR580-06	MACN-Or-ct 1540		MACN-Or 69775	694[0n]	2	0	Yes	FJ027824			01-May-2006	Mimus triurus		White-banded Mockingbird		Museo Argentino de Ciencias Naturales		Mimus
BARG	KBAR361-06	MACN-Or-ct 024		MACN-Or 68347	694[3n]	2	0	Yes	FJ027823			09-Nov-2003	Mimus triurus		White-banded Mockingbird		Museo Argentino de Ciencias Naturales		Mimus
BARG	KBARG336-07	MACN-Or-ct 2906		MACN-Or 69271	694[0n]	2	0	Yes	FJ027833			11-Dec-2006	Mionectes rufiventris		Gray-hooded Flycatcher		Museo Argentino de Ciencias Naturales		Mionectes
BARG	KBARG328-07	MACN-Or-ct 2905		MACN-Or 70758	694[0n]	2	0	Yes	FJ027832			11-Dec-2006	Mionectes rufiventris		Gray-hooded Flycatcher		Museo Argentino de Ciencias Naturales		Mionectes
BARG	KBARG290-07	MACN-Or-ct 2884		MACN-Or 69270	694[0n]	2	0	Yes	FJ027831			10-Dec-2006	Mionectes rufiventris		Gray-hooded Flycatcher		Museo Argentino de Ciencias Naturales		Mionectes
BARG	KBARG164-07	MACN-Or-ct 2045	GSC 194	MACN-Or-pict 2045 (picture)	694[2n]	2	0	Yes	FJ027834			20-Oct-2006	Mionectes rufiventris		Gray-hooded Flycatcher		Museo Argentino de Ciencias Naturales		Mionectes
BARG	KBARG365-07	MACN-Or-ct 2835		MACN-Or 70723	694[0n]	2	0	Yes	FJ027867			19-Nov-2006	Myiarchus swainsoni		Swainson's Flycatcher		Museo Argentino de Ciencias Naturales		Myiarchus
BARG	KBAR358-06	MACN-Or-ct 009		MACN-Or 68373	694[3n]	2	0	Yes	FJ027866			07-Nov-2003	Myiarchus swainsoni		Swainson's Flycatcher		Museo Argentino de Ciencias Naturales		Myiarchus
BARG	KBAR145-06	MACN-Or-ct 951	ASB 005	MACN-Or 69097	694[0n]	2	0	Yes	FJ027870			25-Oct-2005	Myiarchus tuberculifer		Dusky-capped Flycatcher		Museo Argentino de Ciencias Naturales		Myiarchus
BARG	KBAR144-06	MACN-Or-ct 889	MDE 209	KUNHM 96950	694[0n]	2	0	Yes	FJ027869			11-Nov-2005	Myiarchus tuberculifer		Dusky-capped Flycatcher		University of Kansas, Natural History Museum		Myiarchus
BARG	KBAR143-06	MACN-Or-ct 742	MBR 6880	MACN-Or 68983	694[0n]	2	0	Yes	FJ027868			25-Oct-2005	Myiarchus tuberculifer		Dusky-capped Flycatcher		Museo Argentino de Ciencias Naturales	Barcode identified specimen as Poospiza erythrophrys, error originated from inverted tube numbers in the field. Sequence was consequently taken offline.	Myiarchus
BARG	KAARG625-07	MACN-Or-ct 3275		MACN-Or 70980	687[2n]	2	0	Yes	FJ027875			02-Aug-2007	Myiarchus tyrannulus		Brown-crested Flycatcher		Museo Argentino de Ciencias Naturales	28.0 g	Myiarchus
BARG	KBAR892-06	MACN-Or-ct 1662	MB 110	MACN-Or 69869	694[0n]	2	0	Yes	FJ027874			18-May-2006	Myiarchus tyrannulus		Brown-crested Flycatcher		Museo Argentino de Ciencias Naturales	Originally entered as "Myiarchus swainsoni"	Myiarchus
BARG	KBAR887-06	MACN-Or-ct 1657	MB 105	MACN-Or 69866	694[0n]	2	0	Yes	FJ027873			17-May-2006	Myiarchus tyrannulus		Brown-crested Flycatcher		Museo Argentino de Ciencias Naturales	Originally entered as "Myiarchus swainsoni"	Myiarchus
BARG	KBAR519-06	MACN-Or-ct 1444		MACN-Or 69688	694[0n]	2	0	Yes	FJ027872			28-Apr-2006	Myiarchus tyrannulus		Brown-crested Flycatcher		Museo Argentino de Ciencias Naturales	Originally entered as "Myiarchus ferox"	Myiarchus
BARG	KBAR146-06	MACN-Or-ct 707	MDE 109	KUNHM 96852	694[0n]	2	0	Yes	FJ027871			23-Oct-2005	Myiarchus tyrannulus		Brown-crested Flycatcher		University of Kansas, Natural History Museum		Myiarchus
BARG	KBARG028-07	MACN-Or-ct 1787		MACN-Or 69990	694[0n]	2	0	Yes	FJ027882			02-Oct-2006	Myiodynastes maculatus		Streaked Flycatcher		Museo Argentino de Ciencias Naturales		Myiodynastes
BARG	KBARG052-07	MACN-Or-ct 1803		MACN-Or 70006	693[1n]	2	0	Yes	FJ027883			06-Oct-2006	Myiodynastes maculatus		Streaked Flycatcher		Museo Argentino de Ciencias Naturales		Myiodynastes
BARG	KBAR343-06	MACN-Or-ct 977	PB 009		694[0n]	2	0	Yes	FJ027881			28-Oct-2005	Myiodynastes maculatus		Streaked Flycatcher		Cornell University, Museum of Vertebrates		Myiodynastes
BARG	KBAR149-06	MACN-Or-ct 903	MDE 218	KUNHM 96951	694[0n]	2	0	Yes	FJ027880			12-Nov-2005	Myiodynastes maculatus		Streaked Flycatcher		University of Kansas, Natural History Museum		Myiodynastes
BARG	KBAR147-06	MACN-Or-ct 1119	MJA 199		694[0n]	2	0	Yes	FJ027879			11-Nov-2005	Myiodynastes maculatus		Streaked Flycatcher		Cornell University, Museum of Vertebrates		Myiodynastes
BARG	KBARG319-07	MACN-Or-ct 2921		MACN-Or69273	602[0n]	2	0	Yes	FJ027897			12-Dec-2006	Myiozetetes similis		Social Flycatcher		Museo Argentino de Ciencias Naturales		Myiozetetes
BARG	KAARG037-07	MACN-Or-ct 316		MACN-Or 69500	694[3n]	2	0	Yes	FJ027898			01-Dec-2004	Neoxolmis rufiventris		Chocolate-vented Tyrant		Museo Argentino de Ciencias Naturales		Neoxolmis
BARG	KAARG243-07	MACN-Or-ct 2238		MACN-Or 70327	694[0n]	2	0	Yes	FJ027904			01-Jun-2007	Netta peposaca		Rosy-billed Pochard		Museo Argentino de Ciencias Naturales		Netta
BARG	KAARG239-07	MACN-Or-ct 2233		MACN-Or 70322	694[0n]	2	0	Yes	FJ027903			14-Jun-2007	Netta peposaca		Rosy-billed Pochard		Museo Argentino de Ciencias Naturales		Netta
BARG	KAARG238-07	MACN-Or-ct 2230		MACN-Or 70319	687[0n]	2	0	Yes	FJ027902			14-Jun-2007	Netta peposaca		Rosy-billed Pochard		Museo Argentino de Ciencias Naturales		Netta
BARG	KAARG223-07	MACN-Or-ct 2203		MACN-Or 70292	689[1n]	2	0	Yes	FJ027901				Netta peposaca		Rosy-billed Pochard		Museo Argentino de Ciencias Naturales		Netta
BARG	KAARG236-07	MACN-Or-ct 2227		MACN-Or 70316	692[0n]	2	0	Yes	FJ027900				Netta peposaca		Rosy-billed Pochard		Museo Argentino de Ciencias Naturales		Netta
BARG	KBAR617-06	MACN-Or-ct 252		MACN-Or 69475	682[0n]	2	0	Yes	FJ027899			01-Aug-2005	Netta peposaca		Rosy-billed Pochard		Museo Argentino de Ciencias Naturales		Netta
BARG	KAARG463-07	MACN-Or-cp 79		MACN-Or 64554	691[0n]	2	0	Yes	FJ027907			17-Jul-1995	Nothoprocta cinerascens		Brushland Tinamou		Museo Argentino de Ciencias Naturales		Nothoprocta
BARG	KBAR001-06	MACN-Or-ct 1229	KGM 1213	MACN-Or 68992	694[0n]	2	0	Yes	FJ027908			29-Nov-2005	Nothura darwinii		Darwin's Nothura		Museo Argentino de Ciencias Naturales		Nothura
BARG	KAARG187-07	MACN-Or-ct 2154		MACN-Or 70243	694[1n]	2	0	Yes	FJ027912			14-May-2007	Nothura maculosa		Spotted Nothura		Museo Argentino de Ciencias Naturales		Nothura
BARG	KBAR849-06	MACN-Or-ct 1606	MB 54	MACN-Or 69822	694[0n]	2	0	Yes	FJ027911			07-May-2006	Nothura maculosa		Spotted Nothura		Museo Argentino de Ciencias Naturales		Nothura
BARG	KBAR842-06	MACN-Or-ct 1596	MB 44	MACN-Or 69328	694[0n]	2	0	Yes	FJ027910			04-May-2006	Nothura maculosa		Spotted Nothura		Museo Argentino de Ciencias Naturales		Nothura
BARG	KBAR557-06	MACN-Or-ct 1510		MACN-Or 69751	694[0n]	2	0	Yes	FJ027909			29-Apr-2006	Nothura maculosa		Spotted Nothura		Museo Argentino de Ciencias Naturales		Nothura
BARG	KBARG103-07	MACN-Or-ct 1837		MACN-Or 70039	694[0n]	2	0	Yes	FJ027913			19-Oct-2006	Nyctibius griseus		Common Potoo		Museo Argentino de Ciencias Naturales		Nyctibius
BARG	KBAR939-06	MACN-Or-ct 1719	MB 167	MACN-Or 69922	694[0n]	2	0	Yes	FJ027914			02-Jun-2006	Nycticorax nycticorax		Black-crowned Night-Heron		Museo Argentino de Ciencias Naturales		Nycticorax
BARG	KBAR891-06	MACN-Or-ct 1661	MB 109	MACN-Or 69305	694[0n]	2	0	Yes	FJ027915			18-May-2006	Nyctidromus albicollis		Pauraque		Museo Argentino de Ciencias Naturales		Nyctidromus
BARG	KAARG393-07	MACN-Or-cp 9		MACN-Or 66718	567[0n]	2	0	Yes	FJ027916			11-Feb-1996	Nystalus chacuru		White-eared Puffbird		Museo Argentino de Ciencias Naturales		Nystalus
BARG	KBAR152-06	MACN-Or-ct 1078	KSB 655	MACN-Or 69160	694[0n]	2	0	Yes	FJ027922			07-Nov-2005	Ochthoeca oenanthoides		D'Orbigny's Chat-Tyrant		Museo Argentino de Ciencias Naturales		Ochthoeca
BARG	KAARG133-07	MACN-Or-ct 2087		MACN-Or 70177	694[1n]	2	0	Yes	FJ027933				Pachyramphus polychopterus		White-winged Becard		Museo Argentino de Ciencias Naturales		Pachyramphus
BARG	KAARG122-07	MACN-Or-ct 2071		MACN-Or 70161	694[1n]	2	0	Yes	FJ027932			25-Nov-2006	Pachyramphus polychopterus		White-winged Becard		Museo Argentino de Ciencias Naturales		Pachyramphus
BARG	KBAR155-06	MACN-Or-ct 717	MDE 114	KUNHM 96856	694[0n]	2	0	Yes	FJ027936			23-Oct-2005	Pachyramphus validus		Crested Becard		University of Kansas, Natural History Museum		Pachyramphus
BARG	KBAR153-06	MACN-Or-ct 1131	KSB 679		694[0n]	2	0	Yes	FJ027935			12-Nov-2005	Pachyramphus validus		Crested Becard		Cornell University, Museum of Vertebrates		Pachyramphus
BARG	KBAR154-06	MACN-Or-ct 1146	FBG 028	MACN-Or 69185	694[0n]	2	0	Yes	FJ027934			13-Nov-2005	Pachyramphus validus		Crested Becard		Museo Argentino de Ciencias Naturales		Pachyramphus
BARG	KAARG277-07	MACN-Or-ct 2368		MACN-Or 70457	694[0n]	2	0	Yes	FJ027938			04-Apr-2007	Pachyramphus viridis		Green-backed Becard		Museo Argentino de Ciencias Naturales		Pachyramphus
BARG	KAARG608-07	MACN-Or-ct 3239		MACN-Or 70944	677[2n]	2	0	Yes	FJ027937			29-Jul-2007	Pachyramphus viridis		Green-backed Becard		Museo Argentino de Ciencias Naturales	20.9 g	Pachyramphus
BARG	KAARG591-07	MACN-Or-ct 3216		MACN-Or 70921	674[0n]	2	0	Yes	FJ027947			27-Jul-2007	Paroaria capitata		Yellow-billed Cardinal		Museo Argentino de Ciencias Naturales	22.9 g	Paroaria
BARG	KAARG592-07	MACN-Or-ct 3217		MACN-Or 70922	673[0n]	2	0	Yes	FJ027946			27-Jul-2007	Paroaria capitata		Yellow-billed Cardinal		Museo Argentino de Ciencias Naturales	24.1 g	Paroaria
BARG	KAARG146-07	MACN-Or-ct 2112		MACN-Or 70201	677[0n]	2	0	Yes	FJ027945			09-May-2007	Paroaria capitata		Yellow-billed Cardinal		Museo Argentino de Ciencias Naturales		Paroaria
BARG	KAARG167-07	MACN-Or-ct 2134		MACN-Or 70223	681[0n]	2	0	Yes	FJ027944			10-May-2007	Paroaria capitata		Yellow-billed Cardinal		Museo Argentino de Ciencias Naturales		Paroaria
BARG	KBAR790-06	MACN-Or-ct 1452		MACN-Or 69693	694[0n]	2	0	Yes	FJ027943			28-Apr-2006	Paroaria capitata		Yellow-billed Cardinal		Museo Argentino de Ciencias Naturales		Paroaria
BARG	KBAR787-06	MACN-Or-ct 1447		MACN-Or 69691	694[0n]	2	0	Yes	FJ027942			28-Apr-2006	Paroaria capitata		Yellow-billed Cardinal		Museo Argentino de Ciencias Naturales		Paroaria
BARG	KBAR774-06	MACN-Or-ct 1406		MACN-Or 69650	694[0n]	2	0	Yes	FJ027941			27-Apr-2006	Paroaria capitata		Yellow-billed Cardinal		Museo Argentino de Ciencias Naturales		Paroaria
BARG	KAARG573-07	MACN-Or-ct 3189		MACN-Or 70894	675[0n]	2	0	Yes	FJ027952			22-Jul-2007	Paroaria coronata		Red-crested Cardinal		Museo Argentino de Ciencias Naturales	33.4 g	Paroaria
BARG	KAARG572-07	MACN-Or-ct 3188		MACN-Or 70893	659[0n]	2	0	Yes	FJ027951			22-Jul-2007	Paroaria coronata		Red-crested Cardinal		Museo Argentino de Ciencias Naturales	39.8 g	Paroaria
BARG	KBAR799-06	MACN-Or-ct 1490		MACN-Or 69732	694[0n]	2	0	Yes	FJ027950			29-Apr-2006	Paroaria coronata		Red-crested Cardinal		Museo Argentino de Ciencias Naturales		Paroaria
BARG	KBAR775-06	MACN-Or-ct 1418		MACN-Or 69662	694[0n]	2	0	Yes	FJ027949			27-Apr-2006	Paroaria coronata		Red-crested Cardinal		Museo Argentino de Ciencias Naturales		Paroaria
BARG	KBAR755-06	MACN-Or-ct 1353		MACN-Or 69620	694[0n]	2	0	Yes	FJ027948			25-Apr-2006	Paroaria coronata		Red-crested Cardinal		Museo Argentino de Ciencias Naturales		Paroaria
BARG	KBAR064-06	MACN-Or-ct 757	MBR 6889	KUNHM 96849	694[0n]	2	0	Yes	FJ027986			27-Oct-2005	Phacellodomus maculipectus		Spot-breasted Thornbird		University of Kansas, Natural History Museum		Phacellodomus
BARG	KAARG604-07	MACN-Or-ct 3233		MACN-Or 70938	682[1n]	2	0	Yes	FJ027994			29-Jul-2007	Phacellodomus ruber		Greater Thornbird		Museo Argentino de Ciencias Naturales	32.0 g	Phacellodomus
BARG	KAARG548-07	MACN-Or-ct 3158		MACN-Or 70863	672[0n]	2	0	Yes	FJ027992			19-Jul-2007	Phacellodomus ruber		Greater Thornbird		Museo Argentino de Ciencias Naturales	35.7 g	Phacellodomus
BARG	KBARG095-07	MACN-Or-ct 1836		MACN-Or 70038	694[1n]	2	0	Yes	FJ027993			18-Oct-2006	Phacellodomus ruber		Greater Thornbird		Museo Argentino de Ciencias Naturales		Phacellodomus
BARG	KBAR859-06	MACN-Or-ct 1620	MB 68	MACN-Or 69832	694[0n]	2	0	Yes	FJ027991			08-May-2006	Phacellodomus ruber		Greater Thornbird		Museo Argentino de Ciencias Naturales		Phacellodomus
BARG	KBAR764-06	MACN-Or-ct 1382		MACN-Or 69347	694[0n]	2	0	Yes	FJ027990			26-Apr-2006	Phacellodomus ruber		Greater Thornbird		Museo Argentino de Ciencias Naturales	It was originally entered as "Phacellodomus striaticollis"	Phacellodomus
BARG	KBAR596-06	MACN-Or-ct 1420		MACN-Or 69664	694[0n]	2	0	Yes	FJ027989			27-Apr-2006	Phacellodomus ruber		Greater Thornbird		Museo Argentino de Ciencias Naturales	Originally entered as "Phacellodomus striaticollis"	Phacellodomus
BARG	KBAR595-06	MACN-Or-ct 1377		MACN-Or 69348	694[0n]	2	0	Yes	FJ027988			26-Apr-2006	Phacellodomus ruber		Greater Thornbird		Museo Argentino de Ciencias Naturales	Originally entered as "Phacellodomus striaticollis"	Phacellodomus
BARG	KBAR594-06	MACN-Or-ct 1362		MACN-Or 69346	694[0n]	2	0	Yes	FJ027987			26-Apr-2006	Phacellodomus ruber		Greater Thornbird		Museo Argentino de Ciencias Naturales	Originally entered as "Phacellodomus striaticollis"	Phacellodomus
BARG	KBAR065-06	MACN-Or-ct 794	MBR 6900	MACN-Or 69076	694[0n]	2	0	Yes	FJ027995			31-Oct-2005	Phacellodomus rufifrons		Common Thornbird		Museo Argentino de Ciencias Naturales		Phacellodomus
BARG	KBAR066-06	MACN-Or-ct 1015	KSB 633	MACN-Or 69121	694[0n]	2	0	Yes	FJ027996			03-Nov-2005	Phacellodomus striaticeps		Streak-fronted Thornbird		Museo Argentino de Ciencias Naturales		Phacellodomus
BARG	KAARG184-07	MACN-Or-ct 2151		MACN-Or 70240	694[0n]	2	0	Yes	FJ027999			13-May-2007	Phacellodomus striaticollis		Freckle-breasted Thornbird		Museo Argentino de Ciencias Naturales		Phacellodomus
BARG	KAARG215-07	MACN-Or-ct 2187		MACN-Or 70276	675[0n]	2	0	Yes	FJ027998			15-Jun-2007	Phacellodomus striaticollis		Freckle-breasted Thornbird		Museo Argentino de Ciencias Naturales		Phacellodomus
BARG	KAARG205-07	MACN-Or-ct 2176		MACN-Or 70265	679[0n]	2	0	Yes	FJ027997			13-Jun-2007	Phacellodomus striaticollis		Freckle-breasted Thornbird		Museo Argentino de Ciencias Naturales		Phacellodomus
BARG	KBAR156-06	MACN-Or-ct 795	MBR 6901	KUNHM 96872	644[0n]	2	0	Yes	FJ028001			31-Oct-2005	Phaeomyias murina		Mouse-colored Tyrannulet		University of Kansas, Natural History Museum		Phaeomyias
BARG	KBAR169-06	MACN-Or-ct 998	MJA 156	MACN-Or 69127	645[0n]	2	0	Yes	FJ028000			31-Oct-2005	Phaeomyias murina		Mouse-colored Tyrannulet		Museo Argentino de Ciencias Naturales	Originally entered as "Sublegatus modestus"	Phaeomyias
BARG	KBARG410-07	MACN-Or-ct 2941		MACN-Or 70778	694[0n]	2	0	Yes	FJ028003			14-Dec-2006	Phaethornis eurynome		Scale-throated Hermit		Museo Argentino de Ciencias Naturales		Phaethornis
BARG	KBARG400-07	MACN-Or-ct 2970		MACN-Or 70785	694[0n]	2	0	Yes	FJ028002			18-Dec-2006	Phaethornis eurynome		Scale-throated Hermit		Museo Argentino de Ciencias Naturales		Phaethornis
BARG	KBARG086-07	MACN-Or-ct 1343		MACN-Or 69610	694[0n]	2	0	Yes	FJ028006				Phalacrocorax atriceps		Imperial Shag		Museo Argentino de Ciencias Naturales		Phalacrocorax
BARG	KBARG023-07	MACN-Or-ct 1342		MACN-Or 69609	694[0n]	2	0	Yes	FJ028005				Phalacrocorax atriceps		Imperial Shag		Museo Argentino de Ciencias Naturales		Phalacrocorax
BARG	KBARG071-07	MACN-Or-ct 1796		MACN-Or 69999	694[0n]	2	0	Yes	FJ028009			05-Oct-2006	Phalacrocorax brasilianus		Neotropic Cormorant		Museo Argentino de Ciencias Naturales		Phalacrocorax
BARG	KBARG019-07	MACN-Or-ct 1739		MACN-Or 69942	694[0n]	2	0	Yes	FJ028008			14-Sep-2006	Phalacrocorax brasilianus		Neotropic Cormorant		Museo Argentino de Ciencias Naturales		Phalacrocorax
BARG	KBAR392-06	MACN-Or-ct 383		MACN-Or 69042	694[0n]	2	0	Yes	FJ028007			10-Jan-2006	Phalacrocorax brasilianus		Neotropic Cormorant		Museo Argentino de Ciencias Naturales	Phalacrocorax brasilianus (olivaceus)	Phalacrocorax
BARG	KBARG397-07	MACN-Or-ct 2955		MACN-Or 69222	694[0n]	2	0	Yes	FJ028014			15-Dec-2006	Philydor atricapillus	I	Black-capped Foliage-gleaner		Museo Argentino de Ciencias Naturales		Philydor
BARG	KBARG356-07	MACN-Or-ct 2847		MACN-Or 70732	694[0n]	2	0	Yes	FJ028013			07-Dec-2006	Philydor atricapillus		Black-capped Foliage-gleaner		Museo Argentino de Ciencias Naturales		Philydor
BARG	KAARG378-07	MACN-Or-ct 2033	GSC 182	MACN-Or-pict 2033 (picture)	694[0n]	2	0	Yes	FJ028015			22-Oct-2006	Philydor lichtensteini		Ochre-breasted Foliage-gleaner		Museo Argentino de Ciencias Naturales		Philydor
BARG	KBAR158-06	MACN-Or-ct 888	MBR 6949		694[0n]	2	0	Yes	FJ028060			11-Nov-2005	Phyllomyias sclateri		Sclater's Tyrannulet		Cornell University, Museum of Vertebrates		Phyllomyias
BARG	KBAR159-06	MACN-Or-ct 896	MBR 6951	KUNHM 96946	694[0n]	2	0	Yes	FJ028059			12-Nov-2005	Phyllomyias sclateri		Sclater's Tyrannulet		University of Kansas, Natural History Museum		Phyllomyias
BARG	KBAR157-06	MACN-Or-ct 1148	MJA 207		680[0n]	1	0	No	FJ028058			13-Nov-2005	Phyllomyias sclateri		Sclater's Tyrannulet		Cornell University, Museum of Vertebrates		Phyllomyias
BARG	KBARG037-07	MACN-Or-ct 769	MBR 6891	KUNHM 96848	694[0n]	2	0	Yes	FJ028061			28-Oct-2005	Phylloscartes ventralis		Mottle-cheeked Tyrannulet		University of Kansas, Natural History Museum		Phylloscartes
BARG	KBAR161-06	MACN-Or-ct 981	KSB 623	MACN-Or 69126	694[0n]	2	0	Yes	FJ028062			28-Oct-2005	Phylloscartes ventralis		Mottle-cheeked Tyrannulet		Museo Argentino de Ciencias Naturales		Phylloscartes
BARG	KBAR834-06	MACN-Or-ct 1586	MB 34	MACN-Or 69303	694[0n]	2	0	Yes	FJ028075			04-May-2006	Piaya cayana		Squirrel Cuckoo		Museo Argentino de Ciencias Naturales		Piaya
BARG	KBAR485-06	MACN-Or-ct 1366		MACN-Or 69630	694[0n]	2	0	Yes	FJ028074			26-Apr-2006	Piaya cayana		Squirrel Cuckoo		Museo Argentino de Ciencias Naturales		Piaya
BARG	KBAR484-06	MACN-Or-ct 1365		MACN-Or 69629	694[0n]	2	0	Yes	FJ028073			26-Apr-2006	Piaya cayana		Squirrel Cuckoo		Museo Argentino de Ciencias Naturales		Piaya
BARG	KAARG281-07	MACN-Or-ct 2372		MACN-Or 70461	694[0n]	2	0	Yes	FJ028086			02-May-2007	Piculus chrysochloros		Golden-green Woodpecker		Museo Argentino de Ciencias Naturales		Piculus
BARG	KBARG142-07	MACN-Or-ct 1825		MACN-Or 70027	680[3n]	2	0	Yes	FJ028085			15-Oct-2006	Piculus chrysochloros		Golden-green Woodpecker		Museo Argentino de Ciencias Naturales		Piculus
BARG	KBAR512-06	MACN-Or-ct 1427		MACN-Or 69671	694[0n]	2	0	Yes	FJ028084			27-Apr-2006	Piculus chrysochloros		Golden-green Woodpecker		Museo Argentino de Ciencias Naturales		Piculus
BARG	KAARG582-07	MACN-Or-ct 3200		MACN-Or 70905	671[0n]	2	0	Yes	FJ028088			23-Jul-2007	Picumnus cirratus		White-barred Piculet		Museo Argentino de Ciencias Naturales	8.1 g	Picumnus
BARG	KBAR907-06	MACN-Or-ct 1681	MB 129	MACN-Or 69887	694[0n]	2	0	Yes	FJ028092			23-May-2006	Picumnus cirratus		White-barred Piculet		Museo Argentino de Ciencias Naturales		Picumnus
BARG	KBAR760-06	MACN-Or-ct 1372		MACN-Or 69344	694[0n]	2	0	Yes	FJ028091			26-Apr-2006	Picumnus cirratus		White-barred Piculet		Museo Argentino de Ciencias Naturales		Picumnus
BARG	KBAR032-06	MACN-Or-ct 883	MBR 6945	KUNHM 96938	694[0n]	2	0	Yes	FJ028090			18-Nov-2005	Picumnus cirratus		White-barred Piculet		University of Kansas, Natural History Museum		Picumnus
BARG	KBAR031-06	MACN-Or-ct 719	MBR 6864	MACN-Or 69147	694[0n]	2	0	Yes	FJ028089			24-Oct-2005	Picumnus cirratus		White-barred Piculet		Museo Argentino de Ciencias Naturales		Picumnus
BARG	KBAR033-06	MACN-Or-ct 886	MBR 6948	KUNHM 96937	683[0n]	2	0	Yes	FJ028087			11-Nov-2005	Picumnus cirratus		White-barred Piculet		University of Kansas, Natural History Museum		Picumnus
BARG	KBARG311-07	MACN-Or-ct 2919		MACN-Or 70768	657[0n]	2	0	Yes	FJ028094			12-Dec-2006	Picumnus temminckii		Ochre-collared Piculet		Museo Argentino de Ciencias Naturales		Picumnus
BARG	KBARG178-07	MACN-Or-ct 2038	GSC 187	MACN-Or 70150	694[0n]	2	0	Yes	FJ028093			20-Oct-2006	Picumnus temminckii		Ochre-collared Piculet		Museo Argentino de Ciencias Naturales		Picumnus
BARG	KAARG538-07	MACN-Or-ct 3041		MACN-Or 69250	694[0n]	2	0	Yes	FJ028098			23-Sep-2006	Pipra fasciicauda		Band-tailed Manakin		Museo Argentino de Ciencias Naturales	suspected female	Pipra
BARG	KBARG406-07	MACN-Or-ct 2940		MACN-Or 69249	694[0n]	2	0	Yes	FJ028097			14-Dec-2006	Pipra fasciicauda		Band-tailed Manakin		Museo Argentino de Ciencias Naturales		Pipra
BARG	KBARG306-07	MACN-Or-ct 2868		MACN-Or 70738	694[0n]	2	0	Yes	FJ028101			09-Dec-2006	Pipra fasciicauda		Band-tailed Manakin		Museo Argentino de Ciencias Naturales		Pipra
BARG	KBAR267-06	MACN-Or-ct 1147	PB 033	MACN-Or 69198	694[0n]	2	0	Yes	FJ028100			13-Nov-2005	Pipraeidea melanonota		Fawn-breasted Tanager		Museo Argentino de Ciencias Naturales		Pipraeidea
BARG	KBAR268-06	MACN-Or-ct 918	MDE 225	KUNHM 96926	694[0n]	2	0	Yes	FJ028099			13-Nov-2005	Pipraeidea melanonota		Fawn-breasted Tanager		University of Kansas, Natural History Museum		Pipraeidea
BARG	KAARG177-07	MACN-Or-ct 2144		MACN-Or 70233	694[5n]	2	0	Yes	FJ028102			10-May-2007	Piranga flava		Hepatic Tanager		Museo Argentino de Ciencias Naturales		Piranga
BARG	KAARG603-07	MACN-Or-ct 3231		MACN-Or 70936	678[0n]	2	0	Yes	FJ028110			29-Jul-2007	Pitangus sulphuratus		Great Kiskadee		Museo Argentino de Ciencias Naturales	67.0 g	Pitangus
BARG	KAARG551-07	MACN-Or-ct 3163		MACN-Or 70868	688[1n]	2	0	Yes	FJ028107			20-Jul-2007	Pitangus sulphuratus		Great Kiskadee		Museo Argentino de Ciencias Naturales	59.3 g	Pitangus
BARG	KBARG368-07	MACN-Or-ct 2913		MACN-Or 70765	694[0n]	2	0	Yes	FJ028106			12-Dec-2006	Pitangus sulphuratus		Great Kiskadee		Museo Argentino de Ciencias Naturales		Pitangus
BARG	KBARG320-07	MACN-Or-ct 2904		MACN-Or 70757	694[0n]	2	0	Yes	FJ028105			11-Dec-2006	Pitangus sulphuratus		Great Kiskadee		Museo Argentino de Ciencias Naturales		Pitangus
BARG	KBAR888-06	MACN-Or-ct 1658	MB 106	MACN-Or 69310	694[0n]	2	0	Yes	FJ028109			17-May-2006	Pitangus sulphuratus		Great Kiskadee		Museo Argentino de Ciencias Naturales		Pitangus
BARG	KBAR554-06	MACN-Or-ct 1501		MACN-Or 69742	694[0n]	2	0	Yes	FJ028108			29-Apr-2006	Pitangus sulphuratus		Great Kiskadee		Museo Argentino de Ciencias Naturales		Pitangus
BARG	KBAR381-06	MACN-Or-ct 063		MACN-Or 68552	694[2n]	2	0	Yes	FJ028104			14-Oct-2003	Pitangus sulphuratus		Great Kiskadee		Museo Argentino de Ciencias Naturales		Pitangus
BARG	KBAR555-06	MACN-Or-ct 1504		MACN-Or 69745	694[1n]	2	0	Yes	FJ028103			29-Apr-2006	Pitangus sulphuratus		Great Kiskadee		Museo Argentino de Ciencias Naturales		Pitangus
BARG	KAARG536-07	MACN-Or-ct 2960		MACN-Or 69229	643[0n]	2	0	Yes	FJ028115			15-Dec-2006	Platyrinchus mystaceus	A	White-throated Spadebill		Museo Argentino de Ciencias Naturales	8.7 g	Platyrinchus
BARG	KBARG384-07	MACN-Or-ct 2966		MACN-Or 70784	694[0n]	2	0	Yes	FJ028114			16-Dec-2006	Platyrinchus mystaceus		White-throated Spadebill		Museo Argentino de Ciencias Naturales		Platyrinchus
BARG	KBARG347-07	MACN-Or-ct 2859		MACN-Or 69275	694[0n]	2	0	Yes	FJ028113			09-Dec-2006	Platyrinchus mystaceus		White-throated Spadebill		Museo Argentino de Ciencias Naturales		Platyrinchus
BARG	KBAR943-06	PG3	PG 003		694[3n]	2	0	Yes	FJ028126			01-Dec-2004	Podiceps gallardoi		Hooded Grebe		Museo Argentino de Ciencias Naturales		Podiceps
BARG	KBAR942-06	PG2	PG 002		694[2n]	2	0	Yes	FJ028125			01-Dec-2004	Podiceps gallardoi		Hooded Grebe		Museo Argentino de Ciencias Naturales		Podiceps
BARG	KAARG157-07	MACN-Or-ct 2123		MACN-Or 70212	694[0n]	2	0	Yes	FJ028127			11-May-2007	Podiceps major		Great Grebe		Museo Argentino de Ciencias Naturales		Podiceps
BARG	KAARG202-07	MACN-Or-ct 2172		MACN-Or 70261	694[0n]	2	0	Yes	FJ028135			13-Jun-2007	Polioptila dumicola		Masked Gnatcatcher		Museo Argentino de Ciencias Naturales		Polioptila
BARG	KAARG198-07	MACN-Or-ct 2167		MACN-Or 70256	694[0n]	2	0	Yes	FJ028134			13-Jun-2007	Polioptila dumicola		Masked Gnatcatcher		Museo Argentino de Ciencias Naturales		Polioptila
BARG	KAARG607-07	MACN-Or-ct 3236		MACN-Or 70941	682[0n]	2	0	Yes	FJ028133			29-Jul-2007	Polioptila dumicola		Masked Gnatcatcher		Museo Argentino de Ciencias Naturales	6.5 g	Polioptila
BARG	KAARG080-07	MACN-Or-ct 1901		MACN-Or 70100	692[0n]	2	0	Yes	FJ028129			22-Nov-2006	Polioptila dumicola		Masked Gnatcatcher		Museo Argentino de Ciencias Naturales		Polioptila
BARG	KBAR828-06	MACN-Or-ct 1576	MB 24	MACN-Or 69804	694[0n]	2	0	Yes	FJ028132			03-May-2006	Polioptila dumicola		Masked Gnatcatcher		Museo Argentino de Ciencias Naturales		Polioptila
BARG	KBAR826-06	MACN-Or-ct 1573	MB 21	MACN-Or 69802	694[0n]	2	0	Yes	FJ028131			03-May-2006	Polioptila dumicola		Masked Gnatcatcher		Museo Argentino de Ciencias Naturales		Polioptila
BARG	KBAR825-06	MACN-Or-ct 1570	MB 18	MACN-Or 69334	694[0n]	2	0	Yes	FJ028130			03-May-2006	Polioptila dumicola		Masked Gnatcatcher		Museo Argentino de Ciencias Naturales		Polioptila
BARG	KBAR270-06	MACN-Or-ct 1008	MJA 162		694[0n]	2	0	Yes	FJ028138			03-Nov-2005	Poospiza baeri		Tucuman Mountain-Finch		Cornell University, Museum of Vertebrates		Poospiza
BARG	KBAR269-06	MACN-Or-ct 1006	ASB 014	MACN-Or 69134	694[0n]	2	0	Yes	FJ028137			03-Nov-2005	Poospiza baeri		Tucuman Mountain-Finch		Museo Argentino de Ciencias Naturales		Poospiza
BARG	KBAR317-06	MACN-Or-ct 828	MBR 6915	KUNHM 96805	694[1n]	2	0	Yes	FJ028136			05-Nov-2005	Poospiza baeri		Tucuman Mountain-Finch		University of Kansas, Natural History Museum		Poospiza
BARG	KBAR337-06	MACN-Or-ct 920	KSB 606		694[0n]	2	0	Yes	FJ028141			23-Oct-2005	Poospiza erythrophrys		Rusty-browed Warbling-Finch		Cornell University, Museum of Vertebrates		Poospiza
BARG	KBAR273-06	MACN-Or-ct 714	MBR 6862		694[0n]	2	0	Yes	FJ028140			23-Oct-2005	Poospiza erythrophrys		Rusty-browed Warbling-Finch		Cornell University, Museum of Vertebrates		Poospiza
BARG	KBAR272-06	MACN-Or-ct 709	MDE 110	KUNHM 96867	694[0n]	2	0	Yes	FJ028139			23-Oct-2005	Poospiza erythrophrys		Rusty-browed Warbling-Finch		University of Kansas, Natural History Museum		Poospiza
BARG	KBAR275-06	MACN-Or-ct 1010	PB 014	MACN-Or 69136	694[0n]	2	0	Yes	FJ028144			03-Nov-2005	Poospiza hypochondria		Rufous-sided Warbling-Finch		Museo Argentino de Ciencias Naturales		Poospiza
BARG	KBAR277-06	MACN-Or-ct 1061	KSB 648		694[0n]	2	0	Yes	FJ028143			05-Nov-2005	Poospiza hypochondria		Rufous-sided Warbling-Finch		Cornell University, Museum of Vertebrates		Poospiza
BARG	KBAR318-06	MACN-Or-ct 831	MDE 181	MACN-Or 69020	694[2n]	2	0	Yes	FJ028142			05-Nov-2005	Poospiza hypochondria		Rufous-sided Warbling-Finch		Museo Argentino de Ciencias Naturales		Poospiza
BARG	KAARG567-07	MACN-Or-ct 3182		MACN-Or 70887	677[0n]	2	0	Yes	FJ028148			22-Jul-2007	Poospiza melanoleuca		Black-capped Warbling-Finch		Museo Argentino de Ciencias Naturales	11.4 g	Poospiza
BARG	KAARG564-07	MACN-Or-ct 3178		MACN-Or 70883	681[0n]	2	0	Yes	FJ028147			21-Jul-2007	Poospiza melanoleuca		Black-capped Warbling-Finch		Museo Argentino de Ciencias Naturales	12.1 g	Poospiza
BARG	KBAR876-06	MACN-Or-ct 1644	MB 92	MACN-Or 69854	694[0n]	2	0	Yes	FJ028146			12-May-2006	Poospiza melanoleuca		Black-capped Warbling-Finch		Museo Argentino de Ciencias Naturales		Poospiza
BARG	KBAR868-06	MACN-Or-ct 1632	MB 80	MACN-Or 69843	694[0n]	2	0	Yes	FJ028145			10-May-2006	Poospiza melanoleuca		Black-capped Warbling-Finch		Museo Argentino de Ciencias Naturales		Poospiza
BARG	KAARG153-07	MACN-Or-ct 2119		MACN-Or 70208	694[1n]	2	0	Yes	FJ028151			09-May-2007	Poospiza nigrorufa		Black-and-rufous Warbling-Finch		Museo Argentino de Ciencias Naturales		Poospiza
BARG	KAARG211-07	MACN-Or-ct 2182		MACN-Or 70271	688[0n]	2	0	Yes	FJ028150			14-Jun-2007	Poospiza nigrorufa		Black-and-rufous Warbling-Finch		Museo Argentino de Ciencias Naturales		Poospiza
BARG	KAARG165-07	MACN-Or-ct 2132		MACN-Or 70221	694[2n]	2	0	Yes	FJ028149			10-May-2007	Poospiza nigrorufa		Black-and-rufous Warbling-Finch		Museo Argentino de Ciencias Naturales		Poospiza
BARG	KBARG279-07	MACN-Or-ct 2750		MACN-Or 70679	694[0n]	2	0	Yes	FJ028154			15-Nov-2006	Poospiza ornata		Cinnamon Warbling-Finch		Museo Argentino de Ciencias Naturales		Poospiza
BARG	KBARG273-07	MACN-Or-ct 2795		MACN-Or 70702	694[0n]	2	0	Yes	FJ028153			17-Nov-2006	Poospiza ornata		Cinnamon Warbling-Finch		Museo Argentino de Ciencias Naturales		Poospiza
BARG	KBAR384-06	MACN-Or-ct 190		MACN-Or 68767	694[1n]	2	0	Yes	FJ028152			29-Nov-2004	Poospiza ornata		Cinnamon Warbling-Finch		Museo Argentino de Ciencias Naturales		Poospiza
BARG	KBARG293-07	MACN-Or-ct 2837		MACN-Or 70725	694[0n]	2	0	Yes	FJ028156			19-Nov-2006	Poospiza torquata		Ringed Warbling-Finch		Museo Argentino de Ciencias Naturales		Poospiza
BARG	KBARG216-07	MACN-Or-ct 2755	MBR 7098		694[0n]	2	0	Yes	FJ028155			15-Nov-2006	Poospiza torquata		Ringed Warbling-Finch		University of Kansas, Natural History Museum		Poospiza
BARG	KBARG317-07	MACN-Or-ct 2824		MACN-Or 70717	694[1n]	2	0	Yes	FJ028157			18-Nov-2006	Poospiza torquata		Ringed Warbling-Finch		Museo Argentino de Ciencias Naturales		Poospiza
BARG	KBAR299-06	MACN-Or-ct 1130	MJA 204		694[0n]	2	0	Yes	FJ028159			12-Nov-2005	Psarocolius decumanus		Crested Oropendola		Cornell University, Museum of Vertebrates		Psarocolius
BARG	KBARG337-07	MACN-Or-ct 2892		MACN-Or 69243	694[0n]	2	0	Yes	FJ028177			11-Dec-2006	Pteroglossus castanotis	I	Chestnut-eared Aracari		Museo Argentino de Ciencias Naturales		Pteroglossus
BARG	KBARG299-07	MACN-Or-ct 2853		MACN-Or 69258	694[6n]	2	0	Yes	FJ028178			08-Dec-2006	Pteroglossus castanotis		Chestnut-eared Aracari		Museo Argentino de Ciencias Naturales		Pteroglossus
BARG	KBARG156-07	MACN-Or-ct 2027	GSC 176	MACN-Or-pict 2027 (picture)	694[0n]	2	0	Yes	FJ028186			20-Oct-2006	Pyriglena leucoptera		White-shouldered Fire-eye		Museo Argentino de Ciencias Naturales		Pyriglena
BARG	KBARG116-07	MACN-Or-ct 1973	GSC 122	MACN-Or-pict 1973 (picture)	672[0n]	2	0	Yes	FJ028188			20-Oct-2006	Pyriglena leucoptera		White-shouldered Fire-eye		Museo Argentino de Ciencias Naturales		Pyriglena
BARG	KBARG108-07	MACN-Or-ct 1959	GSC 108	MACN-Or-pict 1959 (picture)	677[1n]	2	0	Yes	FJ028187			20-Oct-2006	Pyriglena leucoptera		White-shouldered Fire-eye		Museo Argentino de Ciencias Naturales		Pyriglena
BARG	KBARG408-07	MACN-Or-ct 2972		MACN-Or 69232	694[2n]	2	0	Yes	FJ028196			18-Dec-2006	Pyrrhocoma ruficeps		Chestnut-headed Tanager		Museo Argentino de Ciencias Naturales		Pyrrhocoma
BARG	KBARG107-07	MACN-Or-ct 1976	GSC 125	MACN-Or 69296	694[1n]	2	0	Yes	FJ028195			20-Oct-2006	Pyrrhocoma ruficeps		Chestnut-headed Tanager		Museo Argentino de Ciencias Naturales		Pyrrhocoma
BARG	KBARG378-07	MACN-Or-ct 3051		MACN-Or 70824	694[0n]	2	0	Yes	FJ028200				Ramphastos dicolorus		Red-breasted Toucan		Museo Argentino de Ciencias Naturales		Ramphastos
BARG	KBARG419-07	MACN-Or-ct 3049		MACN-Or 70822	694[1n]	2	0	Yes	FJ028201				Ramphastos toco		Toco Toucan		Museo Argentino de Ciencias Naturales		Ramphastos
BARG	KAARG124-07	MACN-Or-ct 2074		MACN-Or 70164	694[0n]	2	0	Yes	FJ028209			26-Nov-2006	Rhynchotus rufescens		Red-winged Tinamou		Museo Argentino de Ciencias Naturales		Rhynchotus
BARG	KAARG123-07	MACN-Or-ct 2073		MACN-Or 70163	694[0n]	2	0	Yes	FJ028208			26-Nov-2006	Rhynchotus rufescens		Red-winged Tinamou		Museo Argentino de Ciencias Naturales		Rhynchotus
BARG	KAARG116-07	MACN-Or-ct 2062		MACN-Or 70152	694[1n]	2	0	Yes	FJ028207			20-Nov-2006	Rhynchotus rufescens		Red-winged Tinamou		Museo Argentino de Ciencias Naturales		Rhynchotus
BARG	KAARG094-07	MACN-Or-ct 1917		MACN-Or 70116	693[0n]	2	0	Yes	FJ028206			02-Apr-2007	Rhynchotus rufescens		Red-winged Tinamou		Museo Argentino de Ciencias Naturales		Rhynchotus
BARG	KAARG308-07	MACN-Or-ct 2790	MBR 7112		694[0n]	2	0	Yes	FJ028225			17-Nov-2006	Saltator aurantiirostris		Golden-billed Saltator		University of Kansas, Natural History Museum		Saltator
BARG	KAARG297-07	MACN-Or-ct 2411		MACN-Or 70500	694[0n]	2	0	Yes	FJ028224			01-Jun-2007	Saltator aurantiirostris		Golden-billed Saltator		Museo Argentino de Ciencias Naturales		Saltator
BARG	KAARG105-07	MACN-Or-ct 1929		MACN-Or 70128	694[0n]	2	0	Yes	FJ028223			01-May-2006	Saltator aurantiirostris		Golden-billed Saltator		Museo Argentino de Ciencias Naturales		Saltator
BARG	KAARG104-07	MACN-Or-ct 1928		MACN-Or 70127	694[0n]	2	0	Yes	FJ028222			01-Mar-2006	Saltator aurantiirostris		Golden-billed Saltator		Museo Argentino de Ciencias Naturales		Saltator
BARG	KAARG589-07	MACN-Or-ct 3214		MACN-Or 70919	669[1n]	2	0	Yes	FJ028220			27-Jul-2007	Saltator aurantiirostris		Golden-billed Saltator		Museo Argentino de Ciencias Naturales	42.2 g	Saltator
BARG	KBARG249-07	MACN-Or-ct 2787		MACN-Or 70699	694[0n]	2	0	Yes	FJ028219			17-Nov-2006	Saltator aurantiirostris		Golden-billed Saltator		Museo Argentino de Ciencias Naturales		Saltator
BARG	KBAR278-06	MACN-Or-ct 1003	PB 013	MACN-Or 69133	694[0n]	2	0	Yes	FJ028221			03-Nov-2005	Saltator aurantiirostris		Golden-billed Saltator		Museo Argentino de Ciencias Naturales		Saltator
BARG	KAARG569-07	MACN-Or-ct 3184		MACN-Or 70889	678[0n]	2	0	Yes	FJ028230			22-Jul-2007	Saltator coerulescens		Grayish Saltator		Museo Argentino de Ciencias Naturales	58.7 g	Saltator
BARG	KAARG568-07	MACN-Or-ct 3183		MACN-Or 70888	664[1n]	2	0	Yes	FJ028227			22-Jul-2007	Saltator coerulescens		Grayish Saltator		Museo Argentino de Ciencias Naturales	56.5 g	Saltator
BARG	KBARG040-07	MACN-Or-ct 295		MACN-Or 68927	694[1n]	2	0	Yes	FJ028226			23-Jun-2005	Saltator coerulescens		Grayish Saltator		Museo Argentino de Ciencias Naturales		Saltator
BARG	KBAR483-06	MACN-Or-ct 1364		MACN-Or 69628	694[0n]	2	0	Yes	FJ028229			26-Apr-2006	Saltator coerulescens		Grayish Saltator		Museo Argentino de Ciencias Naturales		Saltator
BARG	KBAR477-06	MACN-Or-ct 1350		MACN-Or 69617	694[0n]	2	0	Yes	FJ028228			25-Apr-2006	Saltator coerulescens		Grayish Saltator		Museo Argentino de Ciencias Naturales		Saltator
BARG	KAARG295-07	MACN-Or-ct 2397		MACN-Or 70486	694[1n]	2	0	Yes	FJ028233			09-Jul-2007	Saltator similis		Green-winged Saltator		Museo Argentino de Ciencias Naturales		Saltator
BARG	KBARG361-07	MACN-Or-ct 2895		MACN-Or 70751	694[0n]	2	0	Yes	FJ028231			11-Dec-2006	Saltator similis		Green-winged Saltator		Museo Argentino de Ciencias Naturales		Saltator
BARG	KBAR500-06	MACN-Or-ct 1407		MACN-Or 69651	694[0n]	2	0	Yes	FJ028232			27-Apr-2006	Saltator similis		Green-winged Saltator		Museo Argentino de Ciencias Naturales	Originally entered as "saltator coerulescens"	Saltator
BARG	KBARG185-07	MACN-Or-ct 1960	GSC 109	MACN-Or 69290	694[1n]	2	0	Yes	FJ028247			20-Oct-2006	Schiffornis virescens		Greenish Schiffornis		Museo Argentino de Ciencias Naturales		Schiffornis
BARG	KBARG412-07	MACN-Or-ct 2973		MACN-Or 70786	694[0n]	2	0	Yes	FJ028246			18-Dec-2006	Schiffornis virescens		Greenish Schiffornis		Museo Argentino de Ciencias Naturales		Schiffornis
BARG	KBARG388-07	MACN-Or-ct 2967		MACN-Or 69269	694[0n]	2	0	Yes	FJ028245			16-Dec-2006	Schiffornis virescens		Greenish Schiffornis		Museo Argentino de Ciencias Naturales		Schiffornis
BARG	KAARG293-07	MACN-Or-ct 2392		MACN-Or 70481	694[0n]	2	0	Yes	FJ028293			05-Jun-2007	Sittasomus griseicapillus		Olivaceous Woodcreeper		Museo Argentino de Ciencias Naturales		Sittasomus
BARG	KAARG593-07	MACN-Or-ct 3219		MACN-Or 70924	667[1n]	2	0	Yes	FJ028288			27-Jul-2007	Sittasomus griseicapillus		Olivaceous Woodcreeper		Museo Argentino de Ciencias Naturales	11.3 g	Sittasomus
BARG	KAARG556-07	MACN-Or-ct 3169		MACN-Or 70874	670[1n]	2	0	Yes	FJ028287			20-Jul-2007	Sittasomus griseicapillus		Olivaceous Woodcreeper		Museo Argentino de Ciencias Naturales	9.8 g	Sittasomus
BARG	KBARG099-07	MACN-Or-ct 1970	GSC 119	MACN-Or 70149	686[4n]	2	0	Yes	FJ028292			20-Oct-2006	Sittasomus griseicapillus		Olivaceous Woodcreeper		Museo Argentino de Ciencias Naturales		Sittasomus
BARG	KBAR086-06	MACN-Or-ct 908	MBR 6957	KUNHM 97209	694[0n]	2	0	Yes	FJ028291			12-Nov-2005	Sittasomus griseicapillus		Olivaceous Woodcreeper		University of Kansas, Natural History Museum		Sittasomus
BARG	KBAR085-06	MACN-Or-ct 907	MBR 6956		694[0n]	2	0	Yes	FJ028290			12-Nov-2005	Sittasomus griseicapillus		Olivaceous Woodcreeper		Cornell University, Museum of Vertebrates		Sittasomus
BARG	KBAR084-06	MACN-Or-ct 1124	MJA 201		694[0n]	2	0	Yes	FJ028289			11-Nov-2005	Sittasomus griseicapillus		Olivaceous Woodcreeper		Cornell University, Museum of Vertebrates		Sittasomus
BARG	KAARG372-07	MACN-Or-ct 3232		MACN-Or 70937	694[0n]	2	0	Yes	FJ028303			29-Jul-2007	Sporophila caerulescens		Double-collared Seedeater		Museo Argentino de Ciencias Naturales		Sporophila
BARG	KAARG368-07	MACN-Or-ct 3211		MACN-Or 70916	694[0n]	2	0	Yes	FJ028302			27-Jul-2007	Sporophila caerulescens		Double-collared Seedeater		Museo Argentino de Ciencias Naturales		Sporophila
BARG	KAARG366-07	MACN-Or-ct 3192		MACN-Or 70897	694[0n]	2	0	Yes	FJ028301			22-Jul-2007	Sporophila caerulescens		Double-collared Seedeater		Museo Argentino de Ciencias Naturales		Sporophila
BARG	KBAR578-06	MACN-Or-ct 1535		MACN-Or 69771	694[0n]	2	0	Yes	FJ028300			01-May-2006	Sporophila caerulescens		Double-collared Seedeater		Museo Argentino de Ciencias Naturales		Sporophila
BARG	KBAR527-06	MACN-Or-ct 1462		MACN-Or 69704	694[0n]	2	0	Yes	FJ028299			28-Apr-2006	Sporophila caerulescens		Double-collared Seedeater		Museo Argentino de Ciencias Naturales		Sporophila
BARG	KBAR481-06	MACN-Or-ct 1358		MACN-Or 69625	694[0n]	2	0	Yes	FJ028298			25-Apr-2006	Sporophila caerulescens		Double-collared Seedeater		Museo Argentino de Ciencias Naturales		Sporophila
BARG	KAARG382-07	MACN-Or-ct 3121		MACN-Or-ct 3121 (no voucher)	694[0n]	2	0	Yes	FJ028305				Sporophila cinnamomea		Chestnut Seedeater		Museo Argentino de Ciencias Naturales		Sporophila
BARG	KAARG383-07	MACN-Or-ct 3122		MACN-Or-ct 3122 (live bird)	694[2n]	2	0	Yes	FJ028304				Sporophila cinnamomea		Chestnut Seedeater		Museo Argentino de Ciencias Naturales		Sporophila
BARG	KAARG365-07	MACN-Or-ct 3185		MACN-Or 70890	694[0n]	2	0	Yes	FJ028310			22-Jul-2007	Sporophila collaris		Rusty-collared Seedeater		Museo Argentino de Ciencias Naturales		Sporophila
BARG	KAARG367-07	MACN-Or-ct 3202		MACN-Or 70907	694[1n]	2	0	Yes	FJ028307			24-Jul-2007	Sporophila collaris		Rusty-collared Seedeater		Museo Argentino de Ciencias Naturales		Sporophila
BARG	KBAR909-06	MACN-Or-ct 1683	MB 131	MACN-Or 69889	694[0n]	2	0	Yes	FJ028309			23-May-2006	Sporophila collaris		Rusty-collared Seedeater		Museo Argentino de Ciencias Naturales		Sporophila
BARG	KBAR911-06	MACN-Or-ct 1685	MB 133	MACN-Or 69891	694[0n]	2	0	Yes	FJ028308			23-May-2006	Sporophila collaris		Rusty-collared Seedeater		Museo Argentino de Ciencias Naturales		Sporophila
BARG	KBAR908-06	MACN-Or-ct 1682	MB 130	MACN-Or 69888	664[1n]	2	0	Yes	FJ028306			23-May-2006	Sporophila collaris		Rusty-collared Seedeater		Museo Argentino de Ciencias Naturales		Sporophila
BARG	KAARG387-07	MACN-Or-ct 3131		MACN-Or-ct 3131 (live bird)	694[0n]	2	0	Yes	FJ028311				Sporophila hypochroma		Gray-and-chestnut Seedeater		Museo Argentino de Ciencias Naturales		Sporophila
BARG	KAARG375-07	MACN-Or-ct 3272		MACN-Or 70977	694[0n]	2	0	Yes	FJ028315			02-Aug-2007	Sporophila hypoxantha		Tawny-bellied Seedeater		Museo Argentino de Ciencias Naturales		Sporophila
BARG	KAARG374-07	MACN-Or-ct 3253		MACN-Or 70958	694[0n]	2	0	Yes	FJ028314			13-Feb-2007	Sporophila hypoxantha		Tawny-bellied Seedeater		Museo Argentino de Ciencias Naturales		Sporophila
BARG	KAARG373-07	MACN-Or-ct 3252		MACN-Or 70957	694[0n]	2	0	Yes	FJ028313			22-Jan-2007	Sporophila hypoxantha		Tawny-bellied Seedeater		Museo Argentino de Ciencias Naturales		Sporophila
BARG	KAARG363-07	MACN-Or-ct 3073		MACN-Or 70846	694[2n]	2	0	Yes	FJ028312			10-Mar-2007	Sporophila hypoxantha		Tawny-bellied Seedeater		Museo Argentino de Ciencias Naturales	Suspected female	Sporophila
BARG	KAARG369-07	MACN-Or-ct 3212		MACN-Or 70917	694[1n]	2	0	Yes	FJ028316			27-Jul-2007	Sporophila leucoptera		White-bellied Seedeater		Museo Argentino de Ciencias Naturales		Sporophila
BARG	KAARG388-07	MACN-Or-ct 3372		MACN-Or 71052	694[0n]	2	0	Yes	FJ028318			14-Jan-2007	Sporophila palustris		Marsh Seedeater		Museo Argentino de Ciencias Naturales		Sporophila
BARG	KAARG380-07	MACN-Or-ct 3117		MACN-Or-ct 3117 (live bird)	694[0n]	2	0	Yes	FJ028317				Sporophila palustris		Marsh Seedeater		Museo Argentino de Ciencias Naturales		Sporophila
BARG	KAARG132-07	MACN-Or-ct 2086		MACN-Or 70176	694[1n]	2	0	Yes	FJ028320			14-Dec-2006	Sporophila ruficollis		Dark-throated Seedeater		Museo Argentino de Ciencias Naturales		Sporophila
BARG	KAARG386-07	MACN-Or-ct 3130		MACN-Or-ct 3130 (live bird)	694[0n]	2	0	Yes	FJ028321				Sporophila ruficollis		Dark-throated Seedeater		Museo Argentino de Ciencias Naturales		Sporophila
BARG	KAARG134-07	MACN-Or-ct 2088		MACN-Or 70178	677[0n]	2	0	Yes	FJ028319			20-Dec-2006	Sporophila ruficollis		Dark-throated Seedeater		Museo Argentino de Ciencias Naturales		Sporophila
BARG	KAARG516-07	MACN-Or-ct 3132		MACN-Or-pict 3132 (picture)	694[12n]	2	0	No	FJ028322				Sporophila zelichi		Narosky's Seedeater		Museo Argentino de Ciencias Naturales		Sporophila
BARG	KBARG369-07	MACN-Or-ct 2896		MACN-Or 70752	680[0n]	2	0	Yes	FJ028323			11-Dec-2006	Stephanoxis lalandi		Plovercrest		Museo Argentino de Ciencias Naturales		Stephanoxis
BARG	KAARG587-07	MACN-Or-ct 3208		MACN-Or 70913	689[2n]	2	0	Yes	FJ028351			27-Jul-2007	Synallaxis albescens		Pale-breasted Spinetail		Museo Argentino de Ciencias Naturales	11.2 g	Synallaxis
BARG	KBARG350-07	MACN-Or-ct 2817		MACN-Or 70711	694[0n]	2	0	Yes	FJ028350			18-Nov-2006	Synallaxis albescens		Pale-breasted Spinetail		Museo Argentino de Ciencias Naturales		Synallaxis
BARG	KBARG342-07	MACN-Or-ct 2810	MBR 7118		694[0n]	2	0	Yes	FJ028349			18-Nov-2006	Synallaxis albescens		Pale-breasted Spinetail		University of Kansas, Natural History Museum		Synallaxis
BARG	KBAR813-06	MACN-Or-ct 1556	MB 04	MACN-Or 69789	694[0n]	2	0	Yes	FJ028354			02-May-2006	Synallaxis albescens		Pale-breasted Spinetail		Museo Argentino de Ciencias Naturales		Synallaxis
BARG	KBAR546-06	MACN-Or-ct 1492		MACN-Or 69734	694[0n]	2	0	Yes	FJ028353			29-Apr-2006	Synallaxis albescens		Pale-breasted Spinetail		Museo Argentino de Ciencias Naturales		Synallaxis
BARG	KBAR910-06	MACN-Or-ct 1684	MB 132	MACN-Or 69890	694[0n]	2	0	Yes	FJ028352			23-May-2006	Synallaxis albescens		Pale-breasted Spinetail		Museo Argentino de Ciencias Naturales		Synallaxis
BARG	KBAR074-06	MACN-Or-ct 996	KSB 627		694[0n]	2	0	Yes	FJ028357			29-Oct-2005	Synallaxis azarae		Azara's Spinetail		Cornell University, Museum of Vertebrates		Synallaxis
BARG	KBAR072-06	MACN-Or-ct 739	MBR 6876	MACN-Or 69077	694[0n]	2	0	Yes	FJ028356			25-Oct-2005	Synallaxis azarae		Azara's Spinetail		Museo Argentino de Ciencias Naturales		Synallaxis
BARG	KBAR073-06	MACN-Or-ct 760	MDE 135	KUNHM 97224	694[0n]	2	0	Yes	FJ028355			27-Oct-2005	Synallaxis azarae		Azara's Spinetail		University of Kansas, Natural History Museum		Synallaxis
BARG	KAARG423-07	MACN-Or-cp 39		MACN-Or 67294	694[0n]	2	0	Yes	FJ028360			26-Jan-1998	Synallaxis frontalis		Sooty-fronted Spinetail		Museo Argentino de Ciencias Naturales		Synallaxis
BARG	KAARG571-07	MACN-Or-ct 3187		MACN-Or 70892	664[0n]	2	0	Yes	FJ028359			22-Jul-2007	Synallaxis frontalis	A	Sooty-fronted Spinetail		Museo Argentino de Ciencias Naturales		Synallaxis
BARG	KBAR866-06	MACN-Or-ct 1629	MB 77	MACN-Or 69840	694[0n]	2	0	Yes	FJ028361			10-May-2006	Synallaxis frontalis		Sooty-fronted Spinetail		Museo Argentino de Ciencias Naturales		Synallaxis
BARG	KBAR522-06	MACN-Or-ct 1450		MACN-Or 69692	694[1n]	2	0	Yes	FJ028358			28-Apr-2006	Synallaxis frontalis		Sooty-fronted Spinetail		Museo Argentino de Ciencias Naturales		Synallaxis
BARG	KAARG247-07	MACN-Or-ct 2280		MACN-Or 70369	694[0n]	2	0	Yes	FJ028363			01-Jan-2004	Synallaxis spixi		Chicli Spinetail		Museo Argentino de Ciencias Naturales		Synallaxis
BARG	KAARG246-07	MACN-Or-ct 2279		MACN-Or 70368	663[3n]	2	0	Yes	FJ028362			01-Jan-2004	Synallaxis spixi		Chicli Spinetail		Museo Argentino de Ciencias Naturales		Synallaxis
BARG	KBARG155-07	MACN-Or-ct 1990	GSC 139	MACN-Or 71866	694[1n]	2	0	Yes	FJ028364			20-Oct-2006	Syndactyla rufosuperciliata		Buff-browed Foliage-gleaner		Museo Argentino de Ciencias Naturales		Syndactyla
BARG	KBAR889-06	MACN-Or-ct 1659	MB 107	MACN-Or 69867	694[0n]	2	0	Yes	FJ028368			18-May-2006	Syndactyla rufosuperciliata		Buff-browed Foliage-gleaner		Museo Argentino de Ciencias Naturales		Syndactyla
BARG	KBAR330-06	MACN-Or-ct 894	MDE 213	KUNHM 96947	694[0n]	2	0	Yes	FJ028367			11-Nov-2005	Syndactyla rufosuperciliata		Buff-browed Foliage-gleaner		University of Kansas, Natural History Museum		Syndactyla
BARG	KBAR075-06	MACN-Or-ct 1116	MJA 198		694[0n]	2	0	Yes	FJ028366			11-Nov-2005	Syndactyla rufosuperciliata		Buff-browed Foliage-gleaner		Cornell University, Museum of Vertebrates		Syndactyla
BARG	KBAR077-06	MACN-Or-ct 724	MDE 118	KUNHM 96850	694[0n]	2	0	Yes	FJ028365			24-Oct-2005	Syndactyla rufosuperciliata		Buff-browed Foliage-gleaner		University of Kansas, Natural History Museum		Syndactyla
BARG	KBARG119-07	MACN-Or-ct 1840		MACN-Or 70042	694[0n]	2	0	Yes	FJ028376			20-Oct-2006	Tachycineta leucorrhoa		White-rumped Swallow		Museo Argentino de Ciencias Naturales		Tachycineta
BARG	KBAR560-06	MACN-Or-ct 1513		MACN-Or 69753	694[0n]	2	0	Yes	FJ028378			29-Apr-2006	Tachycineta leucorrhoa		White-rumped Swallow		Museo Argentino de Ciencias Naturales		Tachycineta
BARG	KBAR559-06	MACN-Or-ct 1512		MACN-Or 69752	694[0n]	2	0	Yes	FJ028377			29-Apr-2006	Tachycineta leucorrhoa		White-rumped Swallow		Museo Argentino de Ciencias Naturales		Tachycineta
BARG	KAARG031-07	MACN-Or-ct 287		MACN-Or 68938	694[5n]	2	0	Yes	FJ028381			16-Jan-2005	Tachycineta meyeni		Chilean Swallow		Museo Argentino de Ciencias Naturales		Tachycineta
BARG	KBARG261-07	MACN-Or-ct 2684	MBR 7068		694[0n]	2	0	Yes	FJ028380			08-Nov-2006	Tachycineta meyeni		Chilean Swallow		University of Kansas, Natural History Museum		Tachycineta
BARG	KBARG253-07	MACN-Or-ct 2683	MDE 295		694[0n]	2	0	Yes	FJ028379			08-Nov-2006	Tachycineta meyeni		Chilean Swallow		University of Kansas, Natural History Museum		Tachycineta
BARG	KBAR440-06	MACN-Or-ct 639	GFB 3458		694[0n]	2	0	Yes	FJ028382			20-Jan-2005	Tachycineta meyeni		Chilean Swallow		American Museum of Natural History	Tachycineta leucorrhoa (leucopyga)	Tachycineta
BARG	KBARG283-07	MACN-Or-ct 2864		MACN-Or 69231	694[1n]	2	0	Yes	FJ028384			09-Dec-2006	Tachyphonus coronatus		Ruby-crowned Tanager		Museo Argentino de Ciencias Naturales		Tachyphonus
BARG	KBARG170-07	MACN-Or-ct 1952	GSC 101	MACN-Or 69294	694[1n]	2	0	Yes	FJ028383			20-Oct-2006	Tachyphonus coronatus		Ruby-crowned Tanager		Museo Argentino de Ciencias Naturales		Tachyphonus
BARG	KAARG542-07	MACN-Or-ct 3147		MACN-Or 70852	672[1n]	2	0	Yes	FJ028386			18-Jul-2007	Tachyphonus rufus		White-lined Tanager		Museo Argentino de Ciencias Naturales	31.6 g	Tachyphonus
BARG	KAARG599-07	MACN-Or-ct 3227		MACN-Or 70932	652[0n]	2	0	Yes	FJ028389			28-Jul-2007	Tachyphonus rufus		White-lined Tanager		Museo Argentino de Ciencias Naturales	29.2 g	Tachyphonus
BARG	KBAR856-06	MACN-Or-ct 1617	MB 65	MACN-Or 69830	694[0n]	2	0	Yes	FJ028388			08-May-2006	Tachyphonus rufus		White-lined Tanager		Museo Argentino de Ciencias Naturales		Tachyphonus
BARG	KBAR562-06	MACN-Or-ct 1515		MACN-Or 69755	694[0n]	2	0	Yes	FJ028387			30-Apr-2006	Tachyphonus rufus		White-lined Tanager		Museo Argentino de Ciencias Naturales		Tachyphonus
BARG	KBAR927-06	MACN-Or-ct 1703	MB 151	MACN-Or 69907	694[1n]	2	0	Yes	FJ028385			29-May-2006	Tachyphonus rufus		White-lined Tanager		Museo Argentino de Ciencias Naturales		Tachyphonus
BARG	KAARG269-07	MACN-Or-ct 2357		MACN-Or 70446	694[0n]	2	0	Yes	FJ028392			15-Feb-2007	Tapera naevia	I	Striped Cuckoo		Museo Argentino de Ciencias Naturales		Tapera
BARG	KBARG145-07	MACN-Or-ct 1878		MACN-Or 70077	694[0n]	2	0	Yes	FJ028391			02-Nov-2006	Tapera naevia		Striped Cuckoo		Museo Argentino de Ciencias Naturales		Tapera
BARG	KBARG137-07	MACN-Or-ct 1877		MACN-Or 70076	694[1n]	2	0	Yes	FJ028390			02-Nov-2006	Tapera naevia		Striped Cuckoo		Museo Argentino de Ciencias Naturales		Tapera
BARG	KBAR489-06	MACN-Or-ct 1380		MACN-Or 69342	694[0n]	2	0	Yes	FJ028393			26-Apr-2006	Tapera naevia		Striped Cuckoo		Museo Argentino de Ciencias Naturales		Tapera
BARG	KAARG598-07	MACN-Or-ct 3226		MACN-Or 70931	649[5n]	2	0	Yes	FJ028396			28-Jul-2007	Taraba major		Great Antshrike		Museo Argentino de Ciencias Naturales	51.6 g	Taraba
BARG	KAARG547-07	MACN-Or-ct 3156		MACN-Or 70861	669[0n]	2	0	Yes	FJ028395			19-Jul-2007	Taraba major	A	Great Antshrike		Museo Argentino de Ciencias Naturales	49.5 g	Taraba
BARG	KAARG584-07	MACN-Or-ct 3203		MACN-Or 70908	670[0n]	2	0	Yes	FJ028394			24-Jul-2007	Taraba major		Great Antshrike		Museo Argentino de Ciencias Naturales	50.3 g	Taraba
BARG	KBARG344-07	MACN-Or-ct 2907		MACN-Or 70759	694[0n]	2	0	Yes	FJ028403			11-Dec-2006	Thalurania glaucopis		Violet-capped Woodnymph		Museo Argentino de Ciencias Naturales		Thalurania
BARG	KBARG321-07	MACN-Or-ct 2889		MACN-Or 69261	694[0n]	2	0	Yes	FJ028402			10-Dec-2006	Thalurania glaucopis		Violet-capped Woodnymph		Museo Argentino de Ciencias Naturales		Thalurania
BARG	KBARG362-07	MACN-Or-ct 2881		MACN-Or 70743	669[1n]	2	0	Yes	FJ028404			10-Dec-2006	Thalurania glaucopis	I	Violet-capped Woodnymph		Museo Argentino de Ciencias Naturales		Thalurania
BARG	KAARG617-07	MACN-Or-ct 3251		MACN-Or 70956	628[0n]	2	0	Yes	FJ028411			01-Aug-2007	Thamnophilus caerulescens		Variable Antshrike		Museo Argentino de Ciencias Naturales	18.4 g	Thamnophilus
BARG	KAARG557-07	MACN-Or-ct 3170		MACN-Or 70875	666[0n]	2	0	Yes	FJ028408			20-Jul-2007	Thamnophilus caerulescens		Variable Antshrike		Museo Argentino de Ciencias Naturales	17.1 g	Thamnophilus
BARG	KBAR092-06	MACN-Or-ct 892	MDE 212	KUNHM 96948	694[0n]	2	0	Yes	FJ028407			11-Nov-2005	Thamnophilus caerulescens		Variable Antshrike		University of Kansas, Natural History Museum		Thamnophilus
BARG	KBAR091-06	MACN-Or-ct 1128	MJA 202		694[0n]	2	0	Yes	FJ028406			12-Nov-2005	Thamnophilus caerulescens		Variable Antshrike		Cornell University, Museum of Vertebrates		Thamnophilus
BARG	KBAR867-06	MACN-Or-ct 1630	MB 78	MACN-Or 69841	694[0n]	2	0	Yes	FJ028410			10-May-2006	Thamnophilus caerulescens		Variable Antshrike		Museo Argentino de Ciencias Naturales		Thamnophilus
BARG	KBAR779-06	MACN-Or-ct 1425		MACN-Or 69669	694[0n]	2	0	Yes	FJ028409			27-Apr-2006	Thamnophilus caerulescens		Variable Antshrike		Museo Argentino de Ciencias Naturales		Thamnophilus
BARG	KBAR767-06	MACN-Or-ct 1387		MACN-Or 69349	694[0n]	2	0	Yes	FJ028405			26-Apr-2006	Thamnophilus caerulescens		Variable Antshrike		Museo Argentino de Ciencias Naturales		Thamnophilus
BARG	KAARG216-07	MACN-Or-ct 2188		MACN-Or 70277	676[0n]	2	0	Yes	FJ028415			15-Jun-2007	Thamnophilus ruficapillus		Rufous-capped Antshrike		Museo Argentino de Ciencias Naturales		Thamnophilus
BARG	KAARG155-07	MACN-Or-ct 2121		MACN-Or 70210	694[2n]	2	0	Yes	FJ028414			09-May-2007	Thamnophilus ruficapillus		Rufous-capped Antshrike		Museo Argentino de Ciencias Naturales		Thamnophilus
BARG	KBAR094-06	MACN-Or-ct 885	MBR 6947	KUNHM 96949	694[0n]	2	0	Yes	FJ028413			11-Nov-2005	Thamnophilus ruficapillus		Rufous-capped Antshrike		University of Kansas, Natural History Museum		Thamnophilus
BARG	KBAR093-06	MACN-Or-ct 1132	KSB 680		681[0n]	2	0	Yes	FJ028412			12-Nov-2005	Thamnophilus ruficapillus		Rufous-capped Antshrike		Cornell University, Museum of Vertebrates		Thamnophilus
BARG	KAARG310-07	MACN-Or-ct 2816	ASB 085		694[0n]	2	0	Yes	FJ028436			18-Nov-2006	Thraupis bonariensis		Blue-and-yellow Tanager		University of Kansas, Natural History Museum		Thraupis
BARG	KAARG309-07	MACN-Or-ct 2815	MDE 345		691[0n]	2	0	Yes	FJ028433			18-Nov-2006	Thraupis bonariensis		Blue-and-yellow Tanager		University of Kansas, Natural History Museum		Thraupis
BARG	KBAR597-06	MACN-Or-ct 001		MACN-Or 68467	694[0n]	2	0	Yes	FJ028432			07-Nov-2003	Thraupis bonariensis		Blue-and-yellow Tanager		Museo Argentino de Ciencias Naturales		Thraupis
BARG	KBAR290-06	MACN-Or-ct 871	MDE 200		694[0n]	2	0	Yes	FJ028431			09-Nov-2005	Thraupis bonariensis		Blue-and-yellow Tanager		Cornell University, Museum of Vertebrates		Thraupis
BARG	KBAR289-06	MACN-Or-ct 1106	ASB 029	MACN-Or 69200	694[0n]	2	0	Yes	FJ028430			09-Nov-2005	Thraupis bonariensis		Blue-and-yellow Tanager		Museo Argentino de Ciencias Naturales		Thraupis
BARG	KBARG209-07	MACN-Or-ct 2753		MACN-Or 70681	676[0n]	2	0	Yes	FJ028435			15-Nov-2006	Thraupis bonariensis		Blue-and-yellow Tanager		Museo Argentino de Ciencias Naturales		Thraupis
BARG	KBARG039-07	MACN-Or-ct 1726		MACN-Or 69929	694[3n]	2	0	Yes	FJ028434			13-Sep-2006	Thraupis bonariensis		Blue-and-yellow Tanager		Museo Argentino de Ciencias Naturales		Thraupis
BARG	KAARG095-07	MACN-Or-ct 1918		MACN-Or 70117	694[2n]	2	0	Yes	FJ028441			01-Jan-2006	Thraupis sayaca		Sayaca Tanager		Museo Argentino de Ciencias Naturales	Suspected female	Thraupis
BARG	KBARG015-07	MACN-Or-ct 1727		MACN-Or 69930	694[0n]	2	0	Yes	FJ028440			13-Sep-2006	Thraupis sayaca		Sayaca Tanager		Museo Argentino de Ciencias Naturales		Thraupis
BARG	KBAR770-06	MACN-Or-ct 1394		MACN-Or 69640	694[0n]	2	0	Yes	FJ028439			26-Apr-2006	Thraupis sayaca		Sayaca Tanager		Museo Argentino de Ciencias Naturales		Thraupis
BARG	KBAR626-06	MACN-Or-ct 361	SCL06-019	MACN-Or 69004	694[0n]	2	0	Yes	FJ028438			23-Jan-2006	Thraupis sayaca		Sayaca Tanager		Museo Argentino de Ciencias Naturales		Thraupis
BARG	KBAR291-06	MACN-Or-ct 1159	ASB 037	MACN-Or 69199	694[0n]	2	0	Yes	FJ028437			13-Nov-2005	Thraupis sayaca		Sayaca Tanager		Museo Argentino de Ciencias Naturales		Thraupis
BARG	KBAR881-06	MACN-Or-ct 1649	MB 97	MACN-Or 69859	694[0n]	2	0	Yes	FJ028443			15-May-2006	Tigrisoma lineatum		Rufescent Tiger-Heron		Museo Argentino de Ciencias Naturales		Tigrisoma
BARG	KBAR863-06	MACN-Or-ct 1625	MB 73	MACN-Or 69837	679[0n]	4	0	Yes	FJ028442			09-May-2006	Tigrisoma lineatum		Rufescent Tiger-Heron		Museo Argentino de Ciencias Naturales		Tigrisoma
BARG	KBARG324-07	MACN-Or-ct 2843		MACN-Or 70729	694[0n]	2	0	Yes	FJ028450			07-Dec-2006	Trichothraupis melanops		Black-goggled Tanager		Museo Argentino de Ciencias Naturales		Trichothraupis
BARG	KBARG284-07	MACN-Or-ct 2851		MACN-Or 69233	694[0n]	2	0	Yes	FJ028449			08-Dec-2006	Trichothraupis melanops		Black-goggled Tanager		Museo Argentino de Ciencias Naturales		Trichothraupis
BARG	KBARG177-07	MACN-Or-ct 1953	GSC 102	MACN-Or 69293	693[0n]	2	0	Yes	FJ028451			20-Oct-2006	Trichothraupis melanops		Black-goggled Tanager		Museo Argentino de Ciencias Naturales		Trichothraupis
BARG	KAARG299-07	MACN-Or-ct 2599		MACN-Or 70605	694[0n]	2	0	Yes	FJ028475			31-Oct-2006	Troglodytes aedon		House Wren		Museo Argentino de Ciencias Naturales		Troglodytes
BARG	KAARG082-07	MACN-Or-ct 1903		MACN-Or 70102	694[1n]	2	0	Yes	FJ028474			22-Nov-2006	Troglodytes aedon		House Wren		Museo Argentino de Ciencias Naturales		Troglodytes
BARG	KAARG076-07	MACN-Or-ct 1895		MACN-Or 70094	694[1n]	2	0	Yes	FJ028473			01-Feb-2007	Troglodytes aedon		House Wren		Museo Argentino de Ciencias Naturales		Troglodytes
BARG	KAARG578-07	MACN-Or-ct 3196		MACN-Or 70901	675[2n]	2	0	Yes	FJ028472			23-Jul-2007	Troglodytes aedon		House Wren		Museo Argentino de Ciencias Naturales	10.4 g	Troglodytes
BARG	KAARG261-07	MACN-Or-ct 2333		MACN-Or 70422	691[1n]	2	0	Yes	FJ028470			30-Dec-2006	Troglodytes aedon		House Wren		Museo Argentino de Ciencias Naturales		Troglodytes
BARG	KAARG081-07	MACN-Or-ct 1902		MACN-Or 70101	694[2n]	2	0	Yes	FJ028469			22-Nov-2006	Troglodytes aedon		House Wren		Museo Argentino de Ciencias Naturales		Troglodytes
BARG	KBARG348-07	MACN-Or-ct 2846		MACN-Or 70731	694[0n]	2	0	Yes	FJ028468			07-Dec-2006	Troglodytes aedon		House Wren		Museo Argentino de Ciencias Naturales		Troglodytes
BARG	KBARG345-07	MACN-Or-ct 2893		MACN-Or 70750	694[0n]	2	0	Yes	FJ028467			11-Dec-2006	Troglodytes aedon		House Wren		Museo Argentino de Ciencias Naturales		Troglodytes
BARG	KBARG268-07	MACN-Or-ct 2666		MACN-Or 70639	694[0n]	2	0	Yes	FJ028466			05-Nov-2006	Troglodytes aedon		House Wren		Museo Argentino de Ciencias Naturales		Troglodytes
BARG	KBARG229-07	MACN-Or-ct 2680	MBR 7067		694[0n]	2	0	Yes	FJ028465			08-Nov-2006	Troglodytes aedon		House Wren		University of Kansas, Natural History Museum		Troglodytes
BARG	KBARG221-07	MACN-Or-ct 2679	MDE 294		694[0n]	2	0	Yes	FJ028464			08-Nov-2006	Troglodytes aedon		House Wren		University of Kansas, Natural History Museum		Troglodytes
BARG	KBARG073-07	MACN-Or-ct 286		MACN-Or 68937	694[0n]	2	0	Yes	FJ028463			01-Feb-2005	Troglodytes aedon		House Wren		Museo Argentino de Ciencias Naturales		Troglodytes
BARG	KAARG555-07	MACN-Or-ct 3168		MACN-Or 70873	644[0n]	2	0	Yes	FJ028476			20-Jul-2007	Troglodytes aedon		House Wren		Museo Argentino de Ciencias Naturales	11.1 g	Troglodytes
BARG	KBAR794-06	MACN-Or-ct 1475		MACN-Or 69717	694[0n]	2	0	Yes	FJ028462			29-Apr-2006	Troglodytes aedon		House Wren		Museo Argentino de Ciencias Naturales		Troglodytes
BARG	KBAR610-06	MACN-Or-ct 055		MACN-Or 68466	694[0n]	2	0	Yes	FJ028461			12-Nov-2003	Troglodytes aedon		House Wren		Museo Argentino de Ciencias Naturales		Troglodytes
BARG	KBAR181-06	MACN-Or-ct 599	PRS 2899		694[0n]	2	0	Yes	FJ028460			25-Jan-2005	Troglodytes aedon		House Wren		American Museum of Natural History		Troglodytes
BARG	KBAR182-06	MACN-Or-ct 695	GFB 3514	MACN-Or 68736	694[0n]	2	0	Yes	FJ028459			25-Jan-2005	Troglodytes aedon		House Wren		Museo Argentino de Ciencias Naturales		Troglodytes
BARG	KBARG136-07	MACN-Or-ct 1860		MACN-Or 70060	694[4n]	2	0	Yes	FJ028471			25-Oct-2006	Troglodytes aedon		House Wren		Museo Argentino de Ciencias Naturales		Troglodytes
BARG	KBAR180-06	MACN-Or-ct 1016	MJA 164	MACN-Or 69128	694[1n]	2	0	Yes	FJ028458			03-Nov-2005	Troglodytes aedon		House Wren		Museo Argentino de Ciencias Naturales		Troglodytes
BARG	KBAR185-06	MACN-Or-ct 785	MBR 6896	KUNHM 96835	694[0n]	2	0	Yes	FJ028479			28-Oct-2005	Troglodytes solstitialis		Mountain Wren		University of Kansas, Natural History Museum		Troglodytes
BARG	KBAR184-06	MACN-Or-ct 778	MDE 147	MACN-Or 69013	677[0n]	1	0	No	FJ028478			28-Oct-2005	Troglodytes solstitialis		Mountain Wren		Museo Argentino de Ciencias Naturales		Troglodytes
BARG	KBAR183-06	MACN-Or-ct 765	MDE 140	KUNHM 96836	694[1n]	2	0	Yes	FJ028477			27-Oct-2005	Troglodytes solstitialis		Mountain Wren		University of Kansas, Natural History Museum		Troglodytes
BARG	KBARG340-07	MACN-Or-ct 2845		MACN-Or 69244	694[0n]	2	0	Yes	FJ028480			07-Dec-2006	Trogon rufus	I	Black-throated Trogon		Museo Argentino de Ciencias Naturales		Trogon
BARG	KBARG382-07	MACN-Or-ct 2934		MACN-Or 70776	694[0n]	2	0	Yes	FJ028485			13-Dec-2006	Trogon surrucura		Surucua Trogon		Museo Argentino de Ciencias Naturales		Trogon
BARG	KBARG376-07	MACN-Or-ct 2946		MACN-Or 69245	694[0n]	2	0	Yes	FJ028484			14-Dec-2006	Trogon surrucura		Surucua Trogon		Museo Argentino de Ciencias Naturales		Trogon
BARG	KBAR872-06	MACN-Or-ct 1637	MB 85	MACN-Or 69847	694[0n]	2	0	Yes	FJ028483			12-May-2006	Trogon surrucura		Surucua Trogon		Museo Argentino de Ciencias Naturales		Trogon
BARG	KBAR871-06	MACN-Or-ct 1636	MB 84	MACN-Or 69846	694[0n]	2	0	Yes	FJ028482			12-May-2006	Trogon surrucura		Surucua Trogon		Museo Argentino de Ciencias Naturales		Trogon
BARG	KBAR929-06	MACN-Or-ct 1705	MB 153	MACN-Or 69909	694[0n]	2	0	Yes	FJ028481			30-May-2006	Trogon surrucura		Surucua Trogon		Museo Argentino de Ciencias Naturales		Trogon
BARG	KBARG392-07	MACN-Or-ct 2968		MACN-Or 69254	694[0n]	2	0	Yes	FJ028487			16-Dec-2006	Turdus albicollis		White-necked Thrush		Museo Argentino de Ciencias Naturales		Turdus
BARG	KBARG332-07	MACN-Or-ct 2844		MACN-Or 70730	694[0n]	2	0	Yes	FJ028486			07-Dec-2006	Turdus albicollis		White-necked Thrush		Museo Argentino de Ciencias Naturales		Turdus
BARG	KBARG352-07	MACN-Or-ct 2909		MACN-Or 70761	691[0n]	2	0	Yes	FJ028488			12-Dec-2006	Turdus albicollis		White-necked Thrush		Museo Argentino de Ciencias Naturales		Turdus
BARG	KAARG290-07	MACN-Or-ct 2387		MACN-Or 70476	694[0n]	2	0	Yes	FJ028498			02-Jun-2007	Turdus amaurochalinus		Creamy-bellied Thrush		Museo Argentino de Ciencias Naturales		Turdus
BARG	KAARG047-07	MACN-Or-ct 366		MACN-Or 69529	694[1n]	2	0	Yes	FJ028497			01-Dec-2004	Turdus amaurochalinus		Creamy-bellied Thrush		Museo Argentino de Ciencias Naturales		Turdus
BARG	KAARG574-07	MACN-Or-ct 3190		MACN-Or 70895	684[0n]	2	0	Yes	FJ028496			22-Jul-2007	Turdus amaurochalinus		Creamy-bellied Thrush		Museo Argentino de Ciencias Naturales	59.9 g	Turdus
BARG	KAARG203-07	MACN-Or-ct 2173		MACN-Or 70262	693[1n]	2	0	Yes	FJ028495			13-Jun-2007	Turdus amaurochalinus		Creamy-bellied Thrush		Museo Argentino de Ciencias Naturales		Turdus
BARG	KAARG089-07	MACN-Or-ct 1910		MACN-Or 70109	694[2n]	2	0	Yes	FJ028494			23-Nov-2006	Turdus amaurochalinus		Creamy-bellied Thrush		Museo Argentino de Ciencias Naturales		Turdus
BARG	KBAR807-06	MACN-Or-ct 1537		MACN-Or 69772	694[0n]	2	0	Yes	FJ028493			01-May-2006	Turdus amaurochalinus		Creamy-bellied Thrush		Museo Argentino de Ciencias Naturales		Turdus
BARG	KBAR772-06	MACN-Or-ct 1398		MACN-Or 69642	694[0n]	2	0	Yes	FJ028492			27-Apr-2006	Turdus amaurochalinus		Creamy-bellied Thrush		Museo Argentino de Ciencias Naturales		Turdus
BARG	KBAR195-06	MACN-Or-ct 975	FBG 004	KUNHM 96829	694[0n]	2	0	Yes	FJ028491			28-Oct-2005	Turdus amaurochalinus		Creamy-bellied Thrush		University of Kansas, Natural History Museum		Turdus
BARG	KBAR194-06	MACN-Or-ct 938	MJA 120		694[0n]	2	0	Yes	FJ028490			24-Oct-2005	Turdus amaurochalinus		Creamy-bellied Thrush		Cornell University, Museum of Vertebrates		Turdus
BARG	KBAR193-06	MACN-Or-ct 923	ASB 001	MACN-Or 69104	694[0n]	2	0	Yes	FJ028489			23-Oct-2005	Turdus amaurochalinus		Creamy-bellied Thrush		Museo Argentino de Ciencias Naturales		Turdus
BARG	KBAR314-06	MACN-Or-ct 798	MDE 161	KUNHM 97228	694[0n]	2	0	Yes	FJ028501			03-Nov-2005	Turdus chiguanco		Chiguanco Thrush		University of Kansas, Natural History Museum		Turdus
BARG	KBAR196-06	MACN-Or-ct 1056	MJA 178		694[0n]	2	0	Yes	FJ028500			05-Nov-2005	Turdus chiguanco		Chiguanco Thrush		Cornell University, Museum of Vertebrates		Turdus
BARG	KBAR198-06	MACN-Or-ct 726	MDE 119	KUNHM 96830	694[0n]	2	0	Yes	FJ028499			24-Oct-2005	Turdus chiguanco		Chiguanco Thrush		University of Kansas, Natural History Museum		Turdus
BARG	KBARG212-07	MACN-Or-ct 2626		MACN-Or 70619	694[0n]	2	0	Yes	FJ028504			02-Nov-2006	Turdus falcklandii		Austral Thrush		Museo Argentino de Ciencias Naturales		Turdus
BARG	KBAR428-06	MACN-Or-ct 543	PRS 2842		694[0n]	2	0	Yes	FJ028503			20-Jan-2005	Turdus falcklandii		Austral Thrush		American Museum of Natural History		Turdus
BARG	KBAR427-06	MACN-Or-ct 540	PRS 2839		694[0n]	2	0	Yes	FJ028502			19-Jan-2005	Turdus falcklandii		Austral Thrush		American Museum of Natural History		Turdus
BARG	KBARG149-07	MACN-Or-ct 2579		MACN-Or 70593	633[0n]	2	0	Yes	FJ028505			30-Oct-2006	Turdus falcklandii		Austral Thrush		Museo Argentino de Ciencias Naturales		Turdus
BARG	KBARG364-07	MACN-Or-ct 2848		MACN-Or 69252	694[0n]	2	0	Yes	FJ028508			07-Dec-2006	Turdus leucomelas		Pale-breasted Thrush		Museo Argentino de Ciencias Naturales		Turdus
BARG	KBARG338-07	MACN-Or-ct 2872		MACN-Or 70741	694[0n]	2	0	Yes	FJ028507			10-Dec-2006	Turdus leucomelas		Pale-breasted Thrush		Museo Argentino de Ciencias Naturales		Turdus
BARG	KBARG304-07	MACN-Or-ct 2902		MACN-Or 70756	694[0n]	2	0	Yes	FJ028506			11-Dec-2006	Turdus leucomelas		Pale-breasted Thrush		Museo Argentino de Ciencias Naturales		Turdus
BARG	KBAR199-06	MACN-Or-ct 960	FBG 002	MACN-Or 69105	671[0n]	2	0	Yes	FJ028509			26-Oct-2005	Turdus nigriceps		Andean Slaty-Thrush		Museo Argentino de Ciencias Naturales		Turdus
BARG	KAARG079-07	MACN-Or-ct 1899		MACN-Or 70098	694[0n]	2	0	Yes	FJ028520			01-Feb-2007	Turdus rufiventris		Rufous-bellied Thrush		Museo Argentino de Ciencias Naturales		Turdus
BARG	KAARG071-07	MACN-Or-ct 1890		MACN-Or 70089	680[1n]	2	0	Yes	FJ028519			11-Dec-2006	Turdus rufiventris		Rufous-bellied Thrush		Museo Argentino de Ciencias Naturales		Turdus
BARG	KAARG610-07	MACN-Or-ct 3241		MACN-Or 70946	690[0n]	2	0	Yes	FJ028518			30-Jul-2007	Turdus rufiventris		Rufous-bellied Thrush		Museo Argentino de Ciencias Naturales	64.6 g	Turdus
BARG	KBARG330-07	MACN-Or-ct 2871		MACN-Or 70740	694[0n]	2	0	Yes	FJ028517			09-Dec-2006	Turdus rufiventris		Rufous-bellied Thrush		Museo Argentino de Ciencias Naturales		Turdus
BARG	KBARG314-07	MACN-Or-ct 2869		MACN-Or 69253	694[0n]	2	0	Yes	FJ028516			09-Dec-2006	Turdus rufiventris		Rufous-bellied Thrush		Museo Argentino de Ciencias Naturales		Turdus
BARG	KAARG550-07	MACN-Or-ct 3161		MACN-Or 70866	666[0n]	2	0	Yes	FJ028515			20-Jul-2007	Turdus rufiventris		Rufous-bellied Thrush		Museo Argentino de Ciencias Naturales	64.5 g	Turdus
BARG	KBAR780-06	MACN-Or-ct 1428		MACN-Or 69672	694[0n]	2	0	Yes	FJ028514			27-Apr-2006	Turdus rufiventris		Rufous-bellied Thrush		Museo Argentino de Ciencias Naturales		Turdus
BARG	KBAR331-06	MACN-Or-ct 895	MDE 214	KUNHM 96933	694[0n]	2	0	Yes	FJ028513			12-Nov-2005	Turdus rufiventris		Rufous-bellied Thrush		University of Kansas, Natural History Museum		Turdus
BARG	KBAR621-06	MACN-Or-ct 270		MACN-Or 68962	694[0n]	2	0	Yes	FJ028512			26-Sep-2005	Turdus rufiventris		Rufous-bellied Thrush		Museo Argentino de Ciencias Naturales		Turdus
BARG	KBAR351-06	MACN-Or-ct 1154	KSB 684		685[0n]	2	0	Yes	FJ028511			13-Nov-2005	Turdus rufiventris		Rufous-bellied Thrush		Cornell University, Museum of Vertebrates		Turdus
BARG	KBAR202-06	MACN-Or-ct 1127	PB 030	MACN-Or 69191	694[1n]	2	0	Yes	FJ028510			12-Nov-2005	Turdus rufiventris		Rufous-bellied Thrush		Museo Argentino de Ciencias Naturales		Turdus
BARG	KBARG062-07	MACN-Or-ct 1763		MACN-Or 69966	694[0n]	2	0	Yes	FJ028525			21-Sep-2006	Tyrannus melancholicus		Tropical Kingbird		Museo Argentino de Ciencias Naturales		Tyrannus
BARG	KBARG001-07	MACN-Or-ct 1774		MACN-Or 69977	694[0n]	2	0	Yes	FJ028524			25-Sep-2006	Tyrannus melancholicus		Tropical Kingbird		Museo Argentino de Ciencias Naturales		Tyrannus
BARG	KBAR335-06	MACN-Or-ct 906	MDE 220	KUNHM 96941	694[0n]	2	0	Yes	FJ028523			12-Nov-2005	Tyrannus melancholicus		Tropical Kingbird		University of Kansas, Natural History Museum		Tyrannus
BARG	KBAR175-06	MACN-Or-ct 891	MDE 211	KUNHM 96940	694[0n]	2	0	Yes	FJ028522			11-Nov-2005	Tyrannus melancholicus		Tropical Kingbird		University of Kansas, Natural History Museum		Tyrannus
BARG	KBAR173-06	MACN-Or-ct 1125	KSB 676		694[0n]	2	0	Yes	FJ028521			11-Nov-2005	Tyrannus melancholicus		Tropical Kingbird		Cornell University, Museum of Vertebrates		Tyrannus
BARG	KBARG255-07	MACN-Or-ct 2744		MACN-Or 70676	694[0n]	2	0	Yes	FJ028527			15-Nov-2006	Tyrannus savana		Fork-tailed Flycatcher		Museo Argentino de Ciencias Naturales		Tyrannus
BARG	KBARG058-07	MACN-Or-ct 1789		MACN-Or 69992	694[1n]	2	0	Yes	FJ028526			02-Oct-2006	Tyrannus savana		Fork-tailed Flycatcher		Museo Argentino de Ciencias Naturales		Tyrannus
BARG	KBARG025-07	MACN-Or-ct 1724		MACN-Or 69927	691[4n]	2	0	Yes	FJ028528			13-Sep-2006	Tyrannus savana	I	Fork-tailed Flycatcher		Museo Argentino de Ciencias Naturales		Tyrannus
BARG	KBARG278-07	MACN-Or-ct 2730		MACN-Or 70671	694[0n]	2	0	Yes	FJ028529			12-Nov-2006	Tyto alba		Barn Owl		Museo Argentino de Ciencias Naturales		Tyto
BARG	KBAR034-06	MACN-Or-ct 970	MJA 144		694[0n]	2	0	Yes	FJ028553			27-Oct-2005	Veniliornis frontalis		Dot-fronted Woodpecker		Cornell University, Museum of Vertebrates		Veniliornis
BARG	KAARG059-07	MACN-Or-ct 1707	MB 155	MACN-Or 69911	694[1n]	2	0	Yes	FJ028556			30-May-2006	Veniliornis passerinus		Little Woodpecker		Museo Argentino de Ciencias Naturales		Veniliornis
BARG	KBAR874-06	MACN-Or-ct 1640	MB 88	MACN-Or 69850	694[0n]	2	0	Yes	FJ028555			12-May-2006	Veniliornis passerinus		Little Woodpecker		Museo Argentino de Ciencias Naturales		Veniliornis
BARG	KBAR931-06	MACN-Or-ct 1709	MB 157	MACN-Or 69913	694[0n]	2	0	Yes	FJ028554			31-May-2006	Veniliornis passerinus		Little Woodpecker		Museo Argentino de Ciencias Naturales		Veniliornis
BARG	KBARG297-07	MACN-Or-ct 2885		MACN-Or 70746	694[0n]	2	0	Yes	FJ028560			10-Dec-2006	Vireo olivaceus		Red-eyed Vireo		Museo Argentino de Ciencias Naturales		Vireo
BARG	KBARG154-07	MACN-Or-ct 3061		MACN-Or 70834	694[0n]	2	0	Yes	FJ028559			01-Jun-2006	Vireo olivaceus		Red-eyed Vireo		Museo Argentino de Ciencias Naturales		Vireo
BARG	KBARG102-07	MACN-Or-ct 1815		MACN-Or 70017	694[1n]	2	0	Yes	FJ028558			11-Oct-2006	Vireo olivaceus		Red-eyed Vireo		Museo Argentino de Ciencias Naturales		Vireo
BARG	KBAR205-06	MACN-Or-ct 1121	MJA 200		694[0n]	2	0	Yes	FJ028561			11-Nov-2005	Vireo olivaceus		Red-eyed Vireo		Cornell University, Museum of Vertebrates		Vireo
BARG	KBAR206-06	MACN-Or-ct 1123	PB 029	MACN-Or 69195	671[6n]	2	0	Yes	FJ028557			11-Nov-2005	Vireo olivaceus		Red-eyed Vireo		Museo Argentino de Ciencias Naturales		Vireo
BARG	KBARG367-07	MACN-Or-ct 2931		MACN-Or 70774	694[0n]	2	0	Yes	FJ028566			13-Dec-2006	Xenops minutus		Plain Xenops		Museo Argentino de Ciencias Naturales		Xenops
BARG	KBARG359-07	MACN-Or-ct 2930		MACN-Or 70773	689[2n]	2	0	Yes	FJ028568			13-Dec-2006	Xenops minutus		Plain Xenops		Museo Argentino de Ciencias Naturales		Xenops
BARG	KBARG100-07	MACN-Or-ct 2060	GSC 209	MACN-Or 69298	694[4n]	2	0	Yes	FJ028567			20-Oct-2006	Xenops minutus		Plain Xenops		Museo Argentino de Ciencias Naturales		Xenops
BARG	KAARG379-07	MACN-Or-ct 2058	GSC 207	MACN-Or-pict 2058 (picture)	694[0n]	2	0	Yes	FJ028570			23-Oct-2006	Xiphocolaptes albicollis		White-throated Woodcreeper		Museo Argentino de Ciencias Naturales		Xiphocolaptes
BARG	KBARG401-07	MACN-Or-ct 2956		MACN-Or 69263	694[0n]	2	0	Yes	FJ028569			15-Dec-2006	Xiphocolaptes albicollis		White-throated Woodcreeper		Museo Argentino de Ciencias Naturales		Xiphocolaptes
BARG	KAARG612-07	MACN-Or-ct 3245		MACN-Or 70950	674[0n]	2	0	Yes	FJ028573			01-Aug-2007	Xiphocolaptes major		Great Rufous Woodcreeper		Museo Argentino de Ciencias Naturales	139.0 g	Xiphocolaptes
BARG	KBAR087-06	MACN-Or-ct 1000	MJA 157	MACN-Or 69120	694[0n]	2	0	Yes	FJ028572			31-Oct-2005	Xiphocolaptes major		Great Rufous Woodcreeper		Museo Argentino de Ciencias Naturales		Xiphocolaptes
BARG	KBAR088-06	MACN-Or-ct 793	MDE 158	KUNHM 96871	694[0n]	2	0	Yes	FJ028571			31-Oct-2005	Xiphocolaptes major		Great Rufous Woodcreeper		University of Kansas, Natural History Museum		Xiphocolaptes
BARG	KAARG535-07	MACN-Or-ct 2908		MACN-Or 70760	671[0n]	2	0	Yes	FJ028576			12-Dec-2006	Xiphorhynchus fuscus	I	Lesser Woodcreeper		Museo Argentino de Ciencias Naturales	18.6 g	Xiphorhynchus
BARG	KBARG171-07	MACN-Or-ct 2021	GSC 170	MACN-Or 69281	694[0n]	2	0	Yes	FJ028575			20-Oct-2006	Xiphorhynchus fuscus		Lesser Woodcreeper		Museo Argentino de Ciencias Naturales		Xiphorhynchus
BARG	KBARG404-07	MACN-Or-ct 2971		MACN-Or 69219	694[1n]	2	0	Yes	FJ028574			18-Dec-2006	Xiphorhynchus fuscus	I	Lesser Woodcreeper		Museo Argentino de Ciencias Naturales		Xiphorhynchus
BARG	KAARG565-07	MACN-Or-ct 3179		MACN-Or 70884	677[0n]	2	0	Yes	FJ028607			21-Jul-2007	Zonotrichia capensis		Rufous-collared Sparrow		Museo Argentino de Ciencias Naturales	20.8 g	Zonotrichia
BARG	KAARG553-07	MACN-Or-ct 3166		MACN-Or 70871	687[1n]	2	0	Yes	FJ028601			20-Jul-2007	Zonotrichia capensis		Rufous-collared Sparrow		Museo Argentino de Ciencias Naturales	19.0 g	Zonotrichia
BARG	KAARG262-07	MACN-Or-ct 2334		MACN-Or 70423	690[0n]	2	0	Yes	FJ028600			31-May-2007	Zonotrichia capensis		Rufous-collared Sparrow		Museo Argentino de Ciencias Naturales	Suspected female	Zonotrichia
BARG	KBARG232-07	MACN-Or-ct 2757		MACN-Or 70683	694[0n]	2	0	Yes	FJ028599			15-Nov-2006	Zonotrichia capensis		Rufous-collared Sparrow		Museo Argentino de Ciencias Naturales		Zonotrichia
BARG	KBAR795-06	MACN-Or-ct 1480		MACN-Or 69722	694[0n]	2	0	Yes	FJ028606			29-Apr-2006	Zonotrichia capensis		Rufous-collared Sparrow		Museo Argentino de Ciencias Naturales		Zonotrichia
BARG	KBAR609-06	MACN-Or-ct 051		MACN-Or 68474	694[0n]	2	0	Yes	FJ028605			12-Nov-2003	Zonotrichia capensis		Rufous-collared Sparrow		Museo Argentino de Ciencias Naturales		Zonotrichia
BARG	KBAR312-06	MACN-Or-ct 752	MDE 132	KUNHM 96866	694[0n]	2	0	Yes	FJ028604			26-Oct-2005	Zonotrichia capensis		Rufous-collared Sparrow		University of Kansas, Natural History Museum		Zonotrichia
BARG	KBAR308-06	MACN-Or-ct 671	GFB 3490	MACN-Or 68731	694[0n]	2	0	Yes	FJ028603			24-Jan-2005	Zonotrichia capensis		Rufous-collared Sparrow		Museo Argentino de Ciencias Naturales		Zonotrichia
BARG	KBAR294-06	MACN-Or-ct 1093	ASB 027	MACN-Or 69205	694[0n]	2	0	Yes	FJ028602			08-Nov-2005	Zonotrichia capensis		Rufous-collared Sparrow		Museo Argentino de Ciencias Naturales		Zonotrichia

## Sheet: SpecimenData
Project:	Neotropical			User :	Erika S. Tavares
Created :	19-May-2011
Sample ID	Field Number	Catalog Number	Collection Code	Institution Storing	Phylum	Class	Order	Family	Subfamily	Genus	Species	Identifier	Identifier email	Sex	Reproduction	Life Stage	Extra Info	Notes	Voucher Type	Tissue Type	Collectors	Date Collected	Continent	Country/Ocean	Province	Region	Sector	Exact Site	Lat	Lon	Elev	GPS Source
A.aburriB6	A.aburriB6			Royal Ontario Museum	Chordata	Aves	Galliformes	Cracidae		Aburria	Aburria aburri				S									Peru
LGEMA-363	462			Universidade de Sao Paulo, Departamento de Botanica	Chordata	Aves	Falconiformes	Accipitridae		Accipiter	Accipiter bicolor													Brazil	Piaui			PN Serra das Confusoes	-8.885	-43.455
DOT 12780	SC 887			American Museum of Natural History, Ornithology Department	Chordata	Aves	Ciconiiformes	Ardeidae		Agamia	Agamia agami
1B-125	SCL G	155923		Royal Ontario Museum	Chordata	Aves	Passeriformes	Icteridae		Agelaioides	Agelaioides badius			F	S	A	ssp:badius, Molothrus badius	voucher type: skin			Lougheed, S C	22-Feb-1989		Argentina	Tucuman			Soldado Moldonado	-27.08	-65.33
433089	433089		FMNH	Field Museum of Natural History	Chordata	Aves	Apodiformes	Trochilidae		Aglaeactis	Aglaeactis cupripennis			F	S		caumatonotus	voucher: skin				07-Nov-2001		Peru	Cuzco	Paucartambo		La Esperanza, 39 km (road) NE Paucartambo	-13.1	-71.356	2850
391043	391043		FMNH	Field Museum of Natural History	Chordata	Aves	Anseriformes	Anatidae		Amazonetta	Amazonetta brasiliensis			F	S			skeleton
LGEMA-2429	A0075		LGEMA	Universidade de Sao Paulo, Departamento de Botanica	Chordata	Aves	Passeriformes	Furnariidae		Anabacerthia	Anabacerthia amaurotis			M										Brazil	Sao Paulo			Juquitiba	-23.928	-42.065
A.flavirostris 1b	A.flavirostris1b			Royal Ontario Museum	Chordata	Aves	Anseriformes	Anatidae		Anas	Anas flavirostris				S		ssp: flavirostris					29-Apr-2005		Argentina	Rio Negro			San Antonio Oeste	-40.733	-64.933
A.flavirostris 1a	A.flavirostris1a			Royal Ontario Museum	Chordata	Aves	Anseriformes	Anatidae		Anas	Anas flavirostris				S		ssp: flavirostris					29-Apr-2005		Argentina	Rio Negro			San Antonio Oeste	-40.733	-64.933
DOT 6255	KGM 720			American Museum of Natural History, Ornithology Department	Chordata	Aves	Anseriformes	Anatidae		Anas	Anas specularioides
LGEMA-493	970180			Universidade de Sao Paulo, Departamento de Botanica	Chordata	Aves	Passeriformes	Furnariidae		Ancistrops	Ancistrops strigilatus													Brazil	Mato Grosso			Aripuana	-9.18	-60.63
1B-2338	1B-2338	159597		Royal Ontario Museum	Chordata	Aves	Psittaciformes	Psittacidae		Anodorhynchus	Anodorhynchus hyacinthinus			M	S	A	captive	voucher kind: skin				03-Feb-1995
LGEMA-69	254		LGEMA	Universidade de Sao Paulo, Departamento de Botanica	Chordata	Aves	Apodiformes	Trochilidae		Anopetia	Anopetia gounellei				S							25-Jan-2005		Brazil	Piaui			PN Serra das Confusoes	-8.885	-43.455
LGEMA-64	390		LGEMA	Universidade de Sao Paulo, Departamento de Botanica	Chordata	Aves	Apodiformes	Trochilidae		Anthracothorax	Anthracothorax nigricollis				S							25-Jan-2005		Brazil	Piaui			PN Serra das Confusoes	-8.885	-43.455
1B-6	1B-6			Royal Ontario Museum	Chordata	Aves	Psittaciformes	Psittacidae		Ara	Ara macao				S							01-Jan-1989
113953	FS4-25.1.91			Royal Ontario Museum	Chordata	Aves	Gruiformes	Rallidae		Aramides	Aramides axillaris				S							25-Jan-1991		Ecuador	Guayas			Manglares de Churute	-2.433	-79.65
LGEMA-395	27		LGEMA	Universidade de Sao Paulo, Departamento de Botanica	Chordata	Aves	Gruiformes	Rallidae		Aramides	Aramides cajanea				S									Brazil	Mato Grosso			Fazenda Ipe, Vila Rica	-9.967	-50.951	219
DOT 6197	JJW 336			American Museum of Natural History, Ornithology Department	Chordata	Aves	Gruiformes	Rallidae		Aramides	Aramides cajanea
1B-4290	1B-4290	95568	ROM	Royal Ontario Museum	Chordata	Aves	Psittaciformes	Psittacidae		Aratinga	Aratinga acuticaudata			M	S	A		voucher: skeleton				01-Jan-2003
1B-4059	1B-4059	91463	ROM	Royal Ontario Museum	Chordata	Aves	Psittaciformes	Psittacidae		Aratinga	Aratinga holochlora			F	S	A	rubritorquis	voucher: skin; skeleton				29-Apr-2003
LGEMA-1350	ITA265		LGEMA	Universidade de Sao Paulo, Departamento de Botanica	Chordata	Aves	Passeriformes	Emberizidae		Arremon	Arremon semitorquatus			M										Brazil	Parana			Venceslau Bras	-23.847	-49.795
LGEMA-2647	GSC22			Universidade de Sao Paulo, Departamento de Botanica	Chordata	Aves	Passeriformes	Emberizidae		Arremon	Arremon taciturnus													Brazil	Bahia			Lencois	-12.433	-41.363	520
LGEMA-535	58			Universidade de Sao Paulo, Departamento de Botanica	Chordata	Aves	Passeriformes	Emberizidae		Arremon	Arremon taciturnus													Brazil	Mato Grosso			Pontes, Lacerda e Vila Bela da Santissima Trindade	-15.205	-59.664
LGEMA-10245	255		LGEMA	Universidade de Sao Paulo, Departamento de Botanica	Chordata	Aves	Passeriformes	Emberizidae		Arremon	Arremon taciturnus													Brazil	Para			Agropalma, Moju	-1.88	-48.785
LGEMA-3004	A0141			Universidade de Sao Paulo, Departamento de Botanica	Chordata	Aves	Passeriformes	Tyrannidae		Arundinicola	Arundinicola leucocephala													Brazil	Sao Paulo			Buri	-23.8	-48.59
343218	343218		FMNH	Field Museum of Natural History	Chordata	Aves	Apodiformes	Trochilidae		Atthis	Atthis heloisa			F	S		heloisa					11-May-1989		Mexico	Oaxaca			Totontepec, Cerro de Zempoaltepetl	17.093	-96.696
LGEMA-9729	AMZ168		LGEMA	Universidade de Sao Paulo, Departamento de Botanica	Chordata	Aves	Passeriformes	Tyrannidae		Attila	Attila cinnamomeus													Brazil	Amazonas			Estrada Manacapuru-Novo Airao Km75	-3.075	-60.82
LGEMA-2436	A0082			Universidade de Sao Paulo, Departamento de Botanica	Chordata	Aves	Passeriformes	Tyrannidae		Attila	Attila rufus													Brazil	Sao Paulo			Juquitiba	-23.928	-42.065
429941	429941		FMNH	Field Museum of Natural History	Chordata	Aves	Apodiformes	Trochilidae		Augastes	Augastes geoffroyi			M	S		geoffroyi	voucher: skin				11-Apr-2001		Peru	Cuzco	Paucartambo		San Pedro	-13.323	-71.325	1480
1B-2332	1B-2332	159593		Royal Ontario Museum	Chordata	Aves	Piciformes	Ramphastidae		Aulacorhynchus	Aulacorhynchus haematopygus			M	S	A	captive	voucher kind: skeleton				10-Aug-1995
1B-274	1B-274		ROM	Royal Ontario Museum	Chordata	Aves	Piciformes	Ramphastidae		Aulacorhynchus	Aulacorhynchus haematopygus			M	S	A
LGEMA-9871		AMZ310		Universidade de Sao Paulo, Departamento de Botanica	Chordata	Aves	Passeriformes	Furnariidae		Automolus	Automolus infuscatus													Brazil	Amazonas			Rio Unini, Barcelos	-3.13	-62.78
LGEMA-9970	AMZ409		LGEMA	Universidade de Sao Paulo, Departamento de Botanica	Chordata	Aves	Passeriformes	Furnariidae		Automolus	Automolus ochrolaemus													Brazil	Amazonas			Rio Araca, Barcelos	-0.217	-63.04
334368	334368		FMNH	Field Museum of Natural History	Chordata	Aves	Apodiformes	Trochilidae		Avocettula	Avocettula recurvirostris			M	S			voucher: skin				30-Oct-2007		Brazil	Rondonia			Cachoeira Nazare, W bank Rio Jiparana	-10.878	-61.947	100
LGEMA-10429	m17483		LGEMA	Universidade de Sao Paulo, Departamento de Botanica	Chordata	Aves	Coraciiformes	Momotidae		Baryphthengus	Baryphthengus ruficapillus											01-Jun-2005		Brazil	Sao Paulo			Pontal do Paranapanema	-22.195	-51.48
LGEMA-2173	21 ROP			Universidade de Sao Paulo, Departamento de Botanica	Chordata	Aves	Passeriformes	Parulidae		Basileuterus	Basileuterus culicivorus													Brazil	Rio Grande do Sul			Arroio do Padre/Pelotas, Colonia Cerrito	-31.367	-52.383
LGEMA-10287	MMC195		LGEMA	Universidade de Sao Paulo, Departamento de Botanica	Chordata	Aves	Passeriformes	Parulidae		Basileuterus	Basileuterus culicivorus													Brazil	Rio de Janeiro			Fazenda Bela Vista, Cordeiro	-22.035	-42.302	337
LGEMA-2768	149			Universidade de Sao Paulo, Departamento de Botanica	Chordata	Aves	Passeriformes	Parulidae		Basileuterus	Basileuterus flaveolus													Brazil	Piaui			PN Serra das Confusoes	-8.885	-43.455
LGEMA-506	54			Universidade de Sao Paulo, Departamento de Botanica	Chordata	Aves	Passeriformes	Parulidae		Basileuterus	Basileuterus fulvicauda													Brazil	Mato Grosso			Pontes, Lacerda e Vila Bela da Santissima Trindade	-15.205	-59.664
LGEMA-10296	MMC180		LGEMA	Universidade de Sao Paulo, Departamento de Botanica	Chordata	Aves	Passeriformes	Parulidae		Basileuterus	Basileuterus hypoleucus											01-Jan-2005		Brazil	Minas Gerais			Ouro Preto	-21.433	-43.5
LGEMA-2196	47 ROP			Universidade de Sao Paulo, Departamento de Botanica	Chordata	Aves	Passeriformes	Parulidae		Basileuterus	Basileuterus leucoblepharus													Brazil	Santa Catarina			Rancho Queimado	-27.679	-49.007
429923	429923		FMNH	Field Museum of Natural History	Chordata	Aves	Apodiformes	Trochilidae		Boissonneaua	Boissonneaua matthewsii			F	S			voucher: skin				01-Apr-2001		Peru	Cuzco	Paucartambo		Pillahuata	-13.951	-71.354	2460
LGEMA-9877	AMZ316		LGEMA	Universidade de Sao Paulo, Departamento de Botanica	Chordata	Aves	Galbuliformes	Bucconidae		Bucco	Bucco capensis													Brazil	Amazonas			Rio Unini, Barcelos	-3.13	-62.78
LGEMA-304	UU197		LGEMA	Universidade de Sao Paulo, Departamento de Botanica	Chordata	Aves	Falconiformes	Accipitridae		Buteo	Buteo albicaudatus				S									Brazil	Piaui			Urucui-Una	-7.235	-44.553
LGEMA-361	425			Universidade de Sao Paulo, Departamento de Botanica	Chordata	Aves	Falconiformes	Accipitridae		Buteo	Buteo albonotatus													Brazil	Piaui			PN Serra das Confusoes	-8.885	-43.455
LGEMA-357	260			Universidade de Sao Paulo, Departamento de Botanica	Chordata	Aves	Falconiformes	Accipitridae		Buteo	Buteo magnirostris				S									Brazil	Piaui			PN Serra das Confusoes	-8.885	-43.455
LGEMA-257	ITA263		LGEMA	Universidade de Sao Paulo, Departamento de Botanica	Chordata	Aves	Falconiformes	Accipitridae		Buteo	Buteo magnirostris				S									Brazil	Parana			Venceslau Bras	-23.847	-49.795
LGEMA-9851	AMZ290		LGEMA	Universidade de Sao Paulo, Departamento de Botanica	Chordata	Aves	Passeriformes	Icteridae		Cacicus	Cacicus cela													Brazil	Amazonas			Rio Unini, Barcelos	-3.13	-62.78
LGEMA-3604	129		LGEMA	Universidade de Sao Paulo, Departamento de Botanica	Chordata	Aves	Piciformes	Picidae		Campephilus	Campephilus melanoleucos													Brazil	Piaui			PN Serra das Confusoes	-8.885	-43.455
3557	3557			Royal Ontario Museum	Chordata	Aves	Piciformes	Picidae		Campephilus	Campephilus rubricollis			F	S	A						27-Jul-1994		Guyana		Potaro Siparuni Region		5 km SE Surama	4.06	-59.025
LGEMA-20	85			Universidade de Sao Paulo, Departamento de Botanica	Chordata	Aves	Apodiformes	Trochilidae		Campylopterus	Campylopterus largipennis													Brazil	Mato Grosso			Juruena	-10.315	-58.49
392351	392351		FMNH	Field Museum of Natural History	Chordata	Aves	Apodiformes	Trochilidae		Campylopterus	Campylopterus macrourus				S		simoni, Eupetomena macroura	voucher deposited at Universidad Federal de Pernambuco				01-Jan-1999		Brazil	Pernambuco			Timbauba	-7.503	-35.314
LGEMA-2992	A0123		LGEMA	Universidade de Sao Paulo, Departamento de Botanica	Chordata	Aves	Passeriformes	Furnariidae		Campylorhamphus	Campylorhamphus falcularius			M										Brazil	Sao Paulo			Buri	-23.8	-48.59
LGEMA-430	970264		LGEMA	Universidade de Sao Paulo, Departamento de Botanica	Chordata	Aves	Passeriformes	Furnariidae		Campylorhamphus	Campylorhamphus procurvoides			F	S									Brazil	Mato Grosso			Aripuana	-9.18	-60.63
LGEMA-2746	118		LGEMA	Universidade de Sao Paulo, Departamento de Botanica	Chordata	Aves	Passeriformes	Furnariidae		Campylorhamphus	Campylorhamphus trochilirostris				S									Brazil	Piaui			PN Serra das Confusoes	-8.885	-43.455
LGEMA-9575	AMZ014		LGEMA	Universidade de Sao Paulo, Departamento de Botanica	Chordata	Aves	Piciformes	Capitonidae		Capito	Capito auratus													Brazil	Amazonas			Estrada Manacapuru-Novo Airao Km75	-3.075	-60.82
LGEMA-3289	970268		LGEMA	Universidade de Sao Paulo, Departamento de Botanica	Chordata	Aves	Piciformes	Capitonidae		Capito	Capito dayi			M										Brazil	Mato Grosso			Aripuana	-9.18	-60.63
LGEMA-104	202		LGEMA	Universidade de Sao Paulo, Departamento de Botanica	Chordata	Aves	Caprimulgiformes	Caprimulgidae		Caprimulgus	Caprimulgus longirostris				S							25-Jan-2005		Brazil	Piaui			PN Serra das Confusoes	-8.885	-43.455
LGEMA-9613	AMZ052		LGEMA	Universidade de Sao Paulo, Departamento de Botanica	Chordata	Aves	Caprimulgiformes	Caprimulgidae		Caprimulgus	Caprimulgus nigrescens													Brazil	Amazonas			Estrada Manacapuru-Novo Airao Km75	-3.075	-60.82
3515	3515			Royal Ontario Museum	Chordata	Aves	Caprimulgiformes	Caprimulgidae		Caprimulgus	Caprimulgus nigrescens			M	S							21-Jul-1994		Guyana		Potaro Siparuni Region		5 km SE Surama	4.06	-59.025
LGEMA-99	371		LGEMA	Universidade de Sao Paulo, Departamento de Botanica	Chordata	Aves	Caprimulgiformes	Caprimulgidae		Caprimulgus	Caprimulgus parvulus				S							25-Jan-2005		Brazil	Piaui			PN Serra das Confusoes	-8.885	-43.455
LGEMA-101	188			Universidade de Sao Paulo, Departamento de Botanica	Chordata	Aves	Caprimulgiformes	Caprimulgidae		Caprimulgus	Caprimulgus rufus													Brazil	Piaui			PN Serra das Confusoes	-8.885	-43.455
1B-931	1B-931	157406		Royal Ontario Museum	Chordata	Aves	Passeriformes	Fringillidae		Carduelis	Carduelis barbata			M	S	A		voucher kind: Skeleton						Argentina
LGEMA-2771	152		LGEMA	Universidade de Sao Paulo, Departamento de Botanica	Chordata	Aves	Passeriformes	Tyrannidae		Casiornis	Casiornis fuscus													Brazil	Piaui			PN Serra das Confusoes	-8.885	-43.455
LGEMA-526	25		LGEMA	Universidade de Sao Paulo, Departamento de Botanica	Chordata	Aves	Passeriformes	Tyrannidae		Casiornis	Casiornis rufus			M	S									Brazil	Mato Grosso			Pontes, Lacerda e Vila Bela da Santissima Trindade	-15.205	-59.664
LGEMA-362	438		LGEMA	Universidade de Sao Paulo, Departamento de Botanica	Chordata	Aves	Falconiformes	Cathartidae		Cathartes	Cathartes aura				S									Brazil	Piaui			PN Serra das Confusoes	-8.885	-43.455
LGEMA-359	392		LGEMA	Universidade de Sao Paulo, Departamento de Botanica	Chordata	Aves	Falconiformes	Cathartidae		Cathartes	Cathartes burrovianus				S									Brazil	Piaui			PN Serra das Confusoes	-8.885	-43.455
LGEMA-347	259		LGEMA	Universidade de Sao Paulo, Departamento de Botanica	Chordata	Aves	Falconiformes	Cathartidae		Cathartes	Cathartes melambrotus				S									Brazil	Para			Agropalma, Moju	-1.88	-48.785
LGEMA-10001	AMZ440		LGEMA	Universidade de Sao Paulo, Departamento de Botanica	Chordata	Aves	Piciformes	Picidae		Celeus	Celeus elegans													Brazil	Amazonas			Rio Araca, Barcelos	-0.217	-63.04
LGEMA-9650	AMZ089		LGEMA	Universidade de Sao Paulo, Departamento de Botanica	Chordata	Aves	Piciformes	Picidae		Celeus	Celeus grammicus													Brazil	Amazonas			Estrada Manacapuru-Novo Airao Km75	-3.075	-60.82
LGEMA-9727	AMZ166		LGEMA	Universidade de Sao Paulo, Departamento de Botanica	Chordata	Aves	Piciformes	Picidae		Celeus	Celeus torquatus													Brazil	Amazonas			Estrada Manacapuru-Novo Airao Km75	-3.075	-60.82
LGEMA-3253		MZUSP-76533	LGEMA	Universidade de Sao Paulo, Departamento de Botanica	Chordata	Aves	Passeriformes	Thamnophilidae		Cercomacra	Cercomacra laeta			M				Skin						Brazil	Maranhao			Horto Pompeia, Acailandia	-4.093	-47.299
LGEMA-3003	A0140			Universidade de Sao Paulo, Departamento de Botanica	Chordata	Aves	Passeriformes	Furnariidae		Certhiaxis	Certhiaxis cinnamomeus			F	S									Brazil	Sao Paulo			Buri	-23.8	-48.59
C.guodottiB11	C.guodottiB11			Royal Ontario Museum	Chordata	Aves	Galliformes	Cracidae		Chamaepetes	Chamaepetes goudotii				S									Peru
C.guodottiB10	C.guodottiB10			Royal Ontario Museum	Chordata	Aves	Galliformes	Cracidae		Chamaepetes	Chamaepetes goudotii				S									Peru
C.guodottiB9	C.guodottiB9			Royal Ontario Museum	Chordata	Aves	Galliformes	Cracidae		Chamaepetes	Chamaepetes goudotii				S									Peru
LGEMA-1183	ITA212		LGEMA	Universidade de Sao Paulo, Departamento de Botanica	Chordata	Aves	Passeriformes	Formicariidae		Chamaeza	Chamaeza meruloides				S									Brazil	Sao Paulo			Juquitiba	-23.928	-42.065
LGEMA-9691	AMZ130		LGEMA	Universidade de Sao Paulo, Departamento de Botanica	Chordata	Aves	Charadriiformes	Charadriidae		Charadrius	Charadrius collaris													Brazil	Amazonas			Estrada Manacapuru-Novo Airao Km75	-3.075	-60.82
LGEMA-9641	AMZ080		LGEMA	Universidade de Sao Paulo, Departamento de Botanica	Chordata	Aves	Galbuliformes	Bucconidae		Chelidoptera	Chelidoptera tenebrosa													Brazil	Amazonas			Estrada Manacapuru-Novo Airao Km75	-3.075	-60.82
LGEMA-3298	27		LGEMA	Universidade de Sao Paulo, Departamento de Botanica	Chordata	Aves	Galbuliformes	Bucconidae		Chelidoptera	Chelidoptera tenebrosa			M										Brazil	Mato Grosso			Pontes e Lacerda	-15.234	-59.331
LGEMA-2085	50045		LGEMA	Universidade de Sao Paulo, Departamento de Botanica	Chordata	Aves	Passeriformes	Pipridae		Chiroxiphia	Chiroxiphia caudata				S									Brazil	Sao Paulo	Piracicaba		Fazenda Barreiro Rico	-22.686	-48.127
LGEMA-9718	AMZ157		LGEMA	Universidade de Sao Paulo, Departamento de Botanica	Chordata	Aves	Passeriformes	Pipridae		Chiroxiphia	Chiroxiphia pareola													Brazil	Amazonas			Estrada Manacapuru-Novo Airao Km75	-3.075	-60.82
RHGE2	RHGE2			Royal Ontario Museum	Chordata	Aves	Anseriformes	Anatidae		Chloephaga	Chloephaga rubidiceps				S							01-Jan-2000		Chile	Magallanes-Antartica			Punta Arenas	-53.1	-70.54
RHGE1	RHGE1			Royal Ontario Museum	Chordata	Aves	Anseriformes	Anatidae		Chloephaga	Chloephaga rubidiceps				S							01-Jan-2001		Chile	Magallanes-Antartica			Punta Arenas	-53.1	-70.54
LGEMA-10319	A0149		LGEMA	Universidade de Sao Paulo, Departamento de Botanica	Chordata	Aves	Coraciiformes	Alcedinidae		Chloroceryle	Chloroceryle aenea			M								06-Nov-2006		Brazil	Sao Paulo			Praias de Boraceia e Guaratuba, Bertioga	-23.753	-45.893
LGEMA-187		skin: 970302	LGEMA	Universidade de Sao Paulo, Departamento de Botanica	Chordata	Aves	Coraciiformes	Alcedinidae		Chloroceryle	Chloroceryle aenea				S									Brazil	Mato Grosso			Aripuana	-9.18	-60.63
G13855	G13855			Royal Ontario Museum	Chordata	Aves	Coraciiformes	Alcedinidae		Chloroceryle	Chloroceryle americana			F	S	A		second year			A. J. Baker	16-Apr-1997		Brazil	Para			Salinas	-16.1	-42.15
G13853	G13853			Royal Ontario Museum	Chordata	Aves	Coraciiformes	Alcedinidae		Chloroceryle	Chloroceryle americana			F	S	A		after second year			A. J. Baker	16-Apr-1997		Brazil	Para			Salinas	-16.1	-42.15
GRKING	GRKING			Royal Ontario Museum	Chordata	Aves	Coraciiformes	Alcedinidae		Chloroceryle	Chloroceryle americana				S						A. J. Baker	14-Apr-1997		Brazil	Para			Salinas	-16.1	-42.15
LGEMA-9571	AMZ010		LGEMA	Universidade de Sao Paulo, Departamento de Botanica	Chordata	Aves	Passeriformes	Thraupidae		Chlorophanes	Chlorophanes spiza													Brazil	Amazonas			Estrada Manacapuru-Novo Airao Km75	-3.075	-60.82
396025	396025		FMNH	Field Museum of Natural History	Chordata	Aves	Apodiformes	Trochilidae		Chlorostilbon	Chlorostilbon notatus				S		cycnogenys							Bolivia
LGEMA-9753	AMZ192		LGEMA	Universidade de Sao Paulo, Departamento de Botanica	Chordata	Aves	Caprimulgiformes	Caprimulgidae		Chordeiles	Chordeiles acutipennis													Brazil	Amazonas			Estrada Manacapuru-Novo Airao Km75	-3.075	-60.82
392803	392803		FMNH	Field Museum of Natural History	Chordata	Aves	Apodiformes	Trochilidae		Chrysolampis	Chrysolampis mosquitus				S			voucher deposited at Universidad Federal de Pernambuco				01-Jan-1999		Brazil	Sergipe			Caninde do Sao Francisco, Curituba, Fazenda Porto Belo	-9.642	-37.789
LGEMA-60	506			Universidade de Sao Paulo, Departamento de Botanica	Chordata	Aves	Apodiformes	Trochilidae		Chrysolampis	Chrysolampis mosquitus													Brazil	Piaui			PN Serra das Confusoes	-8.885	-43.455
320805	320805		FMNH	Field Museum of Natural History	Chordata	Aves	Apodiformes	Trochilidae		Chrysuronia	Chrysuronia oenone			M	S		josephinae	voucher: skin				17-Nov-1985		Peru	Madre de Dios			Hacienda Amazonia	-11.651	-70.558	500
C.fusc11	C.fusc11			Royal Ontario Museum	Chordata	Aves	Passeriformes	Furnariidae		Cinclodes	Cinclodes fuscus				S		patagonica					31-Mar-2005		Argentina	Rio Negro			San Antonio Oeste	-40.742	-64.953
AJB 4395	AJB 4395	149779		Royal Ontario Museum	Chordata	Aves	Passeriformes	Furnariidae		Cinclodes	Cinclodes fuscus			F	S	A	ssp:fuscus	voucher type: skin, skeleton			A. J. Baker	24-Nov-1984		Argentina	Tierra del Fuego	Antartida, e Islas del Atlantico Sur		Ushuaia	-54.48	-68.19
395405	395405		FMNH	Field Museum of Natural History	Chordata	Aves	Apodiformes	Trochilidae		Clytolaema	Clytolaema rubricauda			F	S			skeleton				29-Jun-1991		Brazil	Sao Paulo			Boraceia	-22.192	-48.781	800
LGEMA-59	A0010		LGEMA	Universidade de Sao Paulo, Departamento de Botanica	Chordata	Aves	Apodiformes	Trochilidae		Clytolaema	Clytolaema rubricauda			F	S									Brazil	Sao Paulo			Piedade	-23.711	-47.419
LGEMA-523	7			Universidade de Sao Paulo, Departamento de Botanica	Chordata	Aves	Passeriformes	Tyrannidae		Cnemotriccus	Cnemotriccus fuscatus													Brazil	Mato Grosso			Pontes, Lacerda e Vila Bela da Santissima Trindade	-15.205	-59.664
LGEMA-9769	AMZ208		LGEMA	Universidade de Sao Paulo, Departamento de Botanica	Chordata	Aves	Passeriformes	Tyrannidae		Cnipodectes	Cnipodectes subbrunneus													Brazil	Amazonas			Estrada Manacapuru-Novo Airao Km75	-3.075	-60.82
LGEMA-9693	AMZ132		LGEMA	Universidade de Sao Paulo, Departamento de Botanica	Chordata	Aves	Cuculiformes	Cuculidae		Coccyzus	Coccyzus americanus													Brazil	Amazonas			Estrada Manacapuru-Novo Airao Km75	-3.075	-60.82
LGEMA-2724	49		LGEMA	Universidade de Sao Paulo, Departamento de Botanica	Chordata	Aves	Passeriformes	Coerebidae		Coereba	Coereba flaveola													Brazil	Piaui			PN Serra das Confusoes	-8.885	-43.455
LGEMA-174	B35617			Universidade de Sao Paulo, Departamento de Botanica	Chordata	Aves	Columbiformes	Columbidae		Columba	Columba palumbus													Brazil	Para			Para, ca115 km SWW Santarem, W of Rio Tapajos, Alto rio Arapiuns	-2.767	-55.708
DOVE1	DOVE1			Royal Ontario Museum	Chordata	Aves	Columbiformes	Columbidae		Columbina	Columbina passerina				S						A. J. Baker	14-Apr-1997		Brazil	Para			Salinas	-16.1	-42.15
LGEMA-2830	261			Universidade de Sao Paulo, Departamento de Botanica	Chordata	Aves	Passeriformes	Thraupidae		Compsothraupis	Compsothraupis loricata													Brazil	Piaui			PN Serra das Confusoes	-8.885	-43.455
LGEMA-2847	287		LGEMA	Universidade de Sao Paulo, Departamento de Botanica	Chordata	Aves	Passeriformes	Thraupidae		Compsothraupis	Compsothraupis loricata													Brazil	Piaui			PN Serra das Confusoes	-8.885	-43.455
LGEMA-10337	A0171		LGEMA	Universidade de Sao Paulo, Departamento de Botanica	Chordata	Aves	Passeriformes	Thraupidae		Conirostrum	Conirostrum bicolor			M								06-Nov-2006		Brazil	Sao Paulo			Praias de Boraceia e Guaratuba, Bertioga	-23.753	-45.893
LGEMA-1302	II A058		LGEMA	Universidade de Sao Paulo, Departamento de Botanica	Chordata	Aves	Passeriformes	Thraupidae		Conirostrum	Conirostrum speciosum													Brazil	Parana			Pinhalao	-23.967	-50.05
LGEMA-2107	LGEMA-2107			Universidade de Sao Paulo, Departamento de Botanica	Chordata	Aves	Passeriformes	Conopophagidae		Conopophaga	Conopophaga aurita													Brazil	Para			Jacareacanga	-6.021	-57.823
LGEMA-9588	AMZ027		LGEMA	Universidade de Sao Paulo, Departamento de Botanica	Chordata	Aves	Passeriformes	Conopophagidae		Conopophaga	Conopophaga aurita													Brazil	Amazonas			Estrada Manacapuru-Novo Airao Km75	-3.075	-60.82
LGEMA-467	970018		LGEMA	Universidade de Sao Paulo, Departamento de Botanica	Chordata	Aves	Passeriformes	Conopophagidae		Conopophaga	Conopophaga aurita			M	S									Brazil	Mato Grosso			Aripuana	-9.18	-60.63
LGEMA-2658	GSC38			Universidade de Sao Paulo, Departamento de Botanica	Chordata	Aves	Passeriformes	Conopophagidae		Conopophaga	Conopophaga lineata													Brazil	Bahia			Bonito	-11.913	-41.215	945
LGEMA-2049	50008			Universidade de Sao Paulo, Departamento de Botanica	Chordata	Aves	Passeriformes	Conopophagidae		Conopophaga	Conopophaga lineata													Brazil	Sao Paulo	Piracicaba		Fazenda Barreiro Rico	-22.686	-48.127
LGEMA-10365	GSC99		LGEMA	Universidade de Sao Paulo, Departamento de Botanica	Chordata	Aves	Passeriformes	Conopophagidae		Conopophaga	Conopophaga lineata													Argentina	Misiones			Paraje Maria Soledad, Dpto Gral Belgrano	-25.858	-53.984	304
LGEMA-10318	A0148			Universidade de Sao Paulo, Departamento de Botanica	Chordata	Aves	Passeriformes	Conopophagidae		Conopophaga	Conopophaga melanops													Brazil	Sao Paulo			Praias de Boraceia e Guaratuba, Bertioga	-23.753	-45.893
LGEMA-1756	7 ROP			Universidade de Sao Paulo, Departamento de Botanica	Chordata	Aves	Passeriformes	Conopophagidae		Conopophaga	Conopophaga melanops													Brazil	Rio de Janeiro			P.N. Itatiaia	-23.797	-45.979	775
LGEMA-1713	4 ROP			Universidade de Sao Paulo, Departamento de Botanica	Chordata	Aves	Passeriformes	Conopophagidae		Conopophaga	Conopophaga melanops													Brazil	Sao Paulo			Picianguaba	-23.367	-44.833
LGEMA-1613	23			Universidade de Sao Paulo, Departamento de Botanica	Chordata	Aves	Passeriformes	Conopophagidae		Conopophaga	Conopophaga melanops													Brazil	Sao Paulo			PETAR, Nucelo Caboclos	-24.475	-48.658
LGEMA-2105	ML99		LGEMA	Universidade de Sao Paulo, Departamento de Botanica	Chordata	Aves	Passeriformes	Conopophagidae		Conopophaga	Conopophaga melanops													Brazil	Alagoas			Fazenda Horizonte, Pilar	-9.59	-35.951
LGEMA-1528	LGEMA-1528		LGEMA	Universidade de Sao Paulo, Departamento de Botanica	Chordata	Aves	Passeriformes	Conopophagidae		Conopophaga	Conopophaga melanops													Brazil	Bahia
LGEMA-1641	131		LGEMA	Universidade de Sao Paulo, Departamento de Botanica	Chordata	Aves	Passeriformes	Conopophagidae		Conopophaga	Conopophaga roberti													Brazil	Piaui			Urucui-Una	-7.235	-44.553
LGEMA-1639	188		LGEMA	Universidade de Sao Paulo, Departamento de Botanica	Chordata	Aves	Passeriformes	Conopophagidae		Conopophaga	Conopophaga roberti													Brazil	Para			Agropalma, Moju	-1.88	-48.785
LGEMA-353	217		LGEMA	Universidade de Sao Paulo, Departamento de Botanica	Chordata	Aves	Falconiformes	Cathartidae		Coragyps	Coragyps atratus				S									Brazil	Piaui			Urucui-Una	-7.235	-44.553
LGEMA-2750	122		LGEMA	Universidade de Sao Paulo, Departamento de Botanica	Chordata	Aves	Passeriformes	Emberizidae		Coryphospingus	Coryphospingus pileatus													Brazil	Piaui			PN Serra das Confusoes	-8.885	-43.455
LGEMA-2368	16			Universidade de Sao Paulo, Departamento de Botanica	Chordata	Aves	Passeriformes	Tyrannidae		Corythopis	Corythopis delalandi													Brazil	Sao Paulo			P.E. Morro do Diabo, Teodoro Sampaio	-22.5	-52.333
LGEMA-410	19			Universidade de Sao Paulo, Departamento de Botanica	Chordata	Aves	Passeriformes	Tyrannidae		Corythopis	Corythopis torquatus													Brazil	Mato Grosso			Fazenda Ipe, Vila Rica	-9.967	-50.951
LGEMA-9548	541			Universidade de Sao Paulo, Departamento de Botanica	Chordata	Aves	Tinamiformes	Tinamidae		Crypturellus	Crypturellus parvirostris													Brazil	Piaui			PN Serra das Confusoes	-8.885	-43.455
LGEMA-9907	AMZ346		LGEMA	Universidade de Sao Paulo, Departamento de Botanica	Chordata	Aves	Tinamiformes	Tinamidae		Crypturellus	Crypturellus soui soui													Brazil	Amazonas			Rio Unini, Barcelos	-3.13	-62.78
LGEMA-9549	400		LGEMA	Universidade de Sao Paulo, Departamento de Botanica	Chordata	Aves	Tinamiformes	Tinamidae		Crypturellus	Crypturellus tataupa													Brazil	Piaui			PN Serra das Confusoes	-8.885	-43.455
LGEMA-9766	AMZ205		LGEMA	Universidade de Sao Paulo, Departamento de Botanica	Chordata	Aves	Passeriformes	Thraupidae		Cyanerpes	Cyanerpes caeruleus													Brazil	Amazonas			Estrada Manacapuru-Novo Airao Km75	-3.075	-60.82
LGEMA-9767	AMZ206			Universidade de Sao Paulo, Departamento de Botanica	Chordata	Aves	Passeriformes	Thraupidae		Cyanerpes	Cyanerpes nitidus				S									Brazil	Amapa			Estrada Manacapuru-Novo Airao Km75	-3.075	-60.82
LGEMA-2741	110		LGEMA	Universidade de Sao Paulo, Departamento de Botanica	Chordata	Aves	Passeriformes	Cardinalidae		Cyanocompsa	Cyanocompsa brissonii													Brazil	Piaui			PN Serra das Confusoes	-8.885	-43.455
LGEMA-10223	231		LGEMA	Universidade de Sao Paulo, Departamento de Botanica	Chordata	Aves	Passeriformes	Cardinalidae		Cyanocompsa	Cyanocompsa cyanoides						Originally identified as Passerina cyanoides							Brazil	Para			Agropalma, Moju	-1.88	-48.785
LGEMA-483	970182			Universidade de Sao Paulo, Departamento de Botanica	Chordata	Aves	Passeriformes	Cardinalidae		Cyanocompsa	Cyanocompsa cyanoides													Brazil	Mato Grosso			Aripuana	-9.18	-60.63
LGEMA-1649	LGEMA-1649		LGEMA	Universidade de Sao Paulo, Departamento de Botanica	Chordata	Aves	Passeriformes	Corvidae		Cyanocorax	Cyanocorax chrysops													Brazil	Sao Paulo			Pontal do Paranapanema	-22.195	-51.48
LGEMA-2702	18			Universidade de Sao Paulo, Departamento de Botanica	Chordata	Aves	Passeriformes	Corvidae		Cyanocorax	Cyanocorax cyanopogon													Brazil	Piaui			PN Serra das Confusoes	-8.885	-43.455
C.patagonus 5	C.patagonus5			Royal Ontario Museum	Chordata	Aves	Psittaciformes	Psittacidae		Cyanoliseus	Cyanoliseus patagonus				S		ssp: maculosa					29-Apr-2005		Argentina	Rio Negro			San Antonio Oeste	-40.733	-64.933
LGEMA-2774	155		LGEMA	Universidade de Sao Paulo, Departamento de Botanica	Chordata	Aves	Passeriformes	Vireonidae		Cyclarhis	Cyclarhis gujanensis													Brazil	Piaui			PN Serra das Confusoes	-8.885	-43.455
LGEMA-9669	AMZ108		LGEMA	Universidade de Sao Paulo, Departamento de Botanica	Chordata	Aves	Passeriformes	Thamnophilidae		Cymbilaimus	Cymbilaimus lineatus													Brazil	Amazonas			Estrada Manacapuru-Novo Airao Km75	-3.075	-60.82
LGEMA-487	970174		LGEMA	Universidade de Sao Paulo, Departamento de Botanica	Chordata	Aves	Passeriformes	Troglodytidae		Cyphorhinus	Cyphorhinus arada			M	S									Brazil	Mato Grosso			Aripuana	-9.18	-60.63
LGEMA-9810	AMZ249		LGEMA	Universidade de Sao Paulo, Departamento de Botanica	Chordata	Aves	Passeriformes	Troglodytidae		Cyphorhinus	Cyphorhinus arada													Brazil	Amazonas			Rio Unini, Barcelos	-3.13	-62.78
LGEMA-9684		AMZ123		Universidade de Sao Paulo, Departamento de Botanica	Chordata	Aves	Passeriformes	Thraupidae		Dacnis	Dacnis cayana													Brazil	Amazonas			Estrada Manacapuru-Novo Airao Km75	-3.075	-60.82
LGEMA-1305	II A063		LGEMA	Universidade de Sao Paulo, Departamento de Botanica	Chordata	Aves	Passeriformes	Thraupidae		Dacnis	Dacnis cayana													Brazil	Parana			Pinhalao	-23.967	-50.05
LGEMA-9721		AMZ160		Universidade de Sao Paulo, Departamento de Botanica	Chordata	Aves	Passeriformes	Furnariidae		Deconychura	Deconychura longicauda													Brazil	Amazonas			Estrada Manacapuru-Novo Airao Km75	-3.075	-60.82
LGEMA-428	970092		LGEMA	Universidade de Sao Paulo, Departamento de Botanica	Chordata	Aves	Passeriformes	Furnariidae		Deconychura	Deconychura longicauda				S									Brazil	Mato Grosso			Aripuana	-9.18	-60.63
LGEMA-595	53			Universidade de Sao Paulo, Departamento de Botanica	Chordata	Aves	Passeriformes	Furnariidae		Deconychura	Deconychura stictolaema													Brazil	Mato Grosso			Juruena	-10.315	-58.49
LGEMA-9789	AMZ228		LGEMA	Universidade de Sao Paulo, Departamento de Botanica	Chordata	Aves	Passeriformes	Furnariidae		Deconychura	Deconychura stictolaema													Brazil	Amazonas			Rio Unini, Barcelos	-3.13	-62.78
LGEMA-9881	AMZ320		LGEMA	Universidade de Sao Paulo, Departamento de Botanica	Chordata	Aves	Passeriformes	Furnariidae		Dendrocincla	Dendrocincla fuliginosa													Brazil	Amazonas			Rio Unini, Barcelos	-3.13	-62.78
LGEMA-3255		MZUSP-76552	LGEMA	Universidade de Sao Paulo, Departamento de Botanica	Chordata	Aves	Passeriformes	Furnariidae		Dendrocincla	Dendrocincla fuliginosa			M				Skin						Brazil	Tocantins			`Mata Virgem`, Palmeiras do Tocantins	-6.614	-47.547
3485	3485			Royal Ontario Museum	Chordata	Aves	Passeriformes	Furnariidae		Dendrocincla	Dendrocincla fuliginosa			M	S	A						17-Jul-1994		Guyana		Potaro Siparuni Region		5 km SE Surama	4.06	-59.025
LGEMA-3247		MZUSP-76543	LGEMA	Universidade de Sao Paulo, Departamento de Botanica	Chordata	Aves	Passeriformes	Furnariidae		Dendrocincla	Dendrocincla fuliginosa			F				Skin						Brazil	Maranhao			Horto Pompeia, Acailandia	-4.093	-47.299
LGEMA-9621	AMZ060		LGEMA	Universidade de Sao Paulo, Departamento de Botanica	Chordata	Aves	Passeriformes	Furnariidae		Dendrocincla	Dendrocincla merula													Brazil	Amazonas			Estrada Manacapuru-Novo Airao Km75	-3.075	-60.82
LGEMA-10321	A0151		LGEMA	Universidade de Sao Paulo, Departamento de Botanica	Chordata	Aves	Passeriformes	Furnariidae		Dendrocincla	Dendrocincla turdina			M								06-Nov-2006		Brazil	Sao Paulo			Praias de Boraceia e Guaratuba, Bertioga	-23.753	-45.893
LGEMA-9791	AMZ230		LGEMA	Universidade de Sao Paulo, Departamento de Botanica	Chordata	Aves	Passeriformes	Furnariidae		Dendrocolaptes	Dendrocolaptes certhia													Brazil	Amazonas			Rio Unini, Barcelos	-3.13	-62.78
LGEMA-407	15		LGEMA	Universidade de Sao Paulo, Departamento de Botanica	Chordata	Aves	Passeriformes	Furnariidae		Dendroplex	Dendroplex picus				S									Brazil	Mato Grosso			Fazenda Ipe, Vila Rica	-9.967	-50.951	219
LGEMA-9567		AMZ006		Universidade de Sao Paulo, Departamento de Botanica	Chordata	Aves	Passeriformes	Pipridae		Dixiphia	Dixiphia pipra													Brazil	Amazonas			Estrada Manacapuru-Novo Airao Km75	-3.075	-60.82
LGEMA-10208	216			Universidade de Sao Paulo, Departamento de Botanica	Chordata	Aves	Passeriformes	Pipridae		Dixiphia	Dixiphia pipra													Brazil	Para			Agropalma, Moju	-1.88	-48.785
LGEMA-10199	207			Universidade de Sao Paulo, Departamento de Botanica	Chordata	Aves	Passeriformes	Pipridae		Dixiphia	Dixiphia pipra													Brazil	Para			Agropalma, Moju	-1.88	-48.785
LGEMA-10200	208		LGEMA	Universidade de Sao Paulo, Departamento de Botanica	Chordata	Aves	Passeriformes	Pipridae		Dixiphia	Dixiphia pipra													Brazil	Para			Agropalma, Moju	-1.88	-48.785
3494	3494			Royal Ontario Museum	Chordata	Aves	Passeriformes	Pipridae		Dixiphia	Dixiphia pipra			M	S	A	ssp pipra, Pipra pipra					18-Jul-1994		Guyana		Potaro Siparuni Region		5 km SE Surama	4.06	-59.025
LGEMA-218	422			Universidade de Sao Paulo, Departamento de Botanica	Chordata	Aves	Cuculiformes	Cuculidae		Dromococcyx	Dromococcyx phasianellus													Brazil	Piaui			PN Serra das Confusoes	-8.885	-43.455
LGEMA-2411	A0054			Universidade de Sao Paulo, Departamento de Botanica	Chordata	Aves	Passeriformes	Thamnophilidae		Drymophila	Drymophila ferruginea													Brazil	Sao Paulo			Juquitiba	-23.928	-42.065
LGEMA-1162	ITA190			Universidade de Sao Paulo, Departamento de Botanica	Chordata	Aves	Passeriformes	Thamnophilidae		Drymophila	Drymophila malura													Brazil	Sao Paulo			Juquitiba	-23.928	-42.065
LGEMA-10294	MMC33		LGEMA	Universidade de Sao Paulo, Departamento de Botanica	Chordata	Aves	Passeriformes	Thamnophilidae		Drymophila	Drymophila ochropyga			F								16-Mar-2005		Brazil	Minas Gerais			Mata do Jambreiro, Nova Lima	-19.978	-43.88
LGEMA-10330	A0161			Universidade de Sao Paulo, Departamento de Botanica	Chordata	Aves	Passeriformes	Thamnophilidae		Drymophila	Drymophila squamata													Brazil	Sao Paulo			Praias de Boraceia e Guaratuba, Bertioga	-23.753	-45.893
LGEMA-9899	AMZ338		LGEMA	Universidade de Sao Paulo, Departamento de Botanica	Chordata	Aves	Piciformes	Picidae		Dryocopus	Dryocopus lineatus													Brazil	Amazonas			Rio Unini, Barcelos	-3.13	-62.78
LGEMA-3547	LGEMA-3547		LGEMA	Universidade de Sao Paulo, Departamento de Botanica	Chordata	Aves	Piciformes	Picidae		Dryocopus	Dryocopus lineatus													Brazil	Sao Paulo			Cotia	-23.604	-46.924
LGEMA-10292	MMC38		LGEMA	Universidade de Sao Paulo, Departamento de Botanica	Chordata	Aves	Passeriformes	Thamnophilidae		Dysithamnus	Dysithamnus mentalis			M								17-Mar-2005		Brazil	Minas Gerais			Mata do Jambreiro, Nova Lima	-19.978	-43.88
LGEMA-1067	IT89		LGEMA	Universidade de Sao Paulo, Departamento de Botanica	Chordata	Aves	Passeriformes	Thamnophilidae		Dysithamnus	Dysithamnus mentalis													Brazil	Sao Paulo			Piedade	-23.711	-47.419
433223	433223		FMNH	Field Museum of Natural History	Chordata	Aves	Apodiformes	Trochilidae		Ensifera	Ensifera ensifera			F	S			voucher: skin				07-Nov-2001		Peru	Cuzco	Paucartambo		La Esperanza, 39 km (road) NE Paucartambo	-13.1	-71.356	2900
E.elegans 6	E.elegans6			Royal Ontario Museum	Chordata	Aves	Tinamiformes	Tinamidae		Eudromia	Eudromia elegans				S		ssp: elegans					01-May-2005		Argentina	Rio Negro			San Antonio Oeste	-40.733	-64.933
1B-4454	1B-4454	101564		Royal Ontario Museum	Chordata	Aves	Tinamiformes	Tinamidae		Eudromia	Eudromia elegans			M	S	A	ssp elegans	voucher kind: Skeleton; wing			A. J. Baker	05-Dec-1984		Argentina	Chubut			Punta Tafor	-45.03	-66.16
AJB 4467	AJB 4467			Royal Ontario Museum	Chordata	Aves	Tinamiformes	Tinamidae		Eudromia	Eudromia elegans			F	S	A	ssp:patagonica					01-Dec-1984		Argentina	Chubut			Punta Tafor	-45.03	-66.16
AJB 4468	AJB 4468			Royal Ontario Museum	Chordata	Aves	Tinamiformes	Tinamidae		Eudromia	Eudromia elegans			M	S	A	ssp:patagonica					01-Dec-1984		Argentina	Chubut			Punta Tafor	-45.03	-66.16
AJB 4469	AJB 4469		AJB 4469	Royal Ontario Museum	Chordata	Aves	Tinamiformes	Tinamidae		Eudromia	Eudromia elegans				S		ssp: patagonica				A. J. Baker	01-Dec-1984		Argentina	Chubut			Punta Tafor	-45.03	-66.16
DOT 12688	SBB 39			American Museum of Natural History, Ornithology Department	Chordata	Aves	Tinamiformes	Tinamidae		Eudromia	Eudromia formosa
LGEMA-2689	428		LGEMA	Universidade de Sao Paulo, Departamento de Botanica	Chordata	Aves	Passeriformes	Fringillidae		Euphonia	Euphonia chlorotica													Brazil	Piaui			PN Serra das Confusoes	-8.885	-43.455
LGEMA-479	970066		LGEMA	Universidade de Sao Paulo, Departamento de Botanica	Chordata	Aves	Passeriformes	Fringillidae		Euphonia	Euphonia rufiventris			M	S									Brazil	Mato Grosso			Aripuana	-9.18	-60.63
LGEMA-524	17			Universidade de Sao Paulo, Departamento de Botanica	Chordata	Aves	Passeriformes	Tyrannidae		Euscarthmus	Euscarthmus meloryphus													Brazil	Mato Grosso			Pontes, Lacerda e Vila Bela da Santissima Trindade	-15.205	-59.664
LGEMA-2801	203		LGEMA	Universidade de Sao Paulo, Departamento de Botanica	Chordata	Aves	Passeriformes	Tyrannidae		Euscarthmus	Euscarthmus meloryphus													Brazil	Piaui			PN Serra das Confusoes	-8.885	-43.455
LGEMA-369	A0145			Universidade de Sao Paulo, Departamento de Botanica	Chordata	Aves	Falconiformes	Falconidae		Falco	Falco sparverius													Brazil	Sao Paulo			Buri	-23.8	-48.59
LGEMA-355	330			Universidade de Sao Paulo, Departamento de Botanica	Chordata	Aves	Falconiformes	Falconidae		Falco	Falco sparverius													Brazil	Piaui			Urucui-Una	-7.235	-44.553
399146	399146		FMNH	Field Museum of Natural History	Chordata	Aves	Apodiformes	Trochilidae		Florisuga	Florisuga fuscus				S			voucher at Universidade Pernambuco						Brazil	Pernambuco			Mata do Estado	-6.644	-36.868
LGEMA-54	A0043			Universidade de Sao Paulo, Departamento de Botanica	Chordata	Aves	Apodiformes	Trochilidae		Florisuga	Florisuga fuscus													Brazil	Sao Paulo			Juquitiba	-23.928	-42.065
LGEMA-10153	158		LGEMA	Universidade de Sao Paulo, Departamento de Botanica	Chordata	Aves	Passeriformes	Formicariidae		Formicarius	Formicarius analis						Originally identified as Formicivora analis							Brazil	Para			Agropalma, Moju	-1.88	-48.785
LGEMA-9700		AMZ139		Universidade de Sao Paulo, Departamento de Botanica	Chordata	Aves	Passeriformes	Formicariidae		Formicarius	Formicarius colma													Brazil	Amazonas			Estrada Manacapuru-Novo Airao Km75	-3.075	-60.82
LGEMA-10174	181	LGEMA-10174	LGEMA	Universidade de Sao Paulo, Departamento de Botanica	Chordata	Aves	Passeriformes	Formicariidae		Formicarius	Formicarius colma							Delete two traces files						Brazil	Para			Agropalma, Moju	-1.88	-48.785
LGEMA-513	20			Universidade de Sao Paulo, Departamento de Botanica	Chordata	Aves	Passeriformes	Thamnophilidae		Formicivora	Formicivora grisea													Brazil	Mato Grosso			Pontes, Lacerda e Vila Bela da Santissima Trindade	-15.205	-59.664
LGEMA-10290	MMC141		LGEMA	Universidade de Sao Paulo, Departamento de Botanica	Chordata	Aves	Passeriformes	Thamnophilidae		Formicivora	Formicivora grisea													Brazil	Bahia			Fazenda Sr. Joao Leal, Valenca	-13.367	-39.083
LGEMA-2764	141			Universidade de Sao Paulo, Departamento de Botanica	Chordata	Aves	Passeriformes	Thamnophilidae		Formicivora	Formicivora melanogaster													Brazil	Piaui			PN Serra das Confusoes	-8.885	-43.455
LGEMA-511	14			Universidade de Sao Paulo, Departamento de Botanica	Chordata	Aves	Passeriformes	Thamnophilidae		Formicivora	Formicivora rufa													Brazil	Mato Grosso			Pontes, Lacerda e Vila Bela da Santissima Trindade	-15.205	-59.664
LGEMA-9972	AMZ411		LGEMA	Universidade de Sao Paulo, Departamento de Botanica	Chordata	Aves	Passeriformes	Thamnophilidae		Frederickena	Frederickena viridis													Brazil	Amazonas			Rio Araca, Barcelos	-0.217	-63.04
3500	3500			Royal Ontario Museum	Chordata	Aves	Passeriformes	Thamnophilidae		Frederickena	Frederickena viridis			F	S	A						19-Jul-1994		Guyana		Potaro Siparuni Region		5 km SE Surama	4.06	-59.025
LGEMA-9864	AMZ303		LGEMA	Universidade de Sao Paulo, Departamento de Botanica	Chordata	Aves	Galbuliformes	Galbulidae		Galbula	Galbula albirostris													Brazil	Amazonas			Rio Unini, Barcelos	-3.13	-62.78
LGEMA-10246	256		LGEMA	Universidade de Sao Paulo, Departamento de Botanica	Chordata	Aves	Galbuliformes	Galbulidae		Galbula	Galbula dea													Brazil	Para			Agropalma, Moju	-1.88	-48.785
3523	3523			Royal Ontario Museum	Chordata	Aves	Galbuliformes	Galbulidae		Galbula	Galbula dea			M	S	A						23-Jul-1994		Guyana		Potaro Siparuni Region		5 km SE Surama	4.06	-59.025
LGEMA-9980	AMZ419		LGEMA	Universidade de Sao Paulo, Departamento de Botanica	Chordata	Aves	Galbuliformes	Galbulidae		Galbula	Galbula galbula													Brazil	Amazonas			Rio Araca, Barcelos	-0.217	-63.04
LGEMA-9751	AMZ190		LGEMA	Universidade de Sao Paulo, Departamento de Botanica	Chordata	Aves	Galbuliformes	Galbulidae		Galbula	Galbula leucogastra													Brazil	Amazonas			Estrada Manacapuru-Novo Airao Km75	-3.075	-60.82
LGEMA-3607	145		LGEMA	Universidade de Sao Paulo, Departamento de Botanica	Chordata	Aves	Galbuliformes	Galbulidae		Galbula	Galbula ruficauda													Brazil	Piaui			PN Serra das Confusoes	-8.885	-43.455
LGEMA-366	111			Universidade de Sao Paulo, Departamento de Botanica	Chordata	Aves	Falconiformes	Accipitridae		Gampsonyx	Gampsonyx swainsonii													Brazil	Para			Agropalma, Tailandia	-2.947	-48.953
LGEMA-305	Conf. 211		LGEMA	Universidade de Sao Paulo, Departamento de Botanica	Chordata	Aves	Falconiformes	Accipitridae		Gampsonyx	Gampsonyx swainsonii				S									Brazil	Piaui			PN Serra das Confusoes	-8.885	-43.455
1B-124	SCL F	155922		Royal Ontario Museum	Chordata	Aves	Passeriformes	Parulidae		Geothlypis	Geothlypis aequinoctialis			M	S	A	ssp:velata	voucher type: skin			Lougheed, S C	10-Oct-1988		Argentina	Jujuy			Rio de Zora, Intersection Rta 34	-23.44	-64.42
LGEMA-10283	MMC73			Universidade de Sao Paulo, Departamento de Botanica	Chordata	Aves	Columbiformes	Columbidae		Geotrygon	Geotrygon montana													Brazil	Espirito Santo			Santa Tereza	-20.311	-40.341
LGEMA-173		MZUSP 970278		Universidade de Sao Paulo, Departamento de Botanica	Chordata	Aves	Columbiformes	Columbidae		Geotrygon	Geotrygon montana													Brazil	Mato Grosso			Aripuana	-9.18	-60.63
LGEMA-9908	AMZ347		LGEMA	Universidade de Sao Paulo, Departamento de Botanica	Chordata	Aves	Columbiformes	Columbidae		Geotrygon	Geotrygon montana													Brazil	Amazonas			Rio Unini, Barcelos	-3.13	-62.78
LGEMA-303	UU390		LGEMA	Universidade de Sao Paulo, Departamento de Botanica	Chordata	Aves	Falconiformes	Accipitridae		Geranospiza	Geranospiza caerulescens				S									Brazil	Piaui			Urucui-Una	-7.235	-44.553
LGEMA-9529	297		LGEMA	Universidade de Sao Paulo, Departamento de Botanica	Chordata	Aves	Strigiformes	Strigidae		Glaucidium	Glaucidium brasilianum											25-Jan-2005		Brazil	Piaui			PN Serra das Confusoes	-8.885	-43.455
LGEMA-592	33			Universidade de Sao Paulo, Departamento de Botanica	Chordata	Aves	Passeriformes	Furnariidae		Glyphorynchus	Glyphorynchus spirurus													Brazil	Mato Grosso			Juruena	-10.315	-58.49
LGEMA-9566	AMZ005		LGEMA	Universidade de Sao Paulo, Departamento de Botanica	Chordata	Aves	Passeriformes	Furnariidae		Glyphorynchus	Glyphorynchus spirurus													Brazil	Amazonas			Estrada Manacapuru-Novo Airao Km75	-3.075	-60.82
LGEMA-9565	AMZ004		LGEMA	Universidade de Sao Paulo, Departamento de Botanica	Chordata	Aves	Passeriformes	Furnariidae		Glyphorynchus	Glyphorynchus spirurus													Brazil	Amazonas			Estrada Manacapuru-Novo Airao Km75	-3.075	-60.82
LGEMA-9796	AMZ235		LGEMA	Universidade de Sao Paulo, Departamento de Botanica	Chordata	Aves	Passeriformes	Furnariidae		Glyphorynchus	Glyphorynchus spirurus													Brazil	Amazonas			Rio Unini, Barcelos	-3.13	-62.78
LGEMA-2744	115		LGEMA	Universidade de Sao Paulo, Departamento de Botanica	Chordata	Aves	Passeriformes	Icteridae		Gnorimopsar	Gnorimopsar chopi													Brazil	Piaui			PN Serra das Confusoes	-8.885	-43.455
LGEMA-484	970198		LGEMA	Universidade de Sao Paulo, Departamento de Botanica	Chordata	Aves	Passeriformes	Parulidae		Granatellus	Granatellus pelzelni			F	S									Brazil	Mato Grosso			Aripuana	-9.18	-60.63
LGEMA-2546	LGEMA-2546			Universidade de Sao Paulo, Departamento de Botanica	Chordata	Aves	Passeriformes	Emberizidae		Gubernatrix	Gubernatrix cristata
LGEMA-1620	LGEMA-1620			Universidade de Sao Paulo, Departamento de Botanica	Chordata	Aves	Passeriformes	Tyrannidae		Gubernetes	Gubernetes yetapa													Brazil	Sao Paulo			Pirajui	-22	-49.45
LGEMA-9596	AMZ035		LGEMA	Universidade de Sao Paulo, Departamento de Botanica	Chordata	Aves	Passeriformes	Thamnophilidae		Gymnopithys	Gymnopithys leucaspis													Brazil	Amazonas			Estrada Manacapuru-Novo Airao Km75	-3.075	-60.82
LGEMA-10020	AMZ459		LGEMA	Universidade de Sao Paulo, Departamento de Botanica	Chordata	Aves	Passeriformes	Thamnophilidae		Gymnopithys	Gymnopithys rufigula													Brazil	Amazonas			Rio Araca, Barcelos	-0.217	-63.04
3525	3525			Royal Ontario Museum	Chordata	Aves	Passeriformes	Thamnophilidae		Gymnopithys	Gymnopithys rufigula			F	S	A						23-Jul-1994		Guyana		Potaro Siparuni Region		5 km SE Surama	4.06	-59.025
3486	3486			Royal Ontario Museum	Chordata	Aves	Passeriformes	Thamnophilidae		Gymnopithys	Gymnopithys rufigula			F	S	A						17-Jul-1994		Guyana		Potaro Siparuni Region		5 km SE Surama	4.06	-59.025
LGEMA-408	17			Universidade de Sao Paulo, Departamento de Botanica	Chordata	Aves	Passeriformes	Icteridae		Gymnostinops	Gymnostinops bifasciatus													Brazil	Mato Grosso			Fazenda Ipe, Vila Rica	-9.967	-50.951
LGEMA-2047	050006		LGEMA	Universidade de Sao Paulo, Departamento de Botanica	Chordata	Aves	Passeriformes	Thraupidae		Habia	Habia rubica													Brazil	Sao Paulo	Piracicaba		Fazenda Barreiro Rico	-22.686	-48.127
LGEMA-1397	LGEMA-1397		LGEMA	Universidade de Sao Paulo, Departamento de Botanica	Chordata	Aves	Passeriformes	Thraupidae		Habia	Habia rubica													Argentina	Misiones			Campo San Juan	-26.959	-54.195
LGEMA-1758	970068			Universidade de Sao Paulo, Departamento de Botanica	Chordata	Aves	Passeriformes	Thraupidae		Habia	Habia rubica													Brazil	Rio de Janeiro			P.N. Itatiaia	-23.797	-45.979	775
LGEMA-10316	A0146		LGEMA	Universidade de Sao Paulo, Departamento de Botanica	Chordata	Aves	Passeriformes	Thraupidae		Habia	Habia rubica			M								06-Nov-2006		Brazil	Sao Paulo			Praias de Boraceia e Guaratuba, Bertioga	-23.753	-45.893
3565	3565			Royal Ontario Museum	Chordata	Aves	Passeriformes	Cotingidae		Haematoderus	Haematoderus militaris			F	S	A						28-Jul-1994		Guyana		Potaro Siparuni Region		5 km SE Surama	4.06	-59.025
LGEMA-1611	21			Universidade de Sao Paulo, Departamento de Botanica	Chordata	Aves	Passeriformes	Emberizidae		Haplospiza	Haplospiza unicolor													Brazil	Sao Paulo			PETAR, Nucelo Caboclos	-24.475	-48.658
LGEMA-233	LGEMA-233			Universidade de Sao Paulo, Departamento de Botanica	Chordata	Aves	Falconiformes	Accipitridae		Harpagus	Harpagus bidentatus													Brazil	Mato Grosso			Pontes e Lacerda	-15.234	-59.331
LGEMA-307	121		LGEMA	Universidade de Sao Paulo, Departamento de Botanica	Chordata	Aves	Falconiformes	Accipitridae		Harpagus	Harpagus diodon				S									Brazil	Sao Paulo			EE Bananal	-23.406	-48.348
LGEMA-339	LGEMA-339	LGEMA-339	LGEMA-339	Universidade de Sao Paulo, Departamento de Botanica	Chordata	Aves	Falconiformes	Accipitridae		Harpyhaliaetus	Harpyhaliaetus coronatus							Delete two traces files						Brazil	Rio de Janeiro			Teresopolis	-22.418	-42.947
391270	391270		FMNH	Field Museum of Natural History	Chordata	Aves	Apodiformes	Trochilidae		Heliactin	Heliactin bilophus				S			voucher at Museu Goeldi						Brazil	Amapa
LGEMA-2194	45 ROP			Universidade de Sao Paulo, Departamento de Botanica	Chordata	Aves	Passeriformes	Furnariidae		Heliobletus	Heliobletus contaminatus													Brazil	Santa Catarina			Rancho Queimado	-27.679	-49.007
433205	433205		FMNH	Field Museum of Natural History	Chordata	Aves	Apodiformes	Trochilidae		Heliodoxa	Heliodoxa aurescens			M	S			voucher: skin				10-Oct-2001		Peru	Cuzco	Paucartambo		Consuelo, 15.9 km SW Pilcopata	-13.1	-71.286	1000
389718	389718		FMNH	Field Museum of Natural History	Chordata	Aves	Apodiformes	Trochilidae		Heliothryx	Heliothryx auritus				S		auriculata	skin and skeleton at Museu Goeldi				05-Nov-1986		Brazil	Rondonia			Cachoeira Nazare, W bank Rio Jiparana	-10.878	-61.947	100
LGEMA-9697	AMZ136		LGEMA	Universidade de Sao Paulo, Departamento de Botanica	Chordata	Aves	Apodiformes	Trochilidae		Heliothryx	Heliothryx barroti													Brazil	Amazonas			Estrada Manacapuru-Novo Airao Km75	-3.075	-60.82
LGEMA-9617	AMZ056		LGEMA	Universidade de Sao Paulo, Departamento de Botanica	Chordata	Aves	Passeriformes	Thraupidae		Hemithraupis	Hemithraupis flavicollis													Brazil	Amazonas			Estrada Manacapuru-Novo Airao Km75	-3.075	-60.82
LGEMA-485	970332		LGEMA	Universidade de Sao Paulo, Departamento de Botanica	Chordata	Aves	Passeriformes	Thraupidae		Hemithraupis	Hemithraupis flavicollis			F	S									Brazil	Mato Grosso			Aripuana	-9.18	-60.63
LGEMA-2832	264		LGEMA	Universidade de Sao Paulo, Departamento de Botanica	Chordata	Aves	Passeriformes	Thraupidae		Hemithraupis	Hemithraupis guira													Brazil	Piaui			PN Serra das Confusoes	-8.885	-43.455
LGEMA-1167	ITA196			Universidade de Sao Paulo, Departamento de Botanica	Chordata	Aves	Passeriformes	Tyrannidae		Hemitriccus	Hemitriccus diops													Brazil	Sao Paulo			Juquitiba	-23.928	-42.065
LGEMA-10298	MMC171		LGEMA	Universidade de Sao Paulo, Departamento de Botanica	Chordata	Aves	Passeriformes	Tyrannidae		Hemitriccus	Hemitriccus margaritaceiventer													Brazil	Bahia			Margem Sul do Rio Paraguacu, Chapada Diamantina, Andarai	-12.88	-41.342	408
LGEMA-2720	43			Universidade de Sao Paulo, Departamento de Botanica	Chordata	Aves	Passeriformes	Tyrannidae		Hemitriccus	Hemitriccus margaritaceiventer													Brazil	Piaui			PN Serra das Confusoes	-8.885	-43.455
LGEMA-10149	154		LGEMA	Universidade de Sao Paulo, Departamento de Botanica	Chordata	Aves	Passeriformes	Tyrannidae		Hemitriccus	Hemitriccus minor													Brazil	Para			Agropalma, Moju	-1.88	-48.785
LGEMA-559	93			Universidade de Sao Paulo, Departamento de Botanica	Chordata	Aves	Passeriformes	Tyrannidae		Hemitriccus	Hemitriccus minor													Brazil	Mato Grosso			Juruena	-10.315	-58.49
LGEMA-2412	A0055		LGEMA	Universidade de Sao Paulo, Departamento de Botanica	Chordata	Aves	Passeriformes	Tyrannidae		Hemitriccus	Hemitriccus nidipendulus			M										Brazil	Sao Paulo			Juquitiba	-23.928	-42.065
LGEMA-2078	50038			Universidade de Sao Paulo, Departamento de Botanica	Chordata	Aves	Passeriformes	Tyrannidae		Hemitriccus	Hemitriccus orbitatus													Brazil	Sao Paulo	Piracicaba		Fazenda Barreiro Rico	-22.686	-48.127
LGEMA-10301	MMC23			Universidade de Sao Paulo, Departamento de Botanica	Chordata	Aves	Passeriformes	Thamnophilidae		Herpsilochmus	Herpsilochmus atricapillus													Brazil	Minas Gerais			Sitio Capao Queimado, Cachoeira da Prata	-19.591	-44.599
LGEMA-2719	42		LGEMA	Universidade de Sao Paulo, Departamento de Botanica	Chordata	Aves	Passeriformes	Thamnophilidae		Herpsilochmus	Herpsilochmus sellowi						sellowi							Brazil	Piaui			PN Serra das Confusoes	-8.885	-43.455
LGEMA-10541	389	LGEMA-10541	LGEMA	Universidade de Sao Paulo, Departamento de Botanica	Chordata	Aves	Charadriiformes	Recurvirostridae		Himantopus	Himantopus mexicanus													Brazil	Piaui			PN Serra das Confusoes	-8.885	-43.455
LGEMA-594	51			Universidade de Sao Paulo, Departamento de Botanica	Chordata	Aves	Passeriformes	Furnariidae		Hylexetastes	Hylexetastes perrotii													Brazil	Mato Grosso			Juruena	-10.315	-58.49
LGEMA-2117	1			Universidade de Sao Paulo, Departamento de Botanica	Chordata	Aves	Passeriformes	Furnariidae		Hylexetastes	Hylexetastes uniformis													Brazil	Para			Jacareacanga	-6.021	-57.823
LGEMA-10335	A0169		LGEMA	Universidade de Sao Paulo, Departamento de Botanica	Chordata	Aves	Apodiformes	Trochilidae		Hylocharis	Hylocharis cyanus			M								06-Nov-2006		Brazil	Sao Paulo			Praias de Boraceia e Guaratuba, Bertioga	-23.753	-45.893
LGEMA-567	100			Universidade de Sao Paulo, Departamento de Botanica	Chordata	Aves	Passeriformes	Furnariidae		Hyloctistes	Hyloctistes subulatus													Brazil	Mato Grosso			Juruena	-10.315	-58.49
LGEMA-2773	154			Universidade de Sao Paulo, Departamento de Botanica	Chordata	Aves	Passeriformes	Formicariidae		Hylopezus	Hylopezus ochroleucus													Brazil	Piaui			PN Serra das Confusoes	-8.885	-43.455
LGEMA-10003		AMZ442		Universidade de Sao Paulo, Departamento de Botanica	Chordata	Aves	Passeriformes	Vireonidae		Hylophilus	Hylophilus ochraceiceps													Brazil	Amazonas			Rio Araca, Barcelos	-0.217	-63.04
LGEMA-600	105			Universidade de Sao Paulo, Departamento de Botanica	Chordata	Aves	Passeriformes	Vireonidae		Hylophilus	Hylophilus ochraceiceps													Brazil	Mato Grosso			Juruena	-10.315	-58.49
LGEMA-9675	AMZ114		LGEMA	Universidade de Sao Paulo, Departamento de Botanica	Chordata	Aves	Passeriformes	Vireonidae		Hylophilus	Hylophilus ochraceiceps													Brazil	Amazonas			Estrada Manacapuru-Novo Airao Km75	-3.075	-60.82
LGEMA-2120	LGEMA-2120			Universidade de Sao Paulo, Departamento de Botanica	Chordata	Aves	Passeriformes	Vireonidae		Hylophilus	Hylophilus semicinereus													Brazil	Para			Jacareacanga	-6.021	-57.823
LGEMA-9698		AMZ137		Universidade de Sao Paulo, Departamento de Botanica	Chordata	Aves	Passeriformes	Vireonidae		Hylophilus	Hylophilus thoracicus													Brazil	Amazonas			Estrada Manacapuru-Novo Airao Km75	-3.075	-60.82
LGEMA-2118	1			Universidade de Sao Paulo, Departamento de Botanica	Chordata	Aves	Passeriformes	Thamnophilidae		Hylophylax	Hylophylax naevius													Brazil	Para			Jacareacanga	-6.021	-57.823
LGEMA-9593	AMZ032		LGEMA	Universidade de Sao Paulo, Departamento de Botanica	Chordata	Aves	Passeriformes	Thamnophilidae		Hylophylax	Hylophylax naevius													Brazil	Amazonas			Estrada Manacapuru-Novo Airao Km75	-3.075	-60.82
LGEMA-9947		AMZ386		Universidade de Sao Paulo, Departamento de Botanica	Chordata	Aves	Passeriformes	Thamnophilidae		Hylophylax	Hylophylax poecilinotus													Brazil	Amazonas			Rio Araca, Barcelos	-0.217	-63.04
LGEMA-9894		AMZ333		Universidade de Sao Paulo, Departamento de Botanica	Chordata	Aves	Passeriformes	Thamnophilidae		Hylophylax	Hylophylax poecilinotus													Brazil	Amazonas			Rio Unini, Barcelos	-3.13	-62.78
LGEMA-450	970054			Universidade de Sao Paulo, Departamento de Botanica	Chordata	Aves	Passeriformes	Thamnophilidae		Hylophylax	Hylophylax poecilinotus													Brazil	Mato Grosso			Aripuana	-9.18	-60.63
LGEMA-522	57		LGEMA	Universidade de Sao Paulo, Departamento de Botanica	Chordata	Aves	Passeriformes	Thamnophilidae		Hylophylax	Hylophylax poecilinotus			M	S									Brazil	Mato Grosso			Pontes, Lacerda e Vila Bela da Santissima Trindade	-15.205	-59.664
LGEMA-9832	AMZ271		LGEMA	Universidade de Sao Paulo, Departamento de Botanica	Chordata	Aves	Passeriformes	Thamnophilidae		Hylophylax	Hylophylax poecilinotus													Brazil	Amazonas			Rio Unini, Barcelos	-3.13	-62.78
LGEMA-10205	213		LGEMA	Universidade de Sao Paulo, Departamento de Botanica	Chordata	Aves	Passeriformes	Thamnophilidae		Hylophylax	Hylophylax poecilinotus													Brazil	Para			Agropalma, Moju	-1.88	-48.785
LGEMA-466	970304			Universidade de Sao Paulo, Departamento de Botanica	Chordata	Aves	Passeriformes	Thamnophilidae		Hylophylax	Hylophylax punctulatus													Brazil	Mato Grosso			Aripuana	-9.18	-60.63
3506	3506			Royal Ontario Museum	Chordata	Aves	Passeriformes	Thamnophilidae		Hypocnemis	Hypocnemis cantator			M	S	A						19-Jul-1994		Guyana		Potaro Siparuni Region		5 km SE Surama	4.06	-59.025
LGEMA-446	970038			Universidade de Sao Paulo, Departamento de Botanica	Chordata	Aves	Passeriformes	Thamnophilidae		Hypocnemis	Hypocnemis cantator													Brazil	Mato Grosso			Aripuana	-9.18	-60.63
LGEMA-9616	AMZ055		LGEMA	Universidade de Sao Paulo, Departamento de Botanica	Chordata	Aves	Passeriformes	Thamnophilidae		Hypocnemis	Hypocnemis hypoxantha													Brazil	Amazonas			Estrada Manacapuru-Novo Airao Km75	-3.075	-60.82
LGEMA-348	LGEMA-348		LGEMA	Universidade de Sao Paulo, Departamento de Botanica	Chordata	Aves	Falconiformes	Falconidae		Ibycter	Ibycter americanus				S									Brazil	Rondonia			Mojica Nava	-9.421	-65.302
LGEMA-2779	160			Universidade de Sao Paulo, Departamento de Botanica	Chordata	Aves	Passeriformes	Icteridae		Icterus	Icterus cayanensis													Brazil	Piaui			PN Serra das Confusoes	-8.885	-43.455
LGEMA-9935	AMZ374		LGEMA	Universidade de Sao Paulo, Departamento de Botanica	Chordata	Aves	Passeriformes	Icteridae		Icterus	Icterus chrysocephalus													Brazil	Amazonas			Rio Unini, Barcelos	-3.13	-62.78
LGEMA-2742	113			Universidade de Sao Paulo, Departamento de Botanica	Chordata	Aves	Passeriformes	Icteridae		Icterus	Icterus jamacaii													Brazil	Piaui			PN Serra das Confusoes	-8.885	-43.455
LGEMA-342	LGEMA-342		LGEMA	Universidade de Sao Paulo, Departamento de Botanica	Chordata	Aves	Falconiformes	Accipitridae		Ictinia	Ictinia plumbea				S									Brazil	Sao Paulo			Sao Paulo	-23.549	-46.639
LGEMA-1147	ITA175		LGEMA	Universidade de Sao Paulo, Departamento de Botanica	Chordata	Aves	Passeriformes	Pipridae		Ilicura	Ilicura militaris				S									Brazil	Sao Paulo			Juquitiba	-23.928	-42.065
LGEMA-3301	113		LGEMA	Universidade de Sao Paulo, Departamento de Botanica	Chordata	Aves	Galbuliformes	Galbulidae		Jacamerops	Jacamerops aureus			F										Brazil	Mato Grosso			Juruena	-10.315	-58.49
LGEMA-9720	AMZ159		LGEMA	Universidade de Sao Paulo, Departamento de Botanica	Chordata	Aves	Galbuliformes	Galbulidae		Jacamerops	Jacamerops aureus													Brazil	Amazonas			Estrada Manacapuru-Novo Airao Km75	-3.075	-60.82
LGEMA-10152	157		LGEMA	Universidade de Sao Paulo, Departamento de Botanica	Chordata	Aves	Galbuliformes	Galbulidae		Jacamerops	Jacamerops aureus													Brazil	Para			Agropalma, Moju	-1.88	-48.785
393024	393024		FMNH	Field Museum of Natural History	Chordata	Aves	Apodiformes	Trochilidae		Klais	Klais guimeti			M	S		guimeti	voucher at Western Foundation of Vertebrate Zoology				08-Jul-1995		Costa Rica	Puntarenas			Potrero Grande, 12 km NE, Helechales	9.016	-83.126	1100
433151	433151		FMNH	Field Museum of Natural History	Chordata	Aves	Apodiformes	Trochilidae		Lafresnaya	Lafresnaya lafresnayi			M	S		rectirostris	voucher: skin				28-Oct-2001		Peru	Cuzco	Paucartambo		La Esperanza, 39 km (road) NE Paucartambo	-13.1	-71.356	2900
LGEMA-478	970030			Universidade de Sao Paulo, Departamento de Botanica	Chordata	Aves	Passeriformes	Thraupidae		Lanio	Lanio versicolor													Brazil	Mato Grosso			Aripuana	-9.18	-60.63
LGEMA-557	79			Universidade de Sao Paulo, Departamento de Botanica	Chordata	Aves	Passeriformes	Tyrannidae		Laniocera	Laniocera hypopyrra													Brazil	Mato Grosso			Juruena	-10.315	-58.49
LGEMA-9906	AMZ345		LGEMA	Universidade de Sao Paulo, Departamento de Botanica	Chordata	Aves	Passeriformes	Tyrannidae		Laniocera	Laniocera hypopyrra													Brazil	Amazonas			Rio Unini, Barcelos	-3.13	-62.78
LGEMA-1365	ITA286		LGEMA	Universidade de Sao Paulo, Departamento de Botanica	Chordata	Aves	Passeriformes	Tyrannidae		Lathrotriccus	Lathrotriccus euleri			M										Brazil	Parana			Venceslau Bras	-23.847	-49.795
LGEMA-404	12		LGEMA	Universidade de Sao Paulo, Departamento de Botanica	Chordata	Aves	Passeriformes	Tyrannidae		Lathrotriccus	Lathrotriccus euleri				S									Brazil	Mato Grosso			Fazenda Ipe, Vila Rica	-9.967	-50.951	219
LGEMA-9610	AMZ049		LGEMA	Universidade de Sao Paulo, Departamento de Botanica	Chordata	Aves	Passeriformes	Tyrannidae		Legatus	Legatus leucophaius													Brazil	Amazonas			Estrada Manacapuru-Novo Airao Km75	-3.075	-60.82
LGEMA-9568	AMZ007		LGEMA	Universidade de Sao Paulo, Departamento de Botanica	Chordata	Aves	Passeriformes	Furnariidae		Lepidocolaptes	Lepidocolaptes albolineatus													Brazil	Amazonas			Estrada Manacapuru-Novo Airao Km75	-3.075	-60.82
LGEMA-2231	331			Universidade de Sao Paulo, Departamento de Botanica	Chordata	Aves	Passeriformes	Furnariidae		Lepidocolaptes	Lepidocolaptes angustirostris													Brazil	Piaui			PN Serra das Confusoes	-8.885	-43.455
LGEMA-536	26			Universidade de Sao Paulo, Departamento de Botanica	Chordata	Aves	Passeriformes	Furnariidae		Lepidocolaptes	Lepidocolaptes angustirostris													Brazil	Mato Grosso			Pontes, Lacerda e Vila Bela da Santissima Trindade	-15.205	-59.664
LGEMA-2113	1			Universidade de Sao Paulo, Departamento de Botanica	Chordata	Aves	Passeriformes	Pipridae		Lepidothrix	Lepidothrix nattereri													Brazil	Para			Jacareacanga	-6.021	-57.823
LGEMA-546	7			Universidade de Sao Paulo, Departamento de Botanica	Chordata	Aves	Passeriformes	Pipridae		Lepidothrix	Lepidothrix nattereri													Brazil	Mato Grosso			Juruena	-10.315	-58.49
LGEMA-1063	LGEMA-1063			Universidade de Sao Paulo, Departamento de Botanica	Chordata	Aves	Passeriformes	Pipridae		Lepidothrix	Lepidothrix vilasboasi													Brazil	Para			Novo Progresso	-7.145	-55.378
LGEMA-10338	A0172		LGEMA	Universidade de Sao Paulo, Departamento de Botanica	Chordata	Aves	Passeriformes	Tyrannidae		Leptopogon	Leptopogon amaurocephalus			M								06-Nov-2006		Brazil	Sao Paulo			Praias de Boraceia e Guaratuba, Bertioga	-23.753	-45.893
LGEMA-10540	T35		LGEMA	Universidade de Sao Paulo, Departamento de Botanica	Chordata	Aves	Falconiformes	Accipitridae		Leucopternis	Leucopternis albicollis albicollis			M								15-Feb-2007		Brazil	Para			Tailandia	-2.947	-48.953
LGEMA-364	55		LGEMA	Universidade de Sao Paulo, Departamento de Botanica	Chordata	Aves	Falconiformes	Accipitridae		Leucopternis	Leucopternis kuhli				S									Brazil	Para			Agropalma, Tailandia	-2.947	-48.953
LGEMA-258	LGEMA-258		LGEMA	Universidade de Sao Paulo, Departamento de Botanica	Chordata	Aves	Falconiformes	Accipitridae		Leucopternis	Leucopternis lacernulatus			M	S									Brazil	Sao Paulo			Praia Grande	-23.999	-46.413
LGEMA-9671		AMZ110		Universidade de Sao Paulo, Departamento de Botanica	Chordata	Aves	Passeriformes	Cotingidae		Lipaugus	Lipaugus vociferans													Brazil	Amazonas			Estrada Manacapuru-Novo Airao Km75	-3.075	-60.82
LGEMA-608	30		LGEMA	Universidade de Sao Paulo, Departamento de Botanica	Chordata	Aves	Passeriformes	Cotingidae		Lipaugus	Lipaugus vociferans			F										Brazil	Mato Grosso			Juruena	-10.315	-58.49
LGEMA-2149	123 40 ROP			Universidade de Sao Paulo, Departamento de Botanica	Chordata	Aves	Passeriformes	Furnariidae		Lochmias	Lochmias nematura													Brazil	Santa Catarina			Rancho Queimado	-27.679	-49.007
3489	3489			Royal Ontario Museum	Chordata	Aves	Passeriformes	Tyrannidae		Lophotriccus	Lophotriccus galeatus			M	S	A						17-Jul-1994		Guyana		Potaro Siparuni Region		5 km SE Surama	4.06	-59.025
LGEMA-9603	AMZ042		LGEMA	Universidade de Sao Paulo, Departamento de Botanica	Chordata	Aves	Caprimulgiformes	Caprimulgidae		Lurocalis	Lurocalis semitorquatus													Brazil	Amazonas			Estrada Manacapuru-Novo Airao Km75	-3.075	-60.82
LGEMA-1174	ITA203		LGEMA	Universidade de Sao Paulo, Departamento de Botanica	Chordata	Aves	Passeriformes	Thamnophilidae		Mackenziaena	Mackenziaena severa				S									Brazil	Sao Paulo			Juquitiba	-23.928	-42.065
LGEMA-9932	AMZ371		LGEMA	Universidade de Sao Paulo, Departamento de Botanica	Chordata	Aves	Galbuliformes	Bucconidae		Malacoptila	Malacoptila fusca													Brazil	Amazonas			Rio Unini, Barcelos	-3.13	-62.78
LGEMA-3290	970150			Universidade de Sao Paulo, Departamento de Botanica	Chordata	Aves	Galbuliformes	Bucconidae		Malacoptila	Malacoptila rufa			F										Brazil	Mato Grosso			Aripuana	-9.18	-60.63
LGEMA-10189	197		LGEMA	Universidade de Sao Paulo, Departamento de Botanica	Chordata	Aves	Galbuliformes	Bucconidae		Malacoptila	Malacoptila rufa													Brazil	Para			Agropalma, Moju	-1.88	-48.785
LGEMA-3299	103			Universidade de Sao Paulo, Departamento de Botanica	Chordata	Aves	Galbuliformes	Bucconidae		Malacoptila	Malacoptila rufa													Brazil	Mato Grosso			Juruena	-10.315	-58.49
LGEMA-3300	106			Universidade de Sao Paulo, Departamento de Botanica	Chordata	Aves	Galbuliformes	Bucconidae		Malacoptila	Malacoptila rufa			F										Brazil	Mato Grosso			Juruena	-10.315	-58.49
LGEMA-3516	MZUSP ITA 213		LGEMA	Universidade de Sao Paulo, Departamento de Botanica	Chordata	Aves	Galbuliformes	Bucconidae		Malacoptila	Malacoptila striata													Brazil	Sao Paulo			Juquitiba	-23.928	-42.065
LGEMA-10327	A0158		LGEMA	Universidade de Sao Paulo, Departamento de Botanica	Chordata	Aves	Passeriformes	Pipridae		Manacus	Manacus manacus			M								06-Nov-2006		Brazil	Sao Paulo			Praias de Boraceia e Guaratuba, Bertioga	-23.753	-45.893
LGEMA-2077	050037		LGEMA	Universidade de Sao Paulo, Departamento de Botanica	Chordata	Aves	Passeriformes	Pipridae		Manacus	Manacus manacus													Brazil	Sao Paulo	Piracicaba		Fazenda Barreiro Rico	-22.686	-48.127
LGEMA-2767	148		LGEMA	Universidade de Sao Paulo, Departamento de Botanica	Chordata	Aves	Passeriformes	Tyrannidae		Megarynchus	Megarynchus pitangua													Brazil	Piaui			PN Serra das Confusoes	-8.885	-43.455
LGEMA-10247	258		LGEMA	Universidade de Sao Paulo, Departamento de Botanica	Chordata	Aves	Strigiformes	Strigidae		Megascops	Megascops atricapilla													Brazil	Para			Agropalma, Moju	-1.88	-48.785
LGEMA-9532	A0124		LGEMA	Universidade de Sao Paulo, Departamento de Botanica	Chordata	Aves	Strigiformes	Strigidae		Megascops	Megascops choliba											11-Dec-2005		Brazil	Sao Paulo			Buri	-23.8	-48.59
LGEMA-9765	AMZ204		LGEMA	Universidade de Sao Paulo, Departamento de Botanica	Chordata	Aves	Strigiformes	Strigidae		Megascops	Megascops choliba													Brazil	Amazonas			Estrada Manacapuru-Novo Airao Km75	-3.075	-60.82
LGEMA-9562	AMZ001		LGEMA	Universidade de Sao Paulo, Departamento de Botanica	Chordata	Aves	Passeriformes	Thamnophilidae		Megastictus	Megastictus margaritatus													Brazil	Amazonas			Estrada Manacapuru-Novo Airao Km75	-3.075	-60.82
LGEMA-2745	117		LGEMA	Universidade de Sao Paulo, Departamento de Botanica	Chordata	Aves	Passeriformes	Furnariidae		Megaxenops	Megaxenops parnaguae													Brazil	Piaui			PN Serra das Confusoes	-8.885	-43.455
LGEMA-9933	AMZ372		LGEMA	Universidade de Sao Paulo, Departamento de Botanica	Chordata	Aves	Piciformes	Picidae		Melanerpes	Melanerpes cruentatus													Brazil	Amazonas			Rio Unini, Barcelos	-3.13	-62.78
LGEMA-504	34		LGEMA	Universidade de Sao Paulo, Departamento de Botanica	Chordata	Aves	Passeriformes	Rhinocryptidae		Melanopareia	Melanopareia torquata			M	S									Brazil	Mato Grosso			Pontes, Lacerda e Vila Bela da Santissima Trindade	-15.205	-59.664
LGEMA-365	LGEMA-365		LGEMA	Universidade de Sao Paulo, Departamento de Botanica	Chordata	Aves	Falconiformes	Falconidae		Micrastur	Micrastur gilvicollis				S									Brazil	Amazonas			Javari	-4.774	-72.007
LGEMA-234	LGEMA-234			Universidade de Sao Paulo, Departamento de Botanica	Chordata	Aves	Falconiformes	Falconidae		Micrastur	Micrastur gilvicollis													Brazil	Mato Grosso			Juruena	-10.315	-58.49
LGEMA-350	84			Universidade de Sao Paulo, Departamento de Botanica	Chordata	Aves	Falconiformes	Falconidae		Micrastur	Micrastur gilvicollis													Brazil	Rondonia			Mojica Nava	-9.421	-65.302
LGEMA-343	50		LGEMA	Universidade de Sao Paulo, Departamento de Botanica	Chordata	Aves	Falconiformes	Falconidae		Micrastur	Micrastur ruficollis				S									Brazil	Sao Paulo			EE Bananal	-23.406	-48.348
LGEMA-356	7			Universidade de Sao Paulo, Departamento de Botanica	Chordata	Aves	Falconiformes	Falconidae		Micrastur	Micrastur ruficollis													Brazil	Piaui			PN Serra das Confusoes	-8.885	-43.455
LGEMA-345	173			Universidade de Sao Paulo, Departamento de Botanica	Chordata	Aves	Falconiformes	Falconidae		Micrastur	Micrastur ruficollis													Brazil	Para			Agropalma, Moju	-1.88	-48.785
LGEMA-358	272		LGEMA	Universidade de Sao Paulo, Departamento de Botanica	Chordata	Aves	Falconiformes	Falconidae		Micrastur	Micrastur semitorquatus				S									Brazil	Piaui			PN Serra das Confusoes	-8.885	-43.455
LGEMA-9591	AMZ030		LGEMA	Universidade de Sao Paulo, Departamento de Botanica	Chordata	Aves	Passeriformes	Polioptilidae		Microbates	Microbates collaris													Brazil	Amazonas			Estrada Manacapuru-Novo Airao Km75	-3.075	-60.82
LGEMA-10015		AMZ454		Universidade de Sao Paulo, Departamento de Botanica	Chordata	Aves	Passeriformes	Troglodytidae		Microcerculus	Microcerculus bambla													Brazil	Amazonas			Rio Araca, Barcelos	-0.217	-63.04
LGEMA-10207	215		LGEMA	Universidade de Sao Paulo, Departamento de Botanica	Chordata	Aves	Passeriformes	Troglodytidae		Microcerculus	Microcerculus marginatus													Brazil	Para			Agropalma, Moju	-1.88	-48.785
LGEMA-486	970034		LGEMA	Universidade de Sao Paulo, Departamento de Botanica	Chordata	Aves	Passeriformes	Troglodytidae		Microcerculus	Microcerculus marginatus				S									Brazil	Mato Grosso			Aripuana	-9.18	-60.63
LGEMA-352	64			Universidade de Sao Paulo, Departamento de Botanica	Chordata	Aves	Falconiformes	Falconidae		Milvago	Milvago chimachima				S									Brazil	Piaui			Urucui-Una	-7.235	-44.553
MIMUS	MIMUS			Royal Ontario Museum	Chordata	Aves	Passeriformes	Mimidae		Mimus	Mimus gilvus				S						A. J. Baker	15-Apr-1997		Brazil	Para			Salinas	-16.1	-42.15
LGEMA-1361	ITA279		LGEMA	Universidade de Sao Paulo, Departamento de Botanica	Chordata	Aves	Passeriformes	Mimidae		Mimus	Mimus saturninus			M										Brazil	Parana			Venceslau Bras	-23.847	-49.795
LGEMA-1647	15			Universidade de Sao Paulo, Departamento de Botanica	Chordata	Aves	Passeriformes	Tyrannidae		Mionectes	Mionectes macconnelli													Brazil	Para			Tailandia, Agropalma	-2.947	-48.953
LGEMA-1646	13			Universidade de Sao Paulo, Departamento de Botanica	Chordata	Aves	Passeriformes	Tyrannidae		Mionectes	Mionectes oleagineus													Brazil	Para			Tailandia, Agropalma	-2.947	-48.953
LGEMA-9965		AMZ404		Universidade de Sao Paulo, Departamento de Botanica	Chordata	Aves	Passeriformes	Tyrannidae		Mionectes	Mionectes oleagineus													Brazil	Amazonas			Rio Araca, Barcelos	-0.217	-63.04
LGEMA-9800	AMZ239		LGEMA	Universidade de Sao Paulo, Departamento de Botanica	Chordata	Aves	Passeriformes	Tyrannidae		Mionectes	Mionectes oleagineus													Brazil	Amazonas			Rio Unini, Barcelos	-3.13	-62.78
LGEMA-9885		AMZ324		Universidade de Sao Paulo, Departamento de Botanica	Chordata	Aves	Passeriformes	Tyrannidae		Mionectes	Mionectes oleagineus													Brazil	Amazonas			Rio Unini, Barcelos	-3.13	-62.78
3493	3493			Royal Ontario Museum	Chordata	Aves	Passeriformes	Tyrannidae		Mionectes	Mionectes oleagineus			F	S	A						18-Jul-1994		Guyana		Potaro Siparuni Region		5 km SE Surama	4.06	-59.025
3487	3487			Royal Ontario Museum	Chordata	Aves	Passeriformes	Tyrannidae		Mionectes	Mionectes oleagineus			M	S	A						17-Jul-1994		Guyana		Potaro Siparuni Region		5 km SE Surama	4.06	-59.025
LGEMA-10062	AMZ501		LGEMA	Universidade de Sao Paulo, Departamento de Botanica	Chordata	Aves	Galliformes	Cracidae		Mitu	Mitu tomentosum													Brazil	Amazonas			Rio Araca, Barcelos	-0.217	-63.04
LGEMA-9667	AMZ106		LGEMA	Universidade de Sao Paulo, Departamento de Botanica	Chordata	Aves	Galbuliformes	Bucconidae		Monasa	Monasa morphoeus													Brazil	Amazonas			Estrada Manacapuru-Novo Airao Km75	-3.075	-60.82
LGEMA-3306	90		LGEMA	Universidade de Sao Paulo, Departamento de Botanica	Chordata	Aves	Galbuliformes	Bucconidae		Monasa	Monasa morphoeus													Brazil	Mato Grosso			Juruena	-10.315	-58.49
LGEMA-3428	B-35587			Universidade de Sao Paulo, Departamento de Botanica	Chordata	Aves	Galbuliformes	Bucconidae		Monasa	Monasa morphoeus
LGEMA-9860		AMZ299		Universidade de Sao Paulo, Departamento de Botanica	Chordata	Aves	Galbuliformes	Bucconidae		Monasa	Monasa morphoeus													Brazil	Amazonas			Rio Unini, Barcelos	-3.13	-62.78
LGEMA-3297	3			Universidade de Sao Paulo, Departamento de Botanica	Chordata	Aves	Galbuliformes	Bucconidae		Monasa	Monasa morphoeus													Brazil	Mato Grosso			Pontes, Lacerda e Vila Bela da Santissima Trindade	-15.205	-59.664
LGEMA-9644	AMZ083		LGEMA	Universidade de Sao Paulo, Departamento de Botanica	Chordata	Aves	Galbuliformes	Bucconidae		Monasa	Monasa nigrifrons													Brazil	Amazonas			Estrada Manacapuru-Novo Airao Km75	-3.075	-60.82
LGEMA-9750	AMZ189		LGEMA	Universidade de Sao Paulo, Departamento de Botanica	Chordata	Aves	Passeriformes	Tyrannidae		Myiarchus	Myiarchus ferox													Brazil	Amazonas			Estrada Manacapuru-Novo Airao Km75	-3.075	-60.82
LGEMA-2986	A0112		LGEMA	Universidade de Sao Paulo, Departamento de Botanica	Chordata	Aves	Passeriformes	Tyrannidae		Myiarchus	Myiarchus swainsoni			F										Brazil	Sao Paulo			Buri	-23.8	-48.59
LGEMA-2752	124		LGEMA	Universidade de Sao Paulo, Departamento de Botanica	Chordata	Aves	Passeriformes	Tyrannidae		Myiarchus	Myiarchus tyrannulus													Brazil	Piaui			PN Serra das Confusoes	-8.885	-43.455
LGEMA-2816	233		LGEMA	Universidade de Sao Paulo, Departamento de Botanica	Chordata	Aves	Passeriformes	Tyrannidae		Myiobius	Myiobius atricaudus													Brazil	Piaui			PN Serra das Confusoes	-8.885	-43.455
LGEMA-2410	A0053			Universidade de Sao Paulo, Departamento de Botanica	Chordata	Aves	Passeriformes	Tyrannidae		Myiobius	Myiobius atricaudus													Brazil	Sao Paulo			Juquitiba	-23.928	-42.065
LGEMA-2797	183			Universidade de Sao Paulo, Departamento de Botanica	Chordata	Aves	Passeriformes	Tyrannidae		Myiobius	Myiobius atricaudus													Brazil	Piaui			PN Serra das Confusoes	-8.885	-43.455
LGEMA-10323	A0153			Universidade de Sao Paulo, Departamento de Botanica	Chordata	Aves	Passeriformes	Tyrannidae		Myiobius	Myiobius barbatus			M								06-Nov-2006		Brazil	Sao Paulo			Praias de Boraceia e Guaratuba, Bertioga	-23.753	-45.893
LGEMA-10339	A0173			Universidade de Sao Paulo, Departamento de Botanica	Chordata	Aves	Passeriformes	Tyrannidae		Myiobius	Myiobius barbatus			F								06-Nov-2006		Brazil	Sao Paulo			Praias de Boraceia e Guaratuba, Bertioga	-23.753	-45.893
LGEMA-10190	198		LGEMA	Universidade de Sao Paulo, Departamento de Botanica	Chordata	Aves	Passeriformes	Tyrannidae		Myiobius	Myiobius barbatus													Brazil	Para			Agropalma, Moju	-1.88	-48.785
LGEMA-399	6			Universidade de Sao Paulo, Departamento de Botanica	Chordata	Aves	Passeriformes	Tyrannidae		Myiobius	Myiobius barbatus													Brazil	Mato Grosso			Fazenda Ipe, Vila Rica	-9.967	-50.951
LGEMA-2628	GSC2			Universidade de Sao Paulo, Departamento de Botanica	Chordata	Aves	Passeriformes	Tyrannidae		Myiobius	Myiobius barbatus													Brazil	Bahia			Lencois	-12.433	-41.363	520
LGEMA-2841	281		LGEMA	Universidade de Sao Paulo, Departamento de Botanica	Chordata	Aves	Passeriformes	Tyrannidae		Myiodynastes	Myiodynastes maculatus													Brazil	Piaui			PN Serra das Confusoes	-8.885	-43.455
LGEMA-436	970114		LGEMA	Universidade de Sao Paulo, Departamento de Botanica	Chordata	Aves	Passeriformes	Tyrannidae		Myiornis	Myiornis ecaudatus			M	S									Brazil	Mato Grosso			Aripuana	-9.18	-60.63
LGEMA-435	970112		LGEMA	Universidade de Sao Paulo, Departamento de Botanica	Chordata	Aves	Passeriformes	Tyrannidae		Myiozetetes	Myiozetetes luteiventris				S									Brazil	Mato Grosso			Aripuana	-9.18	-60.63
LGEMA-516	37		LGEMA	Universidade de Sao Paulo, Departamento de Botanica	Chordata	Aves	Passeriformes	Thamnophilidae		Myrmeciza	Myrmeciza atrothorax			F	S									Brazil	Mato Grosso			Pontes, Lacerda e Vila Bela da Santissima Trindade	-15.205	-59.664
LGEMA-10019		AMZ458		Universidade de Sao Paulo, Departamento de Botanica	Chordata	Aves	Passeriformes	Thamnophilidae		Myrmeciza	Myrmeciza atrothorax													Brazil	Amazonas			Rio Araca, Barcelos	-0.217	-63.04
LGEMA-515	36			Universidade de Sao Paulo, Departamento de Botanica	Chordata	Aves	Passeriformes	Thamnophilidae		Myrmeciza	Myrmeciza hemimelaena													Brazil	Mato Grosso			Pontes, Lacerda e Vila Bela da Santissima Trindade	-15.205	-59.664
LGEMA-10328	A0159		LGEMA	Universidade de Sao Paulo, Departamento de Botanica	Chordata	Aves	Passeriformes	Thamnophilidae		Myrmeciza	Myrmeciza squamosa			M								06-Nov-2006		Brazil	Sao Paulo			Praias de Boraceia e Guaratuba, Bertioga	-23.753	-45.893
LGEMA-589	98			Universidade de Sao Paulo, Departamento de Botanica	Chordata	Aves	Passeriformes	Thamnophilidae		Myrmoborus	Myrmoborus myotherinus													Brazil	Mato Grosso			Juruena	-10.315	-58.49
LGEMA-9587	AMZ026		LGEMA	Universidade de Sao Paulo, Departamento de Botanica	Chordata	Aves	Passeriformes	Thamnophilidae		Myrmoborus	Myrmoborus myotherinus													Brazil	Amazonas			Estrada Manacapuru-Novo Airao Km75	-3.075	-60.82
LGEMA-2782	163			Universidade de Sao Paulo, Departamento de Botanica	Chordata	Aves	Passeriformes	Thamnophilidae		Myrmorchilus	Myrmorchilus strigilatus													Brazil	Piaui			PN Serra das Confusoes	-8.885	-43.455
LGEMA-463	970178		LGEMA	Universidade de Sao Paulo, Departamento de Botanica	Chordata	Aves	Passeriformes	Thamnophilidae		Myrmornis	Myrmornis torquata			F	S									Brazil	Mato Grosso			Aripuana	-9.18	-60.63
LGEMA-10024	AMZ463		LGEMA	Universidade de Sao Paulo, Departamento de Botanica	Chordata	Aves	Passeriformes	Thamnophilidae		Myrmotherula	Myrmotherula axillaris													Brazil	Amazonas			Rio Araca, Barcelos	-0.217	-63.04
LGEMA-10154	159		LGEMA	Universidade de Sao Paulo, Departamento de Botanica	Chordata	Aves	Passeriformes	Thamnophilidae		Myrmotherula	Myrmotherula axillaris													Brazil	Para			Agropalma, Moju	-1.88	-48.785
LGEMA-3234		MZUSP-76524		Universidade de Sao Paulo, Departamento de Botanica	Chordata	Aves	Passeriformes	Thamnophilidae		Myrmotherula	Myrmotherula axillaris													Brazil	Maranhao			Horto Pompeia, Acailandia	-4.093	-47.299
LGEMA-1146	ITA173			Universidade de Sao Paulo, Departamento de Botanica	Chordata	Aves	Passeriformes	Thamnophilidae		Myrmotherula	Myrmotherula gularis													Brazil	Sao Paulo			Juquitiba	-23.928	-42.065
LGEMA-9866	AMZ305		LGEMA	Universidade de Sao Paulo, Departamento de Botanica	Chordata	Aves	Passeriformes	Thamnophilidae		Myrmotherula	Myrmotherula haematonota													Brazil	Amazonas			Rio Unini, Barcelos	-3.13	-62.78
LGEMA-10169	176			Universidade de Sao Paulo, Departamento de Botanica	Chordata	Aves	Passeriformes	Thamnophilidae		Myrmotherula	Myrmotherula hauxwelli													Brazil	Para			Moju, Agropalma	-2.618	-48.78	51
LGEMA-451	970056			Universidade de Sao Paulo, Departamento de Botanica	Chordata	Aves	Passeriformes	Thamnophilidae		Myrmotherula	Myrmotherula hauxwelli													Brazil	Mato Grosso			Aripuana	-9.18	-60.63
LGEMA-448	970048			Universidade de Sao Paulo, Departamento de Botanica	Chordata	Aves	Passeriformes	Thamnophilidae		Myrmotherula	Myrmotherula leucophthalma													Brazil	Mato Grosso			Aripuana	-9.18	-60.63
LGEMA-9590		AMZ029		Universidade de Sao Paulo, Departamento de Botanica	Chordata	Aves	Passeriformes	Thamnophilidae		Myrmotherula	Myrmotherula longipennis													Brazil	Amazonas			Estrada Manacapuru-Novo Airao Km75	-3.075	-60.82
LGEMA-582	76		LGEMA	Universidade de Sao Paulo, Departamento de Botanica	Chordata	Aves	Passeriformes	Thamnophilidae		Myrmotherula	Myrmotherula longipennis			M										Brazil	Mato Grosso			Juruena	-10.315	-58.49
LGEMA-10167	174		LGEMA	Universidade de Sao Paulo, Departamento de Botanica	Chordata	Aves	Passeriformes	Thamnophilidae		Myrmotherula	Myrmotherula menetriesii													Brazil	Para			Agropalma, Moju	-1.88	-48.785
LGEMA-10324	A0154		LGEMA	Universidade de Sao Paulo, Departamento de Botanica	Chordata	Aves	Passeriformes	Thamnophilidae		Myrmotherula	Myrmotherula unicolor			F								06-Nov-2006		Brazil	Sao Paulo			Praias de Boraceia e Guaratuba, Bertioga	-23.753	-45.893
LGEMA-9626	AMZ065		LGEMA	Universidade de Sao Paulo, Departamento de Botanica	Chordata	Aves	Passeriformes	Furnariidae		Nasica	Nasica longirostris													Brazil	Amazonas			Estrada Manacapuru-Novo Airao Km75	-3.075	-60.82
LGEMA-2786	170			Universidade de Sao Paulo, Departamento de Botanica	Chordata	Aves	Passeriformes	Thraupidae		Nemosia	Nemosia pileata													Brazil	Piaui			PN Serra das Confusoes	-8.885	-43.455
DOT 6320	KGM 785			American Museum of Natural History, Ornithology Department	Chordata	Aves	Anseriformes	Anatidae		Netta	Netta peposaca
1B-1642	1B-1642	157861		Royal Ontario Museum	Chordata	Aves	Tinamiformes	Tinamidae		Nothoprocta	Nothoprocta cinerascens			F	S	A	captive ssp: cinerascens	voucher kind: skeleton				23-May-1991
JG 018	JG 018			Royal Ontario Museum	Chordata	Aves	Tinamiformes	Tinamidae		Nothoprocta	Nothoprocta ornata				S						Gonzalez, J G, Sr	26-Jul-1995		Chile	Tarapaca			Chocuyo, Portezuelo de Putre	-18.13	-69.35
N.darwini 9	N.darwini9			Royal Ontario Museum	Chordata	Aves	Tinamiformes	Tinamidae		Nothura	Nothura darwinii				S	A						16-Apr-2005		Argentina	Rio Negro			San Antonio Oeste	-40.733	-64.933
N.darwini 10	N.darwini10			Royal Ontario Museum	Chordata	Aves	Tinamiformes	Tinamidae		Nothura	Nothura darwinii				S	I						16-Apr-2005		Argentina	Rio Negro			San Antonio Oeste	-40.733	-64.933
LGEMA-10237	247		LGEMA	Universidade de Sao Paulo, Departamento de Botanica	Chordata	Aves	Caprimulgiformes	Nyctibiidae		Nyctibius	Nyctibius griseus													Brazil	Para			Agropalma, Moju	-1.88	-48.785
LGEMA-97	364			Universidade de Sao Paulo, Departamento de Botanica	Chordata	Aves	Caprimulgiformes	Nyctibiidae		Nyctibius	Nyctibius griseus													Brazil	Piaui			PN Serra das Confusoes	-8.885	-43.455
DOT 7368	PAC 521			American Museum of Natural History, Ornithology Department	Chordata	Aves	Ciconiiformes	Ardeidae		Nycticorax	Nycticorax nycticorax
S20201	S20201			Royal Ontario Museum	Chordata	Aves	Ciconiiformes	Ardeidae		Nycticorax	Nycticorax nycticorax				S	A	nycticorax				A. J. Baker	06-Apr-1997		Brazil	Para			Salinas	-16.1	-42.15
LGEMA-9601		AMZ040		Universidade de Sao Paulo, Departamento de Botanica	Chordata	Aves	Caprimulgiformes	Caprimulgidae		Nyctidromus	Nyctidromus albicollis													Brazil	Amazonas			Estrada Manacapuru-Novo Airao Km75	-3.075	-60.82
3497	3497			Royal Ontario Museum	Chordata	Aves	Caprimulgiformes	Caprimulgidae		Nyctidromus	Nyctidromus albicollis			F	S	A						19-Jul-1994		Guyana		Potaro Siparuni Region		5 km SE Surama	4.06	-59.025
LGEMA-9754	AMZ193		LGEMA	Universidade de Sao Paulo, Departamento de Botanica	Chordata	Aves	Caprimulgiformes	Caprimulgidae		Nyctiprogne	Nyctiprogne leucopyga													Brazil	Amazonas			Estrada Manacapuru-Novo Airao Km75	-3.075	-60.82
LGEMA-3549	LGEMA-3549			Universidade de Sao Paulo, Departamento de Botanica	Chordata	Aves	Galbuliformes	Bucconidae		Nystalus	Nystalus chacuru
LGEMA-3603	109		LGEMA	Universidade de Sao Paulo, Departamento de Botanica	Chordata	Aves	Galbuliformes	Bucconidae		Nystalus	Nystalus maculatus													Brazil	Piaui			PN Serra das Confusoes	-8.885	-43.455
LGEMA-10187	195		LGEMA	Universidade de Sao Paulo, Departamento de Botanica	Chordata	Aves	Galbuliformes	Bucconidae		Nystalus	Nystalus striolatus													Brazil	Para			Agropalma, Moju	-1.88	-48.785
LGEMA-9889	AMZ328		LGEMA	Universidade de Sao Paulo, Departamento de Botanica	Chordata	Aves	Galliformes	Odontophoridae		Odontophorus	Odontophorus gujanensis													Brazil	Amazonas			Rio Unini, Barcelos	-3.13	-62.78
LGEMA-10198	206		LGEMA	Universidade de Sao Paulo, Departamento de Botanica	Chordata	Aves	Passeriformes	Tyrannidae		Onychorhynchus	Onychorhynchus coronatus													Brazil	Para			Agropalma, Moju	-1.88	-48.785
LGEMA-3244		MZUSP-76540		Universidade de Sao Paulo, Departamento de Botanica	Chordata	Aves	Passeriformes	Tyrannidae		Onychorhynchus	Onychorhynchus coronatus													Brazil	Maranhao			Horto Pompeia, Acailandia	-4.093	-47.299
324113	324113		FMNH	Field Museum of Natural History	Chordata	Aves	Apodiformes	Trochilidae		Oreonympha	Oreonympha nobilis			M	S		nobilis	skeleton				08-Dec-1985		Peru	Cuzco			Huacarpay	-13.579	-71.852	3300
LGEMA-3000	A0137		LGEMA	Universidade de Sao Paulo, Departamento de Botanica	Chordata	Aves	Passeriformes	Tyrannidae		Pachyramphus	Pachyramphus polychopterus			F										Brazil	Sao Paulo			Buri	-23.8	-48.59
LGEMA-2833	265			Universidade de Sao Paulo, Departamento de Botanica	Chordata	Aves	Passeriformes	Tyrannidae		Pachyramphus	Pachyramphus viridis													Brazil	Piaui			PN Serra das Confusoes	-8.885	-43.455
LGEMA-2183	32 ROP			Universidade de Sao Paulo, Departamento de Botanica	Chordata	Aves	Passeriformes	Emberizidae		Paroaria	Paroaria coronata													Brazil	Rio Grande do Sul			estrada Arroio Grande	-32.239	-53.091
LGEMA-2586	GSC55			Universidade de Sao Paulo, Departamento de Botanica	Chordata	Aves	Passeriformes	Emberizidae		Paroaria	Paroaria dominicana													Brazil	Bahia			Tanquinho	-12.496	-41.176	447
LGEMA-2614	GSC85			Universidade de Sao Paulo, Departamento de Botanica	Chordata	Aves	Passeriformes	Emberizidae		Paroaria	Paroaria dominicana													Brazil	Pernambuco			Trindade	-7.791	-40.284	499
LGEMA-2600	GSC70	MZUSP	LGEMA	Universidade de Sao Paulo, Departamento de Botanica	Chordata	Aves	Passeriformes	Emberizidae		Paroaria	Paroaria dominicana													Brazil	Piaui			Lagoa de Parnagua, Parnagua	-10.306	-44.696	323
P.albipennis41	P.albipennis41			Royal Ontario Museum	Chordata	Aves	Galliformes	Cracidae		Penelope	Penelope albipennis				S									Peru
P.albipennis26	P.albipennis26			Royal Ontario Museum	Chordata	Aves	Galliformes	Cracidae		Penelope	Penelope albipennis				S									Peru
P.albipennis24	P.albipennis24			Royal Ontario Museum	Chordata	Aves	Galliformes	Cracidae		Penelope	Penelope albipennis				S									Peru
P.albipennis14	P.albipennis14			Royal Ontario Museum	Chordata	Aves	Galliformes	Cracidae		Penelope	Penelope albipennis				S									Peru
P.albipennis12	P.albipennis12			Royal Ontario Museum	Chordata	Aves	Galliformes	Cracidae		Penelope	Penelope albipennis				S									Peru
P.albipenis 67	P.albipenis67		P.albipenis67	Royal Ontario Museum	Chordata	Aves	Galliformes	Cracidae		Penelope	Penelope albipennis				S									Peru
P.barbataB5	P.barbataB5			Royal Ontario Museum	Chordata	Aves	Galliformes	Cracidae		Penelope	Penelope barbata				S									Peru
LGEMA-9904	AMZ343		LGEMA	Universidade de Sao Paulo, Departamento de Botanica	Chordata	Aves	Galliformes	Cracidae		Penelope	Penelope jacquacu													Brazil	Amazonas			Rio Unini, Barcelos	-3.13	-62.78
P.jaquacuB8	P.jaquacuB8			Royal Ontario Museum	Chordata	Aves	Galliformes	Cracidae		Penelope	Penelope jacquacu				S									Peru
P.jaquacuB7	P.jaquacuB7			Royal Ontario Museum	Chordata	Aves	Galliformes	Cracidae		Penelope	Penelope jacquacu				S									Peru
1B-127	SCL I	155925		Royal Ontario Museum	Chordata	Aves	Passeriformes	Furnariidae		Phacellodomus	Phacellodomus rufifrons			F	S	I	ssp:sincipitalis	voucher type: skin			Lougheed, S C	19-Oct-1988		Argentina	Jujuy			Rio de Zora, Intersection Rta 34	-23.44	-64.42
MKP 2690	MKP 2690			Royal Ontario Museum	Chordata	Aves	Passeriformes	Thraupidae		Phaenicophilus	Phaenicophilus palmarum			M	S						Peck, M.	21-Apr-1996		Dominican Republic				Parque Nationale del Este	18.406	-68.805
LGEMA-2575	147			Universidade de Sao Paulo, Departamento de Botanica	Chordata	Aves	Passeriformes	Tyrannidae		Phaeomyias	Phaeomyias murina													Brazil	Piaui			PN Serra das Confusoes	-8.885	-43.455
LGEMA-40	ITA215			Universidade de Sao Paulo, Departamento de Botanica	Chordata	Aves	Apodiformes	Trochilidae		Phaethornis	Phaethornis eurynome													Brazil	Sao Paulo			Juquitiba	-23.928	-42.065
LGEMA-84		MZUSP-76537		Universidade de Sao Paulo, Departamento de Botanica	Chordata	Aves	Apodiformes	Trochilidae		Phaethornis	Phaethornis malaris													Brazil	Maranhao			Horto Pompeia, Acailandia	-4.093	-47.299
LGEMA-82		MZUSP-76528		Universidade de Sao Paulo, Departamento de Botanica	Chordata	Aves	Apodiformes	Trochilidae		Phaethornis	Phaethornis nattereri													Brazil	Maranhao			Porto Franco, Rio Itaueiras, afluente da margem direita do Rio Tocantins	-6.324	-47.397
LGEMA-10204	212		LGEMA	Universidade de Sao Paulo, Departamento de Botanica	Chordata	Aves	Apodiformes	Trochilidae		Phaethornis	Phaethornis ruber													Brazil	Para			Agropalma, Moju	-1.88	-48.785
LGEMA-9884	AMZ323		LGEMA	Universidade de Sao Paulo, Departamento de Botanica	Chordata	Aves	Apodiformes	Trochilidae		Phaethornis	Phaethornis ruber													Brazil	Amazonas			Rio Unini, Barcelos	-3.13	-62.78
LGEMA-9797		AMZ236		Universidade de Sao Paulo, Departamento de Botanica	Chordata	Aves	Apodiformes	Trochilidae		Phaethornis	Phaethornis ruber													Brazil	Amazonas			Rio Unini, Barcelos	-3.13	-62.78
LGEMA-19	16			Universidade de Sao Paulo, Departamento de Botanica	Chordata	Aves	Apodiformes	Trochilidae		Phaethornis	Phaethornis superciliosus				S							16-Dec-1997		Brazil	Mato Grosso			Fazenda Ipe, Vila Rica	-9.967	-50.951	219
LGEMA-10002	AMZ441		LGEMA	Universidade de Sao Paulo, Departamento de Botanica	Chordata	Aves	Apodiformes	Trochilidae		Phaethornis	Phaethornis superciliosus													Brazil	Amazonas			Rio Araca, Barcelos	-0.217	-63.04
LGEMA-29		MZUSP-970308		Universidade de Sao Paulo, Departamento de Botanica	Chordata	Aves	Apodiformes	Trochilidae		Phaethornis	Phaethornis superciliosus													Brazil	Mato Grosso			Aripuana	-9.18	-60.63
LGEMA-22	110			Universidade de Sao Paulo, Departamento de Botanica	Chordata	Aves	Apodiformes	Trochilidae		Phaethornis	Phaethornis superciliosus													Brazil	Mato Grosso			Juruena	-10.315	-58.49
1B-2891	1B-2891	160041		Royal Ontario Museum	Chordata	Aves	Pelecaniformes	Phalacrocoracidae		Phalacrocorax	Phalacrocorax atriceps			F	S	I	ssp:albiventer	voucher kind: skin; skeleton				01-Mar-1998		Argentina	Rio Negro			Las Grutas	-40.453	-64.53
LGEMA-2418	A0064			Universidade de Sao Paulo, Departamento de Botanica	Chordata	Aves	Passeriformes	Furnariidae		Philydor	Philydor atricapillus													Brazil	Sao Paulo			Juquitiba	-23.928	-42.065
LGEMA-568	115			Universidade de Sao Paulo, Departamento de Botanica	Chordata	Aves	Passeriformes	Furnariidae		Philydor	Philydor erythrocercum													Brazil	Mato Grosso			Juruena	-10.315	-58.49
LGEMA-497	970266			Universidade de Sao Paulo, Departamento de Botanica	Chordata	Aves	Passeriformes	Furnariidae		Philydor	Philydor ruficaudatum													Brazil	Mato Grosso			Aripuana	-9.18	-60.63
LGEMA-9598	AMZ037		LGEMA	Universidade de Sao Paulo, Departamento de Botanica	Chordata	Aves	Passeriformes	Thamnophilidae		Phlegopsis	Phlegopsis erythroptera													Brazil	Amazonas			Estrada Manacapuru-Novo Airao Km75	-3.075	-60.82
LGEMA-2116	1			Universidade de Sao Paulo, Departamento de Botanica	Chordata	Aves	Passeriformes	Thamnophilidae		Phlegopsis	Phlegopsis nigromaculata													Brazil	Para			Jacareacanga	-6.021	-57.823
LGEMA-518	41			Universidade de Sao Paulo, Departamento de Botanica	Chordata	Aves	Passeriformes	Thamnophilidae		Phlegopsis	Phlegopsis nigromaculata													Brazil	Mato Grosso			Pontes, Lacerda e Vila Bela da Santissima Trindade	-15.205	-59.664
LGEMA-9612	AMZ051		LGEMA	Universidade de Sao Paulo, Departamento de Botanica	Chordata	Aves	Passeriformes	Cotingidae		Phoenicircus	Phoenicircus nigricollis													Brazil	Amazonas			Estrada Manacapuru-Novo Airao Km75	-3.075	-60.82
LGEMA-2446	A0009			Universidade de Sao Paulo, Departamento de Botanica	Chordata	Aves	Passeriformes	Tyrannidae		Phyllomyias	Phyllomyias fasciatus													Brazil	Sao Paulo			Piedade	-23.711	-47.419
LGEMA-9564	AMZ003		LGEMA	Universidade de Sao Paulo, Departamento de Botanica	Chordata	Aves	Passeriformes	Tyrannidae		Phyllomyias	Phyllomyias griseiceps													Brazil	Amazonas			Estrada Manacapuru-Novo Airao Km75	-3.075	-60.82
LGEMA-2176	24 ROP			Universidade de Sao Paulo, Departamento de Botanica	Chordata	Aves	Passeriformes	Tyrannidae		Phylloscartes	Phylloscartes ventralis													Brazil	Rio Grande do Sul			Arroio do Padre/Pelotas, Colonia Cerrito	-31.367	-52.383
LGEMA-212	970058			Universidade de Sao Paulo, Departamento de Botanica	Chordata	Aves	Cuculiformes	Cuculidae		Piaya	Piaya cayana													Brazil	Mato Grosso			Aripuana	-9.18	-60.63
LGEMA-219	19			Universidade de Sao Paulo, Departamento de Botanica	Chordata	Aves	Cuculiformes	Cuculidae		Piaya	Piaya cayana													Brazil	Piaui			PN Serra das Confusoes	-8.885	-43.455
LGEMA-211	970002			Universidade de Sao Paulo, Departamento de Botanica	Chordata	Aves	Cuculiformes	Cuculidae		Piaya	Piaya melanogaster													Brazil	Mato Grosso			Aripuana	-9.18	-60.63
LGEMA-9666	AMZ105		LGEMA	Universidade de Sao Paulo, Departamento de Botanica	Chordata	Aves	Cuculiformes	Cuculidae		Piaya	Piaya melanogaster													Brazil	Amazonas			Estrada Manacapuru-Novo Airao Km75	-3.075	-60.82
LGEMA-3614	270		LGEMA	Universidade de Sao Paulo, Departamento de Botanica	Chordata	Aves	Piciformes	Picidae		Piculus	Piculus chrysochloros													Brazil	Piaui			PN Serra das Confusoes	-8.885	-43.455
LGEMA-9856		AMZ295		Universidade de Sao Paulo, Departamento de Botanica	Chordata	Aves	Piciformes	Picidae		Piculus	Piculus flavigula													Brazil	Amazonas			Rio Unini, Barcelos	-3.13	-62.78
LGEMA-9638	AMZ077		LGEMA	Universidade de Sao Paulo, Departamento de Botanica	Chordata	Aves	Piciformes	Picidae		Picumnus	Picumnus lafresnayi													Brazil	Amazonas			Estrada Manacapuru-Novo Airao Km75	-3.075	-60.82
LGEMA-3601	36		LGEMA	Universidade de Sao Paulo, Departamento de Botanica	Chordata	Aves	Piciformes	Picidae		Picumnus	Picumnus pygmaeus													Brazil	Piaui			PN Serra das Confusoes	-8.885	-43.455
LGEMA-3531	ITA284			Universidade de Sao Paulo, Departamento de Botanica	Chordata	Aves	Piciformes	Picidae		Picumnus	Picumnus temminckii													Brazil	Parana			Venceslau Bras	-23.847	-49.795
LGEMA-9604	AMZ043		LGEMA	Universidade de Sao Paulo, Departamento de Botanica	Chordata	Aves	Passeriformes	Pipridae		Pipra	Pipra cornuta				S									Brazil	Amazonas			Estrada Manacapuru-Novo Airao Km75	-3.075	-60.82
LGEMA-9874	AMZ313		LGEMA	Universidade de Sao Paulo, Departamento de Botanica	Chordata	Aves	Passeriformes	Pipridae		Pipra	Pipra erythrocephala													Brazil	Amazonas			Rio Unini, Barcelos	-3.13	-62.78
LGEMA-533	LGEMA-533		LGEMA	Universidade de Sao Paulo, Departamento de Botanica	Chordata	Aves	Passeriformes	Pipridae		Pipra	Pipra fasciicauda			F	S									Brazil	Mato Grosso			Pontes, Lacerda e Vila Bela da Santissima Trindade	-15.205	-59.664
LGEMA-473	970076			Universidade de Sao Paulo, Departamento de Botanica	Chordata	Aves	Passeriformes	Pipridae		Pipra	Pipra rubrocapilla													Brazil	Mato Grosso			Aripuana	-9.18	-60.63
LGEMA-9683	AMZ122		LGEMA	Universidade de Sao Paulo, Departamento de Botanica	Chordata	Aves	Passeriformes	Pipridae		Piprites	Piprites chloris													Brazil	Amazonas			Estrada Manacapuru-Novo Airao Km75	-3.075	-60.82
LGEMA-475	970196		LGEMA	Universidade de Sao Paulo, Departamento de Botanica	Chordata	Aves	Passeriformes	Pipridae		Piprites	Piprites chloris			F	S									Brazil	Mato Grosso			Aripuana	-9.18	-60.63
LGEMA-476	970236			Universidade de Sao Paulo, Departamento de Botanica	Chordata	Aves	Passeriformes	Pipridae		Piprites	Piprites chloris													Brazil	Mato Grosso			Aripuana	-9.18	-60.63
LGEMA-2795	180			Universidade de Sao Paulo, Departamento de Botanica	Chordata	Aves	Passeriformes	Thraupidae		Piranga	Piranga flava													Brazil	Piaui			PN Serra das Confusoes	-8.885	-43.455
LGEMA-2212	302	MZUSP	LGEMA	Universidade de Sao Paulo, Departamento de Botanica	Chordata	Aves	Passeriformes	Tyrannidae		Pitangus	Pitangus sulphuratus													Brazil	Piaui			PN Serra das Confusoes	-8.885	-43.455
LGEMA-10240	250		LGEMA	Universidade de Sao Paulo, Departamento de Botanica	Chordata	Aves	Passeriformes	Tyrannidae		Pitangus	Pitangus sulphuratus													Brazil	Para			Agropalma, Moju	-1.88	-48.785
LGEMA-9573	AMZ012		LGEMA	Universidade de Sao Paulo, Departamento de Botanica	Chordata	Aves	Passeriformes	Thamnophilidae		Pithys	Pithys albifrons													Brazil	Amazonas			Estrada Manacapuru-Novo Airao Km75	-3.075	-60.82
LGEMA-9599	AMZ038		LGEMA	Universidade de Sao Paulo, Departamento de Botanica	Chordata	Aves	Passeriformes	Thamnophilidae		Pithys	Pithys albifrons													Brazil	Amazonas			Estrada Manacapuru-Novo Airao Km75	-3.075	-60.82
3503	3503			Royal Ontario Museum	Chordata	Aves	Passeriformes	Thamnophilidae		Pithys	Pithys albifrons			M	S	A						19-Jul-1994		Guyana		Potaro Siparuni Region		5 km SE Surama	4.06	-59.025
3502	3502			Royal Ontario Museum	Chordata	Aves	Passeriformes	Thamnophilidae		Pithys	Pithys albifrons			F	S	A						19-Jul-1994		Guyana		Potaro Siparuni Region		5 km SE Surama	4.06	-59.025
LGEMA-1755	6 ROP		LGEMA	Universidade de Sao Paulo, Departamento de Botanica	Chordata	Aves	Passeriformes	Tyrannidae		Platyrinchus	Platyrinchus mystaceus													Brazil	Rio de Janeiro			P.N. Itatiaia	-23.797	-45.979	775
LGEMA-558	88			Universidade de Sao Paulo, Departamento de Botanica	Chordata	Aves	Passeriformes	Tyrannidae		Platyrinchus	Platyrinchus saturatus													Brazil	Mato Grosso			Juruena	-10.315	-58.49
LGEMA-1161	ITA189			Universidade de Sao Paulo, Departamento de Botanica	Chordata	Aves	Passeriformes	Tyrannidae		Poecilotriccus	Poecilotriccus plumbeiceps													Brazil	Sao Paulo			Juquitiba	-23.928	-42.065
LGEMA-2124	1			Universidade de Sao Paulo, Departamento de Botanica	Chordata	Aves	Passeriformes	Tyrannidae		Poecilotriccus	Poecilotriccus senex													Brazil	Para			Jacareacanga	-6.021	-57.823
LGEMA-2115	1			Universidade de Sao Paulo, Departamento de Botanica	Chordata	Aves	Passeriformes	Polioptilidae		Polioptila	Polioptila guianensis													Brazil	Para			Jacareacanga	-6.021	-57.823
LGEMA-2721	44			Universidade de Sao Paulo, Departamento de Botanica	Chordata	Aves	Passeriformes	Polioptilidae		Polioptila	Polioptila plumbea													Brazil	Piaui			PN Serra das Confusoes	-8.885	-43.455
LGEMA-68	255		LGEMA	Universidade de Sao Paulo, Departamento de Botanica	Chordata	Aves	Apodiformes	Trochilidae		Polyerata	Polyerata fimbriata				S							25-Jan-2005		Brazil	Piaui			PN Serra das Confusoes	-8.885	-43.455
LGEMA-2175	23 ROP			Universidade de Sao Paulo, Departamento de Botanica	Chordata	Aves	Passeriformes	Emberizidae		Poospiza	Poospiza lateralis													Brazil	Rio Grande do Sul			Arroio do Padre/Pelotas, Colonia Cerrito	-31.367	-52.383
G39079	G39079			Royal Ontario Museum	Chordata	Aves	Gruiformes	Rallidae		Porzana	Porzana spiloptera				S						Peck, M K: Baker, A J	04-May-1999		Brazil	Rio Grande do Sul			Lagoa do Peixe	-31.242	-51.064
G39077	G39077			Royal Ontario Museum	Chordata	Aves	Gruiformes	Rallidae		Porzana	Porzana spiloptera				S						Peck, M K: Baker, A J	04-May-1999		Brazil	Rio Grande do Sul			Lagoa do Peixe	-31.242	-51.064
LGEMA-9707	AMZ146		LGEMA	Universidade de Sao Paulo, Departamento de Botanica	Chordata	Aves	Passeriformes	Hirundinidae		Progne	Progne tapera													Brazil	Amazonas			Estrada Manacapuru-Novo Airao Km75	-3.075	-60.82
LGEMA-9665	AMZ104		LGEMA	Universidade de Sao Paulo, Departamento de Botanica	Chordata	Aves	Passeriformes	Icteridae		Psarocolius	Psarocolius viridis													Brazil	Amazonas			Estrada Manacapuru-Novo Airao Km75	-3.075	-60.82
LGEMA-2991	A0122			Universidade de Sao Paulo, Departamento de Botanica	Chordata	Aves	Passeriformes	Rhinocryptidae		Psilorhamphus	Psilorhamphus guttatus													Brazil	Sao Paulo			Buri	-23.8	-48.59
LGEMA-9862	AMZ301		LGEMA	Universidade de Sao Paulo, Departamento de Botanica	Chordata	Aves	Gruiformes	Psophiidae		Psophia	Psophia leucoptera						ochroptera							Brazil	Amazonas			Rio Unini, Barcelos	-3.13	-62.78
LGEMA-10186	194			Universidade de Sao Paulo, Departamento de Botanica	Chordata	Aves	Piciformes	Ramphastidae		Pteroglossus	Pteroglossus bitorquatus													Brazil	Para			Moju, Agropalma	-2.618	-48.78	51
LGEMA-3291	970246		LGEMA	Universidade de Sao Paulo, Departamento de Botanica	Chordata	Aves	Piciformes	Ramphastidae		Pteroglossus	Pteroglossus bitorquatus													Brazil	Mato Grosso			Aripuana	-9.18	-60.63
LGEMA-3252		MZUSP-76549		Universidade de Sao Paulo, Departamento de Botanica	Chordata	Aves	Passeriformes	Thamnophilidae		Pyriglena	Pyriglena leuconota													Brazil	Maranhao			Porto Franco, Rio Itaueiras, afluente da margem direita do Rio Tocantins	-6.324	-47.397
LGEMA-3270	104		LGEMA	Universidade de Sao Paulo, Departamento de Botanica	Chordata	Aves	Passeriformes	Thamnophilidae		Pyriglena	Pyriglena leuconota													Brazil	Para			Tailandia	-2.947	-48.953
LGEMA-2071	050030		LGEMA	Universidade de Sao Paulo, Departamento de Botanica	Chordata	Aves	Passeriformes	Thamnophilidae		Pyriglena	Pyriglena leucoptera													Brazil	Sao Paulo	Piracicaba		Fazenda Barreiro Rico	-22.686	-48.127
LGEMA-1354	ITA270		LGEMA	Universidade de Sao Paulo, Departamento de Botanica	Chordata	Aves	Passeriformes	Thraupidae		Pyrrhocoma	Pyrrhocoma ruficeps			M										Brazil	Parana			Venceslau Bras	-23.847	-49.795
LGEMA-10225	233		LGEMA	Universidade de Sao Paulo, Departamento de Botanica	Chordata	Aves	Passeriformes	Cotingidae		Querula	Querula purpurata													Brazil	Para			Agropalma, Moju	-1.88	-48.785
3513	3513			Royal Ontario Museum	Chordata	Aves	Passeriformes	Cotingidae		Querula	Querula purpurata			M	S	A						21-Jul-1994		Guyana		Potaro Siparuni Region		5 km SE Surama	4.06	-59.025
1B-1004	1B-1004	157310		Royal Ontario Museum	Chordata	Aves	Piciformes	Ramphastidae		Ramphastos	Ramphastos toco			F	S	A	captive	voucher kind: skeleton				27-Jan-1992
LGEMA-3292	970248		LGEMA	Universidade de Sao Paulo, Departamento de Botanica	Chordata	Aves	Piciformes	Ramphastidae		Ramphastos	Ramphastos vitellinus													Brazil	Mato Grosso			Aripuana	-9.18	-60.63
LGEMA-10320	A0150			Universidade de Sao Paulo, Departamento de Botanica	Chordata	Aves	Apodiformes	Trochilidae		Ramphodon	Ramphodon naevius													Brazil	Sao Paulo			Praias de Boraceia e Guaratuba, Bertioga	-23.753	-45.893
MKP 2757	MKP 2757			Royal Ontario Museum	Chordata	Aves	Struthioniformes	Rheidae		Rhea	Rhea americana				S							20-Sep-1996		Argentina	Rio Negro			Viedma	-40.8	-63
MKP 2756	MKP 2756			Royal Ontario Museum	Chordata	Aves	Struthioniformes	Rheidae		Rhea	Rhea americana				S							20-Sep-1996		Argentina	Rio Negro			Viedma	-40.8	-63
MKP 2749	MKP 2749			Royal Ontario Museum	Chordata	Aves	Struthioniformes	Rheidae		Rhea	Rhea pennata				S							04-Nov-1996		Argentina	Rio Negro			General Roca	-39.036	-67.507
MKP 2747	MKP 2747			Royal Ontario Museum	Chordata	Aves	Struthioniformes	Rheidae		Rhea	Rhea pennata				S							04-Nov-1996		Argentina	Rio Negro			General Roca	-39.036	-67.507
MKP 2745	MKP 2745			Royal Ontario Museum	Chordata	Aves	Struthioniformes	Rheidae		Rhea	Rhea pennata				S							04-Nov-1996		Argentina	Rio Negro			General Roca	-39.036	-65.507
LGEMA-2110	3			Universidade de Sao Paulo, Departamento de Botanica	Chordata	Aves	Passeriformes	Thamnophilidae		Rhegmatorhina	Rhegmatorhina sp.													Brazil	Para			Jacareacanga	-6.021	-57.823
LGEMA-437	970160		LGEMA	Universidade de Sao Paulo, Departamento de Botanica	Chordata	Aves	Passeriformes	Tyrannidae		Rhytipterna	Rhytipterna simplex				S									Brazil	Mato Grosso			Aripuana	-9.18	-60.63
LGEMA-562	111			Universidade de Sao Paulo, Departamento de Botanica	Chordata	Aves	Passeriformes	Tyrannidae		Rhytipterna	Rhytipterna simplex						Rhytipterna hispidus							Brazil	Mato Grosso			Juruena	-10.315	-58.49
LGEMA-10234	244		LGEMA	Universidade de Sao Paulo, Departamento de Botanica	Chordata	Aves	Passeriformes	Cardinalidae		Saltator	Saltator grossus													Brazil	Para			Agropalma, Moju	-1.88	-48.785
LGEMA-9925	AMZ364		LGEMA	Universidade de Sao Paulo, Departamento de Botanica	Chordata	Aves	Passeriformes	Cardinalidae		Saltator	Saltator maximus													Brazil	Amazonas			Rio Unini, Barcelos	-3.13	-62.78
LGEMA-3265		MZUSP-76560	LGEMA	Universidade de Sao Paulo, Departamento de Botanica	Chordata	Aves	Passeriformes	Cardinalidae		Saltator	Saltator maximus			M				Skin						Brazil	Tocantins			`Mata Virgem`, Palmeiras do Tocantins	-6.614	-47.547
LGEMA-354	321			Universidade de Sao Paulo, Departamento de Botanica	Chordata	Aves	Falconiformes	Cathartidae		Sarcoramphus	Sarcoramphus papa													Brazil	Piaui			Urucui-Una	-7.235	-44.553
LGEMA-9645	AMZ084		LGEMA	Universidade de Sao Paulo, Departamento de Botanica	Chordata	Aves	Passeriformes	Pipridae		Schiffornis	Schiffornis turdina													Brazil	Amazonas			Estrada Manacapuru-Novo Airao Km75	-3.075	-60.82
LGEMA-547	16		LGEMA	Universidade de Sao Paulo, Departamento de Botanica	Chordata	Aves	Passeriformes	Pipridae		Schiffornis	Schiffornis turdina				S									Brazil	Mato Grosso			Juruena	-10.315	-58.49
LGEMA-2084	50044			Universidade de Sao Paulo, Departamento de Botanica	Chordata	Aves	Passeriformes	Pipridae		Schiffornis	Schiffornis virescens													Brazil	Sao Paulo	Piracicaba		Fazenda Barreiro Rico	-22.686	-48.127
LGEMA-494	970186			Universidade de Sao Paulo, Departamento de Botanica	Chordata	Aves	Passeriformes	Furnariidae		Sclerurus	Sclerurus rufigularis													Brazil	Mato Grosso			Aripuana	-9.18	-60.63
1B-2970	1B-2970	160171	ROM	Royal Ontario Museum	Chordata	Aves	Piciformes	Ramphastidae		Selenidera	Selenidera maculirostris			M	S	A		voucher: skeleton				30-Oct-1997
LGEMA-2064	50023			Universidade de Sao Paulo, Departamento de Botanica	Chordata	Aves	Passeriformes	Furnariidae		Sittasomus	Sittasomus griseicapillus													Brazil	Sao Paulo	Piracicaba		Fazenda Barreiro Rico	-22.686	-48.127
LGEMA-2706	23			Universidade de Sao Paulo, Departamento de Botanica	Chordata	Aves	Passeriformes	Furnariidae		Sittasomus	Sittasomus griseicapillus													Brazil	Piaui			PN Serra das Confusoes	-8.885	-43.455
LGEMA-500	970230			Universidade de Sao Paulo, Departamento de Botanica	Chordata	Aves	Passeriformes	Thamnophilidae		Skutchia	Skutchia borbae													Brazil	Mato Grosso			Aripuana	-9.18	-60.63
LGEMA-442	970014			Universidade de Sao Paulo, Departamento de Botanica	Chordata	Aves	Passeriformes	Thamnophilidae		Skutchia	Skutchia borbae													Brazil	Mato Grosso			Aripuana	-9.18	-60.63
LGEMA-2997	A0132		LGEMA	Universidade de Sao Paulo, Departamento de Botanica	Chordata	Aves	Passeriformes	Emberizidae		Sporophila	Sporophila bouvreuil			M										Brazil	Sao Paulo			Buri	-23.8	-48.59
LGEMA-10302	MMC29			Universidade de Sao Paulo, Departamento de Botanica	Chordata	Aves	Passeriformes	Emberizidae		Sporophila	Sporophila caerulescens				S		originally identified as S. nigricollis	::taxonomy:originally identified as S. nigricollis::endTaxonomy:				28-Feb-2005		Brazil	Minas Gerais			Sitio Capao Queimado, Cachoeira da Prata	-19.591	-44.599
LGEMA-3001	A0138			Universidade de Sao Paulo, Departamento de Botanica	Chordata	Aves	Passeriformes	Emberizidae		Sporophila	Sporophila collaris													Brazil	Sao Paulo			Buri	-23.8	-48.59
LGEMA-2687	403		LGEMA	Universidade de Sao Paulo, Departamento de Botanica	Chordata	Aves	Passeriformes	Emberizidae		Sporophila	Sporophila lineola													Brazil	Piaui			PN Serra das Confusoes	-8.885	-43.455
LGEMA-2408	A0051			Universidade de Sao Paulo, Departamento de Botanica	Chordata	Aves	Passeriformes	Emberizidae		Sporophila	Sporophila nigricollis				S		originally identified as S. caerulescens	::taxonomy:originally identified as S. caerulescens::endTaxonomy:						Brazil	Sao Paulo			Juquitiba	-23.928	-42.065
LGEMA-2688	528		LGEMA	Universidade de Sao Paulo, Departamento de Botanica	Chordata	Aves	Passeriformes	Emberizidae		Sporophila	Sporophila nigricollis													Brazil	Piaui			PN Serra das Confusoes	-8.885	-43.455
LGEMA-65	140			Universidade de Sao Paulo, Departamento de Botanica	Chordata	Aves	Apodiformes	Trochilidae		Stephanoxis	Stephanoxis lalandi													Brazil	Sao Paulo			EE Bananal	-23.406	-48.348
LGEMA-10202	210		LGEMA	Universidade de Sao Paulo, Departamento de Botanica	Chordata	Aves	Passeriformes	Furnariidae		Synallaxis	Synallaxis gujanensis													Brazil	Para			Agropalma, Moju	-1.88	-48.785
LGEMA-2054	050013		LGEMA	Universidade de Sao Paulo, Departamento de Botanica	Chordata	Aves	Passeriformes	Furnariidae		Synallaxis	Synallaxis ruficapilla													Brazil	Sao Paulo	Piracicaba		Fazenda Barreiro Rico	-22.686	-48.127
LGEMA-564	12		LGEMA	Universidade de Sao Paulo, Departamento de Botanica	Chordata	Aves	Passeriformes	Furnariidae		Synallaxis	Synallaxis rutilans			M										Brazil	Mato Grosso			Juruena	-10.315	-58.49
LGEMA-9994	AMZ433		LGEMA	Universidade de Sao Paulo, Departamento de Botanica	Chordata	Aves	Passeriformes	Furnariidae		Synallaxis	Synallaxis rutilans													Brazil	Amazonas			Rio Araca, Barcelos	-0.217	-63.04
LGEMA-495	970192			Universidade de Sao Paulo, Departamento de Botanica	Chordata	Aves	Passeriformes	Furnariidae		Synallaxis	Synallaxis rutilans													Brazil	Mato Grosso			Aripuana	-9.18	-60.63
LGEMA-3230		MZUSP-76518	LGEMA	Universidade de Sao Paulo, Departamento de Botanica	Chordata	Aves	Passeriformes	Furnariidae		Synallaxis	Synallaxis rutilans							Carcass						Brazil	Maranhao			Horto Pompeia, Acailandia	-4.093	-47.299
LGEMA-2751	123		LGEMA	Universidade de Sao Paulo, Departamento de Botanica	Chordata	Aves	Passeriformes	Furnariidae		Synallaxis	Synallaxis scutata													Brazil	Piaui			PN Serra das Confusoes	-8.885	-43.455
LGEMA-10581	LGEMA 10581	MZUSP-76542	LGEMA	Universidade de Sao Paulo, Departamento de Botanica	Chordata	Aves	Passeriformes	Furnariidae		Syndactyla	Syndactyla rufosuperciliata			M	S									Brazil
LGEMA-9837	AMZ276		LGEMA	Universidade de Sao Paulo, Departamento de Botanica	Chordata	Aves	Passeriformes	Hirundinidae		Tachycineta	Tachycineta albiventer													Brazil	Amazonas			Rio Unini, Barcelos	-3.13	-62.78
1B-4439	1B-4439	101593		Royal Ontario Museum	Chordata	Aves	Anseriformes	Anatidae		Tachyeres	Tachyeres patachonicus			M	S	A		voucher kind: Skeleton; wing			via Baker, A J	01-Dec-1984		Argentina	Chubut			Punta Tafor	-45.03	-66.16
AJB 4471	AJB 4471			Royal Ontario Museum	Chordata	Aves	Anseriformes	Anatidae		Tachyeres	Tachyeres pteneres				S							01-Dec-1984		Argentina
AJB 4470	AJB 4470			Royal Ontario Museum	Chordata	Aves	Anseriformes	Anatidae		Tachyeres	Tachyeres pteneres			F	S	A						01-Dec-1984		Argentina
LGEMA-1400	10		LGEMA	Universidade de Sao Paulo, Departamento de Botanica	Chordata	Aves	Passeriformes	Thraupidae		Tachyphonus	Tachyphonus coronatus							Strange plumage, juvenile?						Argentina	Misiones			Campo San Juan	-26.959	-54.195
LGEMA-9633	AMZ072		LGEMA	Universidade de Sao Paulo, Departamento de Botanica	Chordata	Aves	Passeriformes	Thraupidae		Tachyphonus	Tachyphonus cristatus													Brazil	Amazonas			Estrada Manacapuru-Novo Airao Km75	-3.075	-60.82
LGEMA-9817	AMZ256		LGEMA	Universidade de Sao Paulo, Departamento de Botanica	Chordata	Aves	Passeriformes	Thraupidae		Tachyphonus	Tachyphonus surinamus													Brazil	Amazonas			Rio Unini, Barcelos	-3.13	-62.78
LGEMA-3258		MZUSP-76522	LGEMA	Universidade de Sao Paulo, Departamento de Botanica	Chordata	Aves	Passeriformes	Tyrannidae		Taeniotriccus	Taeniotriccus andrei			M				Skin						Brazil	Maranhao			Horto Pompeia, Acailandia	-4.093	-47.299
LGEMA-2406	A0049			Universidade de Sao Paulo, Departamento de Botanica	Chordata	Aves	Passeriformes	Thraupidae		Tangara	Tangara seledon													Brazil	Sao Paulo			Juquitiba	-23.928	-42.065
LGEMA-2835	268			Universidade de Sao Paulo, Departamento de Botanica	Chordata	Aves	Passeriformes	Thamnophilidae		Taraba	Taraba major													Brazil	Piaui			PN Serra das Confusoes	-8.885	-43.455
LGEMA-434	970098			Universidade de Sao Paulo, Departamento de Botanica	Chordata	Aves	Passeriformes	Tyrannidae		Terenotriccus	Terenotriccus erythrurus													Brazil	Mato Grosso			Aripuana	-9.18	-60.63
LGEMA-9967	AMZ406		LGEMA	Universidade de Sao Paulo, Departamento de Botanica	Chordata	Aves	Passeriformes	Tyrannidae		Terenotriccus	Terenotriccus erythrurus													Brazil	Amazonas			Rio Araca, Barcelos	-0.217	-63.04
LGEMA-10216	224		LGEMA	Universidade de Sao Paulo, Departamento de Botanica	Chordata	Aves	Apodiformes	Trochilidae		Thalurania	Thalurania furcata													Brazil	Para			Agropalma, Moju	-1.88	-48.785
LGEMA-33	65			Universidade de Sao Paulo, Departamento de Botanica	Chordata	Aves	Apodiformes	Trochilidae		Thalurania	Thalurania furcata				S							01-Jul-1997		Brazil	Mato Grosso			Pontes e Lacerda	-15.234	-59.331
LGEMA-32	63			Universidade de Sao Paulo, Departamento de Botanica	Chordata	Aves	Apodiformes	Trochilidae		Thalurania	Thalurania furcata													Brazil	Mato Grosso			Pontes e Lacerda	-15.234	-59.331
LGEMA-10213	221			Universidade de Sao Paulo, Departamento de Botanica	Chordata	Aves	Apodiformes	Trochilidae		Thalurania	Thalurania furcata													Brazil	Para			Agropalma, Moju	-1.88	-48.785
LGEMA-10214	222			Universidade de Sao Paulo, Departamento de Botanica	Chordata	Aves	Apodiformes	Trochilidae		Thalurania	Thalurania furcata													Brazil	Para			Agropalma, Moju	-1.88	-48.785
LGEMA-38	ITA161		LGEMA	Universidade de Sao Paulo, Departamento de Botanica	Chordata	Aves	Apodiformes	Trochilidae		Thalurania	Thalurania glaucopis				S							22-May-2002		Brazil	Sao Paulo			Juquitiba	-23.928	-42.065
LGEMA-9959		AMZ398		Universidade de Sao Paulo, Departamento de Botanica	Chordata	Aves	Passeriformes	Thamnophilidae		Thamnomanes	Thamnomanes caesius													Brazil	Amazonas			Rio Araca, Barcelos	-0.217	-63.04
LGEMA-9576	AMZ015		LGEMA	Universidade de Sao Paulo, Departamento de Botanica	Chordata	Aves	Passeriformes	Thamnophilidae		Thamnomanes	Thamnomanes caesius													Brazil	Amazonas			Estrada Manacapuru-Novo Airao Km75	-3.075	-60.82
LGEMA-583	77			Universidade de Sao Paulo, Departamento de Botanica	Chordata	Aves	Passeriformes	Thamnophilidae		Thamnomanes	Thamnomanes caesius													Brazil	Mato Grosso			Juruena	-10.315	-58.49
LGEMA-9869		AMZ308		Universidade de Sao Paulo, Departamento de Botanica	Chordata	Aves	Passeriformes	Thamnophilidae		Thamnomanes	Thamnomanes caesius													Brazil	Amazonas			Rio Unini, Barcelos	-3.13	-62.78
3524	3524			Royal Ontario Museum	Chordata	Aves	Passeriformes	Thamnophilidae		Thamnomanes	Thamnomanes caesius			M	S	A						23-Jul-1994		Guyana		Potaro Siparuni Region		5 km SE Surama	4.06	-59.025
LGEMA-503	970044		LGEMA	Universidade de Sao Paulo, Departamento de Botanica	Chordata	Aves	Passeriformes	Thamnophilidae		Thamnomanes	Thamnomanes saturninus				S									Brazil	Mato Grosso			Aripuana	-9.18	-60.63
LGEMA-9895	AMZ324			Universidade de Sao Paulo, Departamento de Botanica	Chordata	Aves	Passeriformes	Thamnophilidae		Thamnophilus	Thamnophilus aethiops				S									Brazil	Amazonas			Rio Unini, Barcelos	-3.13	-62.78
LGEMA-3249		MZUSP-76546	LGEMA	Universidade de Sao Paulo, Departamento de Botanica	Chordata	Aves	Passeriformes	Thamnophilidae		Thamnophilus	Thamnophilus aethiops			M	S									Brazil	Maranhao			Horto Pompeia, Acailandia	-4.093	-47.299
LGEMA-9998		AMZ437		Universidade de Sao Paulo, Departamento de Botanica	Chordata	Aves	Passeriformes	Thamnophilidae		Thamnophilus	Thamnophilus aethiops													Brazil	Amazonas			Rio Araca, Barcelos	-0.217	-63.04
LGEMA-9670		AMZ109		Universidade de Sao Paulo, Departamento de Botanica	Chordata	Aves	Passeriformes	Thamnophilidae		Thamnophilus	Thamnophilus aethiops													Brazil	Amazonas			Estrada Manacapuru-Novo Airao Km75	-3.075	-60.82
LGEMA-10151	156		LGEMA	Universidade de Sao Paulo, Departamento de Botanica	Chordata	Aves	Passeriformes	Thamnophilidae		Thamnophilus	Thamnophilus aethiops													Brazil	Para			Agropalma, Moju	-1.88	-48.785
LGEMA-588	97			Universidade de Sao Paulo, Departamento de Botanica	Chordata	Aves	Passeriformes	Thamnophilidae		Thamnophilus	Thamnophilus aethiops													Brazil	Mato Grosso			Juruena	-10.315	-58.49
LGEMA-459	970118			Universidade de Sao Paulo, Departamento de Botanica	Chordata	Aves	Passeriformes	Thamnophilidae		Thamnophilus	Thamnophilus aethiops													Brazil	Mato Grosso			Aripuana	-9.18	-60.63
LGEMA-10150	155			Universidade de Sao Paulo, Departamento de Botanica	Chordata	Aves	Passeriformes	Thamnophilidae		Thamnophilus	Thamnophilus aethiops													Brazil	Para			Agropalma, Moju	-1.88	-48.785
LGEMA-9690	AMZ129		LGEMA	Universidade de Sao Paulo, Departamento de Botanica	Chordata	Aves	Passeriformes	Thamnophilidae		Thamnophilus	Thamnophilus amazonicus													Brazil	Amazonas			Estrada Manacapuru-Novo Airao Km75	-3.075	-60.82
LGEMA-2740	108		LGEMA	Universidade de Sao Paulo, Departamento de Botanica	Chordata	Aves	Passeriformes	Thamnophilidae		Thamnophilus	Thamnophilus doliatus													Brazil	Piaui			PN Serra das Confusoes	-8.885	-43.455
LGEMA-9883		AMZ322		Universidade de Sao Paulo, Departamento de Botanica	Chordata	Aves	Passeriformes	Thamnophilidae		Thamnophilus	Thamnophilus murinus													Brazil	Amazonas			Rio Unini, Barcelos	-3.13	-62.78
LGEMA-2700	13		LGEMA	Universidade de Sao Paulo, Departamento de Botanica	Chordata	Aves	Passeriformes	Thamnophilidae		Thamnophilus	Thamnophilus pelzelni				S									Brazil	Piaui			PN Serra das Confusoes	-8.885	-43.455
LGEMA-2405	A0048			Universidade de Sao Paulo, Departamento de Botanica	Chordata	Aves	Passeriformes	Thraupidae		Thraupis	Thraupis ornata													Brazil	Sao Paulo			Juquitiba	-23.928	-42.065
LGEMA-2852	294			Universidade de Sao Paulo, Departamento de Botanica	Chordata	Aves	Passeriformes	Thraupidae		Thraupis	Thraupis palmarum													Brazil	Piaui			PN Serra das Confusoes	-8.885	-43.455
LGEMA-2829	258			Universidade de Sao Paulo, Departamento de Botanica	Chordata	Aves	Passeriformes	Thraupidae		Thraupis	Thraupis sayaca													Brazil	Piaui			PN Serra das Confusoes	-8.885	-43.455
LGEMA-9982	AMZ421		LGEMA	Universidade de Sao Paulo, Departamento de Botanica	Chordata	Aves	Passeriformes	Troglodytidae		Thryothorus	Thryothorus coraya													Brazil	Amazonas			Rio Araca, Barcelos	-0.217	-63.04
LGEMA-10334	A0168		LGEMA	Universidade de Sao Paulo, Departamento de Botanica	Chordata	Aves	Passeriformes	Troglodytidae		Thryothorus	Thryothorus longirostris			F								06-Nov-2006		Brazil	Sao Paulo			Praias de Boraceia e Guaratuba, Bertioga	-23.753	-45.893
LGEMA-2709	26		LGEMA	Universidade de Sao Paulo, Departamento de Botanica	Chordata	Aves	Passeriformes	Troglodytidae		Thryothorus	Thryothorus longirostris													Brazil	Piaui			PN Serra das Confusoes	-8.885	-43.455
LGEMA-1358	ITA274		LGEMA	Universidade de Sao Paulo, Departamento de Botanica	Chordata	Aves	Passeriformes	Emberizidae		Tiaris	Tiaris fuliginosus			M										Brazil	Parana			Venceslau Bras	-23.847	-49.795
433037	433037		FMNH	Field Museum of Natural History	Chordata	Aves	Ciconiiformes	Ardeidae		Tigrisoma	Tigrisoma fasciatum			M	S		salmoni	voucher: skin				17-Oct-2001		Peru	Cuzco	Paucartambo		Consuelo, 15.9 km SW Pilcopata	-13.1	-71.286	1000
LGEMA-10063	AMZ502		LGEMA	Universidade de Sao Paulo, Departamento de Botanica	Chordata	Aves	Tinamiformes	Tinamidae		Tinamus	Tinamus major serralus						serralus							Brazil	Amazonas			Rio Araca, Barcelos	-0.217	-63.04
LGEMA-9657	AMZ096		LGEMA	Universidade de Sao Paulo, Departamento de Botanica	Chordata	Aves	Passeriformes	Tyrannidae		Tolmomyias	Tolmomyias assimilis													Brazil	Amazonas			Estrada Manacapuru-Novo Airao Km75	-3.075	-60.82
LGEMA-432	970006			Universidade de Sao Paulo, Departamento de Botanica	Chordata	Aves	Passeriformes	Tyrannidae		Tolmomyias	Tolmomyias assimilis				S									Brazil	Mato Grosso			Aripuana	-9.18	-60.63
LGEMA-9623	AMZ062		LGEMA	Universidade de Sao Paulo, Departamento de Botanica	Chordata	Aves	Passeriformes	Tyrannidae		Tolmomyias	Tolmomyias assimilis													Brazil	Amazonas			Estrada Manacapuru-Novo Airao Km75	-3.075	-60.82
LGEMA-2704	21		LGEMA	Universidade de Sao Paulo, Departamento de Botanica	Chordata	Aves	Passeriformes	Tyrannidae		Tolmomyias	Tolmomyias flaviventris													Brazil	Piaui			PN Serra das Confusoes	-8.885	-43.455
LGEMA-3256		MZUSP-76553	LGEMA	Universidade de Sao Paulo, Departamento de Botanica	Chordata	Aves	Passeriformes	Tyrannidae		Tolmomyias	Tolmomyias sulphurescens			M				Skin						Brazil	Tocantins			`Mata Virgem`, Palmeiras do Tocantins	-6.614	-47.547
389726	389726		FMNH	Field Museum of Natural History	Chordata	Aves	Apodiformes	Trochilidae		Topaza	Topaza pella			F	S		microrhynchus	skin and skeleton at Museu Goeldi				17-Nov-1986		Brazil	Rondonia			Cachoeira Nazare, W bank Rio Jiparana	-10.878	-61.947	100
LGEMA-10367	GSC102		LGEMA	Universidade de Sao Paulo, Departamento de Botanica	Chordata	Aves	Passeriformes	Thraupidae		Trichothraupis	Trichothraupis melanops													Argentina	Misiones			Paraje Maria Soledad, Dpto Gral Belgrano	-25.858	-53.984	304
331060	331060		FMNH	Field Museum of Natural History	Chordata	Aves	Apodiformes	Trochilidae		Trochilus	Trochilus polytmus			M	S		scitulus					09-May-1987		Jamaica		Surrey		Portland, Hollywell Pk.	18.125	-76.508	1270
AJB 4398	AJB 4398	149782		Royal Ontario Museum	Chordata	Aves	Passeriformes	Troglodytidae		Troglodytes	Troglodytes aedon			F	S	A	ssp:chilensis	voucher type: skin, skeleton			A. J. Baker	25-Nov-1984		Argentina	Tierra del Fuego	Antartida, e Islas del Atlantico Sur		Ushuaia	-54.48	-68.19
LGEMA-9554	31			Universidade de Sao Paulo, Departamento de Botanica	Chordata	Aves	Trogoniformes	Trogonidae		Trogon	Trogon curucui											01-Jul-1997		Brazil	Mato Grosso			Pontes e Lacerda	-15.234	-59.331
LGEMA-9561	175			Universidade de Sao Paulo, Departamento de Botanica	Chordata	Aves	Trogoniformes	Trogonidae		Trogon	Trogon curucui											25-Jan-2005		Brazil	Piaui			PN Serra das Confusoes	-8.885	-43.455
LGEMA-9553	30			Universidade de Sao Paulo, Departamento de Botanica	Chordata	Aves	Trogoniformes	Trogonidae		Trogon	Trogon curucui													Brazil	Mato Grosso			Pontes e Lacerda	-15.234	-59.331
LGEMA-9976	AMZ415		LGEMA	Universidade de Sao Paulo, Departamento de Botanica	Chordata	Aves	Trogoniformes	Trogonidae		Trogon	Trogon melanurus													Brazil	Amazonas			Rio Araca, Barcelos	-0.217	-63.04
LGEMA-9551	LGEMA-9551		LGEMA	Universidade de Sao Paulo, Departamento de Botanica	Chordata	Aves	Trogoniformes	Trogonidae		Trogon	Trogon melanurus											16-Dec-1997		Brazil	Mato Grosso			Fazenda Ipe, Vila Rica	-9.967	-50.951	219
LGEMA-9555	5			Universidade de Sao Paulo, Departamento de Botanica	Chordata	Aves	Trogoniformes	Trogonidae		Trogon	Trogon melanurus													Brazil	Mato Grosso			Pontes e Lacerda	-15.234	-59.331
LGEMA-9558	16		LGEMA	Universidade de Sao Paulo, Departamento de Botanica	Chordata	Aves	Trogoniformes	Trogonidae		Trogon	Trogon surrucura											19-Sep-2000		Brazil	Sao Paulo			EE Bananal	-23.406	-48.348
LGEMA-9813	AMZ252		LGEMA	Universidade de Sao Paulo, Departamento de Botanica	Chordata	Aves	Trogoniformes	Trogonidae		Trogon	Trogon violaceus													Brazil	Amazonas			Rio Unini, Barcelos	-3.13	-62.78
LGEMA-9550	LGEMA-9550		LGEMA	Universidade de Sao Paulo, Departamento de Botanica	Chordata	Aves	Trogoniformes	Trogonidae		Trogon	Trogon viridis											16-Dec-1997		Brazil	Mato Grosso			Fazenda Ipe, Vila Rica	-9.967	-50.951	219
LGEMA-9649	AMZ088		LGEMA	Universidade de Sao Paulo, Departamento de Botanica	Chordata	Aves	Trogoniformes	Trogonidae		Trogon	Trogon viridis													Brazil	Amazonas			Estrada Manacapuru-Novo Airao Km75	-3.075	-60.82
LGEMA-605	67			Universidade de Sao Paulo, Departamento de Botanica	Chordata	Aves	Passeriformes	Turdidae		Turdus	Turdus albicollis													Brazil	Mato Grosso			Juruena	-10.315	-58.49
AJB 4397	AJB 4397	149781		Royal Ontario Museum	Chordata	Aves	Passeriformes	Turdidae		Turdus	Turdus falcklandii			M	S	A	ssp:magellanicus	voucher type: skin, skeleton			A. J. Baker	25-Nov-1984		Argentina	Tierra del Fuego	Antartida, e Islas del Atlantico Sur		Ushuaia	-54.48	-68.19
LGEMA-3264		MZUSP-76559		Universidade de Sao Paulo, Departamento de Botanica	Chordata	Aves	Passeriformes	Turdidae		Turdus	Turdus leucomelas													Brazil	Tocantins			`Mata Virgem`, Palmeiras do Tocantins	-6.614	-47.547
LGEMA-2210	300	MZUSP	LGEMA	Universidade de Sao Paulo, Departamento de Botanica	Chordata	Aves	Passeriformes	Turdidae		Turdus	Turdus leucomelas													Brazil	Piaui			PN Serra das Confusoes	-8.885	-43.455
LGEMA-9782	AMZ221		LGEMA	Universidade de Sao Paulo, Departamento de Botanica	Chordata	Aves	Passeriformes	Turdidae		Turdus	Turdus leucomelas													Brazil	Amazonas			Rio Unini, Barcelos	-3.13	-62.78
LGEMA-9783	AMZ222			Universidade de Sao Paulo, Departamento de Botanica	Chordata	Aves	Passeriformes	Turdidae		Turdus	Turdus leucomelas													Brazil	Amazonas			Rio Unini, Barcelos	-3.13	-62.78
LGEMA-2806	209			Universidade de Sao Paulo, Departamento de Botanica	Chordata	Aves	Passeriformes	Turdidae		Turdus	Turdus leucomelas													Brazil	Piaui			PN Serra das Confusoes	-8.885	-43.455
LGEMA-409	18			Universidade de Sao Paulo, Departamento de Botanica	Chordata	Aves	Passeriformes	Turdidae		Turdus	Turdus leucomelas				S									Brazil	Mato Grosso			Fazenda Ipe, Vila Rica	-9.967	-50.951	219
LGEMA-2402	A0040		LGEMA	Universidade de Sao Paulo, Departamento de Botanica	Chordata	Aves	Passeriformes	Turdidae		Turdus	Turdus rufiventris			M										Brazil	Sao Paulo			Juquitiba	-23.928	-42.065
LGEMA-2819	237		LGEMA	Universidade de Sao Paulo, Departamento de Botanica	Chordata	Aves	Passeriformes	Turdidae		Turdus	Turdus rufiventris													Brazil	Piaui			PN Serra das Confusoes	-8.885	-43.455
LGEMA-401	LGEMA-401			Universidade de Sao Paulo, Departamento de Botanica	Chordata	Aves	Passeriformes	Pipridae		Tyranneutes	Tyranneutes stolzmanni				S									Brazil	Mato Grosso			Fazenda Ipe, Vila Rica	-9.967	-50.951	219
LGEMA-2753	125		LGEMA	Universidade de Sao Paulo, Departamento de Botanica	Chordata	Aves	Passeriformes	Tyrannidae		Tyrannus	Tyrannus melancholicus													Brazil	Piaui			PN Serra das Confusoes	-8.885	-43.455
LGEMA-10336	A0170			Universidade de Sao Paulo, Departamento de Botanica	Chordata	Aves	Passeriformes	Tyrannidae		Tyrannus	Tyrannus melancholicus													Brazil	Sao Paulo			Praias de Boraceia e Guaratuba, Bertioga	-23.753	-45.893
LGEMA-3608	182		LGEMA	Universidade de Sao Paulo, Departamento de Botanica	Chordata	Aves	Piciformes	Picidae		Veniliornis	Veniliornis passerinus													Brazil	Piaui			PN Serra das Confusoes	-8.885	-43.455
MKP 2695	MKP 2695			Royal Ontario Museum	Chordata	Aves	Passeriformes	Vireonidae		Vireo	Vireo altiloquus				S		ssp: altiloquus					22-Apr-1996		Dominican Republic				Parque Nationale del Este	18.406	-68.805
MKP 2691	MKP 2691			Royal Ontario Museum	Chordata	Aves	Passeriformes	Vireonidae		Vireo	Vireo altiloquus			M	S		ssp:altiloquus				Peck, M.	21-Apr-1996		Dominican Republic				Parque Nationale del Este	18.406	-68.805
MKP 2688	MKP 2688			Royal Ontario Museum	Chordata	Aves	Passeriformes	Vireonidae		Vireo	Vireo altiloquus			F	S		ssp:altiloquus				Peck, M.	21-Apr-1996		Dominican Republic				Parque Nationale del Este	18.406	-68.805
MRW 15	MRW 15			Royal Ontario Museum	Chordata	Aves	Passeriformes	Vireonidae		Vireo	Vireo crassirostris				S		ssp: crassirostris					09-Jul-1996		Bahamas				Bahamian Res Stn, San Salvador	24.033	-74.467
MRW 12	MRW 12			Royal Ontario Museum	Chordata	Aves	Passeriformes	Vireonidae		Vireo	Vireo crassirostris				S		ssp: crassirostris					09-Jul-1996		Bahamas				Bahamian Res Stn, San Salvador	24.033	-74.467
JCB 5734	JCB 5734			Royal Ontario Museum	Chordata	Aves	Passeriformes	Vireonidae		Vireo	Vireo flavoviridis				S							01-Jan-1993		Mexico	Nayarit				21.983	-104.982
331130	2661			Royal Ontario Museum	Chordata	Aves	Passeriformes	Vireonidae		Vireo	Vireo modestus				S							01-Jan-1991		Jamaica
MKP 2694	MKP 2694			Royal Ontario Museum	Chordata	Aves	Passeriformes	Vireonidae		Vireo	Vireo nanus			F	S						Peck, M.	22-Apr-1996		Dominican Republic				Parque Nationale del Este	18.406	-68.805
MKP 2693	MKP 2693			Royal Ontario Museum	Chordata	Aves	Passeriformes	Vireonidae		Vireo	Vireo nanus			F	S						Peck, M.	22-Apr-1996		Dominican Republic				Parque Nationale del Este	18.406	-68.805
MKP 2692	MKP 2692			Royal Ontario Museum	Chordata	Aves	Passeriformes	Vireonidae		Vireo	Vireo nanus			M	S							22-Apr-1996		Dominican Republic				Parque Nationale del Este	18.406	-68.805
MKP 2689	MKP 2689			Royal Ontario Museum	Chordata	Aves	Passeriformes	Vireonidae		Vireo	Vireo nanus			M	S							21-Apr-1996		Dominican Republic				Parque Nationale del Este	18.406	-68.805
LGEMA-9577	AMZ016		LGEMA	Universidade de Sao Paulo, Departamento de Botanica	Chordata	Aves	Passeriformes	Vireonidae		Vireo	Vireo olivaceus													Brazil	Amazonas			Estrada Manacapuru-Novo Airao Km75	-3.075	-60.82
LGEMA-1587	16	MZUSP		Universidade de Sao Paulo, Departamento de Botanica	Chordata	Aves	Passeriformes	Vireonidae		Vireo	Vireo olivaceus													Brazil	Sao Paulo			Serra do Mar, Nucleo Curucutu	-23.924	-46.668
LGEMA-1381	ITA304			Universidade de Sao Paulo, Departamento de Botanica	Chordata	Aves	Passeriformes	Vireonidae		Vireo	Vireo olivaceus			F										Brazil	Parana			Venceslau Bras	-23.847	-49.795
LGEMA-9578		AMZ017		Universidade de Sao Paulo, Departamento de Botanica	Chordata	Aves	Passeriformes	Vireonidae		Vireo	Vireo olivaceus													Brazil	Amazonas			Estrada Manacapuru-Novo Airao Km75	-3.075	-60.82
LGEMA-2978	A0104			Universidade de Sao Paulo, Departamento de Botanica	Chordata	Aves	Passeriformes	Vireonidae		Vireo	Vireo olivaceus													Brazil	Sao Paulo			Buri	-23.8	-48.59
LGEMA-9624		AMZ063		Universidade de Sao Paulo, Departamento de Botanica	Chordata	Aves	Passeriformes	Pipridae		Xenopipo	Xenopipo atronitens													Brazil	Amazonas			Estrada Manacapuru-Novo Airao Km75	-3.075	-60.82
LGEMA-9679	AMZ118		LGEMA	Universidade de Sao Paulo, Departamento de Botanica	Chordata	Aves	Passeriformes	Furnariidae		Xenops	Xenops minutus													Brazil	Amazonas			Estrada Manacapuru-Novo Airao Km75	-3.075	-60.82
LGEMA-499	970300			Universidade de Sao Paulo, Departamento de Botanica	Chordata	Aves	Passeriformes	Furnariidae		Xenops	Xenops rutilans													Brazil	Mato Grosso			Aripuana	-9.18	-60.63
LGEMA-2710	30			Universidade de Sao Paulo, Departamento de Botanica	Chordata	Aves	Passeriformes	Furnariidae		Xiphocolaptes	Xiphocolaptes falcirostris													Brazil	Piaui			PN Serra das Confusoes	-8.885	-43.455
LGEMA-9614	AMZ053		LGEMA	Universidade de Sao Paulo, Departamento de Botanica	Chordata	Aves	Passeriformes	Cotingidae		Xipholena	Xipholena punicea													Brazil	Amazonas			Estrada Manacapuru-Novo Airao Km75	-3.075	-60.82
LGEMA-424	970032		LGEMA	Universidade de Sao Paulo, Departamento de Botanica	Chordata	Aves	Passeriformes	Furnariidae		Xiphorhynchus	Xiphorhynchus elegans			M	S									Brazil	Mato Grosso			Aripuana	-9.18	-60.63
JCB 5726	JCB 5726	157838		Royal Ontario Museum	Chordata	Aves	Passeriformes	Furnariidae		Xiphorhynchus	Xiphorhynchus flavigaster			M	S	A	ssp mentalis	voucher kind: Skeleton,skin				25-May-1993		Mexico	Nayarit			Sragayta	21.033	-105.333
LGEMA-1580		MZUZP	LGEMA	Universidade de Sao Paulo, Departamento de Botanica	Chordata	Aves	Passeriformes	Furnariidae		Xiphorhynchus	Xiphorhynchus fuscus													Brazil	Sao Paulo			Serra do Mar, Nucleo Curucutu	-23.924	-46.668
LGEMA-2654	GSC29			Universidade de Sao Paulo, Departamento de Botanica	Chordata	Aves	Passeriformes	Furnariidae		Xiphorhynchus	Xiphorhynchus fuscus													Brazil	Bahia			Lencois	-12.433	-41.363	520
LGEMA-9637	AMZ076		LGEMA	Universidade de Sao Paulo, Departamento de Botanica	Chordata	Aves	Passeriformes	Furnariidae		Xiphorhynchus	Xiphorhynchus guttatus													Brazil	Amazonas			Estrada Manacapuru-Novo Airao Km75	-3.075	-60.82
LGEMA-3248		MZUSP-76545		Universidade de Sao Paulo, Departamento de Botanica	Chordata	Aves	Passeriformes	Furnariidae		Xiphorhynchus	Xiphorhynchus guttatus													Brazil	Maranhao			Horto Pompeia, Acailandia	-4.093	-47.299
LGEMA-431	970270			Universidade de Sao Paulo, Departamento de Botanica	Chordata	Aves	Passeriformes	Furnariidae		Xiphorhynchus	Xiphorhynchus guttatus													Brazil	Mato Grosso			Aripuana	-9.18	-60.63
LGEMA-9582	AMZ021		LGEMA	Universidade de Sao Paulo, Departamento de Botanica	Chordata	Aves	Passeriformes	Furnariidae		Xiphorhynchus	Xiphorhynchus ocellatus													Brazil	Amazonas			Estrada Manacapuru-Novo Airao Km75	-3.075	-60.82
389677	389677		FMNH	Field Museum of Natural History	Chordata	Aves	Ciconiiformes	Ardeidae		Zebrilus	Zebrilus undulatus			M	S			skin and skeleton at Museu Goeldi				16-Nov-1986		Brazil	Rondonia			Cachoeira Nazare, W bank Rio Jiparana	-10.878	-61.947	100
SCL 539	SCL 539	155549		Royal Ontario Museum	Chordata	Aves	Passeriformes	Emberizidae		Zonotrichia	Zonotrichia capensis			M	S	A	ssp:hypoleuca	voucher kind: skin; skeleton			Lougheed, S C	24-Jan-1989		Argentina	Jujuy			18.6 km NW Abra Pampa, along Rta 7, Jct of old and new routes	-22.35	-65.5
SCL 280	SCL 280	154091		Royal Ontario Museum	Chordata	Aves	Passeriformes	Emberizidae		Zonotrichia	Zonotrichia capensis			M	S	A	ssp:pulacayensis	voucher kind: skin; skeleton			Lougheed, S C	06-Jan-1988		Argentina	Jujuy			4 km W La Quiaca, on Rta 5, (road to Yavi Village)	-22.02	-65.05
SCL 142	SCL 142	153953		Royal Ontario Museum	Chordata	Aves	Passeriformes	Emberizidae		Zonotrichia	Zonotrichia capensis			M	S	A	ssp:hypoleuca	voucher kind: skin; skeleton			Lougheed, S C	27-Nov-1987		Argentina	Tucuman			km 43 on Rta 307, road from Acheral to Tafi del Valle	-27.01	-65.5
MACN-Or-ct 2359		MACN-Or 70448	MACN	Museo Argentino de Ciencias Naturales	Chordata	Aves	Falconiformes	Accipitridae		Accipiter	Accipiter bicolor			F			Bicolored Hawk					19-Feb-2007		Argentina	Corrientes	Distrito Capital		Estacion Biologica Corrientes, Provincia de	-27.551	-58.684
MACN-Or-ct 1561	MB 09	MACN-Or 69793	MACN	Museo Argentino de Ciencias Naturales	Chordata	Aves	Falconiformes	Accipitridae		Accipiter	Accipiter bicolor						Bicolored Hawk	Originally entered as "Spiziapteryx circumcinctus (passerinus)"				02-May-2006		Argentina	Corrientes	Distrito Capital		Estacion biologica de Corrientes (Arrocera)	-27.551	-58.684
MACN-Or-ct 708	MBR 6859	KUNHM 96826	KUNHM	University of Kansas, Natural History Museum	Chordata	Aves	Falconiformes	Accipitridae		Accipiter	Accipiter bicolor			F			Bicolored Hawk					23-Oct-2005		Argentina	Jujuy			Sierra Santa Barbara, eastern slope	-24.12	-64.456	1975
MACN-Or-cp 16		MACN-Or 66949	MACN	Museo Argentino de Ciencias Naturales	Chordata	Aves	Falconiformes	Accipitridae		Accipiter	Accipiter erythronemius			F			Rufous-thighed Hawk					09-Dec-1996		Argentina	Corrientes			Estero Valenzuela	-27.5801	-58.6599
MACN-Or-cp 15		MACN-Or 67670	MACN	Museo Argentino de Ciencias Naturales	Chordata	Aves	Falconiformes	Accipitridae		Accipiter	Accipiter erythronemius			F			Rufous-thighed Hawk					20-Mar-1998		Argentina	Corrientes			Estero Valenzuela	-27.5801	-58.6599
MACN-Or-ct 1723		MACN-Or 69926	MACN	Museo Argentino de Ciencias Naturales	Chordata	Aves	Falconiformes	Accipitridae		Accipiter	Accipiter erythronemius						Rufous-thighed Hawk					13-Sep-2006		Argentina	Corrientes	Distrito Capital	Estero Valenzuela	Estancia Relatz	-27.58	-58.66
MACN-Or-ct 1807		MACN-Or 70010	MACN	Museo Argentino de Ciencias Naturales	Chordata	Aves	Falconiformes	Accipitridae		Accipiter	Accipiter erythronemius			M		I	Rufous-thighed Hawk					10-Oct-2006		Argentina	Corrientes	Distrito Capital		Estacion Biologica Corrientes	-27.918	-59.14
MACN-Or-ct 2381		MACN-Or 70470	MACN	Museo Argentino de Ciencias Naturales	Chordata	Aves	Passeriformes	Icteridae		Agelaioides	Agelaioides badius						Bay-winged Cowbird					26-May-2007		Argentina	Corrientes	Distrito Capital		Estacion Biologica Corrientes, Provincia de	-27.551	-58.684
MACN-Or-ct 1909		MACN-Or 70108	MACN	Museo Argentino de Ciencias Naturales	Chordata	Aves	Passeriformes	Icteridae		Agelaioides	Agelaioides badius			F			Bay-winged Cowbird					22-Nov-2006		Argentina	Entre Rios	Rincon de Nogoya	Arroyo Nogoya	Ruta Nac. 11, Km 150	-32.75	-59.93
MACN-Or-ct 3235		MACN-Or 70940	MACN	Museo Argentino de Ciencias Naturales	Chordata	Aves	Passeriformes	Icteridae		Agelaioides	Agelaioides badius						Bay-winged Cowbird	37.1 g				29-Jul-2007		Argentina	Formosa	Laguna Blanca	Parque Nacional Pilcomayo	Estero Poi	-25.122	-58.334
MACN-Or-ct 2149		MACN-Or 70238	MACN	Museo Argentino de Ciencias Naturales	Chordata	Aves	Passeriformes	Icteridae		Agelaioides	Agelaioides badius						Bay-winged Cowbird					13-May-2007		Argentina	Buenos Aires			Baradero	-33.89	-59.35
MACN-Or-ct 2146		MACN-Or 70235	MACN	Museo Argentino de Ciencias Naturales	Chordata	Aves	Passeriformes	Icteridae		Agelaioides	Agelaioides badius						Bay-winged Cowbird					13-May-2007		Argentina	Buenos Aires			Baradero	-33.89	-59.35
MACN-Or-ct 3194		MACN-Or 70899	MACN	Museo Argentino de Ciencias Naturales	Chordata	Aves	Passeriformes	Icteridae		Agelaioides	Agelaioides badius			M		I	Bay-winged Cowbird	36.0 g				23-Jul-2007		Argentina	Formosa	Laguna Blanca	Parque Nacional Pilcomayo	Estero Poi	-25.122	-58.334
MACN-Or-ct 1594	MB 42	MACN-Or 69339	MACN	Museo Argentino de Ciencias Naturales	Chordata	Aves	Passeriformes	Icteridae		Agelaioides	Agelaioides badius						Bay-winged Cowbird	Molothrus (Agelaioides) badius				04-May-2006		Argentina	Corrientes	Distrito Capital		Estacion biologica de Corrientes	-27.551	-58.684
MACN-Or-ct 1593	MB 41	MACN-Or 69338	MACN	Museo Argentino de Ciencias Naturales	Chordata	Aves	Passeriformes	Icteridae		Agelaioides	Agelaioides badius						Bay-winged Cowbird	Molothrus (Agelaioides) badius				04-May-2006		Argentina	Corrientes	Distrito Capital		Estacion biologica de Corrientes	-27.551	-58.684
MACN-Or-ct 2240		MACN-Or 70329	MACN	Museo Argentino de Ciencias Naturales	Chordata	Aves	Anseriformes	Anatidae		Amazonetta	Amazonetta brasiliensis						Brazilian Teal					01-Jun-2007		Argentina	Buenos Aires	Coronel Pringles		Establecimiento "La Caledonia"	-37.98	-61.37
MACN-Or-ct 2226		MACN-Or 70315	MACN	Museo Argentino de Ciencias Naturales	Chordata	Aves	Anseriformes	Anatidae		Amazonetta	Amazonetta brasiliensis						Brazilian Teal							Argentina	Cordoba				-31.42	-64.18
MACN-Or-ct 2219		MACN-Or 70308	MACN	Museo Argentino de Ciencias Naturales	Chordata	Aves	Anseriformes	Anatidae		Amazonetta	Amazonetta brasiliensis						Brazilian Teal							Argentina	Corrientes			Esquina, Corrientes, Provincia de	-30.5	-59.53
MACN-Or-ct 2198		MACN-Or 70287	MACN	Museo Argentino de Ciencias Naturales	Chordata	Aves	Anseriformes	Anatidae		Amazonetta	Amazonetta brasiliensis						Brazilian Teal							Argentina	Corrientes			Esquina, Corrientes, Provincia de	-30.5	-59.53
MACN-Or-ct 1759		MACN-Or 69962	MACN	Museo Argentino de Ciencias Naturales	Chordata	Aves	Anseriformes	Anatidae		Amazonetta	Amazonetta brasiliensis						Brazilian Teal					20-Sep-2006		Argentina	Corrientes	Distrito Capital	Estero Valenzuela	Estancia Relatz	-27.58	-58.66
MACN-Or-ct 1757		MACN-Or 69960	MACN	Museo Argentino de Ciencias Naturales	Chordata	Aves	Anseriformes	Anatidae		Amazonetta	Amazonetta brasiliensis						Brazilian Teal					20-Sep-2006		Argentina	Corrientes	Distrito Capital	Estero Valenzuela	Estancia Relatz	-27.58	-58.66
MACN-Or-ct 1758		MACN-Or 69961	MACN	Museo Argentino de Ciencias Naturales	Chordata	Aves	Anseriformes	Anatidae		Amazonetta	Amazonetta brasiliensis						Brazilian Teal					20-Sep-2006		Argentina	Corrientes	Distrito Capital	Estero Valenzuela	Estancia Relatz	-27.58	-58.66
MACN-Or-ct 1331		MACN-Or 69598	MACN	Museo Argentino de Ciencias Naturales	Chordata	Aves	Passeriformes	Tyrannidae		Anairetes	Anairetes flavirostris						Yellow-billed Tit-Tyrant					13-Jul-2006		Argentina	Mendoza	Santa Rosa		Nacunan	-34.05	-67.95
MACN-Or-ct 1330		MACN-Or 69597	MACN	Museo Argentino de Ciencias Naturales	Chordata	Aves	Passeriformes	Tyrannidae		Anairetes	Anairetes flavirostris			F			Yellow-billed Tit-Tyrant					13-Jul-2006		Argentina	Mendoza	Santa Rosa		Nacunan	-34.05	-67.95
MACN-Or-ct 1053	KSB 647		CUMV	Cornell University, Museum of Vertebrates	Chordata	Aves	Passeriformes	Tyrannidae		Anairetes	Anairetes flavirostris			M			Yellow-billed Tit-Tyrant					05-Nov-2005		Argentina	Jujuy	Volcan			-23.9	-65.4667	2175
MACN-Or-ct 2820		MACN-Or 70714	MACN	Museo Argentino de Ciencias Naturales	Chordata	Aves	Passeriformes	Tyrannidae		Anairetes	Anairetes parulus			M			Tufted Tit-Tyrant					18-Nov-2006		Argentina	Rio Negro	Las Grutas		S Las Grutas	-40.827	-65.11
MACN-Or-ct 680	GFB 3499	MACN-Or 68732	MACN	Museo Argentino de Ciencias Naturales	Chordata	Aves	Passeriformes	Tyrannidae		Anairetes	Anairetes parulus			F			Tufted Tit-Tyrant					24-Jan-2005		Argentina	Rio Negro	Pilcaniyeu	Estancia Neneo Ruca		-41.1542	-70.4075	850
MACN-Or-ct 550	PRS 2849		AMNH	American Museum of Natural History	Chordata	Aves	Passeriformes	Tyrannidae		Anairetes	Anairetes parulus			M			Tufted Tit-Tyrant					20-Jan-2005		Argentina	Rio Negro	Pilcaniyeu	Estancia Neneo Ruca		-41.1542	-70.4075	850
MACN-Or-ct 850	MBR 6927	KUNHM 96911	KUNHM	University of Kansas, Natural History Museum	Chordata	Aves	Passeriformes	Tyrannidae		Anairetes	Anairetes parulus			M			Tufted Tit-Tyrant					07-Nov-2005		Argentina	Jujuy	Quebralena			-23.2667	-65.75	7650
MACN-Or-ct 273		MACN-Or 68969	MACN	Museo Argentino de Ciencias Naturales	Chordata	Aves	Anseriformes	Anatidae		Anas	Anas bahamensis			M			White-cheeked Pintail					01-Aug-2005		Argentina	Buenos Aires			Laguna de Henderson	-36.3	-61.7
MACN-Or-ct 250		MACN-Or 68973	MACN	Museo Argentino de Ciencias Naturales	Chordata	Aves	Anseriformes	Anatidae		Anas	Anas cyanoptera			M			Cinnamon Teal					01-Aug-2005		Argentina	Buenos Aires			Laguna De Henderson, Provincia de Buenos Aires (36.30 S, 61.70 W)	-36.3	-61.7
MACN-Or-ct 2164		MACN-Or 70253	MACN	Museo Argentino de Ciencias Naturales	Chordata	Aves	Anseriformes	Anatidae		Anas	Anas cyanoptera						Cinnamon Teal					12-May-2007		Argentina	Santa Fe			Villa Canas	-34.5	-61.62
MACN-Or-ct 242		MACN-Or 69471	MACN	Museo Argentino de Ciencias Naturales	Chordata	Aves	Anseriformes	Anatidae		Anas	Anas cyanoptera			M			Cinnamon Teal					11-Jul-2005		Argentina	Santa Fe			Rafaela	-31.17	-61.47
MACN-Or-ct 1194	KGM 1142		UAF	University of Alaska Fairbanks	Chordata	Aves	Anseriformes	Anatidae		Anas	Anas cyanoptera			M			Cinnamon Teal					14-Nov-2005		Argentina	Catamarca			Embalse Cortaderas	-27.556	-68.145	3369
MACN-Or-ct 1178	KGM 1110		UAF	University of Alaska Fairbanks	Chordata	Aves	Anseriformes	Anatidae		Anas	Anas cyanoptera			M			Cinnamon Teal					08-Nov-2005		Argentina	Catamarca		Antogasta de la	Laguna de Antofagasta	-26.113	-67.424	3338
MACN-Or-ct 1233	KGM 1217		UAF	University of Alaska Fairbanks	Chordata	Aves	Anseriformes	Anatidae		Anas	Anas flavirostris			M			Speckled Teal					01-Dec-2005		Argentina	Mendoza			Arroyo Hondo Ruta Provincial 101	-34.948	-69.289	1627
MACN-Or-ct 1245	KGM 1229		UAF	University of Alaska Fairbanks	Chordata	Aves	Anseriformes	Anatidae		Anas	Anas flavirostris			M			Speckled Teal					03-Dec-2005		Argentina	Mendoza			Rio Grande	-35.869	-69.934	1470
MACN-Or-ct 1220	KGM 1204		UAF	University of Alaska Fairbanks	Chordata	Aves	Anseriformes	Anatidae		Anas	Anas flavirostris			M			Speckled Teal					26-Nov-2005		Argentina	Santa Cruz			Rio San Juan, ca. Calingasta	-31.332	-69.417	1359
MACN-Or-ct 1189	KGM 1129	MACN-Or 69553	MACN	Museo Argentino de Ciencias Naturales	Chordata	Aves	Anseriformes	Anatidae		Anas	Anas flavirostris			M			Speckled Teal					13-Nov-2005		Argentina	Catamarca			Ca. La Gruta	-26.925	-68.146	4020
MACN-Or-ct 1262	KGM 1246		UAF	University of Alaska Fairbanks	Chordata	Aves	Anseriformes	Anatidae		Anas	Anas flavirostris			M			Speckled Teal					07-Dec-2005		Argentina	Neuquen			Rio Litran, 23 Km SW of Paso Pino Hachado	-38.803	-70.953
MACN-Or-ct 2237		MACN-Or 70326	MACN	Museo Argentino de Ciencias Naturales	Chordata	Aves	Anseriformes	Anatidae		Anas	Anas georgica						Yellow-billed Pintail					01-Jun-2007		Argentina	Buenos Aires	Coronel Pringles		Establecimiento "La Caledonia"	-37.98	-61.37
MACN-Or-ct 271		MACN-Or 68967	MACN	Museo Argentino de Ciencias Naturales	Chordata	Aves	Anseriformes	Anatidae		Anas	Anas georgica			M			Yellow-billed Pintail					01-Aug-2005		Argentina	Buenos Aires			Laguna de Henderson	-36.3	-61.7
MACN-Or-ct 1265	KGM 1249		UAF	University of Alaska Fairbanks	Chordata	Aves	Anseriformes	Anatidae		Anas	Anas georgica			M			Yellow-billed Pintail					07-Dec-2005		Argentina	Neuquen			E of Lago Norquinco	-39.144	-71.202	1052
MACN-Or-ct 1250	KGM 1234		UAF	University of Alaska Fairbanks	Chordata	Aves	Anseriformes	Anatidae		Anas	Anas georgica			M			Yellow-billed Pintail					04-Dec-2005		Argentina	Mendoza			Ca. Arroyo Malo	-35.172	-69.852	1809
MACN-Or-ct 1219	KGM 1203		UAF	University of Alaska Fairbanks	Chordata	Aves	Anseriformes	Anatidae		Anas	Anas georgica			F			Yellow-billed Pintail					26-Nov-2005		Argentina	Santa Cruz			S of Calingasta	-31.456	-69.4	1445
MACN-Or-ct 1165	KGM 1076		UAF	University of Alaska Fairbanks	Chordata	Aves	Anseriformes	Anatidae		Anas	Anas georgica			M			Yellow-billed Pintail					05-Nov-2005		Argentina	Catamarca		Antofagasta de la	Laguna de Antofagasta	-26.113	-67.424	3330
MACN-Or-ct 2241		MACN-Or 70330	MACN	Museo Argentino de Ciencias Naturales	Chordata	Aves	Anseriformes	Anatidae		Anas	Anas platalea						Red Shoveler					01-Jun-2007		Argentina	Buenos Aires	Coronel Pringles		Establecimiento "La Caledonia"	-37.98	-61.37
MACN-Or-ct 2235		MACN-Or 70324	MACN	Museo Argentino de Ciencias Naturales	Chordata	Aves	Anseriformes	Anatidae		Anas	Anas platalea						Red Shoveler					01-Jun-2007		Argentina	Buenos Aires	Coronel Pringles		Establecimiento "La Caledonia"	-37.98	-61.37
MACN-Or-ct 1255	KGM 1239		UAF	University of Alaska Fairbanks	Chordata	Aves	Anseriformes	Anatidae		Anas	Anas platalea			M			Red Shoveler					05-Dec-2005		Argentina	Neuquen			Laguna de Auquinco	-37.338	-69.98	1410
MACN-Or-ct 1267	KGM 1079		UAF	University of Alaska Fairbanks	Chordata	Aves	Anseriformes	Anatidae		Anas	Anas puna			M			Puna Teal					05-Nov-2005		Argentina	Catamarca		Antogasta de la	Laguna de Antofagasta	-26.113	-67.424	3338
MACN-Or-ct 1167	KGM 1078		UAF	University of Alaska Fairbanks	Chordata	Aves	Anseriformes	Anatidae		Anas	Anas puna			M			Puna Teal					05-Nov-2005		Argentina	Catamarca		Antogasta de la	Laguna de Antofagasta	-26.113	-67.424	3338
MACN-Or-ct 2236		MACN-Or 70325	MACN	Museo Argentino de Ciencias Naturales	Chordata	Aves	Anseriformes	Anatidae		Anas	Anas sibilatrix						Chiloe Wigeon					01-Jun-2007		Argentina	Buenos Aires	Coronel Pringles		Establecimiento "La Caledonia"	-37.98	-61.37
MACN-Or-ct 251		MACN-Or 68970	MACN	Museo Argentino de Ciencias Naturales	Chordata	Aves	Anseriformes	Anatidae		Anas	Anas sibilatrix			M			Chiloe Wigeon					01-Aug-2005		Argentina	Buenos Aires			Laguna De Henderson	-36.3	-61.7
MACN-Or-ct 1258	KGM 1242		UAF	University of Alaska Fairbanks	Chordata	Aves	Anseriformes	Anatidae		Anas	Anas sibilatrix			M			Chiloe Wigeon					05-Dec-2005		Argentina	Neuquen			Laguna de Auquinco	-37.338	-69.98	1410
MACN-Or-ct 1187	KGM 1127		UAF	University of Alaska Fairbanks	Chordata	Aves	Anseriformes	Anatidae		Anas	Anas sibilatrix			M			Chiloe Wigeon					13-Nov-2005		Argentina	Catamarca			Embalse Cortaderas	-27.559	-68.145	3359
MACN-Or-ct 1186	KGM 1126		UAF	University of Alaska Fairbanks	Chordata	Aves	Anseriformes	Anatidae		Anas	Anas sibilatrix			F			Chiloe Wigeon					13-Nov-2005		Argentina	Catamarca			Embalse Cortaderas	-27.559	-68.145	3359
MACN-Or-ct 577	PRS 2877		AMNH	American Museum of Natural History	Chordata	Aves	Anseriformes	Anatidae		Anas	Anas sibilatrix			M			Chiloe Wigeon					23-Jan-2005		Argentina	Rio Negro	Departamento Pilcaniyeu		Estancia Neneo Ruca	-41.15	-70.408
MACN-Or-ct 1244	KGM 1228		UAF	University of Alaska Fairbanks	Chordata	Aves	Anseriformes	Anatidae		Anas	Anas specularioides			M			Crested Duck	Anas (Lophonetta) specularioides				03-Dec-2005		Argentina	Mendoza			Puesto Pampa del Rodeo, 45 Km SW of Malarguee Ruta Nacional 40	-36.763	-69.628	1891
MACN-Or-ct 1234	KGM 1218		UAF	University of Alaska Fairbanks	Chordata	Aves	Anseriformes	Anatidae		Anas	Anas specularioides			M			Crested Duck	Anas (Lophonetta) specularioides				02-Dec-2005		Argentina	Mendoza			NW of El Sosneado	-35.012	-69.634	1670
MACN-Or-ct 1228	KGM 1212		UAF	University of Alaska Fairbanks	Chordata	Aves	Anseriformes	Anatidae		Anas	Anas specularioides			M			Crested Duck	Anas (Lophonetta) specularioides				29-Nov-2005		Argentina	Mendoza			E of Los Penitentes	-32.852	-69.801	2552
MACN-Or-ct 1199	KGM 1159		UAF	University of Alaska Fairbanks	Chordata	Aves	Anseriformes	Anatidae		Anas	Anas specularioides			M			Crested Duck	Anas (Lophonetta) specularioides				15-Nov-2005		Argentina	Catamarca			Laguna de los Aparejos	-27.648	-68.542	4106
MACN-Or-ct 1175	KGM 1088		UAF	University of Alaska Fairbanks	Chordata	Aves	Anseriformes	Anatidae		Anas	Anas specularioides			M			Crested Duck	Anas (Lophonetta) specularioides				07-Nov-2005		Argentina	Catamarca			Rio Punilla, 35 Km N of Antofagasta de la Sierra	-25.828	-67.284	4140
MACN-Or-ct 2386		MACN-Or 70475	MACN	Museo Argentino de Ciencias Naturales	Chordata	Aves	Anseriformes	Anatidae		Anas	Anas versicolor						Silver Teal					01-Jun-2007		Argentina	Corrientes			Arrocera, Corrientes, Provincia de	-27.551	-58.684
MACN-Or-ct 2208		MACN-Or 70297	MACN	Museo Argentino de Ciencias Naturales	Chordata	Aves	Anseriformes	Anatidae		Anas	Anas versicolor						Silver Teal							Argentina	Cordoba				-31.42	-64.18
MACN-Or-ct 2207		MACN-Or 70296	MACN	Museo Argentino de Ciencias Naturales	Chordata	Aves	Anseriformes	Anatidae		Anas	Anas versicolor						Silver Teal							Argentina	Cordoba				-31.42	-64.18
MACN-Or-ct 2385		MACN-Or 70474	MACN	Museo Argentino de Ciencias Naturales	Chordata	Aves	Anseriformes	Anatidae		Anas	Anas versicolor						Silver Teal					01-Jun-2007		Argentina	Corrientes			Arrocera, Corrientes, Provincia de	-27.551	-58.684
MACN-Or-ct 2384		MACN-Or 70473	MACN	Museo Argentino de Ciencias Naturales	Chordata	Aves	Anseriformes	Anatidae		Anas	Anas versicolor						Silver Teal					01-Jun-2007		Argentina	Corrientes			Arrocera, Corrientes, Provincia de	-27.551	-58.684
MACN-Or-ct 2192		MACN-Or 70281	MACN	Museo Argentino de Ciencias Naturales	Chordata	Aves	Anseriformes	Anatidae		Anas	Anas versicolor						Silver Teal					13-Jun-2007		Argentina	Corrientes			Esquina, Corrientes, Provincia de	-30.5	-59.53
MACN-Or-ct 249		MACN-Or 69474	MACN	Museo Argentino de Ciencias Naturales	Chordata	Aves	Anseriformes	Anatidae		Anas	Anas versicolor			M			Silver Teal					01-Aug-2005		Argentina	Buenos Aires			Laguna de Henderson	-36.3	-61.7
MACN-Or-ct 246		MACN-Or 68975	MACN	Museo Argentino de Ciencias Naturales	Chordata	Aves	Anseriformes	Anatidae		Anas	Anas versicolor						Silver Teal					11-Jul-2005		Argentina	Santa Fe			Rafaela	-31.17	-61.47
MACN-Or-ct 2367		MACN-Or 70456	MACN	Museo Argentino de Ciencias Naturales	Chordata	Aves	Pelecaniformes	Anhingidae		Anhinga	Anhinga anhinga						Anhinga					02-Apr-2007		Argentina	Corrientes	Distrito Capital		Estacion Biologica Corrientes, Provincia de	-27.551	-58.684
MACN-Or-ct 60		MACN-Or 68512	MACN	Museo Argentino de Ciencias Naturales	Chordata	Aves	Gruiformes	Rallidae		Aramides	Aramides cajanea			M			Grey-necked Wood-Rail					01-Dec-2003		Argentina	Buenos Aires		Magdalena	Ea. El Destino	-35.13	-57.38	15
MACN-Or-ct 1857		MACN-Or 70057	MACN	Museo Argentino de Ciencias Naturales	Chordata	Aves	Gruiformes	Rallidae		Aramides	Aramides cajanea						Gray-necked Wood-Rail					25-Oct-2006		Argentina	Corrientes	Distrito Capital		Estacion Biologica Corrientes	-27.918	-59.14
MACN-Or-ct 1828		MACN-Or 70030	MACN	Museo Argentino de Ciencias Naturales	Chordata	Aves	Gruiformes	Rallidae		Aramides	Aramides cajanea						Gray-necked Wood-Rail					15-Oct-2006		Argentina	Corrientes	Distrito Capital		Estacion Biologica Corrientes	-27.918	-59.14
MACN-Or-ct 2122		MACN-Or 70211	MACN	Museo Argentino de Ciencias Naturales	Chordata	Aves	Gruiformes	Rallidae		Aramides	Aramides ypecaha						Giant Wood-Rail					09-May-2007		Argentina	Buenos Aires	Baradero		Isla Las Palmas	-33.73	-59.26
MACN-Or-ct 1599	MB 47	MACN-Or 69818	MACN	Museo Argentino de Ciencias Naturales	Chordata	Aves	Gruiformes	Rallidae		Aramides	Aramides ypecaha			M			Giant Wood-Rail					05-May-2006		Argentina	Corrientes	Distrito Capital		Estacion biologica de Corrientes	-27.551	-58.684
MACN-Or-ct 1588	MB 36	MACN-Or 69812	MACN	Museo Argentino de Ciencias Naturales	Chordata	Aves	Gruiformes	Rallidae		Aramides	Aramides ypecaha			M			Giant Wood-Rail					04-May-2006		Argentina	Corrientes	Distrito Capital		Estacion biologica de Corrientes	-27.551	-58.684
MACN-Or-ct 1778		MACN-Or 69981	MACN	Museo Argentino de Ciencias Naturales	Chordata	Aves	Gruiformes	Aramidae		Aramus	Aramus guarauna			M		I	Limpkin					28-Sep-2006		Argentina	Corrientes	Distrito Capital		Estacion Biologica Corrientes, Provincia de	-27.551	-58.684
MACN-Or-ct 1669	MB 117	MACN-Or 69876	MACN	Museo Argentino de Ciencias Naturales	Chordata	Aves	Gruiformes	Aramidae		Aramus	Aramus guarauna						Limpkin					21-May-2006		Argentina	Corrientes	Distrito Capital		Estacion biologica de Corrientes (Arrocera)	-27.551	-58.684
MACN-Or-ct 1518		MACN-Or 69758	MACN	Museo Argentino de Ciencias Naturales	Chordata	Aves	Gruiformes	Aramidae		Aramus	Aramus guarauna						Limpkin					30-Apr-2006		Argentina	Corrientes	Distrito Capital		Estacion biologica de Corrientes (Arrocera)	-27.551	-58.684
MACN-Or-cp 59		MACN-Or 66934	MACN	Museo Argentino de Ciencias Naturales	Chordata	Aves	Psittaciformes	Psittacidae		Aratinga	Aratinga acuticaudata			F			Blue-crowned Parakeet					25-Sep-1997		Argentina	Corrientes			Estero Valenzuela	-27.5801	-58.6599
MACN-Or-cp 60		MACN-Or 66958	MACN	Museo Argentino de Ciencias Naturales	Chordata	Aves	Psittaciformes	Psittacidae		Aratinga	Aratinga acuticaudata			M			Blue-crowned Parakeet					12-Apr-1997		Argentina	Corrientes			Estero Valenzuela	-27.5801	-58.6599
MACN-Or-cp 58		MACN-Or 68279	MACN	Museo Argentino de Ciencias Naturales	Chordata	Aves	Psittaciformes	Psittacidae		Aratinga	Aratinga aurea			F			Peach-fronted Parakeet					30-Sep-1996		Paraguay	Neembucu	Ciudad de Pilar		Barrio General Diaz	-26.867	-58.383
MACN-Or-ct 1689	MB 137	MACN-Or 69301	MACN	Museo Argentino de Ciencias Naturales	Chordata	Aves	Psittaciformes	Psittacidae		Aratinga	Aratinga leucophthalma						White-eyed Parakeet					26-May-2006		Argentina	Corrientes	Distrito Capital	Estero Valenzuela	Estancia "Relatz"	-27.58	-58.66
MACN-Or-ct 1691	MB 139	MACN-Or 69302	MACN	Museo Argentino de Ciencias Naturales	Chordata	Aves	Psittaciformes	Psittacidae		Aratinga	Aratinga leucophthalma						White-eyed Parakeet					26-May-2006		Argentina	Corrientes	Distrito Capital	Estero Valenzuela	Estancia "Relatz"	-27.58	-58.66
MACN-Or-ct 986	FBG 005	MACN-Or 69119	MACN	Museo Argentino de Ciencias Naturales	Chordata	Aves	Psittaciformes	Psittacidae		Aratinga	Aratinga mitrata			F			Mitred Parakeet					28-Oct-2005		Argentina	Jujuy			Sierra Santa Barbara, eastern slope	-24.137	-64.455	1425
MACN-Or-ct 984	MJA 153		CUMV	Cornell University, Museum of Vertebrates	Chordata	Aves	Psittaciformes	Psittacidae		Aratinga	Aratinga mitrata			F			Mitred Parakeet					28-Oct-2005		Argentina	Jujuy			Sierra Santa Barbara, eastern slope	-24.12	-64.456	1975
MACN-Or-ct 773	MBR 6895	KUNHM 96822	KUNHM	University of Kansas, Natural History Museum	Chordata	Aves	Psittaciformes	Psittacidae		Aratinga	Aratinga mitrata			M			Mitred Parakeet					28-Oct-2005		Argentina	Jujuy			Sierra Santa Barbara, eastern slope	-24.12	-64.456	1975
MACN-Or-ct 2393		MACN-Or 70482	MACN	Museo Argentino de Ciencias Naturales	Chordata	Aves	Passeriformes	Emberizidae		Arremon	Arremon flavirostris						Saffron-billed Sparrow					07-Jun-2007		Argentina	Corrientes	Distrito Capital		Estacion Biologica Corrientes, Provincia de	-27.551	-58.684
MACN-Or-ct 2964		MACN-Or 69256	MACN	Museo Argentino de Ciencias Naturales	Chordata	Aves	Passeriformes	Emberizidae		Arremon	Arremon flavirostris						Saffron-billed Sparrow					16-Dec-2006		Argentina	Misiones	Iguazu		Parque Nacional Iguazu	-25.679	-54.449	80
MACN-Or-ct 1388		MACN-Or 69636	MACN	Museo Argentino de Ciencias Naturales	Chordata	Aves	Passeriformes	Emberizidae		Arremon	Arremon flavirostris						Saffron-billed Sparrow					26-Apr-2006		Argentina	Corrientes	Distrito Capital		Estacion biologica de Corrientes	-27.551	-58.684
MACN-Or-ct 1700	MB 148	MACN-Or 69904	MACN	Museo Argentino de Ciencias Naturales	Chordata	Aves	Passeriformes	Emberizidae		Arremon	Arremon flavirostris			M			Saffron-billed Sparrow					29-May-2006		Argentina	Corrientes	Distrito Capital		Estacion biologica de Corrientes	-27.551	-58.684
MACN-Or-ct 887	MDE 208	KUNHM 96927	KUNHM	University of Kansas, Natural History Museum	Chordata	Aves	Passeriformes	Emberizidae		Arremon	Arremon flavirostris			M			Saffron-billed Sparrow					11-Nov-2005		Argentina	Jujuy	2 KM E of Ocloya			-23.933	-65.217	1550
MACN-Or-ct 1140	PB 032	MACN-Or 69204	MACN	Museo Argentino de Ciencias Naturales	Chordata	Aves	Passeriformes	Emberizidae		Arremon	Arremon flavirostris			M			Saffron-billed Sparrow					12-Nov-2005		Argentina	Jujuy	2 KM E of Ocloya			-23.933	-65.217	1550
MACN-Or-ct 1143	MJA 206		CUMV	Cornell University, Museum of Vertebrates	Chordata	Aves	Passeriformes	Emberizidae		Arremon	Arremon flavirostris			M			Saffron-billed Sparrow					12-Nov-2005		Argentina	Jujuy	2 KM E of Ocloya			-23.933	-65.217	1550
MACN-Or-ct 2862		MACN-Or 70736	MACN	Museo Argentino de Ciencias Naturales	Chordata	Aves	Passeriformes	Furnariidae		Automolus	Automolus leucophthalmus			F		I	White-eyed Foliage-gleaner					09-Dec-2006		Argentina	Misiones	Iguazu		Parque Nacional Iguazu	-25.679	-54.449	80
MACN-Or-ct 2858		MACN-Or 69221	MACN	Museo Argentino de Ciencias Naturales	Chordata	Aves	Passeriformes	Furnariidae		Automolus	Automolus leucophthalmus			M			White-eyed Foliage-gleaner					09-Dec-2006		Argentina	Misiones	Iguazu		Parque Nacional Iguazu	-25.679	-54.449	80
MACN-Or-ct 2841		MACN-Or 69246	MACN	Museo Argentino de Ciencias Naturales	Chordata	Aves	Passeriformes	Furnariidae		Automolus	Automolus leucophthalmus			F			White-eyed Foliage-gleaner					06-Dec-2006		Argentina	Misiones	Iguazu		Parque Nacional Iguazu	-25.679	-54.449	80
MACN-Or-ct 2855		MACN-Or 69247	MACN	Museo Argentino de Ciencias Naturales	Chordata	Aves	Passeriformes	Furnariidae		Automolus	Automolus leucophthalmus						White-eyed Foliage-gleaner					08-Dec-2006		Argentina	Misiones	Iguazu		Parque Nacional Iguazu	-25.679	-54.449	80
[truncated: 719 more rows]
